# Supplementary material for: A general photoinduced oxidative strategy with molecular oxygen in water
Source: Royal Society of Chemistry journal article supplement (doi:10.1039/d3qo02099a), 2024-01-01

# A General Photoinduced Oxidative Strategy with Molecular Oxygen in Water

Jianyu Gu, Hui Yang, Jinfei Deng, Dengbo Jiang, Kaizhuo Lv, Tao Wang, and Qiuli Yao\*

## Supporting Information

|                                       |     |
|---------------------------------------|-----|
| 1. General Experiments.....           | S1  |
| 2. Supplement Figures and Tables..... | S2  |
| 3. Experimental Procedure.....        | S6  |
| 4. Mechanistic Studies.....           | S24 |
| 5. References.....                    | S30 |
| 6. NMR Spectra.....                   | S33 |

### 1. General Experiments

NMR spectra were recorded on an Agilent-NMR-VNMRs 400 MHz spectrometer or Bruker Advance 400 MHz spectrometer. Chemical shifts are reported in parts per million (ppm) and referenced to CDCl<sub>3</sub> (7.26 ppm) for <sup>1</sup>H NMR, and CDCl<sub>3</sub> (77.16 ppm) for <sup>13</sup>C NMR. Chemical shifts are reported in parts per million (ppm) and referenced to DMSO-*d*<sub>6</sub> (2.50 ppm) for <sup>1</sup>H NMR, and DMSO-*d*<sub>6</sub> (39.25 ppm) for <sup>13</sup>C NMR. GC-MS analyses were performed with an Agilent 8890-597BGCMSD spectrometer. UV-visible spectrum was recorded by a Shanghai Yidian 752N UV-visible spectrophotometer. The fluorescence was studied with a HORIBA FluoroMax-4 spectrophotometer. The color of the solution was taken by a cell phone Huawei Nova 6. The Column chromatography or preparative thin-layer chromatography (TLC) was performed with Qing Dao silica gel. All reagents and solvents were used directly as purchased.

## 2. Supplement Figures and Tables

### Figure S1. Supplement Figures

(a) Photo-reactors placed on the top middle of

quartz tubes

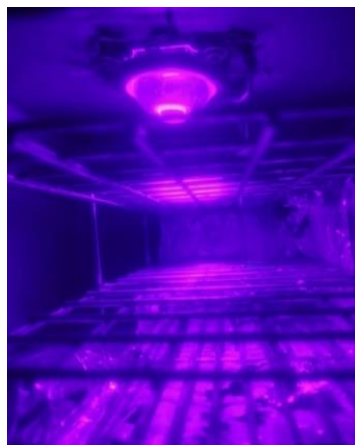

(b) LED lamps (420 nm, 20 W, Taiwan Guanghong,

EP-U4545k-A3)

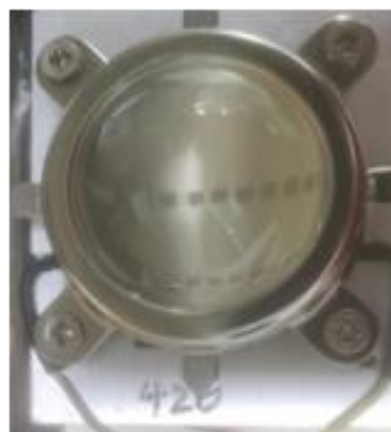

(c) UV-visible spectra of diacetyl and **12a**

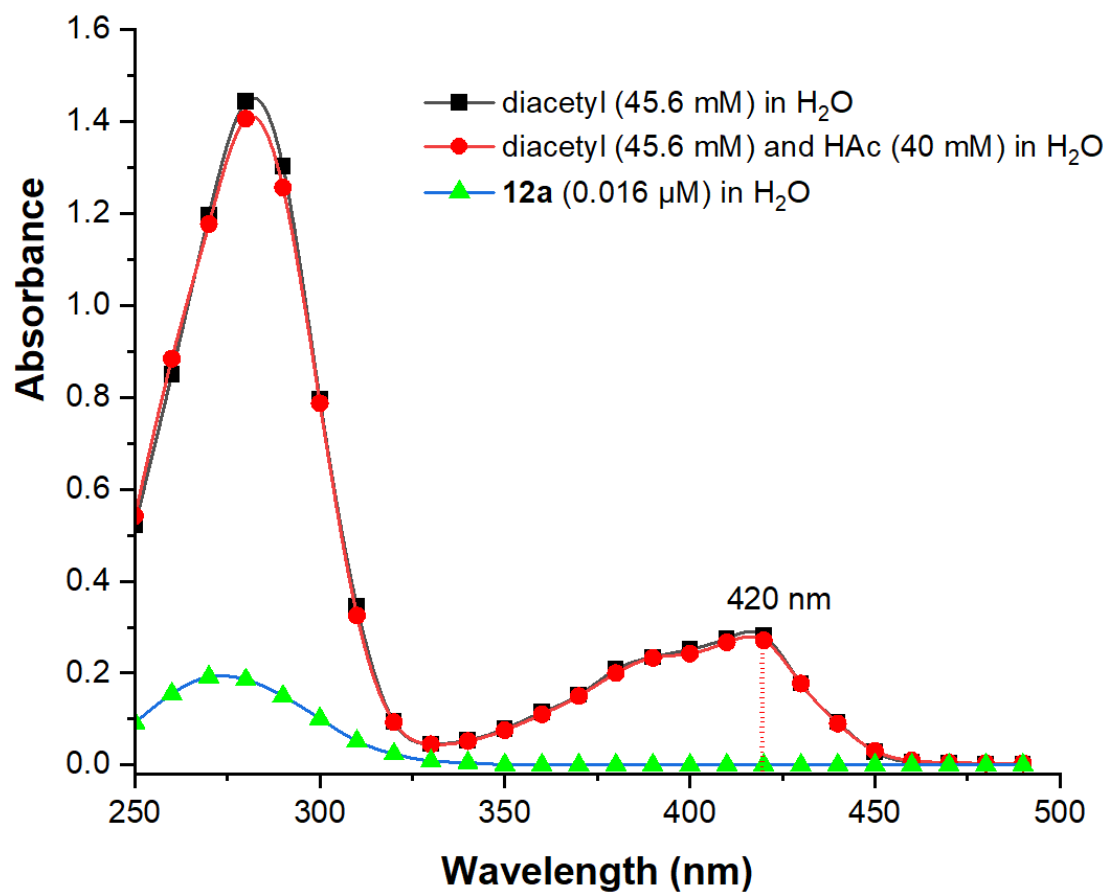

(d) Fluorescent spectra of diacetyl and **1a**

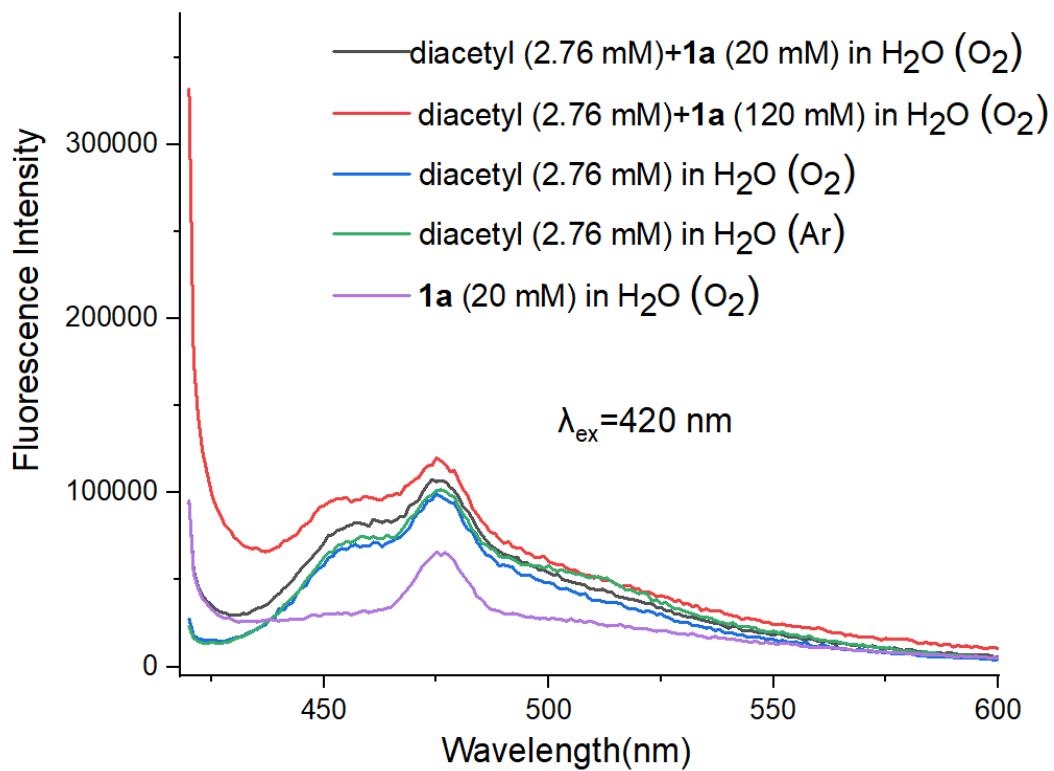

**Table S1.** Optimization of conditions for the oxidation of alcohol **12a**.<sup>a</sup>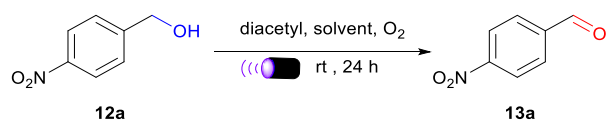

| entry | diacetyl/equiv | solvent               | yield/%        |
|-------|----------------|-----------------------|----------------|
| 1     | -              | H <sub>2</sub> O      | 0              |
| 2     | 9              | H <sub>2</sub> O      | 0 <sup>b</sup> |
| 3     | 9              | H <sub>2</sub> O      | 0 <sup>c</sup> |
| 4     | 9              | CHCl <sub>3</sub>     | 37             |
| 5     | 9              | MeCN                  | 29             |
| 6     | 9              | MeOH                  | 37             |
| 7     | 9              | THF                   | 0              |
| 8     | 9              | DMSO                  | 43             |
| 9     | 9              | DMF                   | 31             |
| 10    | 9              | acetone               | 53             |
| 11    | 1              | H <sub>2</sub> O      | 50             |
| 12    | 2              | H <sub>2</sub> O      | 62             |
| 13    | 3              | H <sub>2</sub> O      | 68             |
| 14    | <b>4</b>       | <b>H<sub>2</sub>O</b> | <b>83</b>      |
| 15    | 5              | H <sub>2</sub> O      | 59             |
| 16    | 6              | H <sub>2</sub> O      | 57             |

<sup>a</sup> Reaction conditions: **12a** (0.15 mmol), diacetyl, solvent (0.6 mL, the reaction mixture was bubbled with O<sub>2</sub> for 15 min), purple LEDs (20 W), 24 h, isolated yield after column chromatography. <sup>b</sup> Under argon atmosphere. <sup>c</sup> In the dark.

**Table S2.** Optimization of conditions for the oxidation of alcohol **15a**.<sup>a</sup>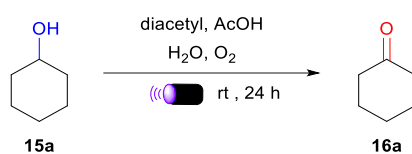

| entry | diacetyl/equiv | AcOH/equiv  | yield/%        |
|-------|----------------|-------------|----------------|
| 1     | 2              | 16.7        | 41             |
| 2     | 3              | 16.7        | 43             |
| 3     | 4              | 16.7        | 52             |
| 4     | 5              | 16.7        | 53             |
| 5     | 6              | 16.7        | 53             |
| 6     | 7              | 16.7        | 59             |
| 7     | <b>8</b>       | <b>16.7</b> | <b>96</b>      |
| 8     | 9              | 16.7        | 92             |
| 9     | 9              | 16.7        | 0 <sup>b</sup> |
| 10    | 9              | 16.7        | 0 <sup>c</sup> |
| 11    | -              | 16.7        | 0              |
| 12    | 8              | -           | 36             |
| 13    | 8              | 0.25        | 58             |
| 14    | 8              | 0.5         | 64             |
| 15    | 8              | 0.8         | 73             |
| 16    | 8              | 1           | 71             |
| 17    | 8              | 2           | 51             |
| 18    | 8              | 3           | 51             |
| 19    | 8              | 4           | 80             |
| 20    | <b>8</b>       | <b>5</b>    | <b>96</b>      |
| 21    | 8              | 7           | 92             |
| 22    | 8              | 8           | 88             |
| 23    | 8              | 10          | 84             |
| 24    | 8              | 12          | 44             |

<sup>a</sup> Reaction conditions: **15a** (0.15 mmol), diacetyl, H<sub>2</sub>O (0.6 mL, the reaction mixture was bubbled with O<sub>2</sub> for 15 min), purple LEDs (20 W), 24 h, GC-MS yield with 1,3,5-trimethylbenzene as internal standard. <sup>b</sup> Under argon atmosphere. <sup>c</sup> In the dark.

### 3. Experimental procedure

#### (1) General procedure for the oxidation of C–H bond, alkenes, alkynes, or halides

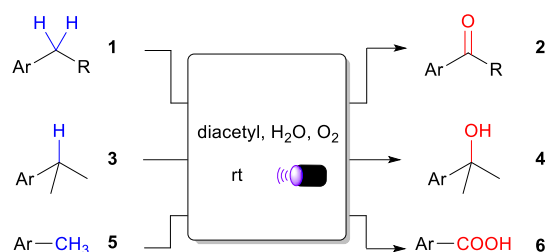

To a 10 mL quartz tube charged with a magnetic stir bar was added **1/3/5** (0.15 mmol), diacetyl (0.45 mmol, 3 equiv, 39.5  $\mu$ L), and H<sub>2</sub>O (0.6 mL). The mixture was bubbled with O<sub>2</sub> for 15 min and then irradiated by purple LEDs (420 nm, 20 W) with vigorous stirring at room temperature. After 24–36 h, the solution was extracted with EtOAc (3 mL $\times$ 3). The combined organic layers were washed with brine (2 mL), dried with anhydrous Na<sub>2</sub>SO<sub>4</sub>, and purified by column chromatography with petroleum ether/EtOAc (100:0–2:1) to afford products **2/4/6** in yields as indicated in Table 2.

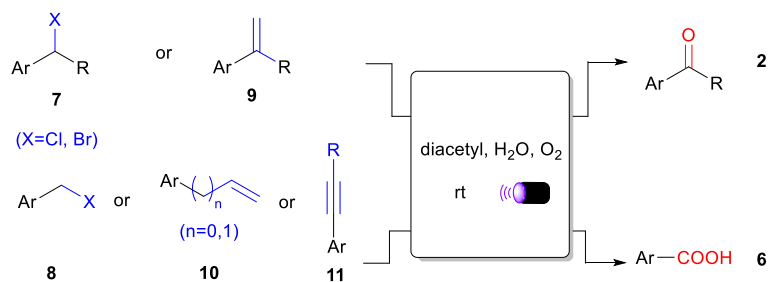

A similar procedure was carried out for the oxidation of **7/8/9/10/11** (0.15 mmol) to afford products **2/6** after 36–48 h in yields as indicated in Table 3.

A similar procedure was carried out for the scale-up oxidation of **1a** (8 mmol) to afford 0.851 g of **2a** in a yield of 53% (Scheme 2).

#### (2) General procedure for the oxidation of benzylic alcohols

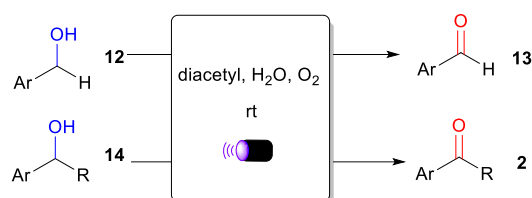

To a 10 mL quartz tube charged with a magnetic stir bar was added **12** or **14** (0.15 mmol), diacetyl (0.6 mmol, 4 equiv, 52  $\mu$ L), and H<sub>2</sub>O (0.6 mL). The mixture was bubbled with O<sub>2</sub> for 15 min and then irradiated

by purple LEDs (420 nm, 20 W) with vigorous stirring at room temperature. After 12-36 h, the solution was extracted with EtOAc (3 mL×3). The combined organic layers were washed with brine (2 mL), dried with anhydrous Na<sub>2</sub>SO<sub>4</sub>, and purified by column chromatography with petroleum ether/EtOAc (100:0–2:1) to afford products **13** or **2** in yields as indicated in Table 4.

A similar procedure was carried out for the scale-up oxidation of **14b/14d/14x** (7 mmol/6.5 mmol/5.0 mmol) to afford corresponding products in yields as indicated in Scheme 2.

### (3) General procedure for the oxidation of aliphatic alcohols

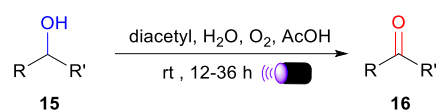

To a 10 mL quartz tube charged with a magnetic stir bar was added **15** (0.15 mmol), diacetyl (1.2 mmol, 8 equiv, 105  $\mu$ L), H<sub>2</sub>O (0.6 mL) and CH<sub>3</sub>COOH (0.75 mmol, 5 equiv). The mixture was bubbled with O<sub>2</sub> for 15 min and then irradiated by purple LEDs (420 nm, 20 W) with vigorous stirring at room temperature.

After 12-36 h, the solution was extracted with EtOAc (3 mL×3). The combined organic layers were washed with brine (2 mL), dried with anhydrous Na<sub>2</sub>SO<sub>4</sub>, and purified by column chromatography with petroleum ether/EtOAc (100:0–2:1) to afford products **16** in yields as indicated in Table 4.

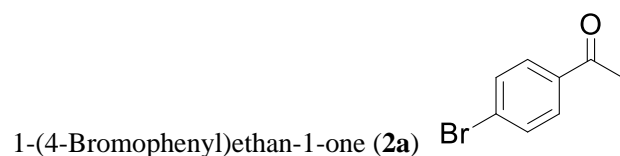

Yield 81%, 24.2 mg from **1a** in Table 1 (24 h), or yield 89%, 26.7 mg from **14a** in Table 4 (12 h), or yield 53%, 851 mg from **1a** (5 mmol) in Scheme 2 (48 h), white solid, m.p. 78.1 – 80.2°C. <sup>1</sup>H NMR (400 MHz, CDCl<sub>3</sub>)  $\delta$  7.79 (d, *J* = 8.6 Hz, 2H), 7.57 (d, *J* = 8.6 Hz, 2H), 2.56 (s, 3H). <sup>13</sup>C NMR (100 MHz, CDCl<sub>3</sub>)  $\delta$  197.1, 135.8, 131.9, 129.9, 128.4, 26.6.<sup>1</sup>

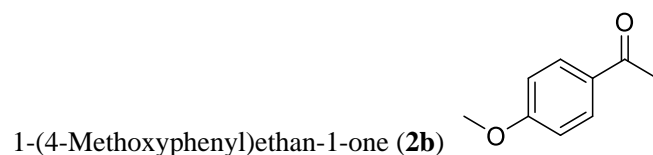

Yield 69%, 15.6 mg from **1b** in Table 2 (36 h), or yield 85%, 19.4 mg from **14b** in Table 4 (24 h), or yield 86%, 899 mg from **14b** (7 mmol) in Scheme 2 (12 h), white solid, m.p. 36.2 – 37.5 °C. <sup>1</sup>H NMR (400 MHz, CDCl<sub>3</sub>)  $\delta$  7.91 (d, *J* = 8.9 Hz, 2H), 6.91 (d, *J* = 8.9 Hz, 2H), 3.84 (s, 3H), 2.53 (s, 3H). <sup>13</sup>C NMR (100 MHz, CDCl<sub>3</sub>)  $\delta$  196.9, 163.5, 130.6, 130.3, 113.7, 55.5, 26.4.<sup>1</sup>

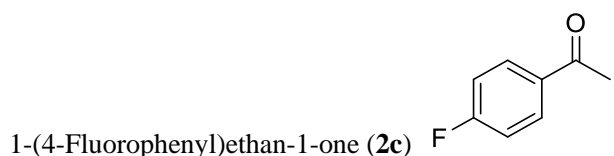

Yield 81%, 16.8 mg from **1c** in Table 2 (36 h, 2.1 mg, 11% of **1c** was recovered), or yield 69%, 14.2 mg from **9a** in Table 3 (36 h), or yield 89%, 18.5 mg from **14c** in Table 4 (24 h), colorless liquid. <sup>1</sup>H NMR (400 MHz, CDCl<sub>3</sub>) 7.97 (dd, *J* = 8.8, 5.4 Hz, 2H), 7.13 (t, *J* = 8.9 Hz, 2H), 2.58 (s, 3H). <sup>13</sup>C NMR (100 MHz, CDCl<sub>3</sub>) 196.7, 165.8 (d, *J* = 254.7 Hz), 133.6, 131.1 (d, *J* = 9.4 Hz), 115.8 (d, *J* = 22.0 Hz), 26.7.<sup>1</sup>

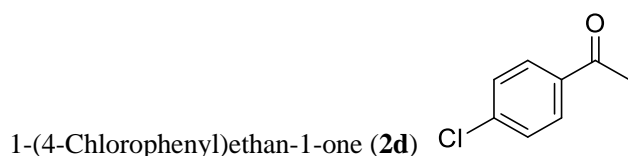

Yield 86%, 20.1 mg from **1d** in Table 2 (36 h), or yield 86%, 19.9 mg from **14d** in Table 4 (24 h), or yield 74%, 757 mg from **14d** (6.5 mmol) in Scheme 2 (24 h), white solid, m.p. 17.8 – 18.0 °C. <sup>1</sup>H NMR (400 MHz, CDCl<sub>3</sub>) δ 7.89 (d, *J* = 8.8 Hz, 2H), 7.43 (d, *J* = 8.9 Hz, 2H), 2.59 (s, 3H). <sup>13</sup>C NMR (100 MHz, CDCl<sub>3</sub>) δ 197.0, 139.7, 135.5, 129.9, 129.0, 26.7.<sup>2</sup>

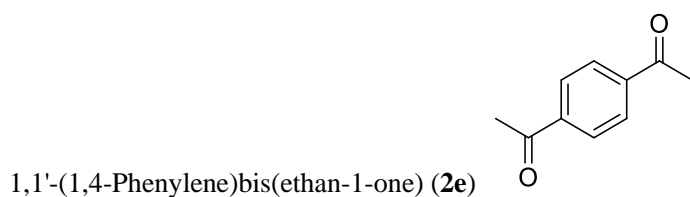

Yield 53%, 12.5 mg from **1e** in Table 2 (36 h, 7.8 mg, 35% of **1e** was recovered), white solid, m.p. 111.3 – 112.6 °C. <sup>1</sup>H NMR (400 MHz, CDCl<sub>3</sub>) δ 8.03 (s, 4H), 2.65 (s, 6H). <sup>13</sup>C NMR (100 MHz, CDCl<sub>3</sub>) δ 197.7, 140.3, 128.6, 27.1.<sup>2</sup>

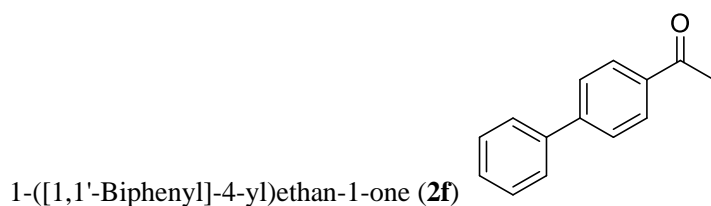

Yield 51%, 15.2 mg from **1f** in Table 2 (36 h), colorless liquid. <sup>1</sup>H NMR (400 MHz, CDCl<sub>3</sub>) δ 8.04 (d, *J* = 8.4 Hz, 2H), 7.69 (d, *J* = 8.5 Hz, 2H), 7.63 (d, *J* = 6.9 Hz, 2H), 7.48 (t, *J* = 8.0 Hz, 2H), 7.42 (t, *J* = 7.0 Hz, 1H), 2.64 (s, 3H). <sup>13</sup>C NMR (100 MHz, CDCl<sub>3</sub>) δ 197.9, 145.8, 139.9, 135.9, 129.0, 129.0, 128.3, 127.4, 127.3, 26.8.<sup>2</sup>

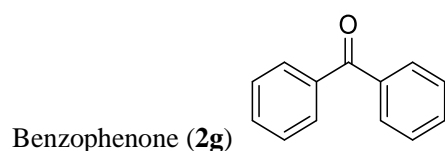



Yield 78%, 21.4 mg from **1g** in Table 2 (36 h), or yield 90%, 24.5 mg from **7a** in Table 3 (36 h), or yield 87%, 23.8 mg from **7b** in Table 3 (36 h), or yield 92%, 25.0 mg from **9b** in Table 3 (36 h), or yield 83%, 22.7 mg from **14g** in Table 4 (24 h), white solid, m.p. 47.8 – 48.5 °C. <sup>1</sup>H NMR (400 MHz, CDCl<sub>3</sub>) 7.81 (d, *J* = 7.0 Hz, 4H), 7.64 – 7.56 (m, 2H), 7.49 (t, *J* = 7.5 Hz, 4H). <sup>13</sup>C NMR (100 MHz, CDCl<sub>3</sub>) δ 196.9, 137.7, 132.6, 130.2, 128.4.<sup>1</sup>

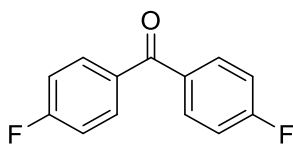

Bis(4-fluorophenyl)methanone (**2h**)

Yield 89%, 29 mg from **1h** in Table 2 (36 h), or yield 93%, 30.6 mg from **7d** in Table 3 (36 h), or yield 91%, 29.9 mg from **14h** in Table 4 (24 h), white solid, m.p. 104.1 – 104.3 °C. <sup>1</sup>H NMR (400 MHz, CDCl<sub>3</sub>) δ 7.84 – 7.79 (m, 4H), 7.17 (t, *J* = 8.6 Hz, 4H). <sup>13</sup>C NMR (100 MHz, CDCl<sub>3</sub>) δ 194.0, 165.5 (d, *J* = 254.4 Hz), 133.8 (d, *J* = 3.1 Hz), 132.6 (d, *J* = 9.2 Hz), 115.7 (d, *J* = 21.9 Hz).<sup>1</sup>

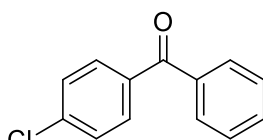

(4-Chlorophenyl)(phenyl)methanone (**2i**)

Yield 90%, 29.4 mg from **1i** in Table 2 (36 h), or yield 93%, 30.2 mg from **7c** in Table 3 (36 h), white solid, m.p. 80.0 – 82.4 °C. <sup>1</sup>H NMR (400 MHz, CDCl<sub>3</sub>) δ 7.80 – 7.71 (m, 4H), 7.59 (t, *J* = 7.4 Hz, 1H), 7.52 – 7.42 (m, 4H). <sup>13</sup>C NMR (100 MHz, CDCl<sub>3</sub>) δ 195.6, 138.9, 137.3, 135.9, 132.7, 131.6, 130.0, 128.7, 128.5.<sup>1</sup>

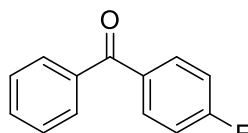

(4-Fluorophenyl)(phenyl)methanone (**2j**)

Yield 94%, 28.4 mg from **1j** in Table 2 (36 h), white solid, m.p. 46.2 – 48.2 °C. <sup>1</sup>H NMR (400 MHz, CDCl<sub>3</sub>) δ 7.80 – 7.71 (m, 4H), 7.62 – 7.56 (m, 1H), 7.52 – 7.41 (m, 4H). <sup>13</sup>C NMR (100 MHz, CDCl<sub>3</sub>) δ 195.4, 165.5 (d, *J* = 254.1 Hz), 137.6, 133.9 (d, *J* = 3.0 Hz), 132.8 (d, *J* = 9.2 Hz), 132.6, 130.0, 128.5, 115.6 (d, *J* = 21.8 Hz).<sup>1</sup>

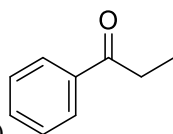

Propiophenone (**2k**)

Yield 78%, 16.3 mg from **1k** in Table 2 (36 h), or yield 90%, 18.1 mg from **14k** in Table 4 (24 h), yellow liquid. <sup>1</sup>H NMR (400 MHz, CDCl<sub>3</sub>) δ 7.97 (d, *J* = 7.1 Hz, 2H), 7.54 (d, *J* = 7.3 Hz, 1H), 7.46 (t, *J* = 7.5 Hz,

2H), 3.01 (q,  $J = 7.2$  Hz, 2H), 1.23 (t,  $J = 7.3$  Hz, 3H).  $^{13}\text{C}$  NMR (100 MHz,  $\text{CDCl}_3$ )  $\delta$  201.0, 137.0, 133.0, 128.7, 128.1, 31.9, 8.4.<sup>1</sup>

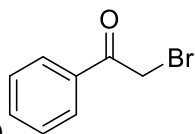

2-Bromo-1-phenylethan-1-one (**2l**)

Yield 61%, 18.1 mg from **1l** in Table 2 (36 h), white solid, m.p. 49.6 – 50.7 °C.  $^1\text{H}$  NMR (400 MHz,  $\text{CDCl}_3$ )  $\delta$  7.97 (d,  $J = 7.0$  Hz, 2H), 7.60 (t,  $J = 7.4$  Hz, 1H), 7.48 (t,  $J = 7.7$  Hz, 2H), 4.46 (s, 2H).  $^{13}\text{C}$  NMR (100 MHz,  $\text{CDCl}_3$ )  $\delta$  191.3, 134.0, 133.9, 129.0, 128.9, 31.2.<sup>2</sup>

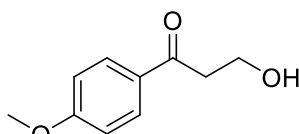

3-Hydroxy-1-(4-methoxyphenyl)propan-1-one (**2m**)

Yield 57%, 15.3 mg from **1m** in Table 2 (36 h using 0.60 mmol diacetyl), colorless liquid.  $^1\text{H}$  NMR (400 MHz,  $\text{CDCl}_3$ ) 7.94 (d,  $J = 8.9$  Hz, 2H), 6.94 (d,  $J = 8.9$  Hz, 2H), 4.01 (t,  $J = 5.3$  Hz, 2H), 3.87 (s, 3H), 3.18 (t,  $J = 5.3$  Hz, 2H), 2.51 (s, 1H).  $^{13}\text{C}$  NMR (100 MHz,  $\text{CDCl}_3$ )  $\delta$  199.3, 163.9, 130.5, 129.8, 113.9, 58.4, 55.6, 40.0.<sup>3</sup>

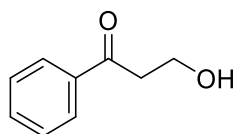

3-Hydroxy-1-phenylpropan-1-one (**2n**)

Yield 32%, 7.1 mg from **1n** in Table 2 (36 h), colorless liquid (11.3 mg **1n** was recovered).  $^1\text{H}$  NMR (400 MHz,  $\text{CDCl}_3$ )  $\delta$  7.97 (d,  $J = 6.9$  Hz, 2H), 7.59 (t,  $J = 7.4$  Hz, 1H), 7.48 (t,  $J = 7.8$  Hz, 2H), 4.04 (t,  $J = 5.3$  Hz, 2H), 3.24 (t,  $J = 5.3$  Hz, 2H), 2.40 (s, 1H).  $^{13}\text{C}$  NMR (100 MHz,  $\text{CDCl}_3$ )  $\delta$  200.7, 136.7, 133.7, 128.8, 128.2, 58.2, 40.5.<sup>2</sup>

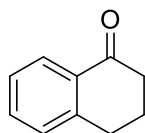

3,4-Dihydronaphthalen-1(2H)-one (**2o**)

Yield 87%, 19 mg from **1o** in Table 2 (36 h), or yield 79%, 17.4 mg from **14o** in Table 4 (24 h), yellow liquid.  $^1\text{H}$  NMR (400 MHz,  $\text{CDCl}_3$ )  $\delta$  8.03 (d,  $J = 7.8$  Hz, 1H), 7.47 (t,  $J = 7.5$  Hz, 1H), 7.29 (d,  $J = 7.0$  Hz, 1H), 7.25 (d,  $J = 7.0$  Hz, 1H), 2.97 (t,  $J = 6.1$  Hz, 2H), 2.69 – 2.61 (m, 2H), 2.17 – 2.11 (m, 2H).  $^{13}\text{C}$  NMR (100 MHz,  $\text{CDCl}_3$ )  $\delta$  198.6, 144.6, 133.5, 132.7, 128.9, 127.3, 126.8, 39.3, 29.8, 23.4.<sup>1</sup>

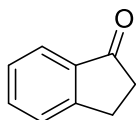

2,3-Dihydro-1H-inden-1-one (**2p**)

Yield 80%, 15.8 mg from **1p** in Table 2 (36 h), or yield 73%, 14.4 mg from **14p** in Table 4 (24 h), yellowish-brown solid, m.p. 39.0 – 40.2 °C. <sup>1</sup>H NMR (400 MHz, CDCl<sub>3</sub>) δ 7.75 (d, *J* = 7.6 Hz, 1H), 7.61 – 7.55 (m, 1H), 7.48 (d, *J* = 7.7 Hz, 1H), 7.39 – 7.34 (m, 1H), 3.17 – 3.12 (m, 2H), 2.72 – 2.66 (m, 2H). <sup>13</sup>C NMR (100 MHz, CDCl<sub>3</sub>) δ 207.3, 155.3, 137.2, 134.7, 127.4, 126.8, 123.8, 36.3, 25.9.<sup>4</sup>

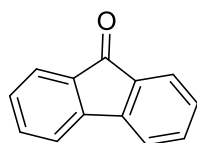

9H-Fluoren-9-one (**2q**)

Yield 42%, 11.3 mg from **1q** in Table 2 (36 h in the solvent of CH<sub>3</sub>CN, 11.3 mg, 42% of **1q** was recovered), or yield 44%, 11.9 mg from **7f** in Table 3 (36 h, 13.8 mg, 51% of **7f** was recovered), or yield 67%, 18.0 mg from **14q** in Table 4 (36 h), yellow solid, m.p. 83.0 – 83.8 °C. <sup>1</sup>H NMR (400 MHz, CDCl<sub>3</sub>) δ 7.64 (d, *J* = 7.0 Hz, 2H), 7.50 – 7.44 (m, 4H), 7.31 – 7.25 (m, 2H). <sup>13</sup>C NMR (100 MHz, CDCl<sub>3</sub>) δ 193.9, 144.4, 134.7, 134.1, 129.1, 124.3, 120.3.<sup>1</sup>

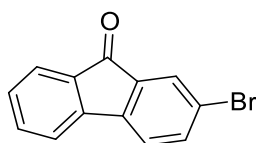

2-Bromo-9H-fluoren-9-one (**2r**)

Yield 44%, 17.2 mg from **1r** in Table 2 (36 h in the solvent of CH<sub>3</sub>CN), yellow solid, m.p. 147.1 – 148.1 °C. <sup>1</sup>H NMR (400 MHz, CDCl<sub>3</sub>) 7.69 (d, *J* = 1.9 Hz, 1H), 7.63 – 7.52 (m, 2H), 7.49 – 7.43 (m, 2H), 7.35 – 7.27 (m, 2H). <sup>13</sup>C NMR (100 MHz, CDCl<sub>3</sub>) δ 192.6, 143.8, 143.1, 137.2, 135.8, 135.2, 133.8, 129.6, 127.7, 124.8, 123.0, 121.9, 120.6.<sup>5</sup>

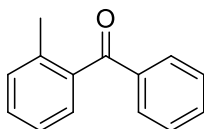

1-Benzyl-2-methylbenzene (**2s**)

Yield 65%, 19.2 mg from **7e** in Table 3 (36 h), colorless liquid. <sup>1</sup>H NMR (400 MHz, CDCl<sub>3</sub>) δ 7.82 – 7.79 (m, 2H), 7.60 – 7.55 (m, 1H), 7.47 – 7.43 (m, 2H), 7.41 – 7.37(m, 1H), 7.33 – 7.22 (m, 3H), 2.34 (s, 3H). <sup>13</sup>C NMR (100 MHz, CDCl<sub>3</sub>) δ 198.7, 138.6, 137.8, 136.8, 133.2, 131.1, 130.3, 130.2, 128.6, 128.5, 125.3, 20.1.<sup>4</sup>

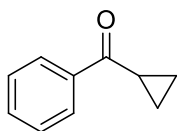

Cyclopropyl phenyl ketone (**2t**)

Yield 63%, 13.8 mg from **9c** in Table 3 (36 h), colorless liquid. <sup>1</sup>H NMR (400 MHz, CDCl<sub>3</sub>) δ 8.05 – 7.95 (m, 2H), 7.57 – 7.49 (m, 1H), 7.43 (t, *J* = 8.1 Hz, 2H), 2.67 – 2.61 (m, 1H), 1.23 – 1.20 (m, 2H), 1.04 – 0.98 (m, 2H). <sup>13</sup>C NMR (100 MHz, CDCl<sub>3</sub>) δ 200.4, 137.8, 132.6, 128.4, 127.9, 17.0, 11.5.<sup>6</sup>

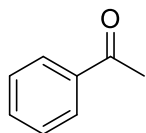

Acetophenone (**2v**)

Yield 81%, 14.5 mg from **14v** in Table 4 (24 h), colorless liquid. <sup>1</sup>H NMR (400 MHz, CDCl<sub>3</sub>) δ 7.96 (d, *J* = 7.0 Hz, 2H), 7.57 (t, *J* = 7.4 Hz, 1H), 7.47 (t, *J* = 7.5 Hz, 2H), 2.61 (s, 3H). <sup>13</sup>C NMR (100 MHz, CDCl<sub>3</sub>) δ 198.4, 137.2, 133.3, 128.7, 128.4, 26.8.<sup>1</sup>

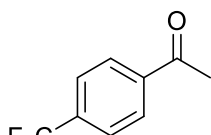

1-(4-(Trifluoromethyl)phenyl)ethan-1-one (**2w**)

Yield 82%, 23.1 mg from **14w** in Table 4 (36 h), white solid, m.p. 30.5 – 31.4 °C. <sup>1</sup>H NMR (400 MHz, CDCl<sub>3</sub>) δ 8.05 (d, *J* = 8.7 Hz, 2H), 7.72 (d, *J* = 8.1 Hz, 2H), 2.64 (s, 3H). <sup>13</sup>C NMR (100 MHz, CDCl<sub>3</sub>) δ 197.2, 139.7, 134.5 (q, *J* = 32.8 Hz), 128.8, 125.7 (q, *J* = 3.7 Hz), 122.4 (q, *J* = 272.6 Hz), 26.9.<sup>1</sup>

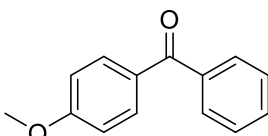

(4-Methoxyphenyl)(phenyl)methanone (**2x**)

Yield 92%, 29.1 mg from **14x** in Table 4 (24 h), or yield 88%, 932.8 mg from **14x** (5 mmol) in Scheme 2 (24 h), white solid, m.p. 60.7 – 61.5 °C. <sup>1</sup>H NMR (400 MHz, CDCl<sub>3</sub>) δ 7.83 (d, *J* = 8.8 Hz, 2H), 7.76 (d, *J* = 6.9 Hz, 2H), 7.56 (d, *J* = 7.4 Hz, 1H), 7.47 (t, *J* = 7.5 Hz, 2H), 6.96 (d, *J* = 8.8 Hz, 2H), 3.89 (s, 3H). <sup>13</sup>C NMR (100 MHz, CDCl<sub>3</sub>) δ 195.7, 163.3, 138.4, 132.7, 132.0, 130.2, 129.9, 128.3, 113.6, 55.6.<sup>1</sup>

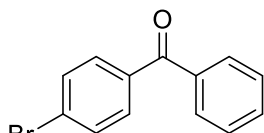

4-Bromobenzophenone (**2y**)

Yield 81%, 31.8 mg from **14y** in Table 4 (24 h), white solid, m.p. 79.6 – 79.8 °C. <sup>1</sup>H NMR (400 MHz, CDCl<sub>3</sub>) δ 7.77 (d, *J* = 6.9 Hz, 2H), 7.68 (d, *J* = 8.6 Hz, 2H), 7.64 (s, 2H), 7.60 (d, *J* = 7.5 Hz, 1H), 7.49 (t, *J*

= 7.6 Hz, 2H).  $^{13}\text{C}$  NMR (100 MHz,  $\text{CDCl}_3$ )  $\delta$  195.8, 137.2, 136.4, 132.8, 131.8, 131.7, 130.1, 128.6, 127.7.<sup>7</sup>

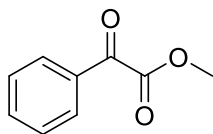

Methyl-2-oxo-2-phenylacetate (**2z**)

Yield 80%, 19.7 mg from **14z** in Table 4 (24 h), colorless liquid.  $^1\text{H}$  NMR (400 MHz,  $\text{CDCl}_3$ )  $\delta$  8.02 (d,  $J$  = 6.6 Hz, 2H), 7.67 (t,  $J$  = 7.4 Hz, 1H), 7.53 (d,  $J$  = 8.2 Hz, 2H), 3.98 (s, 3H).  $^{13}\text{C}$  NMR (100 MHz,  $\text{CDCl}_3$ )  $\delta$  186.2, 164.2, 135.2, 132.5, 130.2, 129.0, 53.0.<sup>8</sup>

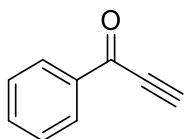

1-Phenyl-2-propyn-1-one (**2aa**)

Yield 66%, 12.8 mg from **14aa** in Table 4 (30 h), yellow solid, m.p. 50.1 – 51.3 °C.  $^1\text{H}$  NMR (400 MHz,  $\text{DMSO-}d_6$ )  $\delta$  8.09 (dd,  $J$  = 8.4, 1.4 Hz, 2H), 7.80 – 7.71 (m, 1H), 7.62 (d,  $J$  = 8.1 Hz, 2H), 5.12 (s, 1H).  $^{13}\text{C}$  NMR (100 MHz,  $\text{DMSO-}d_6$ )  $\delta$  177.1, 135.7, 135.0, 129.3, 129.2, 85.6, 80.3.<sup>9</sup>

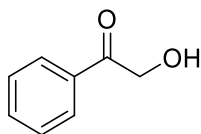

2-Hydroxyacetophenone (**2ab**)

Yield 91%, 18.3 mg from **14ab** in Table 4 (36 h), white solid, m.p. 87.2 – 88.8 °C.  $^1\text{H}$  NMR (400 MHz,  $\text{CDCl}_3$ )  $\delta$  7.93 (d,  $J$  = 6.6 Hz, 2H), 7.63 (q,  $J$  = 7.6 Hz, 1H), 7.55 – 7.45 (m, 2H), 4.90 (s, 2H), 3.55 (s, 1H).  $^{13}\text{C}$  NMR (100 MHz,  $\text{CDCl}_3$ )  $\delta$  198.5, 134.47, 133.4, 129.1, 127.8, 65.6.<sup>10</sup>

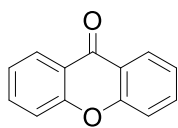

9H-Xanthen-9-one (**2ac**)

Yield 90%, 26.6 mg from **14ac** in Table 4 (36 h), white solid, m.p. 172.5 – 173.8 °C.  $^1\text{H}$  NMR (400 MHz,  $\text{CDCl}_3$ )  $\delta$  8.34 (d,  $J$  = 8.0 Hz, 2H), 7.76 – 7.69 (m, 2H), 7.49 (d,  $J$  = 8.5 Hz, 2H), 7.38 (t,  $J$  = 7.5 Hz, 2H).  $^{13}\text{C}$  NMR (100 MHz,  $\text{CDCl}_3$ )  $\delta$  177.4, 156.3, 135.0, 126.8, 124.0, 121.9, 118.1.<sup>1</sup>

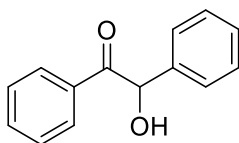

2-Hydroxy-1,2-diphenylethan-1-one (**2ad**)

Yield 80%, 25.1 mg from **14ad** in Table 4 (36 h), white solid, m.p. 136.2 – 137.5 °C. <sup>1</sup>H NMR (400 MHz, CDCl<sub>3</sub>) δ 7.92 (d, *J* = 7.3 Hz, 2H), 7.52 (t, *J* = 7.4 Hz, 1H), 7.744 – 7.26 (m, 7H), 5.96 (s, 1H), 4.59 (s, 1H). <sup>13</sup>C NMR (100 MHz, CDCl<sub>3</sub>) δ 199.0, 139.1, 134.1, 133.5, 129.3, 129.3, 128.8, 128.7, 127.9, 76.3.<sup>11</sup>

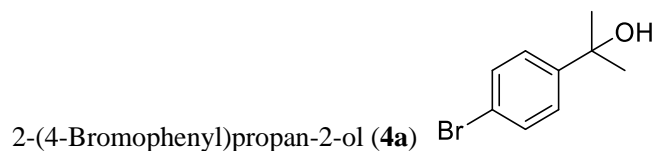

Yield 71%, 23 mg from **3a** in Table 2 (36 h), white solid, m.p. 45.3 – 46.4 °C. <sup>1</sup>H NMR (400 MHz, CDCl<sub>3</sub>) δ 7.45 (d, *J* = 8.6 Hz, 2H), 7.36 (d, *J* = 8.7 Hz, 2H), 1.81 (s, 1H), 1.56 (s, 6H). <sup>13</sup>C NMR (100 MHz, CDCl<sub>3</sub>) δ 148.2, 131.4, 126.5, 120.7, 72.4, 31.8.<sup>12</sup>

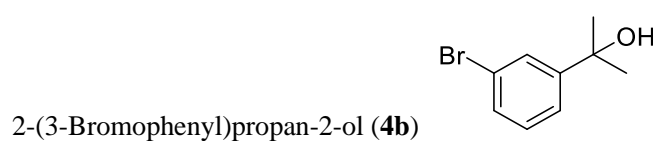

Yield 63%, 20.4 mg from **3b** in Table 2 (36 h), colorless liquid. <sup>1</sup>H NMR (400 MHz, CDCl<sub>3</sub>) δ 7.65 (s, 1H), 7.43 – 7.35 (m, 2H), 7.21 (t, *J* = 8.0 Hz, 1H), 1.74 (s, 1H), 1.57 (s, 6H). <sup>13</sup>C NMR (100 MHz, CDCl<sub>3</sub>) δ 151.6, 130.0, 129.9, 127.9, 123.2, 122.6, 72.4, 31.8.<sup>13</sup>

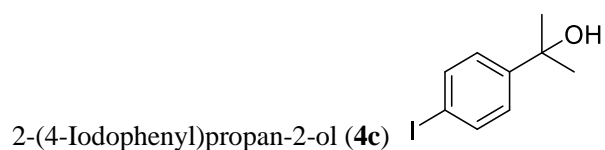

Yield 47%, 18.6 mg from **3c** in Table 2 (36 h), yellow liquid. <sup>1</sup>H NMR (400 MHz, CDCl<sub>3</sub>) δ 7.66 (d, *J* = 8.6 Hz, 2H), 7.24 (d, *J* = 8.6 Hz, 2H), 1.80 (s, 1H), 1.55 (s, 6H). <sup>13</sup>C NMR (100 MHz, CDCl<sub>3</sub>) δ 148.9, 137.4, 126.7, 92.3, 72.5, 31.8.<sup>12</sup>

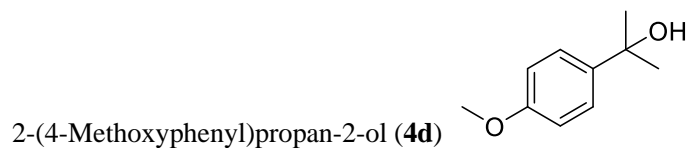

Yield 66%, 16.4 mg from **3d** in Table 2 (36 h), yellow liquid. <sup>1</sup>H NMR (400 MHz, CDCl<sub>3</sub>) δ 7.42 (d, *J* = 8.3 Hz, 2H), 6.87 (d, *J* = 8.6 Hz, 2H), 3.80 (s, 3H), 1.73 (s, 1H), 1.57 (s, 6H). <sup>13</sup>C NMR (100 MHz, CDCl<sub>3</sub>) δ 158.4, 141.4, 125.7, 113.6, 72.4, 55.5, 31.9.<sup>14</sup>

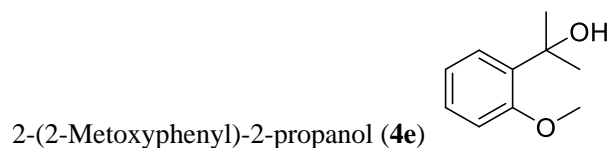

Yield 41%, 10.1 mg from **3e** in Table 2 (36 h), colorless liquid.  $^1\text{H NMR}$  (400 MHz,  $\text{CDCl}_3$ )  $\delta$  7.31 (d,  $J = 7.7$  Hz, 1H), 7.25 – 7.22 (m, 1H), 6.98 – 6.91 (m, 2H), 3.92 (s, 3H), 1.61 (s, 6H).  $^{13}\text{C NMR}$  (100 MHz,  $\text{CDCl}_3$ )  $\delta$  157.0, 135.8, 128.3, 125.9, 121.1, 111.4, 72.7, 55.4, 29.8.<sup>15</sup>

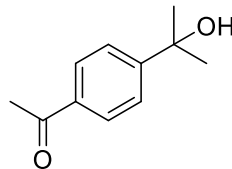

1-(4-(2-Hydroxypropan-2-yl)phenyl)ethan-1-one (**4f**)

Yield 50%, 13.4 mg from **3f** in Table 2 (36 h), white solid, m.p. 85.1 – 85.7 °C.  $^1\text{H NMR}$  (400 MHz,  $\text{CDCl}_3$ )  $\delta$  7.93 (d,  $J = 8.4$  Hz, 2H), 7.58 (d,  $J = 7.0$  Hz, 2H), 2.60 (s, 3H), 1.85 (s, 1H), 1.60 (s, 6H).  $^{13}\text{C NMR}$  (100 MHz,  $\text{CDCl}_3$ )  $\delta$  198.0, 154.6, 135.7, 128.5, 124.9, 72.7, 31.8, 26.9.<sup>12</sup>

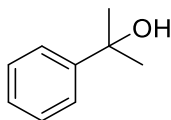

2-Phenylpropan-2-ol (**4g**)

Yield 50%, 10.1 mg from **3g** in Table 2 (36 h), white solid, m.p. 30.5 – 31.4 °C.  $^1\text{H NMR}$  (400 MHz,  $\text{CDCl}_3$ )  $\delta$  7.51 (d,  $J = 8.6$  Hz, 2H), 7.36 (t,  $J = 7.6$  Hz, 2H), 7.26 (t,  $J = 7.3$  Hz, 1H), 2.11 (s, 1H), 1.59 (s, 6H).  $^{13}\text{C NMR}$  (100 MHz,  $\text{CDCl}_3$ )  $\delta$  149.2, 128.4, 126.8, 124.5, 72.7, 31.9.<sup>13</sup>

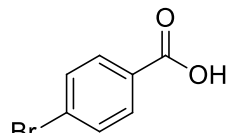

4-Bromobenzoic acid (**6a**)

Yield 35%, 10.5 mg from **5a** in Table 2 (36 h, 11.0 mg, 43% of **5a** was recovered), white solid, m.p. 253.2 – 254.3 °C.  $^1\text{H NMR}$  (400 MHz,  $\text{DMSO}-d_6$ )  $\delta$  13.16 (s, 1H), 7.86 (d,  $J = 8.5$  Hz, 2H), 7.71 (d,  $J = 8.5$  Hz, 2H).  $^{13}\text{C NMR}$  (100 MHz,  $\text{DMSO}-d_6$ )  $\delta$  166.4, 131.5, 131.1, 129.8, 126.7.<sup>2</sup>

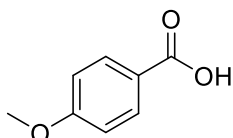

4-Methoxybenzoic acid (**6b**)

Yield 89%, 20.3 mg from **5b** in Table 2 (36 h), or yield 44%, 9.9 mg from **10b** in Table 3 (36 h), or yield 61%, 13.7 mg from **11a** in Table 3 (36 h), white solid, m.p. 183.1 – 184.4 °C.  $^1\text{H NMR}$  (400 MHz,  $\text{DMSO}-d_6$ )  $\delta$  12.64 (s, 1H), 7.89 (d,  $J = 6.9$  Hz, 2H), 7.01 (d,  $J = 9.0$  Hz, 2H), 3.81 (s, 3H).  $^{13}\text{C NMR}$  (100 MHz,  $\text{DMSO}-d_6$ )  $\delta$  167.1, 162.9, 131.4, 123.0, 113.9, 55.5.<sup>2</sup>

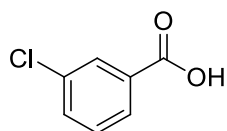

3-Chlorobenzoic acid (**6c**)

Yield 63%, 14.8 mg from **5c** in Table 2 (36 h), white solid, m.p. 156.2 – 157.0 °C. <sup>1</sup>H NMR (400 MHz, DMSO-*d*<sub>6</sub>) δ 7.90 – 7.88 (m, 2H), 7.69 (d, *J* = 8.7 Hz, 1H), 7.54 (t, *J* = 8.1 Hz, 1H). <sup>13</sup>C NMR (100 MHz, DMSO-*d*<sub>6</sub>) δ 165.9, 133.1, 133.0, 132.4, 130.4, 128.6, 127.7.<sup>2</sup>

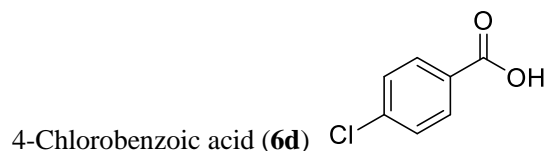

Yield 49%, 11.5 mg from **5d** in Table 2 (36 h), white solid, m.p. 241.3 – 242.0 °C. <sup>1</sup>H NMR (400 MHz, DMSO-*d*<sub>6</sub>) δ 13.22 (s, 1H), 7.94 (d, *J* = 8.5 Hz, 2H), 7.57 (d, *J* = 8.4 Hz, 2H). <sup>13</sup>C NMR (100 MHz, DMSO-*d*<sub>6</sub>) δ 166.6, 137.8, 131.2, 129.7, 128.8.<sup>2</sup>

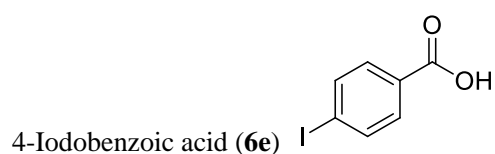

Yield 67%, 25.1 mg from **5e** in Table 2 (36 h), white solid, m.p. 272.0 – 273.3 °C. <sup>1</sup>H NMR (400 MHz, DMSO-*d*<sub>6</sub>) δ 7.88 (d, *J* = 8.4 Hz, 2H), 7.69 (d, *J* = 8.3 Hz, 2H). <sup>13</sup>C NMR (100 MHz, DMSO-*d*<sub>6</sub>) δ 166.8, 137.3, 130.8, 130.2, 100.9.<sup>16</sup>

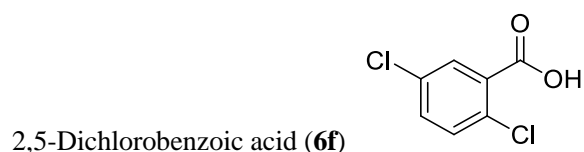

Yield 51%, 14.5 mg from **5f** in Table 2 (36 h), white solid, m.p. 151.1 – 152.3 °C. <sup>1</sup>H NMR (400 MHz, DMSO-*d*<sub>6</sub>) δ 13.70 (s, 1H), 7.90 – 7.88 (m, 1H), 7.56 – 7.50 (m, 2H). <sup>13</sup>C NMR (100 MHz, DMSO-*d*<sub>6</sub>) δ 165.6, 133.2, 132.45, 132.36, 131.9, 130.5, 130.4.<sup>17</sup>

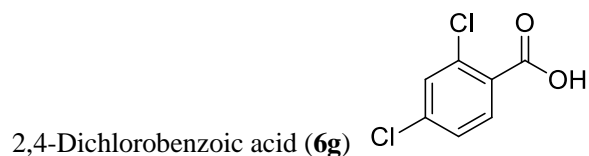

Yield 31%, 11.7 mg from **5g** in Table 2 (36 h, 11.7 mg, 48% of **5g** was recovered), white solid, m.p. 158.3 – 159.7 °C. <sup>1</sup>H NMR (400 MHz, DMSO-*d*<sub>6</sub>) δ 7.80 (d, *J* = 8.4 Hz, 1H), 7.72 (d, *J* = 2.1 Hz, 1H), 7.52 (dd, *J* = 8.4, 2.1 Hz, 1H). <sup>13</sup>C NMR (100 MHz, DMSO-*d*<sub>6</sub>) δ 166.0, 136.4, 133.0, 132.3, 130.6, 130.2, 127.5.<sup>17</sup>

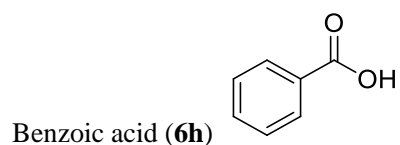



Yield 86%, 9.9 mg from **8a** in Table 3 (36 h), or yield 61%, 13.7 mg from **10a** in Table 3 (24 h), or yield 65%, 9.9 mg from **11d** in Table 3 (36 h), or yield 24%, 20.3 mg from **11e** in Table 3 (48 h in the solvent of CH<sub>3</sub>CN and H<sub>2</sub>O), white solid, m.p. 183.1 – 184.4 °C. <sup>1</sup>H NMR (400 MHz, CDCl<sub>3</sub>) δ 12.59 (s, 1H), 8.15 (d, *J* = 7.3 Hz, 2H), 7.63 (t, *J* = 7.7 Hz, 1H), 7.49 (t, *J* = 7.7 Hz, 2H). <sup>13</sup>C NMR (100 MHz, CDCl<sub>3</sub>) δ 172.8, 134.0, 130.4, 129.4, 128.6.<sup>1</sup>

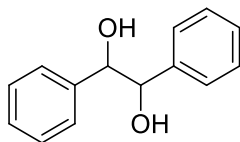

1,2-Diphenylethane-1,2-diol (**6h'**)

Yield 49%, 15.8 mg from **11e** in Table 3 (36 h), white solid, m.p. 132.7 – 135.2 °C. <sup>1</sup>H NMR (400 MHz, CDCl<sub>3</sub>) δ 7.35 – 7.29 (m, 6H), 7.27 – 7.23 (m, 4H), 4.83 (s, 2H), 2.00 (s, 2H). <sup>13</sup>C NMR (100 MHz, CDCl<sub>3</sub>) δ 139.8, 128.4, 128.3, 127.2, 78.2.<sup>18</sup>

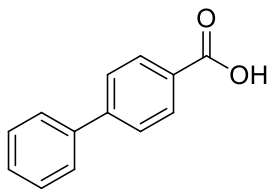

[1,1'-Biphenyl]-4-carboxylic acid (**6i**)

Yield 24%, 9.5 mg from **8b** in Table 3 (48 h in the solvent of CH<sub>3</sub>CN, 21.1 mg, 57% of **8b** was recovered), or yield 68%, 20.3 mg from **11c** in Table 3 (48 h in the solvent of CH<sub>3</sub>CN), white solid, m.p. 224.3 – 225.2 °C. <sup>1</sup>H NMR (400 MHz, DMSO-*d*<sub>6</sub>) δ 8.03 (d, *J* = 7.8 Hz, 2H), 7.75 (dd, *J* = 26.9, 7.8 Hz, 4H), 7.48 (t, *J* = 7.6 Hz, 2H), 7.40 (t, *J* = 7.4 Hz, 1H). <sup>13</sup>C NMR (100 MHz, DMSO-*d*<sub>6</sub>) δ 167.0, 144.1, 138.8, 129.8, 129.4, 128.9, 128.1, 126.7, 126.6.<sup>2</sup>

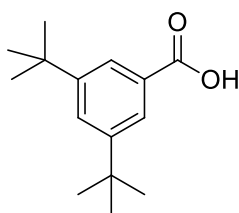

3,5-Di-tert-butylbenzoic acid (**6j**)

Yield 38%, 13.5 mg from **8c** in Table 3 (36 h, 20.0 mg, 47% of **8c** was recovered), white solid, m.p. 174.2 – 175.3 °C. <sup>1</sup>H NMR (400 MHz, CDCl<sub>3</sub>) δ 7.99 (s, 2H), 7.70 (s, 1H), 1.37 (s, 18H). <sup>13</sup>C NMR (100 MHz, CDCl<sub>3</sub>) δ 173.1, 151.3, 128.8, 128.2, 124.6, 35.1, 31.5.<sup>19</sup>

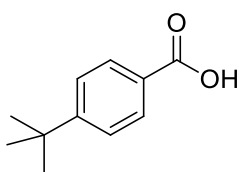

4-(tert-Butyl)benzoic acid (**6k**)

Yield 82%, 21.9 mg from **8d** in Table 3 (36 h, 4.4 mg, 13% of **8d** was recovered), white solid, m.p. 163.4 – 164.8 °C. <sup>1</sup>H NMR (400 MHz, DMSO-*d*<sub>6</sub>) δ 7.87 (d, *J* = 8.5 Hz, 2H), 7.51 (d, *J* = 8.5 Hz, 2H), 1.29 (s, 9H). <sup>13</sup>C NMR (100 MHz, DMSO-*d*<sub>6</sub>) δ 167.4, 155.8, 129.3, 128.1, 125.4, 34.8, 30.9.<sup>19</sup>

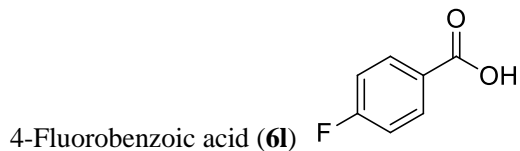

Yield 88%, 18.5 mg from **8e** in Table 3 (36 h), or yield 55%, 11.5 mg from **10c** in Table 3 (36 h), or yield 35%, 7.3 mg from **11b** in Table 3 (36 h), white solid, m.p. 182.3 – 183.9 °C. <sup>1</sup>H NMR (400 MHz, DMSO-*d*<sub>6</sub>) δ 13.05 (s, 1H), 7.99 (dd, *J* = 8.6, 5.7 Hz, 2H), 7.28 (t, *J* = 8.9 Hz, 2H). <sup>13</sup>C NMR (100 MHz, DMSO-*d*<sub>6</sub>) δ 166.4 (d, *J* = 24.3 Hz), 163.8, 132.2 (d, *J* = 13.8 Hz), 127.5 (d, *J* = 2.8 Hz), 132.2 (d, *J* = 13.8 Hz).<sup>1</sup>

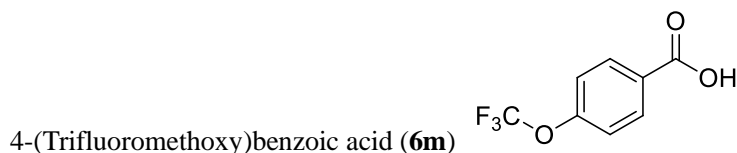

Yield 68%, 20.9 mg from **8f** in Table 3 (36 h, 10.1 mg, 26% of **8f** was recovered), white solid, m.p. 153.1 – 153.8 °C. <sup>1</sup>H NMR (400 MHz, DMSO-*d*<sub>6</sub>) δ 8.06 (d, *J* = 8.8 Hz, 2H), 7.48 (d, *J* = 8.3 Hz, 2H). <sup>13</sup>C NMR (100 MHz, DMSO-*d*<sub>6</sub>) δ 166.3, 151.5, 131.8, 129.9, 121.3, 119.8 (q, *J* = 211.2 Hz).<sup>17</sup>

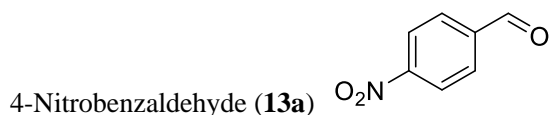

Yield 83%, 18.9 mg from **12a** in Table 4 (24 h), white solid, m.p. 104.7 – 105.2 °C. <sup>1</sup>H NMR (400 MHz, CDCl<sub>3</sub>) δ 10.16 (s, 1H), 8.40 (d, *J* = 8.7 Hz, 2H), 8.08 (d, *J* = 8.8 Hz, 2H). <sup>13</sup>C NMR (100 MHz, CDCl<sub>3</sub>) δ 190.5, 151.2, 140.1, 130.6, 124.4.<sup>8</sup>

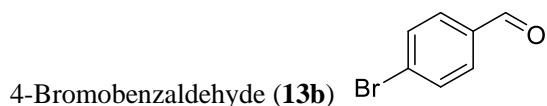

Yield 83%, 23.2 mg from **12b** in Table 4 (36 h, 4.3 mg, 15% of 4-bromobenzoic acid was isolated as a byproduct), white solid, m.p. 56.5 – 57.4 °C. <sup>1</sup>H NMR (400 MHz, CDCl<sub>3</sub>) δ 9.97 (s, 1H), 7.74 (d, *J* = 8.5 Hz, 2H), 7.68 (d, *J* = 8.5 Hz, 2H). <sup>13</sup>C NMR (100 MHz, CDCl<sub>3</sub>) δ 191.3, 135.1, 132.6, 131.1, 129.9.<sup>8</sup>

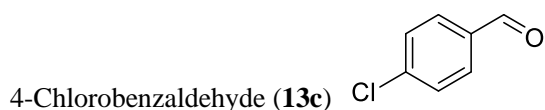

Yield 65%, 13.7 mg from **12c** in Table 4 (36 h, 3.7 mg, 16% of 4-chlorobenzoic acid was isolated as a byproduct), white solid, m.p. 44.4 – 47.7 °C. <sup>1</sup>H NMR (400 MHz, CDCl<sub>3</sub>) δ 9.98 (s, 1H), 7.82 (d, *J* = 8.4 Hz, 2H), 7.51 (d, *J* = 8.5 Hz, 2H). <sup>13</sup>C NMR (100 MHz, CDCl<sub>3</sub>) δ 191.1, 141.1, 134.8, 131.0, 129.6.<sup>8</sup>

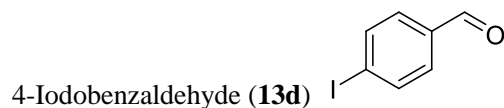

Yield 73%, 25.3 mg from **12d** in Table 4 (36 h), white solid, m.p. 81.3 – 81.9 °C. <sup>1</sup>H NMR (400 MHz, CDCl<sub>3</sub>) δ 9.95 (s, 1H), 7.91 (d, *J* = 8.3 Hz, 2H), 7.59 (d, *J* = 8.4 Hz, 2H). <sup>13</sup>C NMR (100 MHz, CDCl<sub>3</sub>) δ 191.6, 138.6, 135.7, 131.0, 103.0.<sup>8</sup>

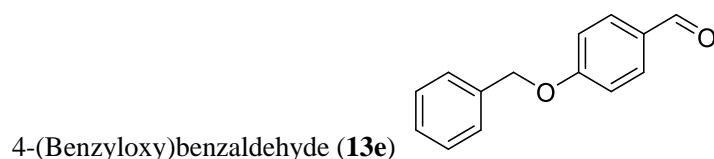

Yield 61%, 19.3 mg from **12e** in Table 4 (36 h, 10.3 mg, 30% of 4-(benzyloxy)benzoic acid was isolated as a byproduct), white solid, m.p. 72.0 – 73.7 °C. <sup>1</sup>H NMR (400 MHz, CDCl<sub>3</sub>) δ 9.89 (s, 1H), 7.84 (d, *J* = 8.4 Hz, 2H), 7.45 – 7.34 (m, 5H), 7.08 (d, *J* = 8.4 Hz, 2H), 5.15 (s, 2H). <sup>13</sup>C NMR (100 MHz, CDCl<sub>3</sub>) δ 191.0, 163.8, 136.0, 132.1, 130.2, 128.9, 128.5, 127.6, 115.2, 70.4.<sup>8</sup>

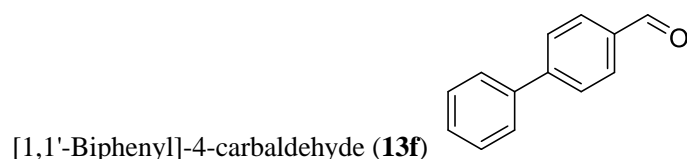

Yield 50%, 23.6 mg from **12f** in Table 3 (36 h, 9.8 mg, 33% of [1,1'-biphenyl]-4-carboxylic acid was isolated as a byproduct), white solid, m.p. 53.2 – 54.3 °C. <sup>1</sup>H NMR (400 MHz, CDCl<sub>3</sub>) δ 10.06 (s, 1H), 7.96 (d, *J* = 8.4 Hz, 2H), 7.75 (d, *J* = 7.9 Hz, 2H), 7.64 (d, *J* = 8.0 Hz, 2H), 7.49 (t, *J* = 7.2 Hz, 2H), 7.43 (t, *J* = 7.1 Hz, 1H). <sup>13</sup>C NMR (100 MHz, CDCl<sub>3</sub>) δ 192.1, 147.2, 139.8, 135.2, 130.4, 129.1, 128.6, 127.8, 127.4.<sup>8</sup>

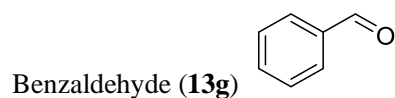

Yield 56%, 10.0 mg from BnCH<sub>2</sub>OH (**12g**) in Table 4 (36 h), colorless liquid. <sup>1</sup>H NMR (400 MHz, CDCl<sub>3</sub>) δ 10.02 (s, 1H), 7.88 (d, *J* = 7.9 Hz, 2H), 7.63 (t, *J* = 7.4 Hz, 1H), 7.57 – 7.50 (m, 2H). <sup>13</sup>C NMR (100 MHz, CDCl<sub>3</sub>) δ 192.6, 136.4, 134.6, 129.8, 129.1.<sup>8</sup>

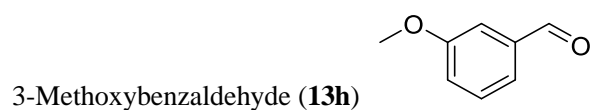

Yield 72%, 14.3 mg from **12h** in Table 4 (36 h, 4.3 mg, 19% of 3-methoxybenzoic acid was isolated as a byproduct), colorless oil.  $^1\text{H NMR}$  (400 MHz,  $\text{CDCl}_3$ )  $\delta$  9.97 (s, 1H), 7.49 – 7.42 (m, 2H), 7.39 (d,  $J = 1.4$  Hz, 1H), 7.21 – 7.15(m, 1H), 3.86 (s, 3H).  $^{13}\text{C NMR}$  (100 MHz,  $\text{CDCl}_3$ )  $\delta$  192.4, 160.2, 137.9, 130.2, 123.8, 121.7, 112.0, 55.6.<sup>8</sup>

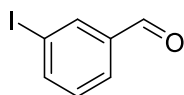

3-Iodobenzaldehyde (**13i**)

Yield 50%, 18.5 mg from **12i** in Table 4 (36 h, 1.0 mg, 3% of 3-iodobenzoic acid was isolated as a byproduct), yellow solid, m.p. 58.3 – 59.7 °C.  $^1\text{H NMR}$  (400 MHz,  $\text{CDCl}_3$ )  $\delta$  9.92 (s, 1H), 8.21 (s, 1H), 7.96 (d,  $J = 8.6$  Hz, 1H), 7.84 (d,  $J = 7.7$  Hz, 1H), 7.33 – 7.24 (m, 1H).  $^{13}\text{C NMR}$  (100 MHz,  $\text{CDCl}_3$ )  $\delta$  190.9, 143.3, 138.6, 138.1, 130.9, 129.0, 94.8.<sup>20</sup>

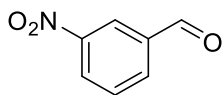

3-Nitrobenzaldehyde (**13j**)

Yield 59%, 13.4 mg from **12j** in Table 4 (36 h, 1.7 mg, 7% of 3-nitrobenzoic acid was isolated as a byproduct), pale yellow powder, m.p. 124.1 – 125.1 °C.  $^1\text{H NMR}$  (400 MHz,  $\text{CDCl}_3$ )  $\delta$  10.13 (s, 1H), 8.72 (s, 1H), 8.50 (d,  $J = 8.2$  Hz, 1H), 8.24 (d,  $J = 7.7$  Hz, 1H), 7.77 (t,  $J = 7.9$  Hz, 1H).  $^{13}\text{C NMR}$  (100 MHz,  $\text{CDCl}_3$ )  $\delta$  190.0, 148.9, 137.5, 134.8, 130.5, 128.8, 124.7.<sup>21</sup>

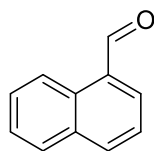

1-Naphthaldehyde (**13k**)

Yield 78%, 18.3 mg from **12k** in Table 4 (36 h, 5.6 mg, 21% of 1-naphthoic acid was isolated as a byproduct), yellow liquid.  $^1\text{H NMR}$  (400 MHz,  $\text{CDCl}_3$ )  $\delta$  10.40 (s, 1H), 9.26 (d,  $J = 8.3$  Hz, 1H), 8.11 (d,  $J = 8.2$  Hz, 1H), 8.00 (dd,  $J = 7.1, 1.3$  Hz, 1H), 7.93 (d,  $J = 8.2$  Hz, 1H), 7.70 (t,  $J = 7.7$  Hz, 1H), 7.66 – 7.57 (m, 2H).  $^{13}\text{C NMR}$  (100 MHz,  $\text{CDCl}_3$ )  $\delta$  193.8, 136.9, 135.5, 133.8, 131.5, 130.6, 129.2, 128.6, 127.1, 124.6.<sup>8</sup>

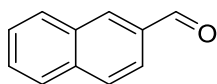

2-Naphthaldehyde (**13l**)

Yield 58%, 13.6 mg from **12l** in Table 4 (36 h), white solid, m.p. 60.6 – 61.0 °C.  $^1\text{H NMR}$  (400 MHz,  $\text{CDCl}_3$ )  $\delta$  10.17 (s, 1H), 8.35 (s, 1H), 8.05 – 7.85 (m, 4H), 7.68 – 7.63 (m, 1H), 7.63 – 7.57 (m, 1H).  $^{13}\text{C NMR}$  (100 MHz,  $\text{CDCl}_3$ )  $\delta$  192.5, 136.6, 134.8, 134.2, 132.7, 129.7, 129.3, 129.2, 128.2, 127.2, 122.8.<sup>8</sup>

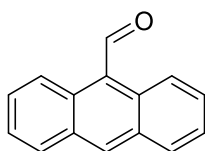

Anthracene-9-carbaldehyde (**13m**)

Yield 41%, 12.7 mg from **12m** in Table 4 (36 h), yellow solid, m.p. 100.8 – 102.5 °C. <sup>1</sup>H NMR (400 MHz, CDCl<sub>3</sub>) δ 11.50 (s, 1H), 8.96 (d, *J* = 9.0 Hz, 2H), 8.65 (s, 1H), 8.04 (d, *J* = 8.5 Hz, 2H), 7.77 – 7.60 (m, 2H), 7.59 – 7.49 (m, 2H). <sup>13</sup>C NMR (100 MHz, CDCl<sub>3</sub>) δ 193.1, 135.4, 132.2, 131.1, 129.4, 129.2, 125.8, 124.7, 123.6.<sup>21</sup>

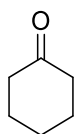

Cyclohexanone (**16a**)

Yield 96% (GC-MS yield with 1,3,5-trimethylbenzene as internal standard) from **15a** in Table 4 (12 h), colorless liquid. <sup>1</sup>H NMR (400 MHz, CDCl<sub>3</sub>) δ 2.32 (t, *J* = 6.7 Hz, 4H), 1.89 – 1.80 (m, 4H), 1.75 – 1.66 (m, 2H). <sup>13</sup>C NMR (100 MHz, CDCl<sub>3</sub>) δ 212.4, 42.1, 27.1, 25.1.<sup>1</sup>

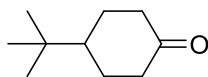

4-(tert-Butyl)cyclohexanone (**16b**)

Yield 71%, 16.7 mg from **15b** in Table 4 (36 h), white solid, m.p. 45.2 – 46.7 °C. <sup>1</sup>H NMR (400 MHz, CDCl<sub>3</sub>) δ 2.42 – 2.34 (m, 2H), 2.34 – 2.24 (m, 2H), 2.11 – 2.02 (m, 2H), 1.50 – 1.36 (m, 3H), 0.90 (s, 9H). <sup>13</sup>C NMR (100 MHz, CDCl<sub>3</sub>) δ 212.9, 46.8, 41.4, 32.6, 27.7.<sup>22</sup>

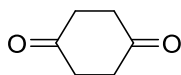

Cyclohexan-1,4-dione (**16c**)

Yield 53%, 8.9 mg from **15c** in Table 4 (24 h), yellow solid, m.p. 75.9 – 77.9 °C. <sup>1</sup>H NMR (400 MHz, CDCl<sub>3</sub>) δ 2.69 (s, 8H). <sup>13</sup>C NMR (100 MHz, CDCl<sub>3</sub>) δ 208.6, 36.7.<sup>22</sup>

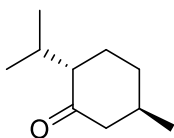

(2S, 5R)-Menthone (**16d**)

Yield 59%, 14.6 mg from **15d** in Table 4 (36 h), colorless liquid. <sup>1</sup>H NMR (400 MHz, CDCl<sub>3</sub>) δ 2.34 (ddd, *J* = 12.9, 3.9, 2.2 Hz, 1H), 2.18 – 1.94 (m, 4H), 1.93 – 1.79 (m, 2H), 1.45 – 1.26 (m, 2H), 1.00 (d, *J* = 6.3 Hz, 3H), 0.90 (d, *J* = 6.8 Hz, 3H), 0.84 (d, *J* = 6.7 Hz, 3H). <sup>13</sup>C NMR (100 MHz, CDCl<sub>3</sub>) δ 212.7, 56.0, 51.0, 35.6, 34.0, 28.0, 26.0, 22.4, 21.4, 18.8.<sup>23</sup>

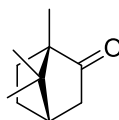

(1S,4S)-1,7,7-Trimethylbicyclo[2.2.1]heptan-2-one (**16e**)

Yield 64%, 14.6 mg from **15e** in Table 4 (36 h), white solid, m.p. 173.3 – 176.6 °C. <sup>1</sup>H NMR (400 MHz, CDCl<sub>3</sub>) δ 2.34 – 2.28 (m, 1H), 2.05 (t, *J* = 4.6 Hz, 1H), 1.97 – 1.86 (m, 1H), 1.80 (d, *J* = 18.2 Hz, 1H), 1.68 – 1.61 (m, 1H), 1.41 – 1.24 (m, 2H), 0.92 (s, 3H), 0.87 (s, 3H), 0.79 (s, 3H). <sup>13</sup>C NMR (100 MHz, CDCl<sub>3</sub>) δ 219.8, 57.8, 46.8, 43.4, 43.1, 30.0, 27.1, 19.9, 19.2, 9.3.<sup>24</sup>

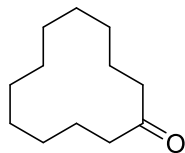

Cyclododecanone (**16f**)

Yield 72%, 19.5 mg from **15f** in Table 4 (36 h), white solid, m.p. 57.1 – 58.7 °C. <sup>1</sup>H NMR (400 MHz, DMSO-*d*<sub>6</sub>) δ 2.46 – 2.39 (m, 4H), 1.64 – 1.58 (m, 4H), 1.29 – 1.12 (m, 14H). <sup>13</sup>C NMR (100 MHz, DMSO-*d*<sub>6</sub>) δ 211.9, 39.7, 24.2, 24.2, 23.8, 22.0, 22.0.<sup>1</sup>

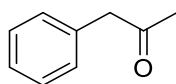

1-Phenylpropan-2-one (**16g**)

Yield 71%, 14.3 mg from **14g** in Table 4 (36 h), colorless liquid. <sup>1</sup>H NMR (400 MHz, CDCl<sub>3</sub>) δ 7.34 (t, *J* = 7.2 Hz, 2H), 7.30 – 7.26 (m, 1H), 7.21 (d, *J* = 8.0 Hz, 2H), 3.70 (s, 2H), 2.16 (s, 3H). <sup>13</sup>C NMR (100 MHz, CDCl<sub>3</sub>) δ 206.7, 134.3, 129.5, 128.9, 127.2, 51.2, 29.4.<sup>25</sup>

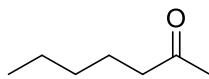

Heptan-2-one (**16h**)

Yield 60%, 10.3 mg from **15h** in Table 4 (24 h), colorless liquid. <sup>1</sup>H NMR (400 MHz, CDCl<sub>3</sub>) δ 2.41 (t, *J* = 7.5 Hz, 2H), 2.12 (s, 3H), 1.61 – 1.51 (m, 2H), 1.35 – 1.19 (m, 4H), 0.88 (t, *J* = 6.9 Hz, 3H). <sup>13</sup>C NMR (100 MHz, CDCl<sub>3</sub>) δ 209.6, 43.9, 31.5, 30.0, 23.7, 22.6, 14.0.<sup>1</sup>

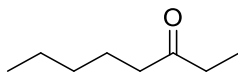

Octan-3-one (**16i**)

Yield 73%, 14.0 mg from **15i** in Table 4 (36 h), yellow liquid. <sup>1</sup>H NMR (400 MHz, DMSO-*d*<sub>6</sub>) δ 2.44 – 2.36 (m, 4H), 1.48 – 1.41 (m, 2H), 1.28 – 1.17 (m, 4H), 0.90 (t, *J* = 7.3 Hz, 3H), 0.85 (t, *J* = 7.1 Hz, 3H). <sup>13</sup>C NMR (100 MHz, DMSO-*d*<sub>6</sub>) δ 211.0, 41.5, 35.0, 30.9, 23.0, 22.0, 13.9, 7.7.<sup>1</sup>

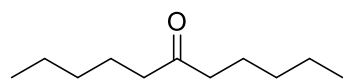

6-Undecanone (**16j**)

Yield 64%, 16.4 mg from **15j** in Table 4 (36 h), yellow liquid. <sup>1</sup>H NMR (400 MHz, DMSO-*d*<sub>6</sub>) δ 2.38 (t, *J* = 7.3 Hz, 4H), 1.48 – 1.40 (m, 4H), 1.28 – 1.16 (m, 8H), 0.84 (t, *J* = 7.1 Hz, 6H). <sup>13</sup>C NMR (100 MHz, DMSO-*d*<sub>6</sub>) δ 210.6, 41.8, 30.9, 23.0, 22.0, 13.9.<sup>26</sup>

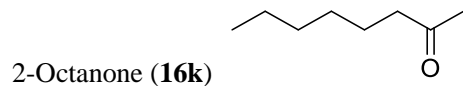

Yield 78%, 15 mg from **15k** in Table 4 (36 h), yellow liquid.  $^1\text{H NMR}$  (400 MHz,  $\text{DMSO-}d_6$ )  $\delta$  2.39 (t,  $J = 7.3$  Hz, 2H), 2.05 (s, 3H), 1.47 – 1.39 (m, 2H), 1.29 – 1.17 (m, 6H), 0.85 (t,  $J = 6.8$  Hz, 3H).  $^{13}\text{C NMR}$  (100 MHz,  $\text{DMSO-}d_6$ )  $\delta$  208.3, 42.7, 31.2, 29.6, 28.3, 23.2, 22.0, 13.9.<sup>27</sup>

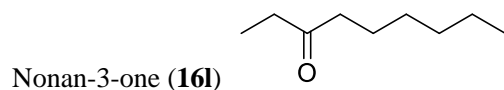

Yield 60%, 12.8 mg from **15l** in Table 4 (36 h), yellow liquid.  $^1\text{H NMR}$  (400 MHz,  $\text{DMSO-}d_6$ )  $\delta$  2.44 – 2.36 (m, 4H), 1.47 – 1.40 (m, 2H), 1.27 – 1.20 (m, 6H), 0.90 (t,  $J = 7.3$  Hz, 3H), 0.85 (t,  $J = 6.9$  Hz, 3H).  $^{13}\text{C NMR}$  (100 MHz,  $\text{DMSO-}d_6$ )  $\delta$  211.0, 41.5, 35.0, 31.1, 28.3, 23.3, 22.0, 13.9, 7.7.<sup>28</sup>

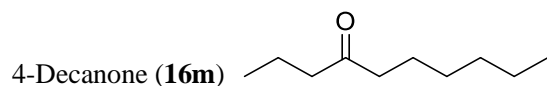

Yield 52%, 12.2 mg from **15m** in Table 4 (36 h), colorless liquid.  $^1\text{H NMR}$  (400 MHz,  $\text{DMSO-}d_6$ )  $\delta$  2.40 – 2.33 (m, 4H), 1.50 – 1.40 (m, 4H), 1.22 (s, 6H), 0.86 – 0.80 (m, 6H).  $^{13}\text{C NMR}$  (100 MHz,  $\text{DMSO-}d_6$ )  $\delta$  210.5, 43.8, 41.9, 31.2, 28.4, 23.2, 22.1, 16.7, 14.0, 13.6.<sup>27</sup>

## 4. Mechanistic Studies

### (1) Radical trapping and superoxide scavenger experiments

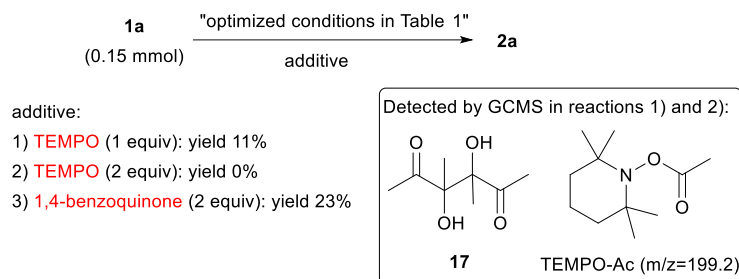

The procedures were the same as the above-optimized procedure for the oxidation of **1a** (27.8 mg, 0.15 mmol), with the addition of TEMPO (23.4 mg, 0.15 mmol, or 46.9 mg, 0.30 mmol, 1 or 2 equiv) or 1,4-benzoquinone (32.3 mg, 0.30 mmol, 2 equiv), which afforded 3.4 mg, 0 mg, or 6.8 mg of **2a** after purified by column chromatography in a yield of 11%, 0%, or 23%, respectively. In reactions 1) or reaction 2), TEMPO-Ac was detected by GC-MS in a molecular weight of 199.2 at 11.123 min (Figure S2a).<sup>29</sup> A pair of diastereoisomers of **17** was detected by GC-MS in a molecular weight of 131.1 ([M-Ac]<sup>+</sup>) at 7.546 min and 7.778 min (Figure S2b).

**Figure S2.** Spectrum of TEMPO-Ac and **17**

(a) GC-MS of compound TEMPO-Ac ( $t_R=11.123$  min) in Scheme 3a

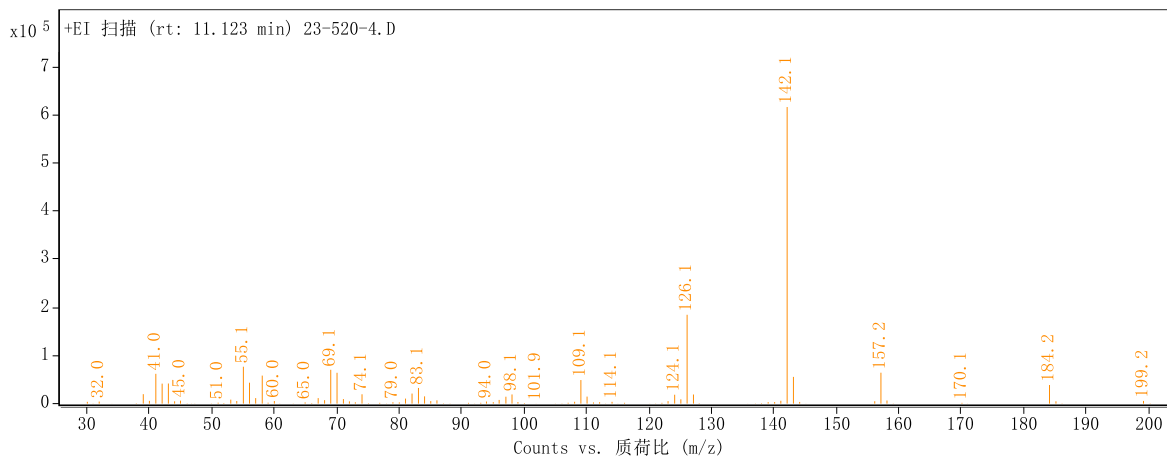



(b) GC-MS of **17** ( $t_R=7.546$  min and 7.778 min) in Scheme 3a

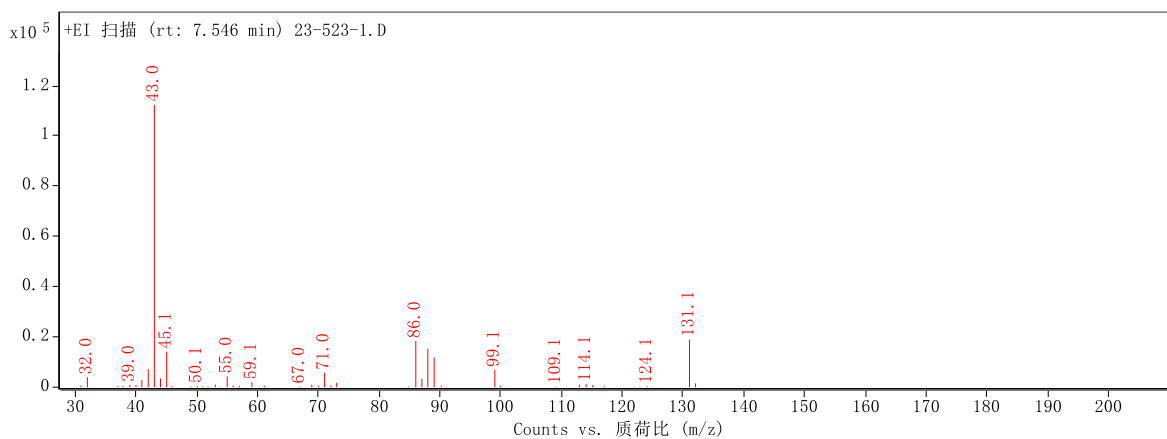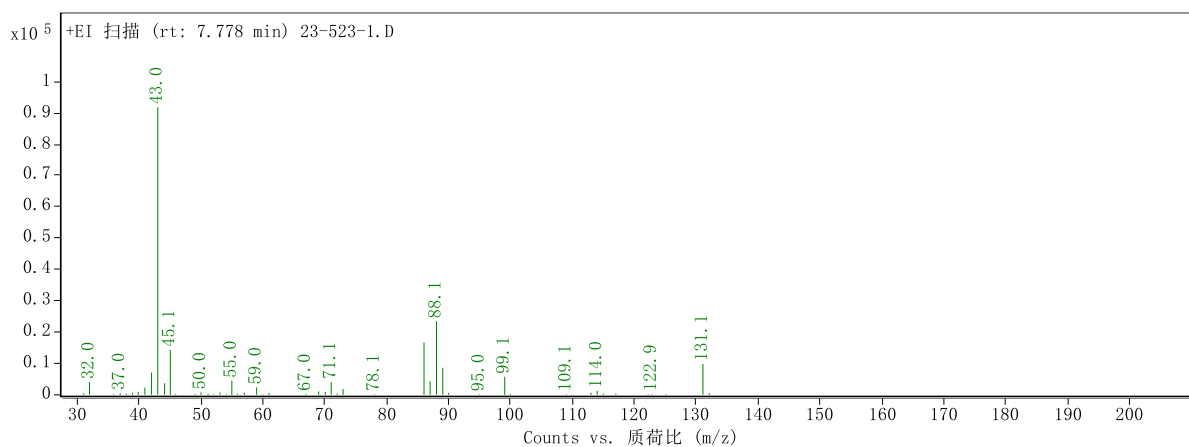

(2) Trapping <sup>1</sup>O<sub>2</sub> by 9,10-Dimethylantracene

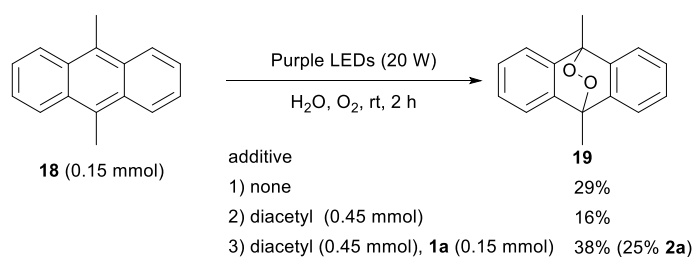

To three 10 mL quartz tubes charged with a magnetic stir bar were added 9,10-dimethylantracene **18** (30.9 mg, 0.15 mmol), H<sub>2</sub>O (0.6 mL), diacetyl (0 mmol, 0.45 mmol, or 0.45 mmol), and **1a** (0 mmol, 0 mmol, or 0.45 mmol), respectively. The mixture was bubbled with O<sub>2</sub> for 15 min and then irradiated by purple LEDs (420 nm, 20 W) with vigorous stirring at room temperature. After 24 h, the solution was extracted with EtOAc (3 mL×3). The combined organic layers were washed with brine (2 mL), dried with anhydrous Na<sub>2</sub>SO<sub>4</sub>, and purified by column chromatography with petroleum ether/EtOAc (10:1) to afford 10.4 mg, 5.8 mg, or 13.6 mg of **19** in a yield of 29%, 16% or 38%, <sup>1</sup>H NMR (400 MHz, CDCl<sub>3</sub>) δ 7.43 – 7.37 (m, 4H), 7.32 – 7.26 (m, 4H), 2.16 (s, 6H). <sup>13</sup>C NMR (400 MHz, CDCl<sub>3</sub>) δ 140.8, 127.5, 120.8, 79.7,

13.9. GC-MS (EI): m/z 238.1, 219.1, 195.1 (Figure S3).<sup>30</sup> 7.8 mg of **2a** was obtained as well for the third reaction in a yield of 25%.

**Figure S3.** GC-MS and NMR spectra of **19**

(a) GC-MS report of product **19** ( $t_R=17.272$  min)

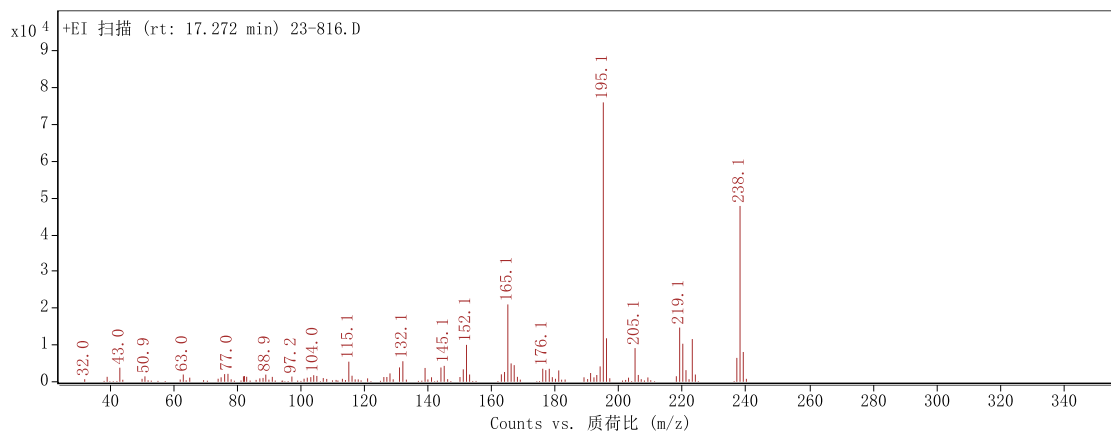

(b) <sup>1</sup>H NMR of **19**

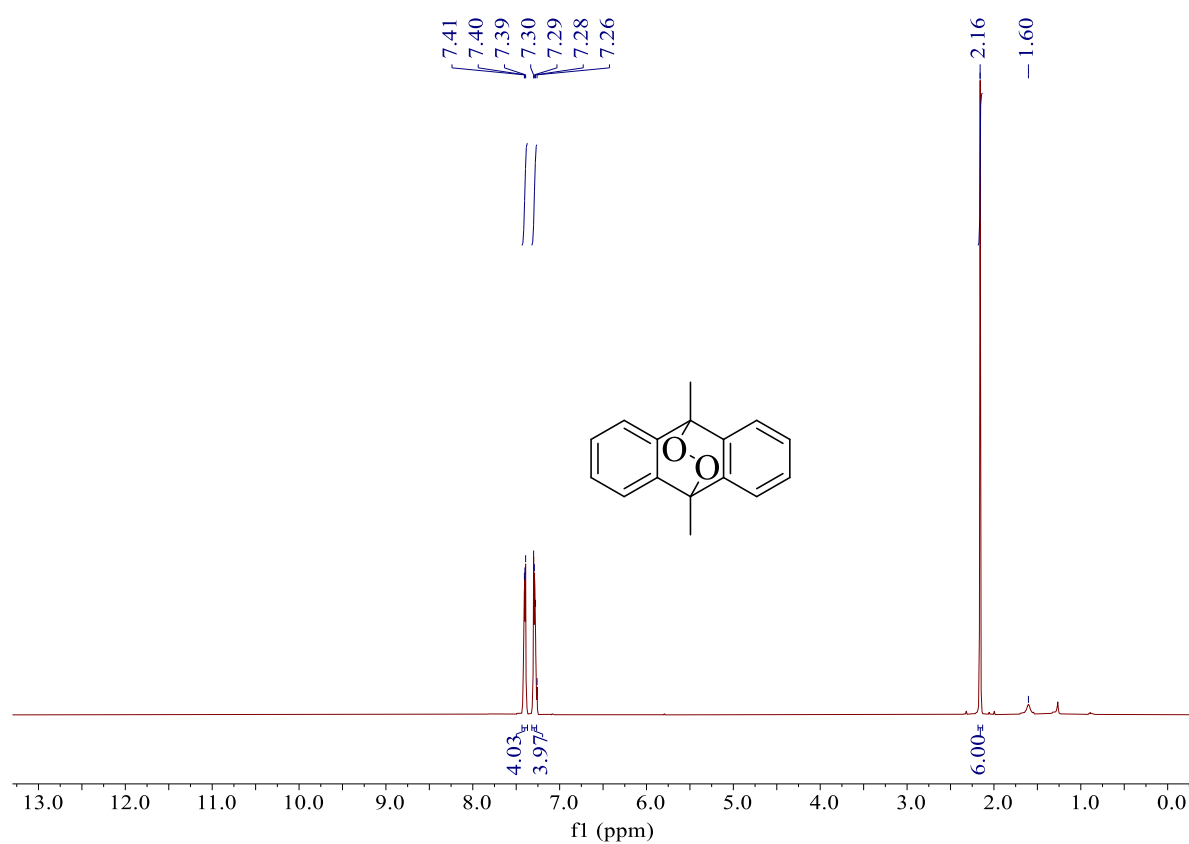

(c)  $^{13}\text{C}$  NMR of **19**

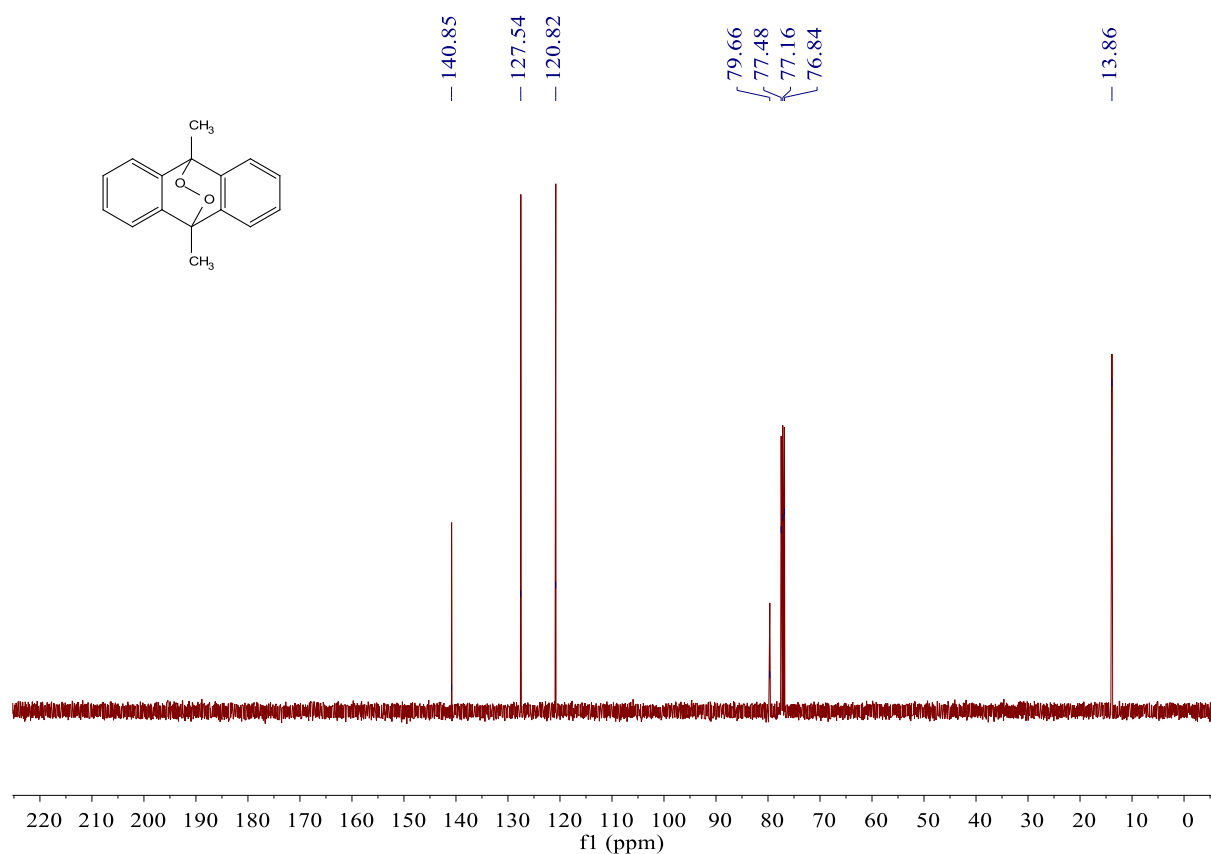

(3) DABCO as a  $^1\text{O}_2$  quencher

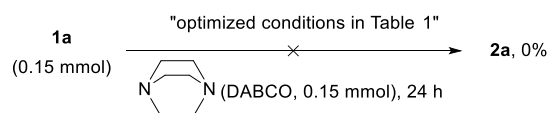

To a 10 mL quartz tube charged with a magnetic stir bar was added **1a** (27.8 mg, 0.15 mmol),  $\text{H}_2\text{O}$  (0.6 mL), diacetyl (0.45 mmol, 3 equiv, 39.5  $\mu\text{L}$ ) and 1,4-diazabicyclo[2.2.2]octane (DABCO, 16.7 mg, 0.15 mmol). The mixture was bubbled with  $\text{O}_2$  for 15 min and then irradiated by purple LEDs (420 nm, 20 W) with vigorous stirring at room temperature. After 24 h, the solution was extracted with EtOAc (3 mL $\times$ 3) and the combined organic phase was detected by GC-MS, which indicated no formation of **2a**.

#### (4) Fluorescent detection of radical intermediates

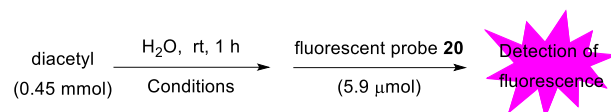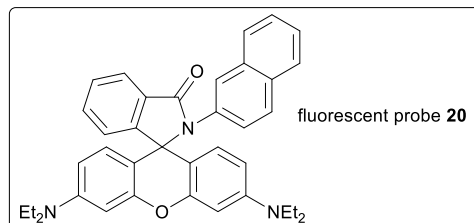

| Conditions:                                                                       | fluorescence change |
|-----------------------------------------------------------------------------------|---------------------|
| 1) Purple LEDs (20 W), O <sub>2</sub>                                             | (+)                 |
| 2) Purple LEDs (20 W), O <sub>2</sub> , <b>1a</b> (0.15 mmol)                     | (+)                 |
| 3) Purple LEDs (20 W), Ar, <b>1a</b> (0.15 mmol)                                  | (-)                 |
| 4) <b>in dark</b> , O <sub>2</sub> , <b>1a</b> (0.15 mmol)                        | (-)                 |
| 5) Purple LEDs (20 W), O <sub>2</sub> , <b>1a</b> (0.15 mmol), <b>no diacetyl</b> | (-)                 |

color of the reactions mixture:

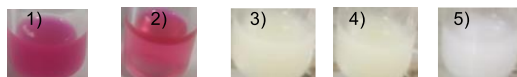

Reaction 1): To a 10 mL quartz tube charged with a magnetic stir bar was added diacetyl (0.45 mmol, 39.5  $\mu\text{L}$ ) and H<sub>2</sub>O (0.6 mL). The mixture was bubbled with O<sub>2</sub> for 15 min and then irradiated by purple LEDs (420 nm, 20 W) with vigorous stirring at room temperature for 1 h. The fluorescent probe **20** (5.9  $\mu\text{mol}$ , 3.3 mg) in CH<sub>3</sub>CN (0.4 mL) was added to the above reaction mixture. The color of the mixture was taken by a cell phone, and then the solution was analyzed by a fluorescence spectrophotometer (Figure S4).

Reaction 2): A similar procedure was carried out except with an addition of **1a** (27.8 mg, 0.15 mmol).

Reaction 3): A similar procedure was carried out except with an addition of **1a** (27.8 mg, 0.15 mmol), and the mixture was bubbled with argon for 15 min.

Reaction 4): A similar procedure was carried out except with an addition of **1a** (27.8 mg, 0.15 mmol), and the mixture was stirred in the dark.

Reaction 5): A similar procedure was carried out except with an addition of **1a** (27.8 mg, 0.15 mmol), and no diacetyl was added.

Figure S4. Fluorescent spectra of radical intermediates with the addition of probe 20.

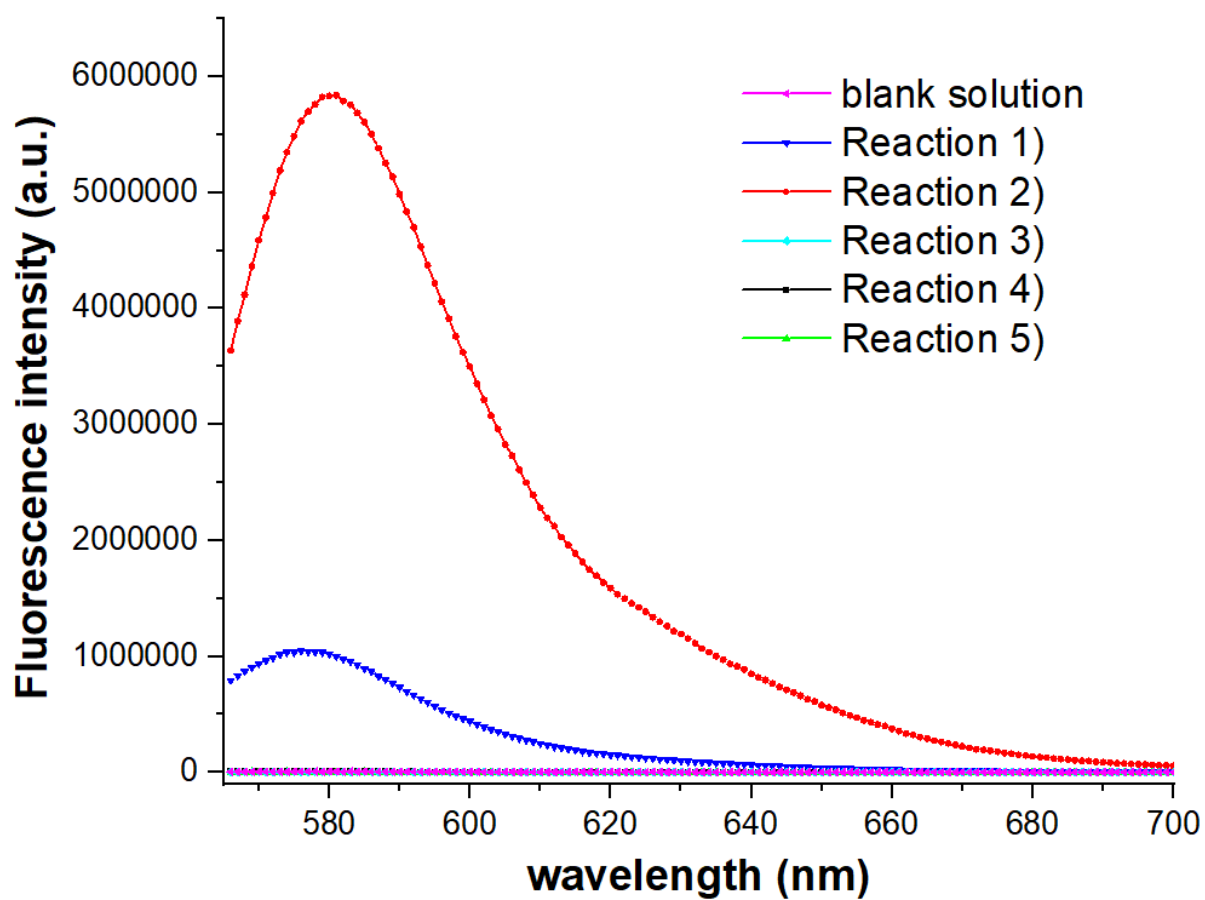

## 5. References

- (1) X. Zhu, Y. Liu, C. Liu, H. Yang and H. Fu, A sodium trifluoromethanesulfinate-mediated photocatalytic strategy for aerobic oxidation of alcohols. *Chem. Commun.*, 2020, **56**, 12443-12446.
- (2) X. Zhu, Y. Liu, C. Liu, H. Yang and H. Fu, Light and oxygen-enabled sodium trifluoromethanesulfinate-mediated selective oxidation of C–H bonds. *Green Chem.*, 2020, **22**, 4357-4363.
- (3) J. J. Yun, X. Y. Liu, W. Deng, X. Q. Chu, Z. L. Shen and T. P. Loh, Chromium (III)-catalyzed addition of water and alcohol to  $\alpha$ ,  $\beta$ -unsaturated ketones for the synthesis of  $\beta$  - hydroxyl and  $\beta$ -alkoxyl ketones in aqueous media. *J. Org. Chem.*, 2018, **83**, 10898-10907.
- (4) J. Li, W. Bao, Z. Tang, B. Guo, S. Zhang, H. Liu, S. Huang, Y. Zhang and Y. Rao, Cercosporin-bioinspired selective photooxidation reactions under mild conditions. *Green Chem.*, 2019, **21**, 6073-6081.
- (5) J. D. Guo, Y. J. Chen, C. H. Wang, Q. He, X. L. Yang, T. Y. Ding, K. Zhang, R. N. Ci, B. Chen, C. H. Tung and L. Z. Wu, Direct excitation of aldehyde to activate the C (sp<sup>2</sup>)–H bond by cobaloxime catalysis toward fluorenones synthesis with hydrogen evolution. *Angew. Chem., Int. Ed.*, 2023, **62**, e202214944.
- (6) D. Ye, Z. Liu, J. L. Sessler and C. Lei, Base-free oxidation of alcohols enabled by nickel (II)-catalyzed transfer dehydrogenation. *Chem Commun (Camb)*, 2020, **56**, 11811-11814.
- (7) X. Yue, Y. Ouyang, J. Zhu, J. Yue, J. Peng and W. Li, Photo-induced cleavage of alkenes to carbonyls in water. *Asian J. Org. Chem.*, 2023, **12**, e202300124.
- (8) G. F. Zha, W. Y. Fang, J. Leng and H. L. Qin, A Simple, Mild and general oxidation of alcohols to aldehydes or ketones by SO<sub>2</sub>F<sub>2</sub>/K<sub>2</sub>CO<sub>3</sub> using DMSO as solvent and oxidant, *Adv. Synth. Catal.*, 2019, **361**, 2262-2267.
- (9) K. Walsh, H. F. Sneddon and C. J. Moody, Sneddon, and Christopher J. Moody. Solar photochemical oxidations of benzylic and allylic alcohols using catalytic organo-oxidation with DDQ: Application to lignin models. *Org. Lett.*, 2014, **16**, 5224-5227.
- (10) H. Zhang, T. Guo, M. Wu, X. Huo, S. Tang, X. Wang and J. Liu, 4CzIPN catalyzed photochemical oxidation of benzylic alcohols. *Tetrahedron Lett.*, 2021, **67**, 152878.
- (11) L. Ma, Y. Yu, L. Xin, L. Zhu, J. Xia, P. Ou and X. Huang, Visible light enabled formal cross silyl benzoin reaction as an access to  $\alpha$ -hydroxyketones. *Adv. Synth. Catal.*, 2021, **363**, 2573-2577.

- (12) Y. Zhang, S. Qin, N. Claes, W. Schilling, P. K. Sahoo, H. Y. V. Ching, A. Jaworski, F. Lemière, A. Slabon, S. Van Doorslaer, S. Bals and S. Das, Direct solar energy-mediated synthesis of tertiary benzylic alcohols using a metal-free heterogeneous photocatalyst. *ACS Sustainable Chem. Eng.*, 2021, **10**, 530-540.
- (13) D. Hu and X. Jiang, Stepwise benzylic oxygenation via uranyl-photocatalysis. *Green Chem.*, 2022, **24**, 124-129.
- (14) A. F. Quivelli, G. D'Addato, P. Vitale, J. García-Álvarez, F. M. Perna and V. Capriati, Expedient and practical synthesis of tertiary alcohols from esters enabled by highly polarized organometallic compounds under aerobic conditions in Deep Eutectic Solvents or bulk water. *Tetrahedron.*, 2021, **81**, 131898.
- (15) N. Basarić, I. Žabčić, K. Mlinarić-Majerski and P. Wan, Photochemical formation and chemistry of long-lived adamantylidene-quinone methides and 2-adamantyl cations. *J. Org. Chem.*, 2010, **75**, 102-116.
- (16) K. Zheng, X. Yan, G. Zhang, X. Yan, X. Li and X. Xu, Photoinduced carbon tetrabromide initiated aerobic oxidation of substituted toluenes to carboxylic acids. *Synlett.*, 2020, **31**, 272-274.
- (17) J. Wu, J. Chen, L. Wang, H. Zhu, R. Liu, G. Song, C. Feng and Y. Li, Brønsted acid-catalysed aerobic photo-oxygenation of benzylic C–H bonds. *Green Chem.*, 2023, **25**, 940-945.
- (18) B. M. Bizzarri, A. Fanelli, L. Botta, C. Sadun, L. Gontrani, F. Ferella, M. Crucianelli and R. Saladino, Dendrimer crown-ether tethered multi-wall carbon nanotubes support methyltrioxorhenium in the selective oxidation of olefins to epoxides. *RSC Adv.*, 2020, **10**, 17185-17194.
- (19) Y. Wang, Z. Zhao, D. Pan, S. Wang, K. Jia, D. Ma, G. Yang, X. S. Xue and Y. Qiu, Metal-free electrochemical carboxylation of organic halides in the presence of catalytic amounts of an organomediator. *Angew. Chem., Int. Ed.*, 2022, **61**, e202210201.
- (20) M. Bergström, G. Suresh, V. R. Naidu and C. R. Unelius, *N*-Iodosuccinimide (NIS) in direct aromatic iodination. *Eur. J. Org. Chem.*, 2017, **2017**, 3234-3239.
- (21) E. Sheikhi, M. Adib, M. Akherati Karajabad and N. Rezaei, Metal-free and selective oxidation of benzylic alcohols to aromatic aldehydes by hexachloroacetone. *Chemistry Select.*, 2019, **4**, 13455-13458.

- (22) G. Laudadio, S. Govaerts, Y. Wang, D. Ravelli, H. F. Koolman, M. Fagnoni, S. W. Djuric and T. Noël, Selective C (sp<sup>3</sup>)-H aerobic oxidation enabled by decatungstate photocatalysis in flow. *Angew. Chem., Int. Ed.*, 2018, **57**, 4078-4082.
- (23) S. Kamijo, K. Tao, G. Takao, H. Tonoda and T. Murafuji, Photoinduced oxidation of secondary alcohols using 4-benzoylpyridine as an oxidant. *Org. Lett.*, 2015, **17**, 3326-3329.
- (24) W. Zhang, K. L. Carpenter and S. Lin, Electrochemistry broadens the scope of flavin photocatalysis: photoelectrocatalytic oxidation of unactivated alcohols. *Angew. Chem., Int. Ed.*, 2019, **59**, 409-417.
- (25) J. B. McManus, J. D. Griffin, A. R. White, & D. A. Nicewicz, Homobenzylic oxygenation enabled by dual organic photoredox and cobalt catalysis. *J. Am. Chem. Soc.*, 2020, **142**, 10325-10330.
- (26) E. Ota, H. Wang, N. L. Frye and R. R. Knowles, A redox strategy for light-driven, out-of-equilibrium isomerizations and application to catalytic C-C bond cleavage reactions. *J. Am. Chem. Soc.*, 2019, **141**, 1457-1462.
- (27) S. Paul and J. Guin, A general approach to intermolecular olefin hydroacylation through light-induced hat initiation: an efficient synthesis of long-chain aliphatic ketones and functionalized fatty acids. *Chem. - Eur. J.*, 2021, **27**, 4412-4419.
- (28) C.-H. Jun, K.-M. Cha and E.-A. Jo, Tandem catalytic triple-bond cleavage of alkyne in association with aldehyde, alkene, and water. *Synlett.*, 2009, **2009**, 2939-2942.
- (29) M. Ran, J. He, B. Yan, W. Liu, Y. Li, Y. Fu, C. J. Li and Q. Yao, Catalyst-free generation of acyl radicals induced by visible light in water to construct C-N bonds. *Org. Biomol. Chem.*, 2021, **19**, 1970-1975.
- (30) L.-Y. Xie, Y.-S. Bai, X.-Q. Xu, X. Peng, H.-S. Tang, Y. Huang, Y.-W. Lin, Z. Cao and W.-M. He, Visible-light-induced decarboxylative acylation of quinoxalin-2 (1 H)-ones with  $\alpha$ -oxo carboxylic acids under metal-, strong oxidant-and external photocatalyst-free conditions. *Green Chem.*, 2020, **22**, 1720-1725.



## 6. NMR Spectra

### $^1\text{H}$ NMR of compound 2a:

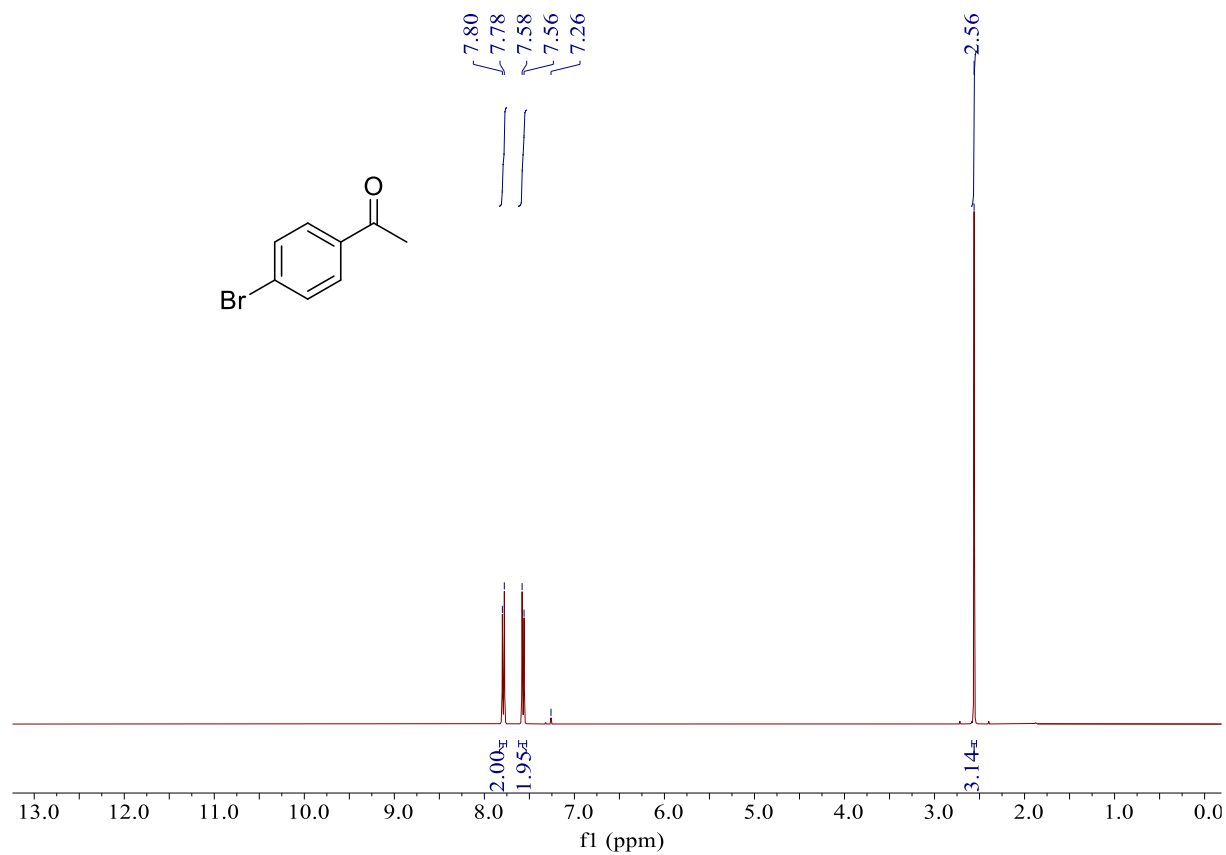

### $^{13}\text{C}$ NMR of compound 2a:

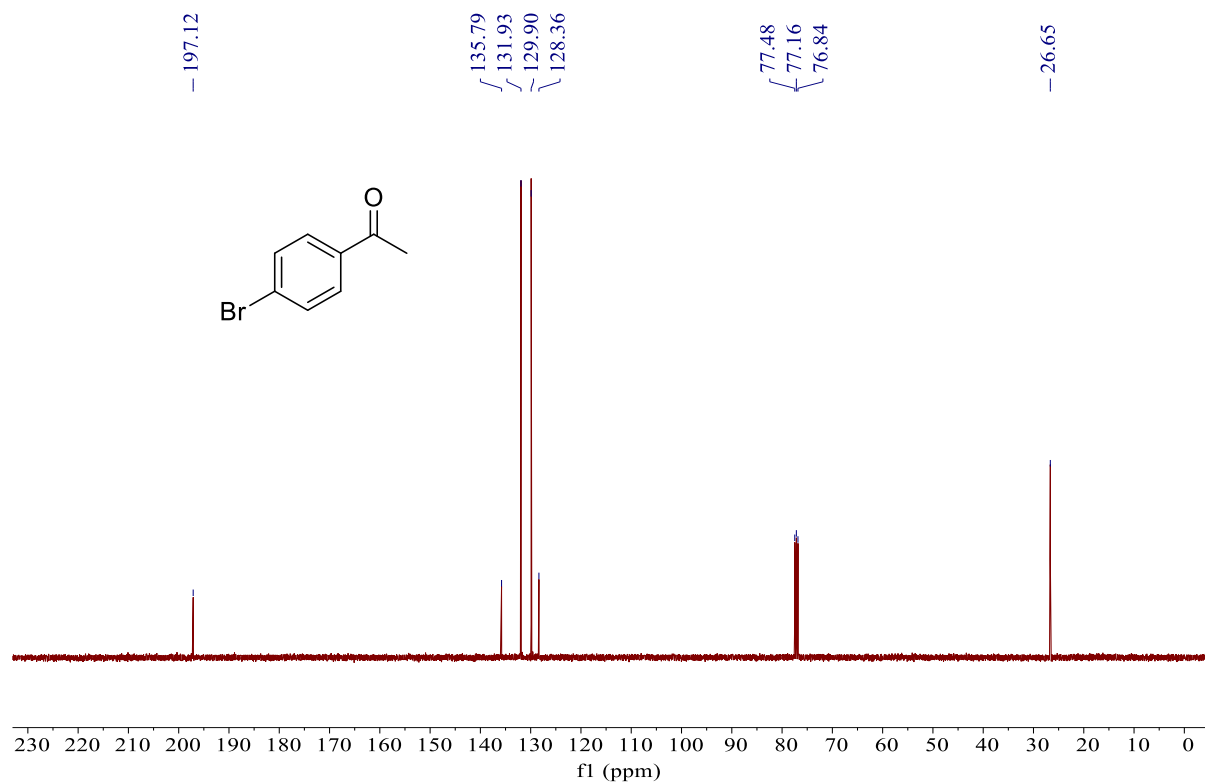

**<sup>1</sup>H NMR of compound 2b:**

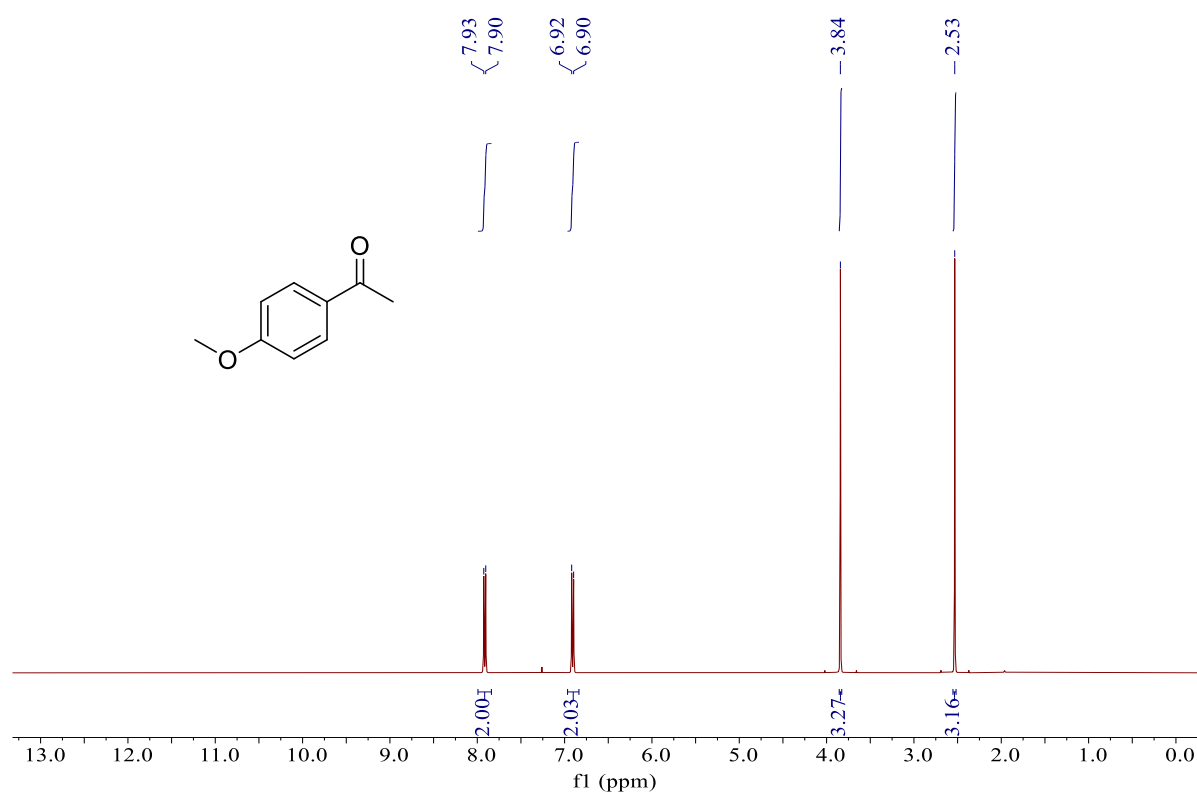

**<sup>13</sup>C NMR of compound 2b:**

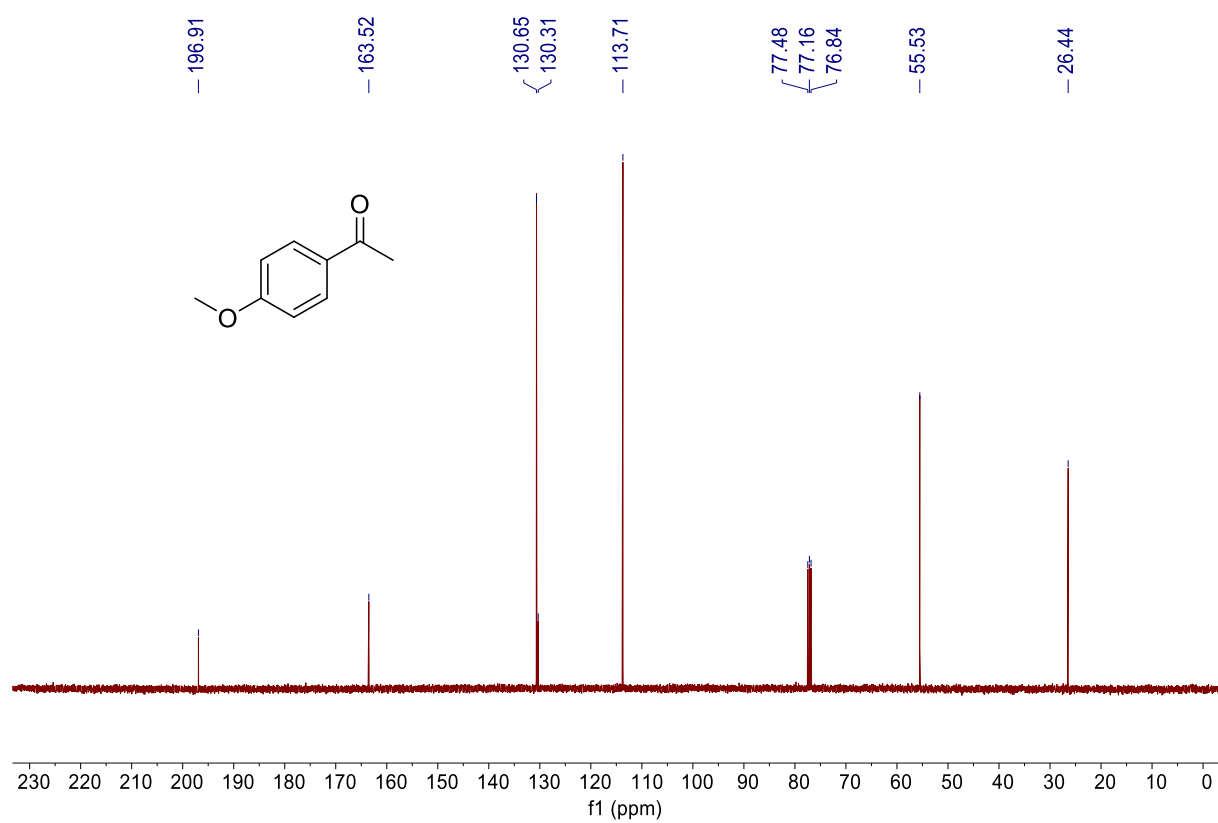

**<sup>1</sup>H NMR of compound 2c:**

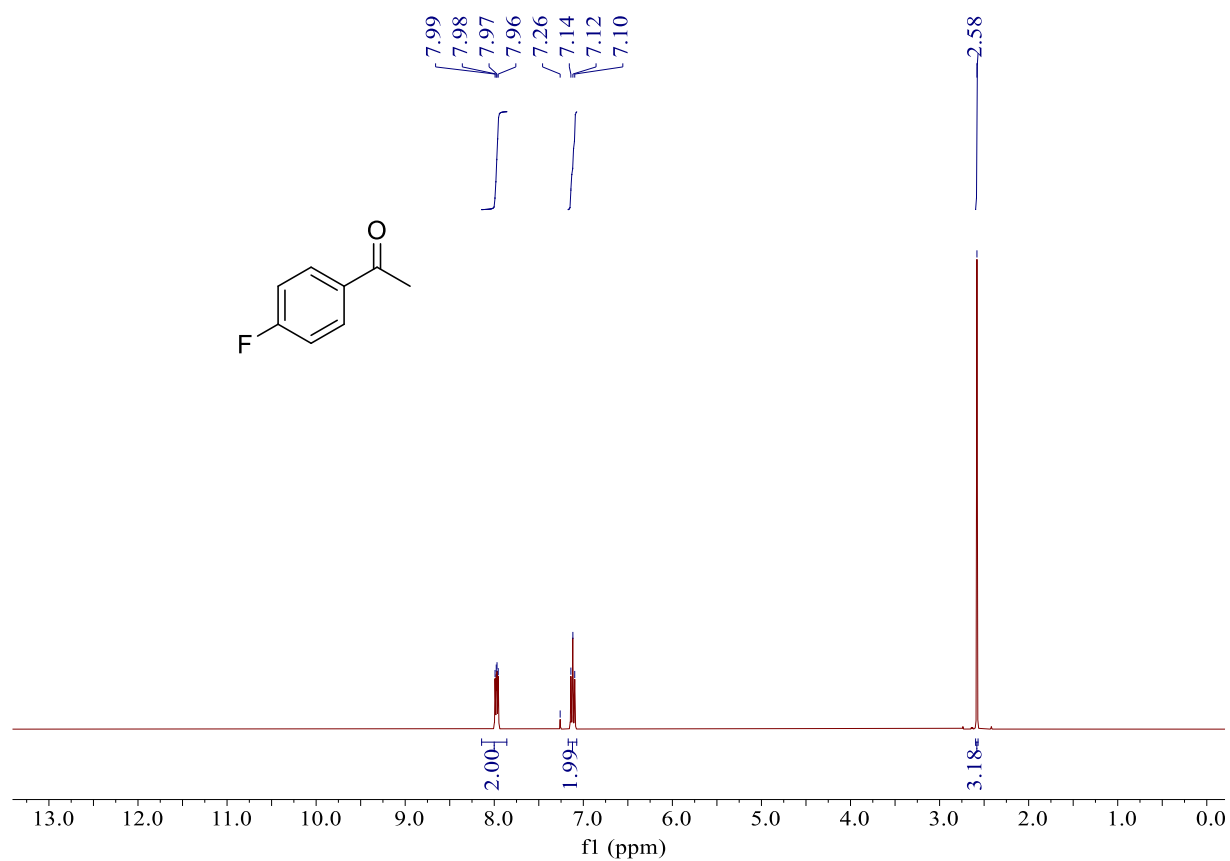

**<sup>13</sup>C NMR of compound 2c:**

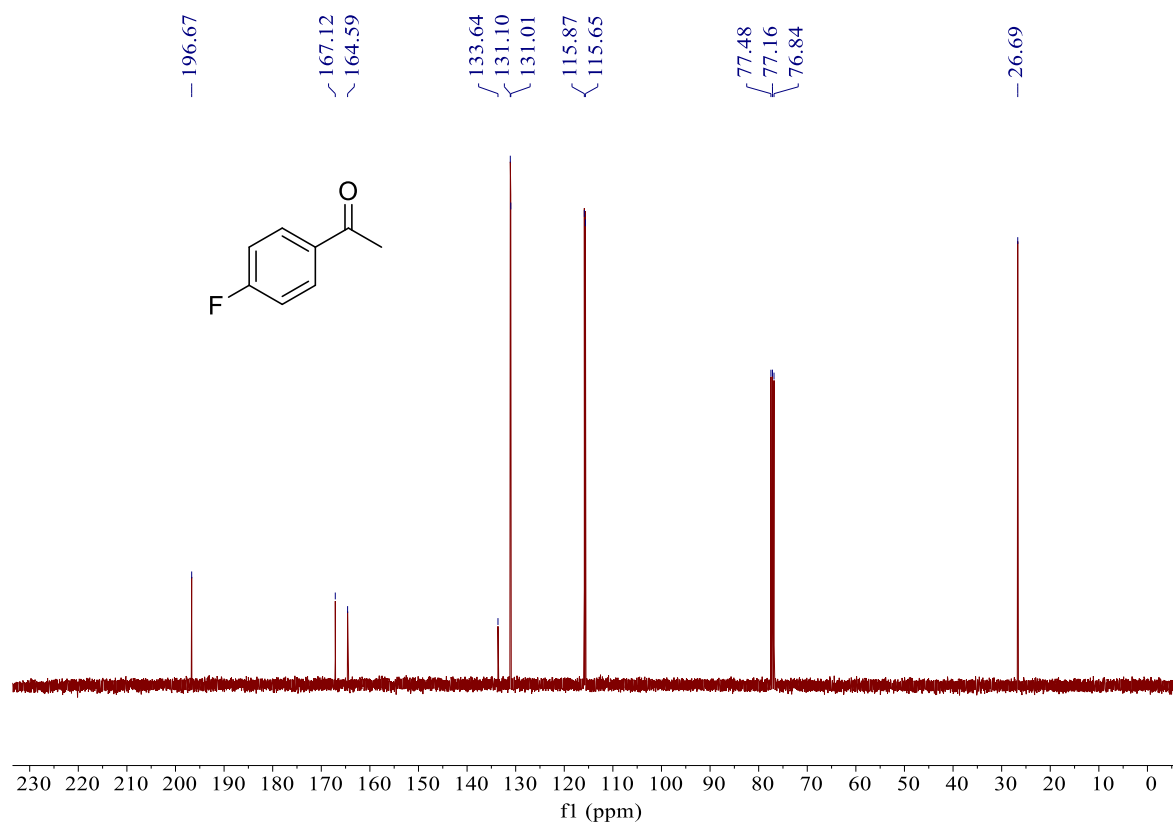

**<sup>1</sup>H NMR of compound 2d:**

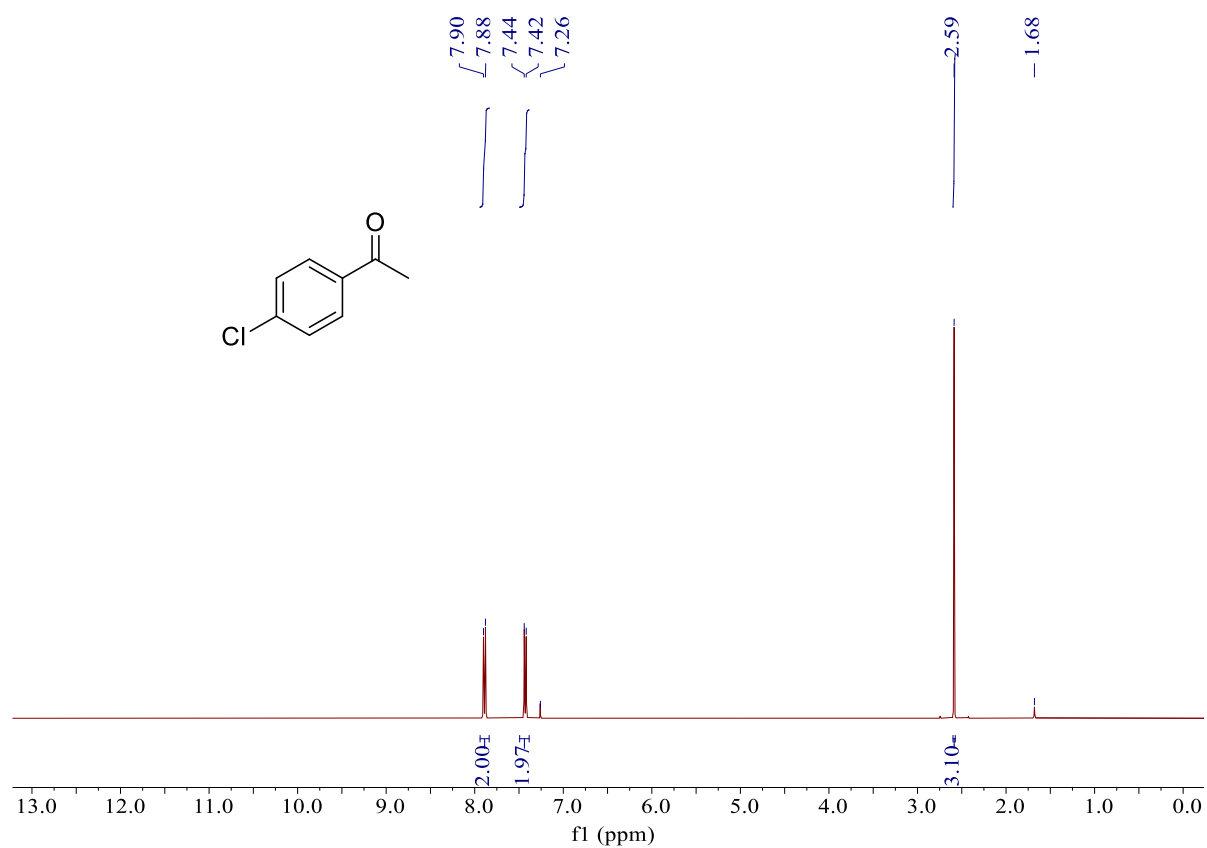

**<sup>13</sup>C NMR of compound 2d:**

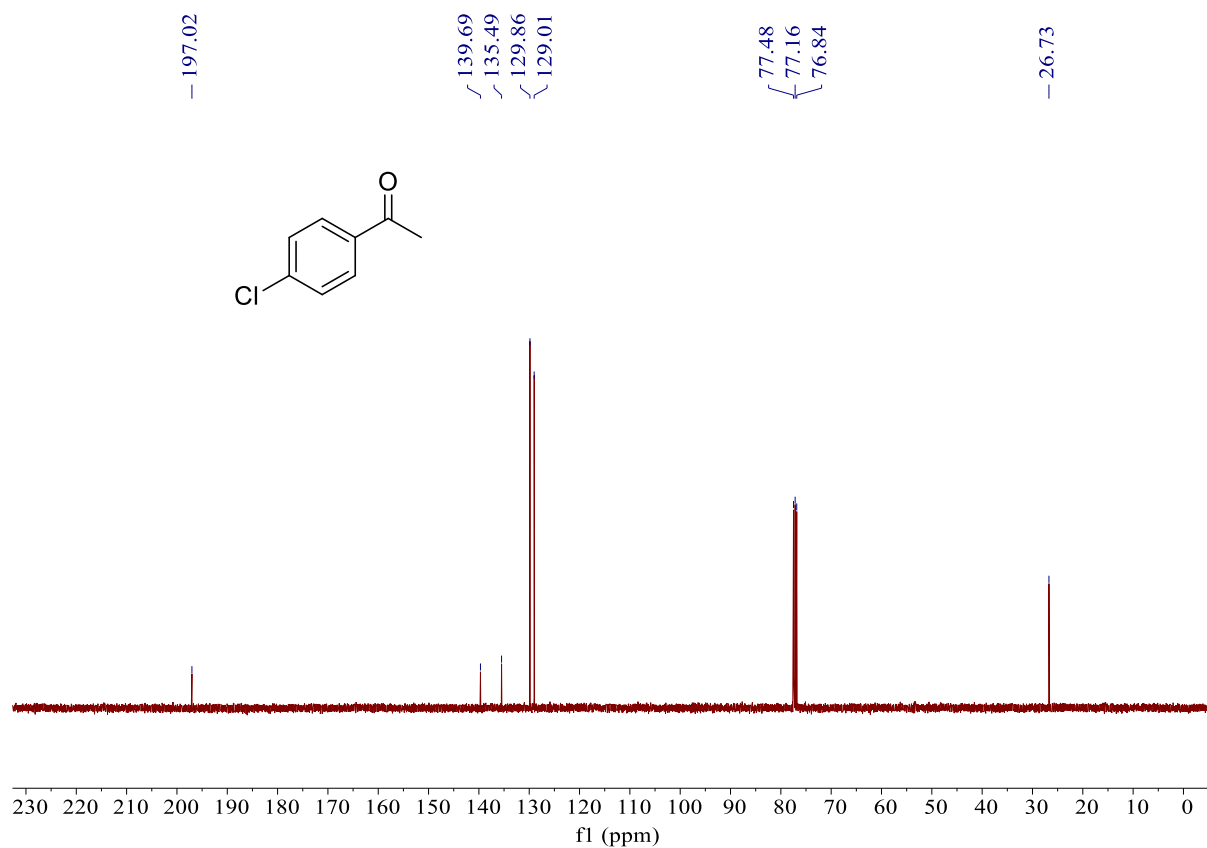

**<sup>1</sup>H NMR of compound 2e:**

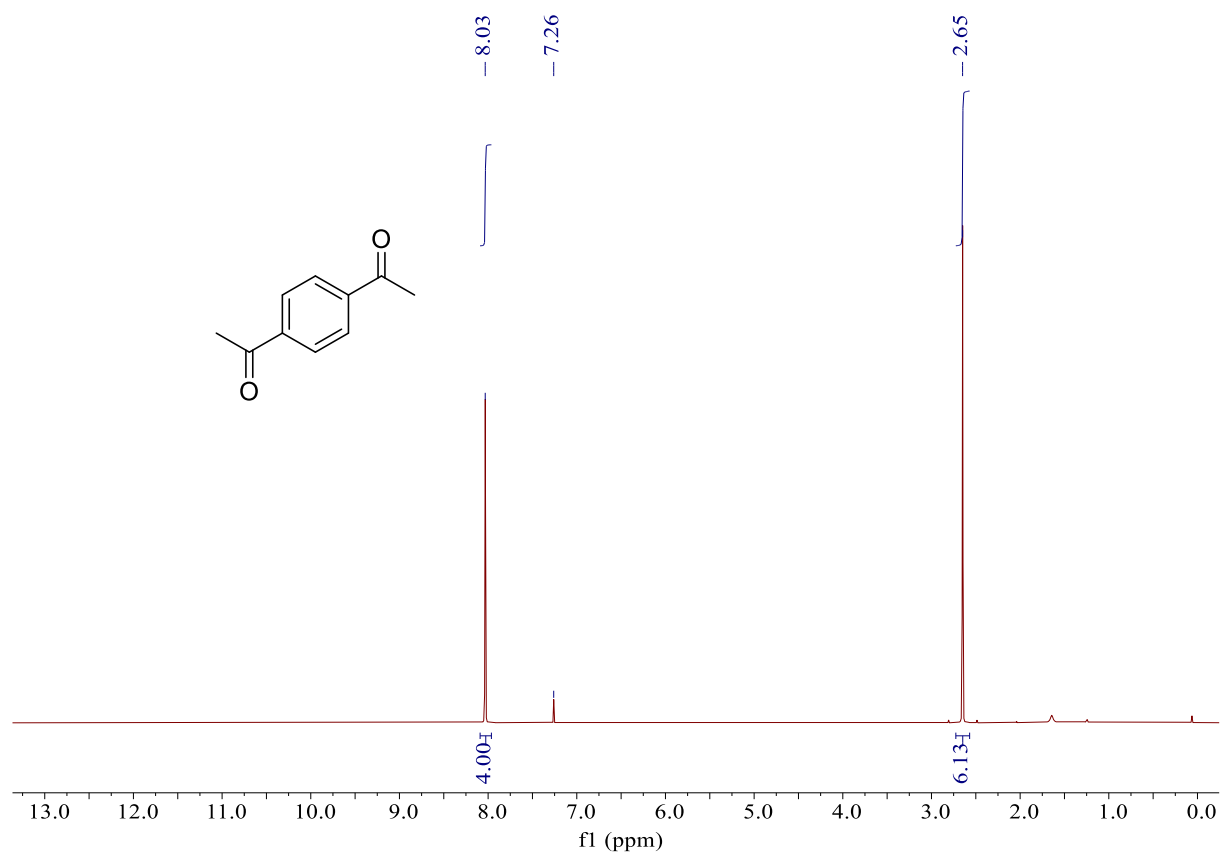

**<sup>13</sup>C NMR of compound 2e:**

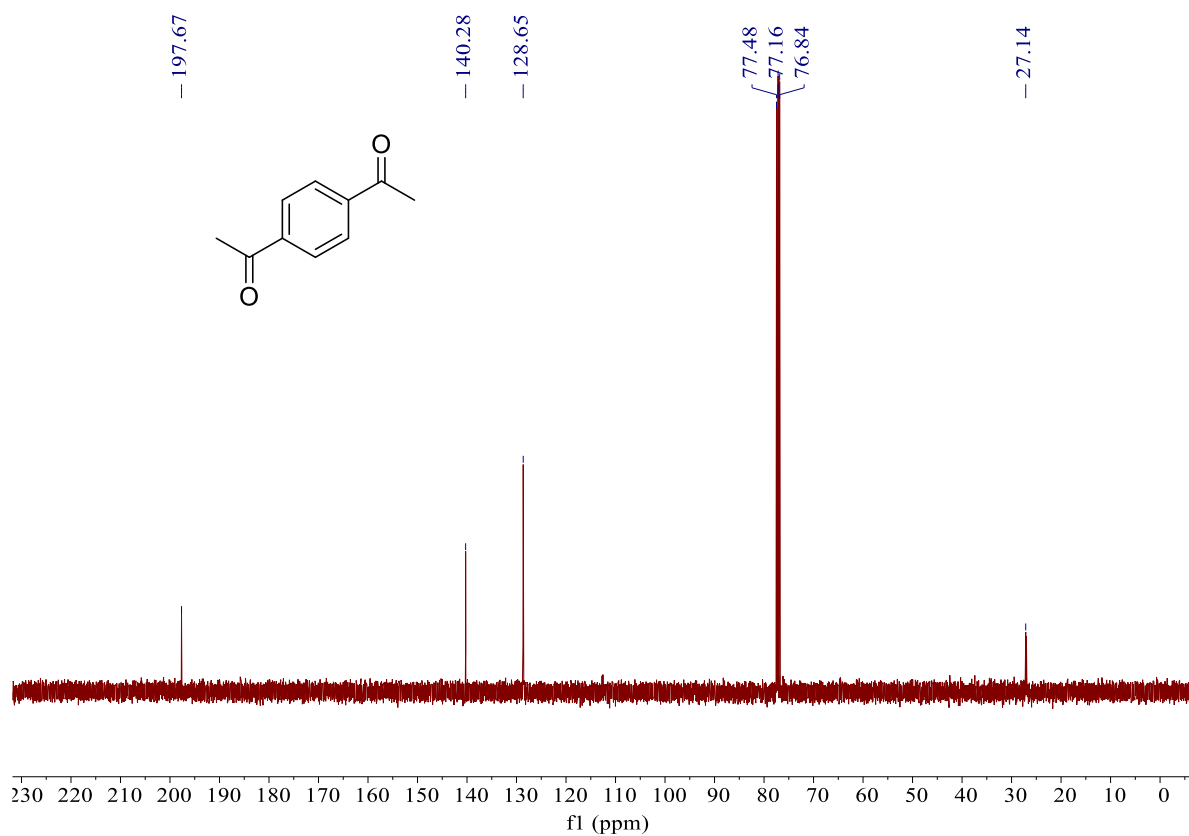

**<sup>1</sup>H NMR of compound 2f:**

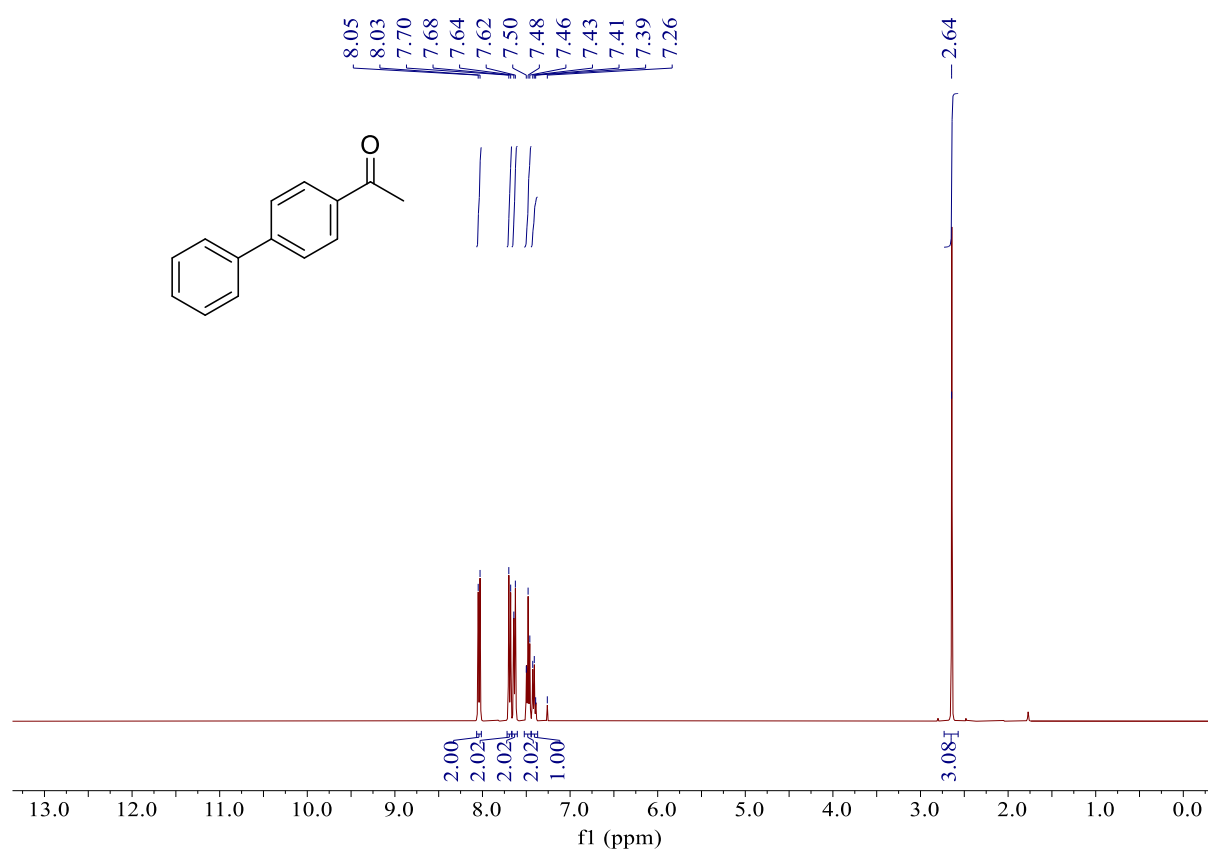

**<sup>13</sup>C NMR of compound 2f:**

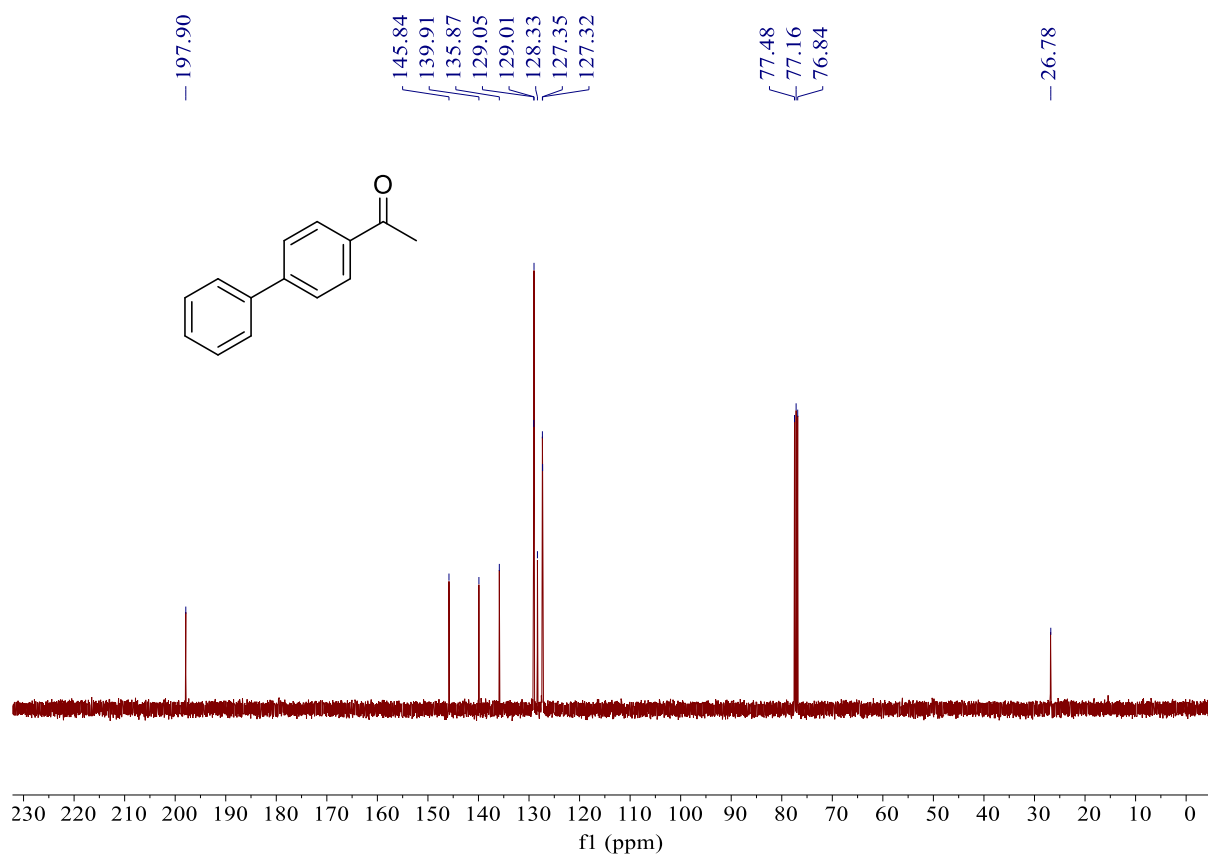

**<sup>1</sup>H NMR of compound 2g:**

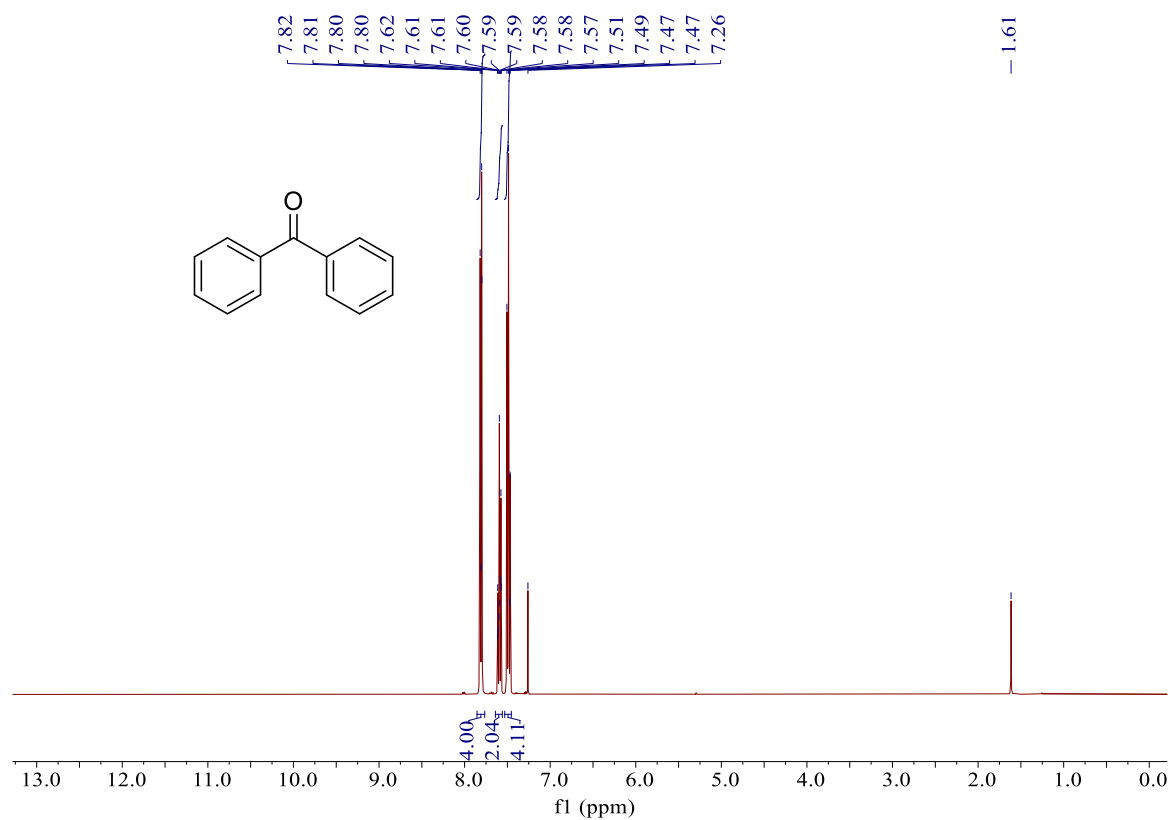

**<sup>13</sup>C NMR of compound 2g:**

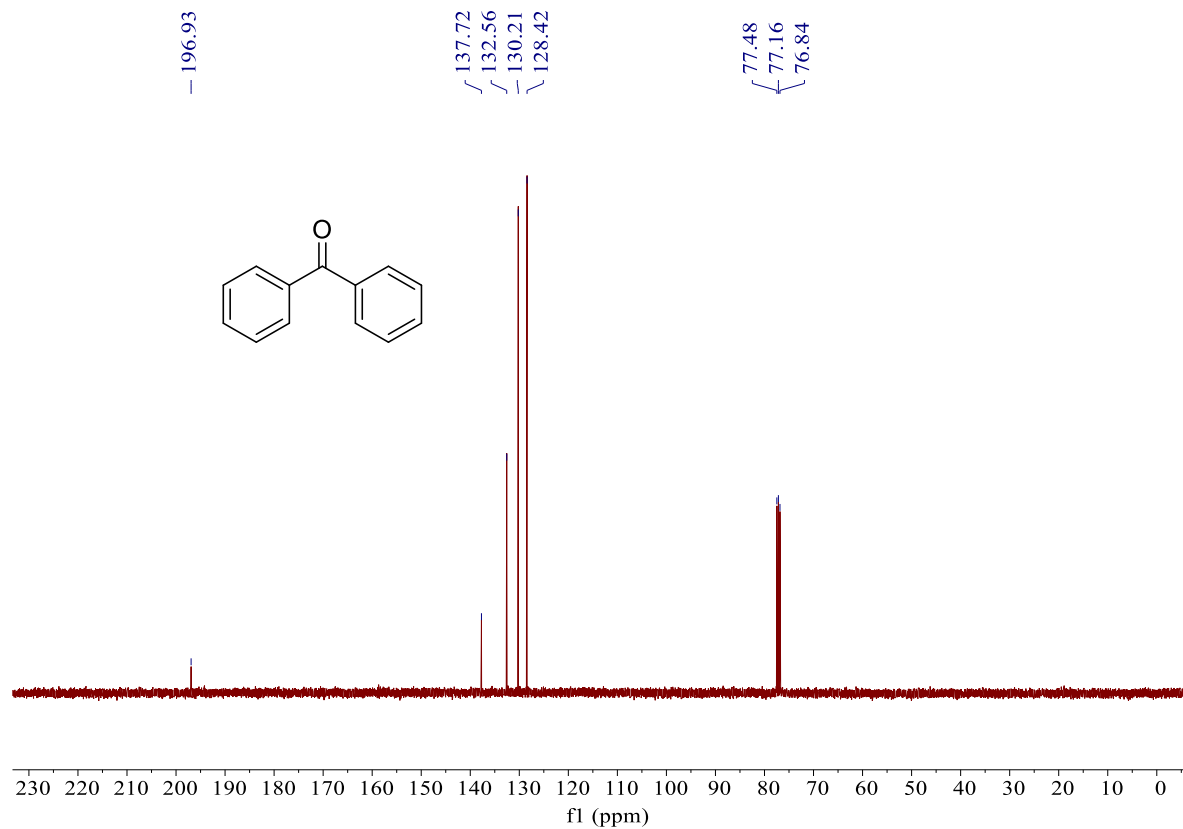

**<sup>1</sup>H NMR of compound 2h:**

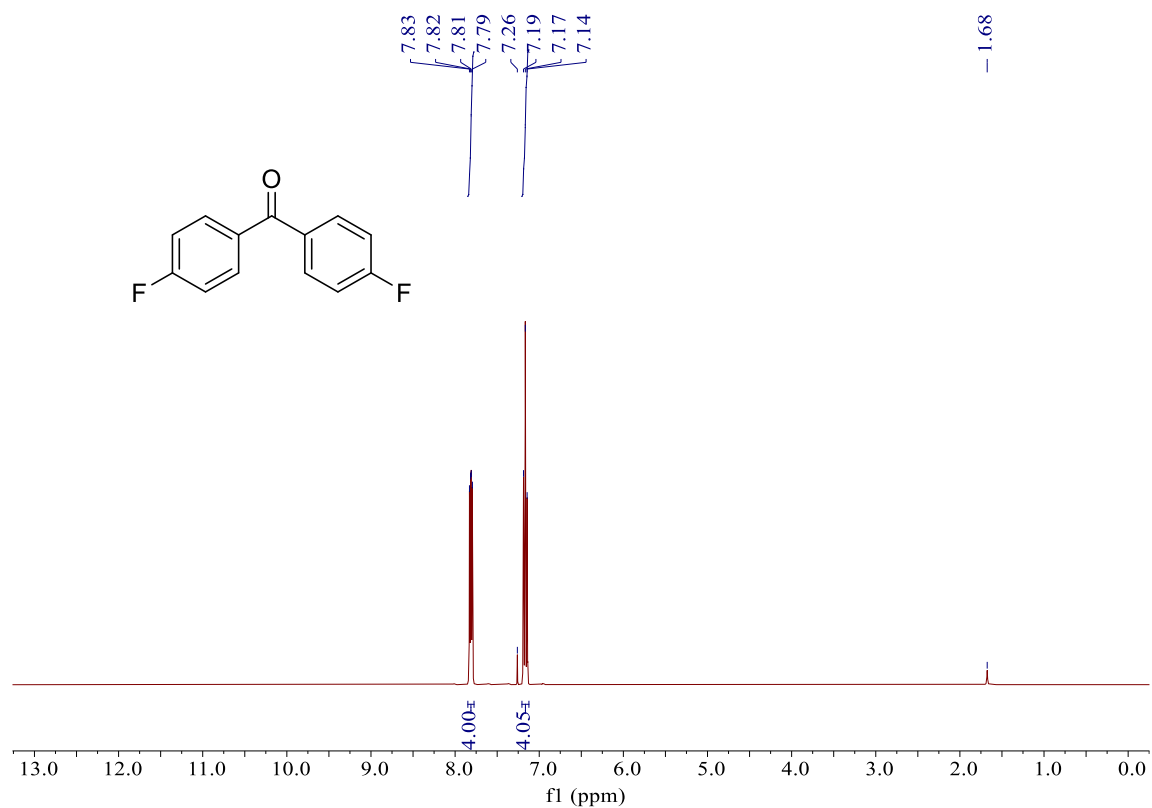

**<sup>13</sup>C NMR of compound 2h:**

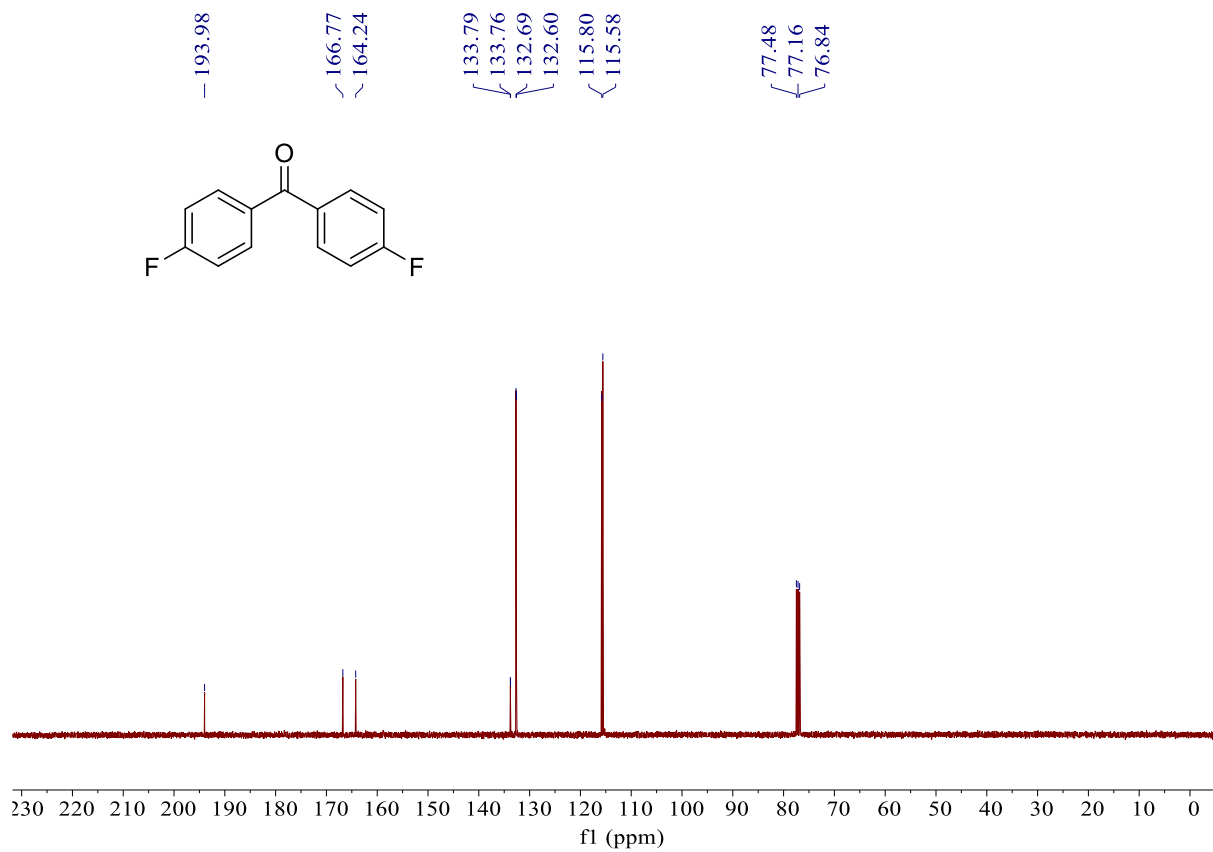



**<sup>1</sup>H NMR of compound 2i:**

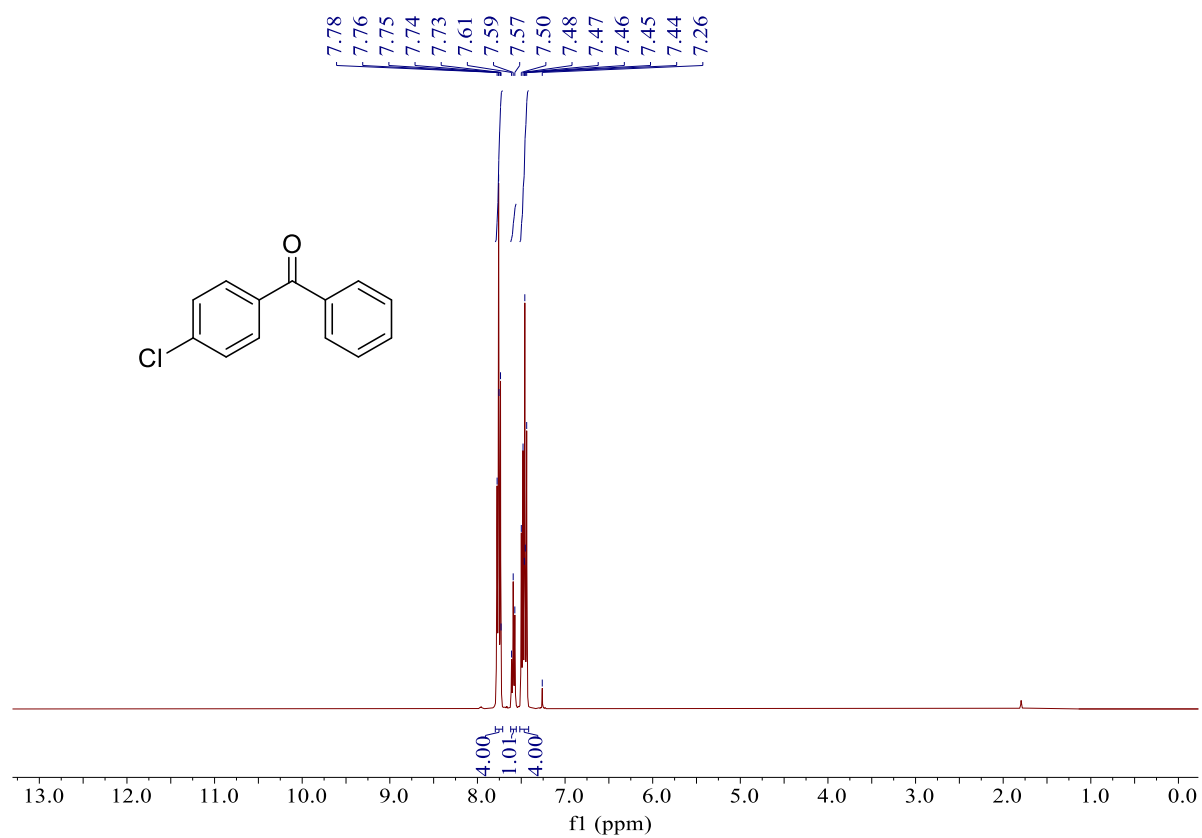

**<sup>13</sup>C NMR of compound 2i:**

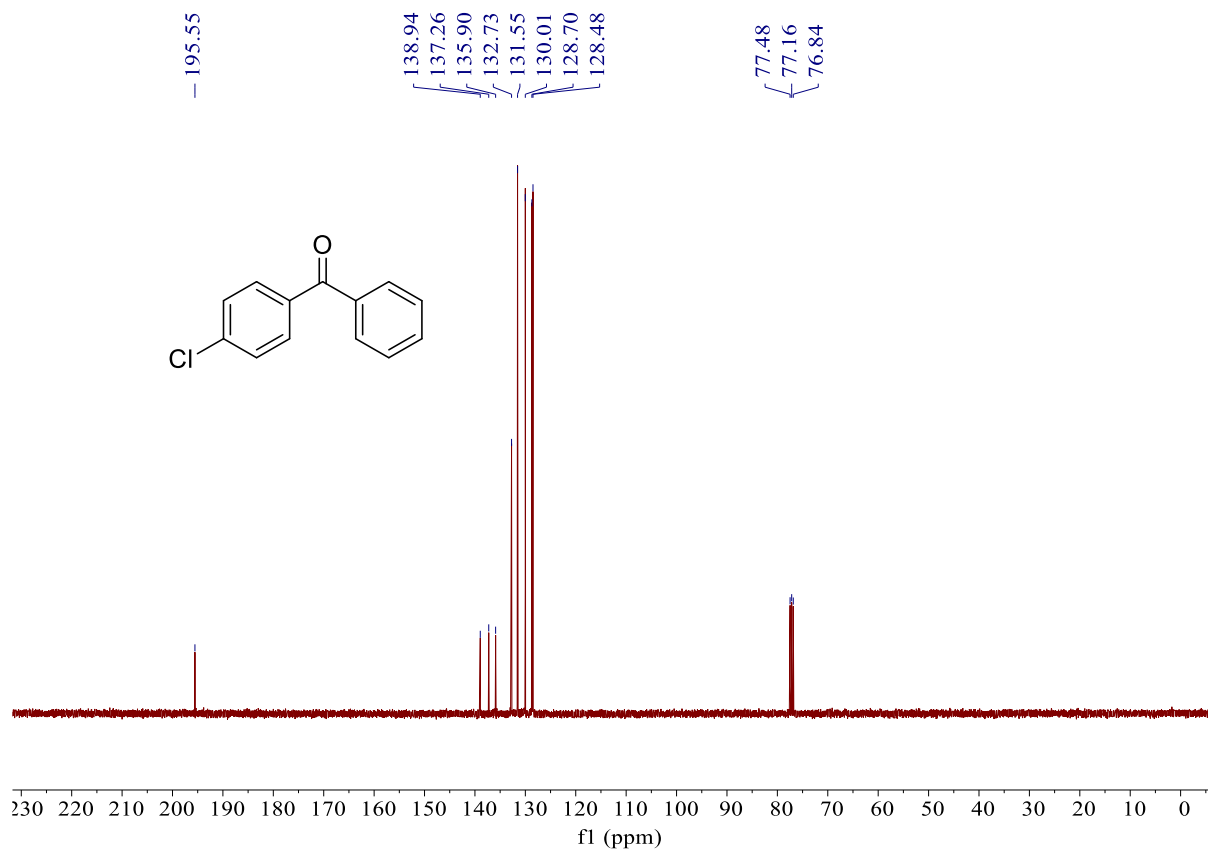

**<sup>1</sup>H NMR of compound 2j:**

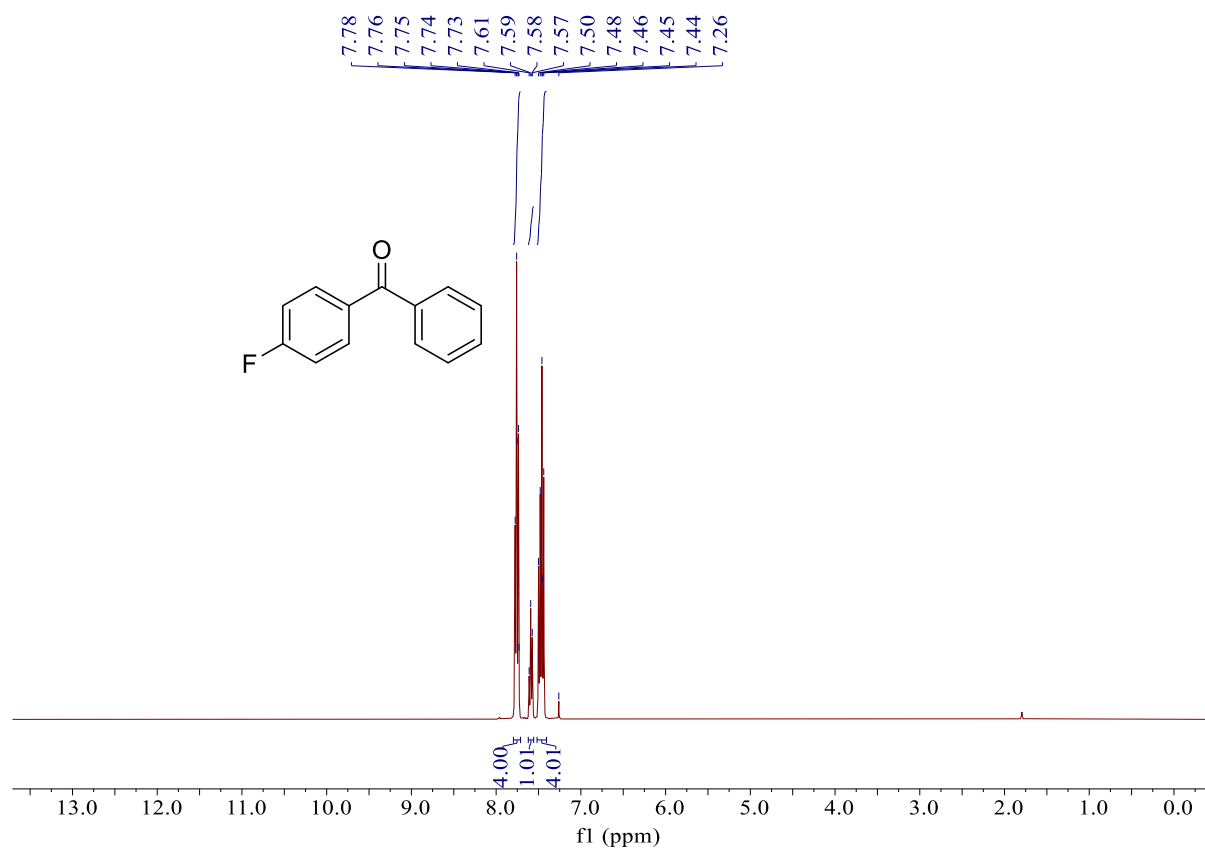

**<sup>13</sup>C NMR of compound 2j:**

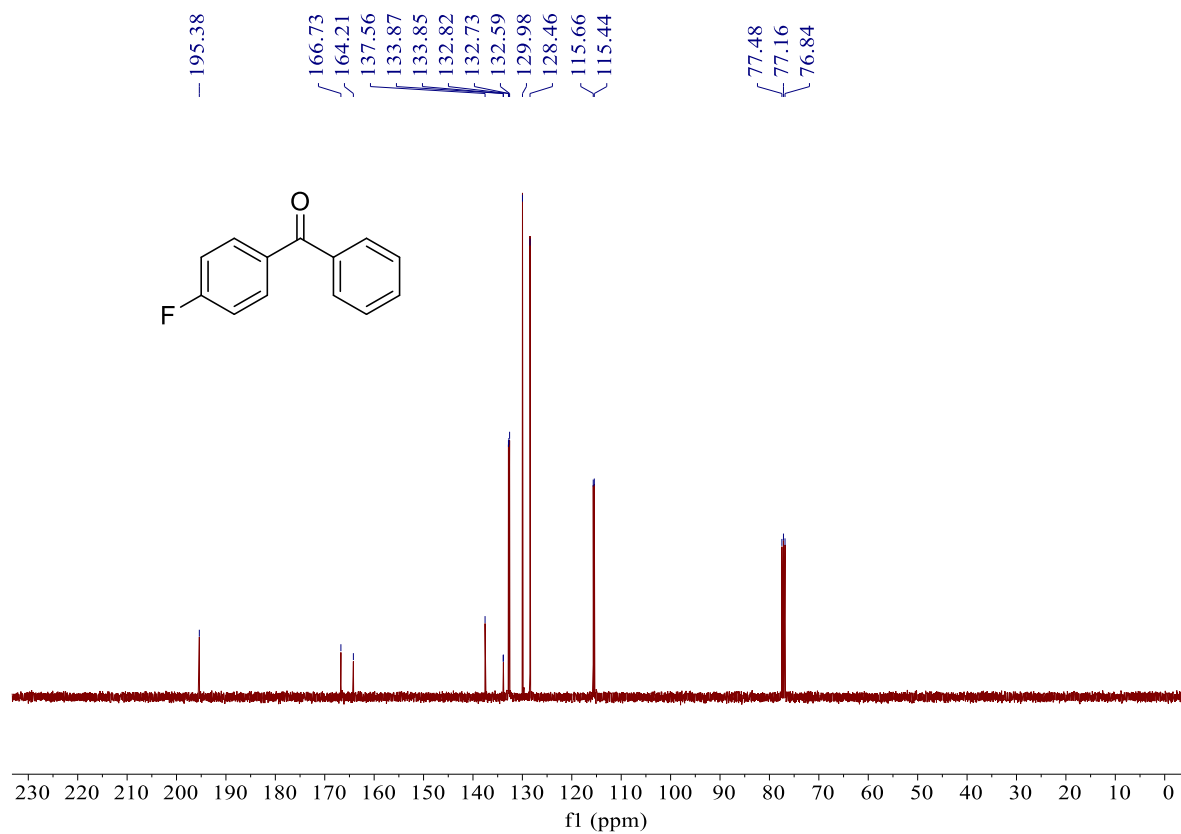

**<sup>1</sup>H NMR of compound 2k:**

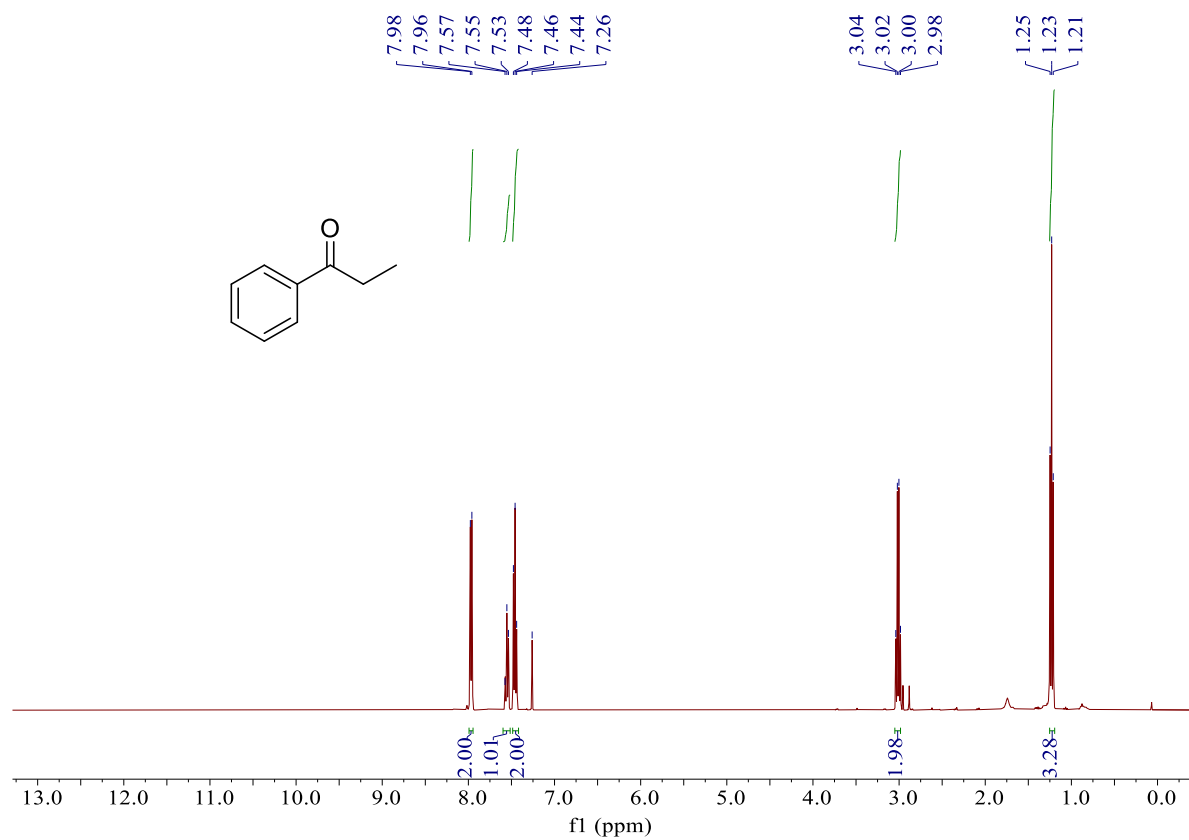

**<sup>13</sup>C NMR of compound 2k:**

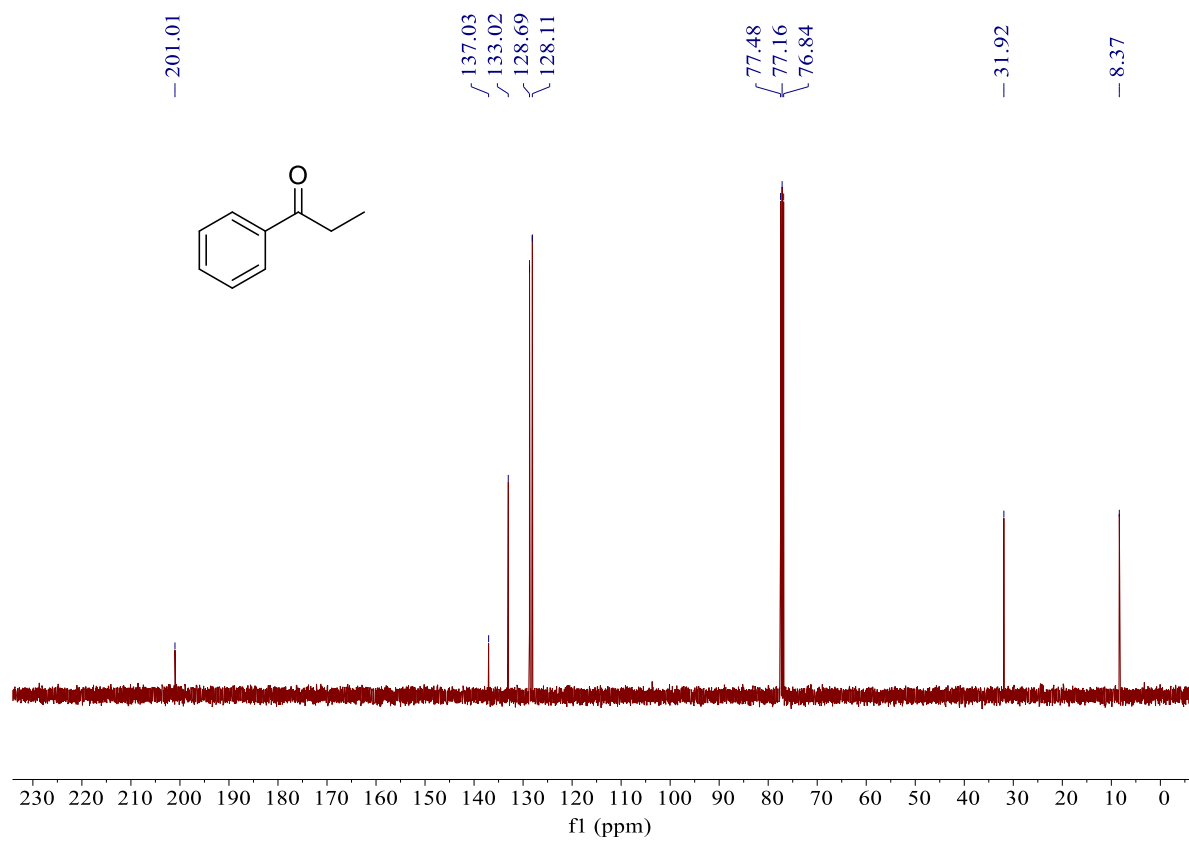

**<sup>1</sup>H NMR of compound 2l:**

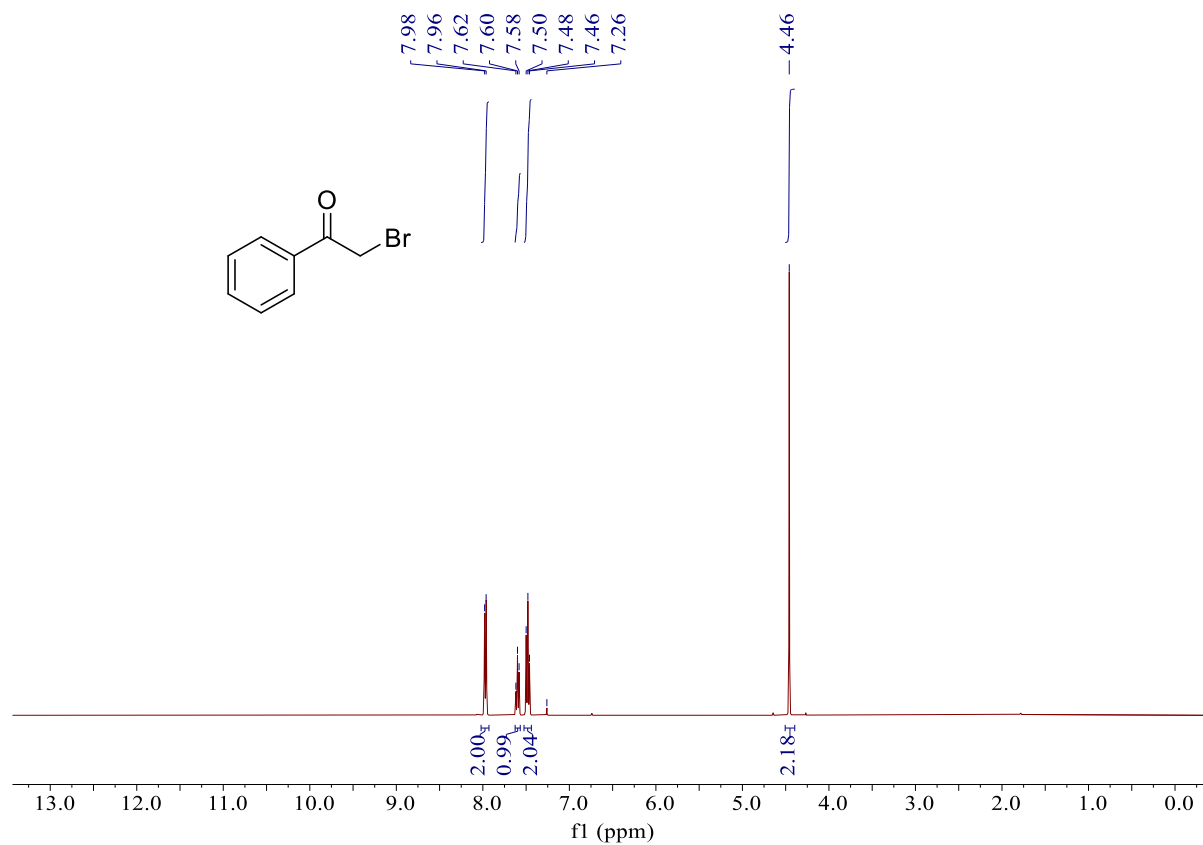

**<sup>13</sup>C NMR of compound 2l:**

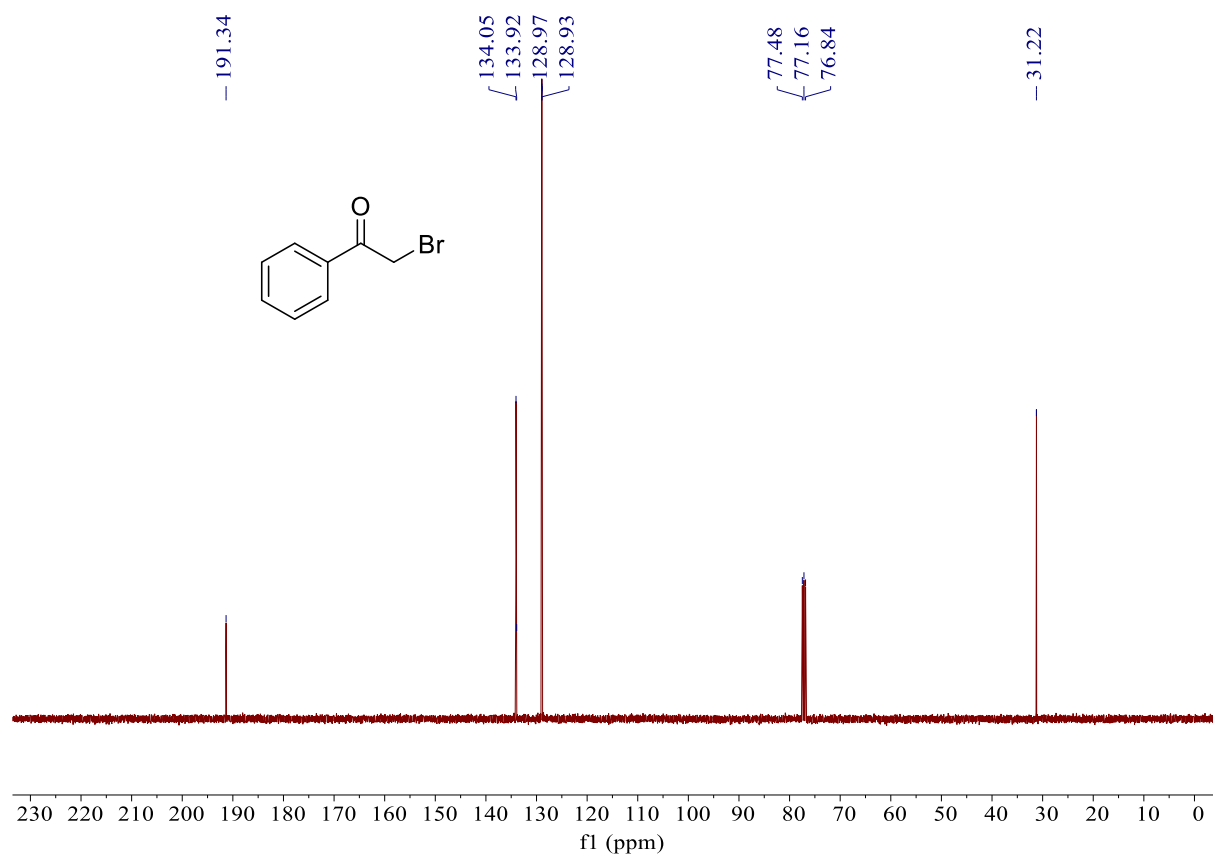

**<sup>1</sup>H NMR of compound 2m:**

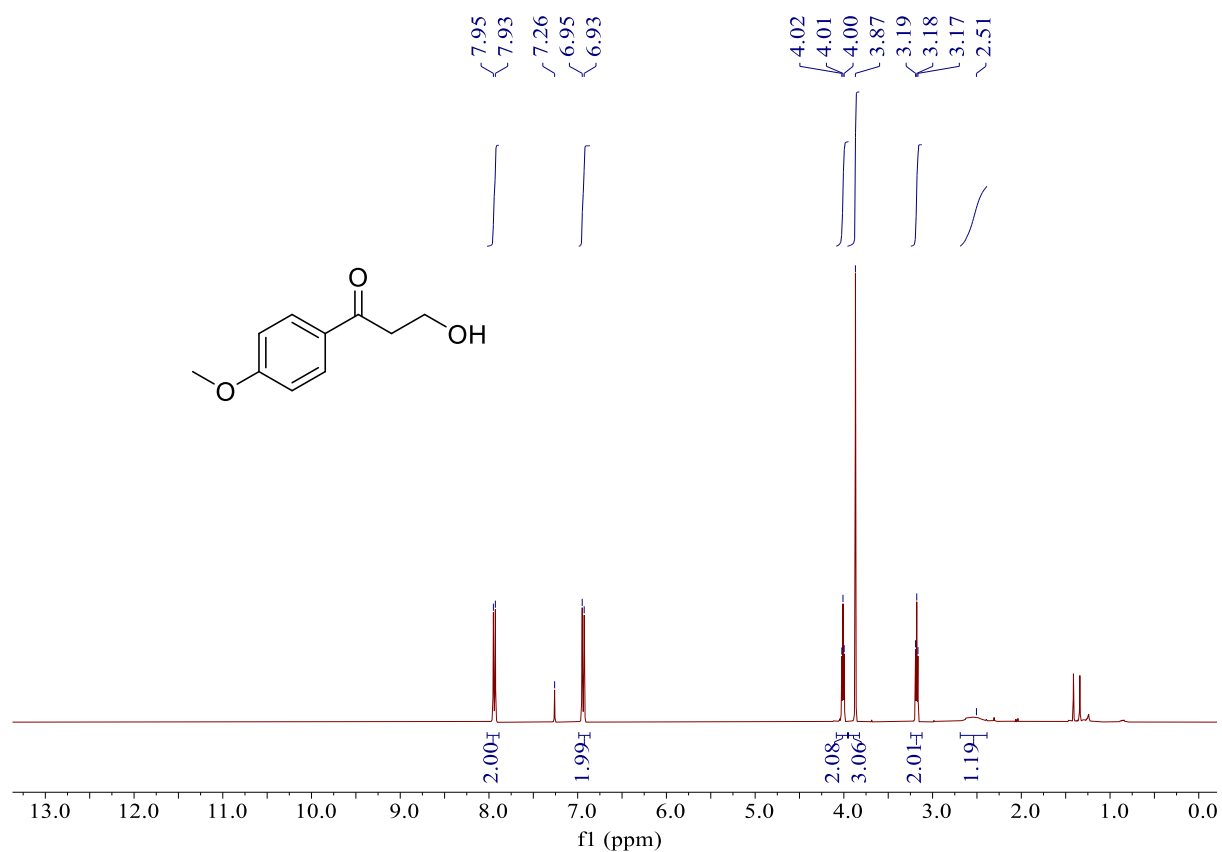

**<sup>13</sup>C NMR of compound 2m:**

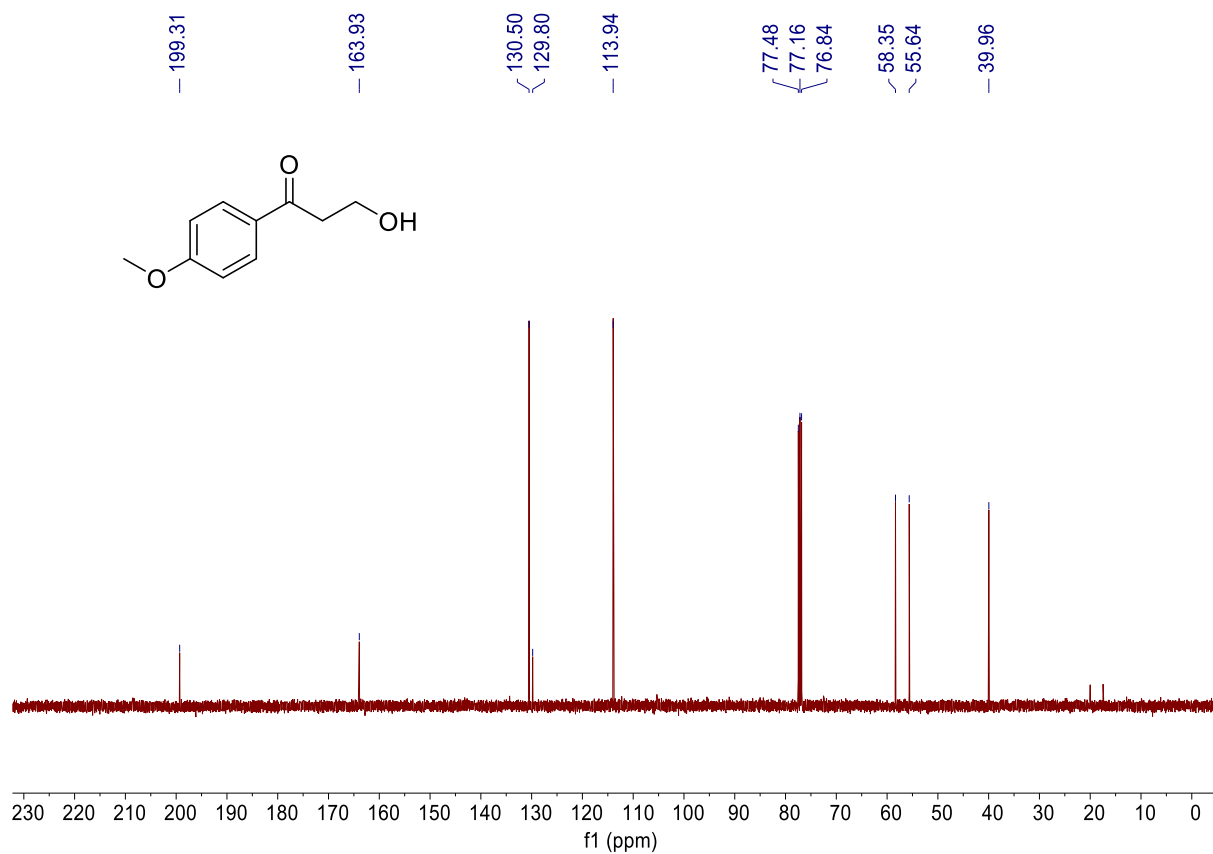

**<sup>1</sup>H NMR of compound 2n:**

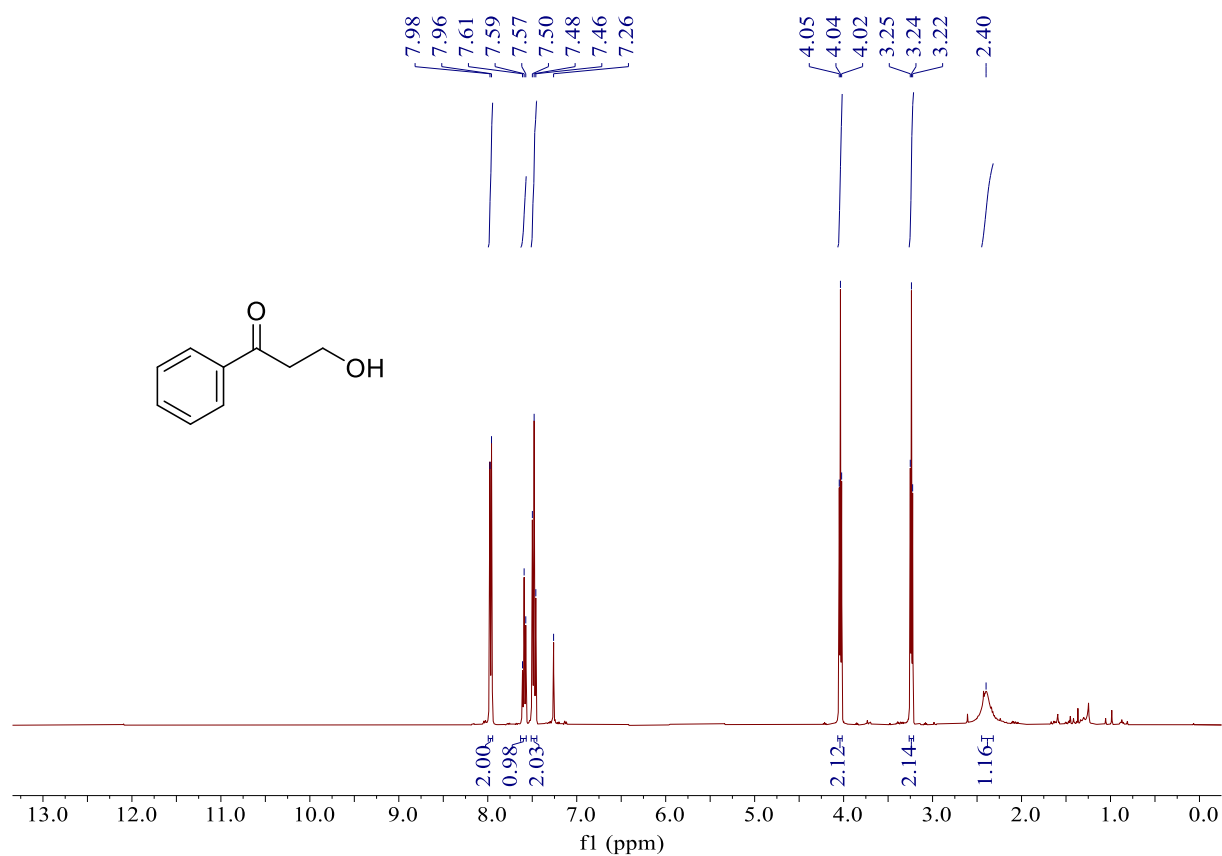

**<sup>13</sup>C NMR of compound 2n:**

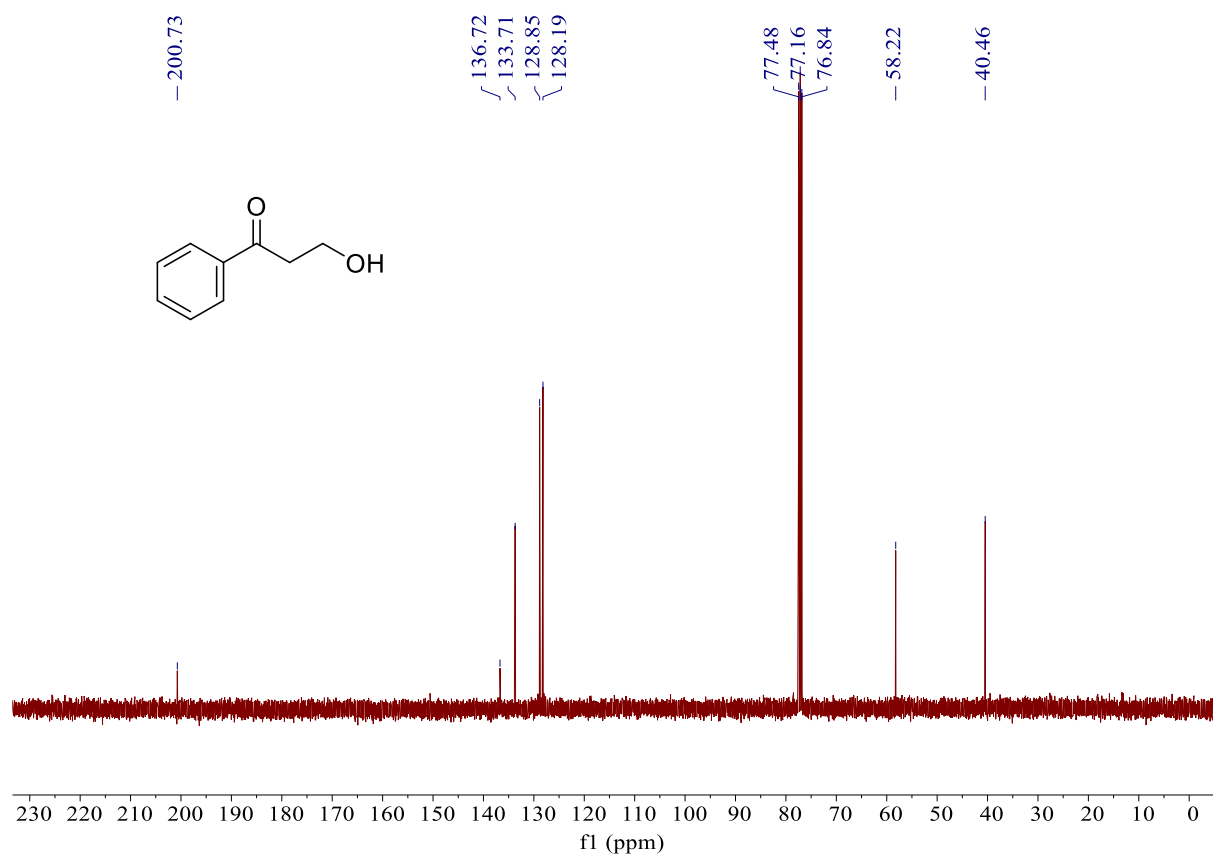

**<sup>1</sup>H NMR of compound 2o:**

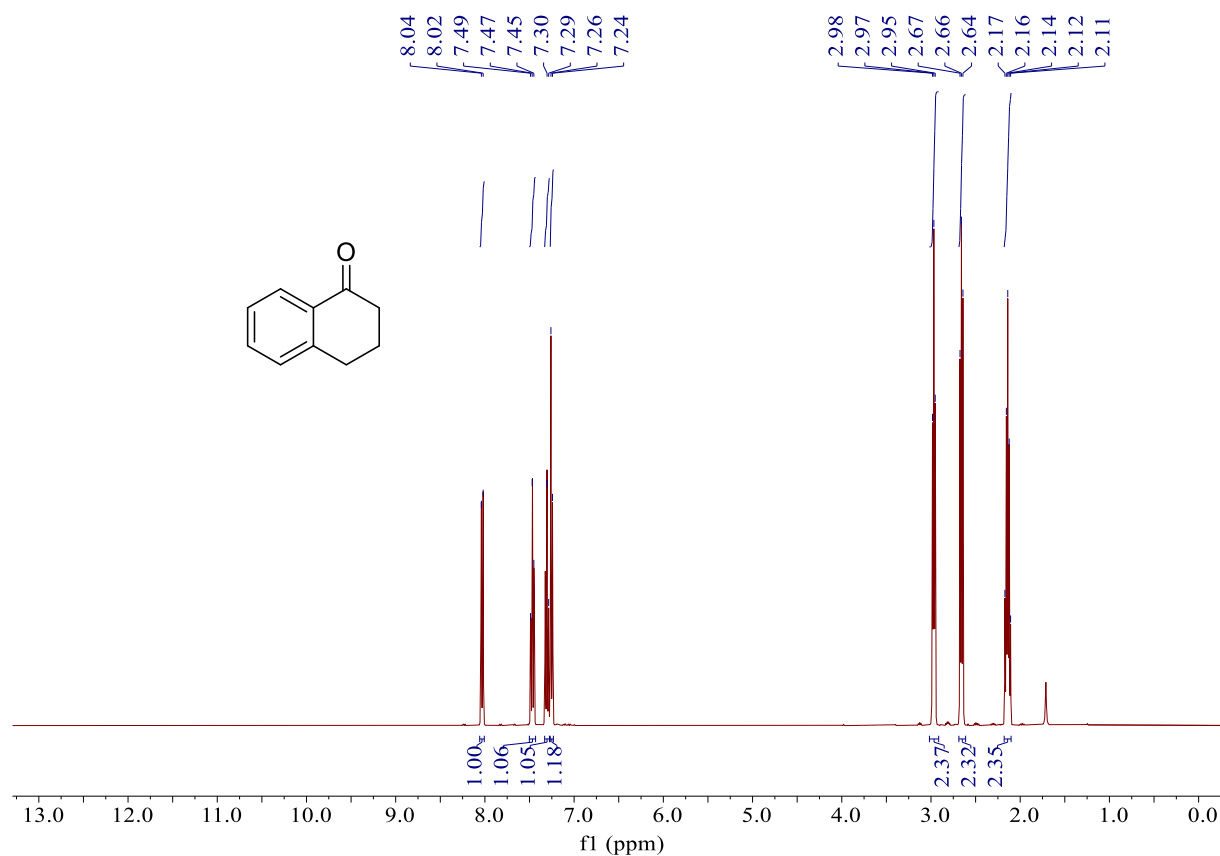

**<sup>13</sup>C NMR of compound 2o:**

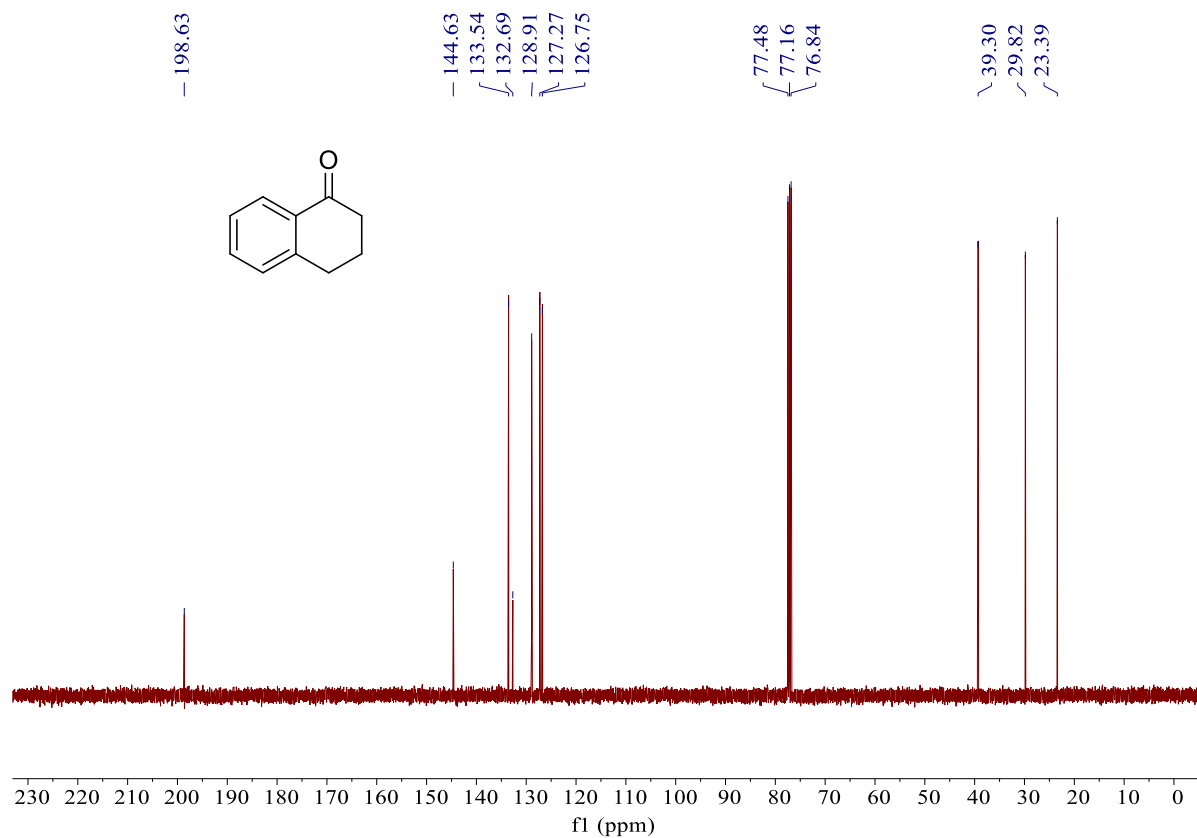

### <sup>1</sup>H NMR of compound 2p:

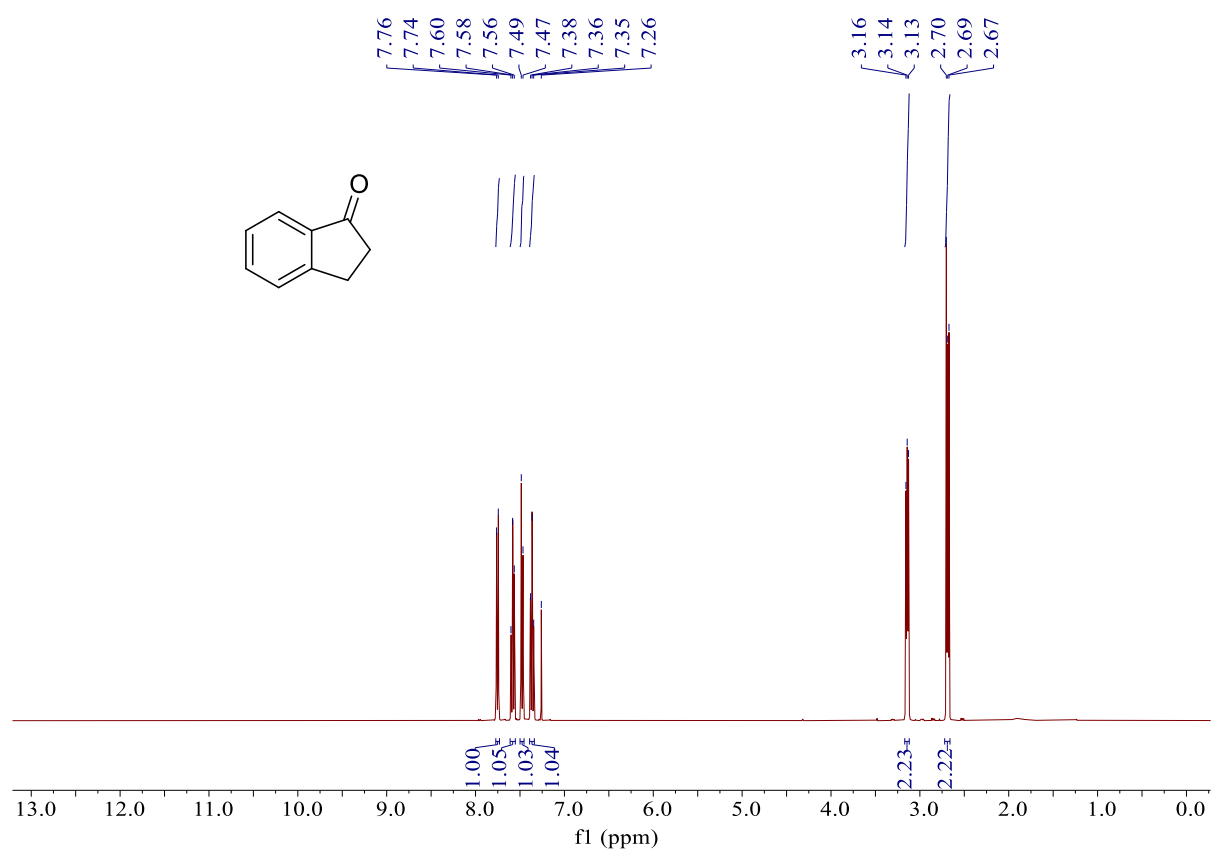

### <sup>13</sup>C NMR of compound 2p:

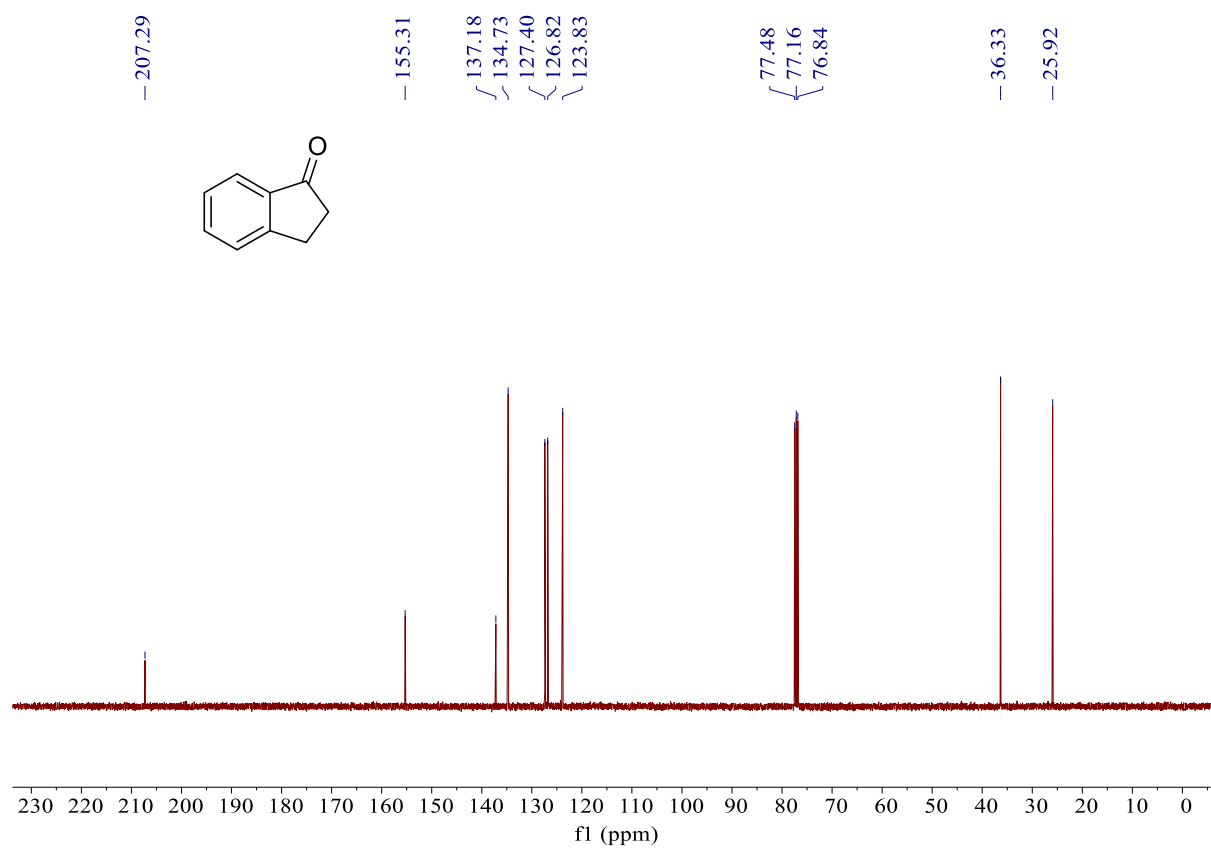



**<sup>1</sup>H NMR of compound 2q:**

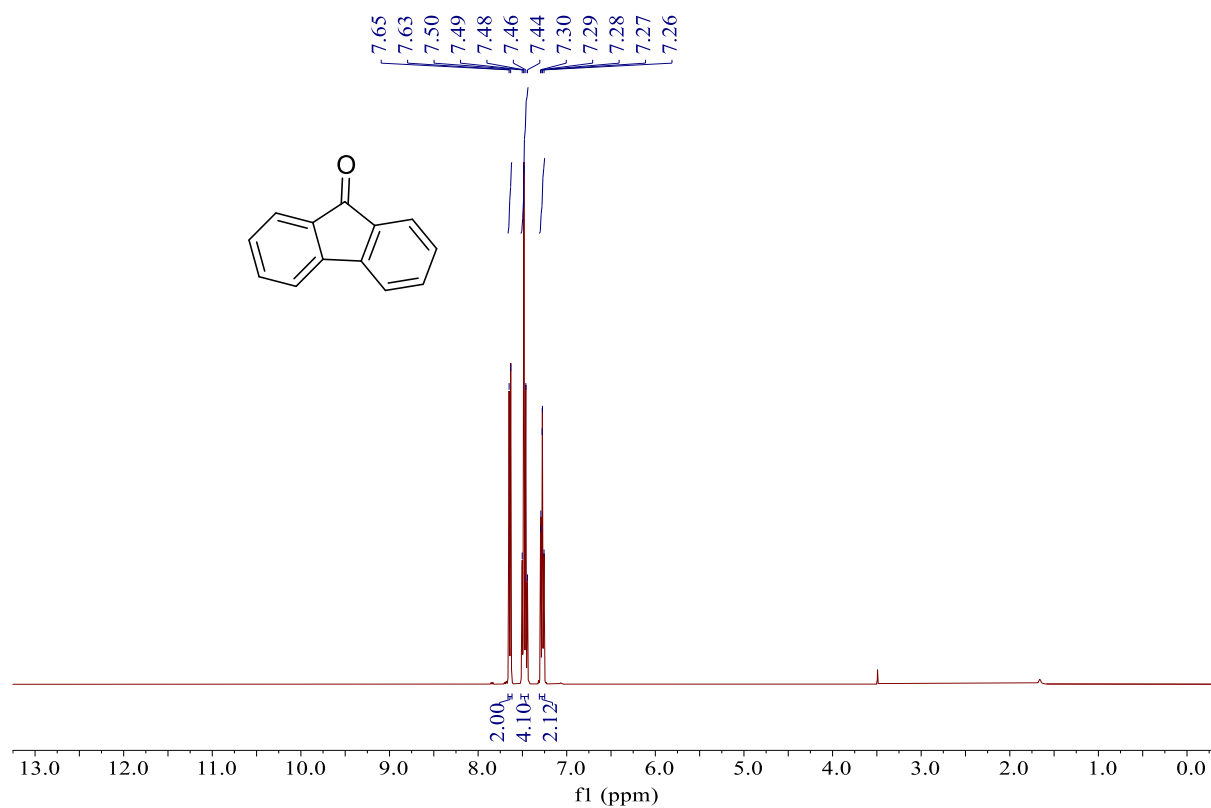

**<sup>13</sup>C NMR of compound 2q:**

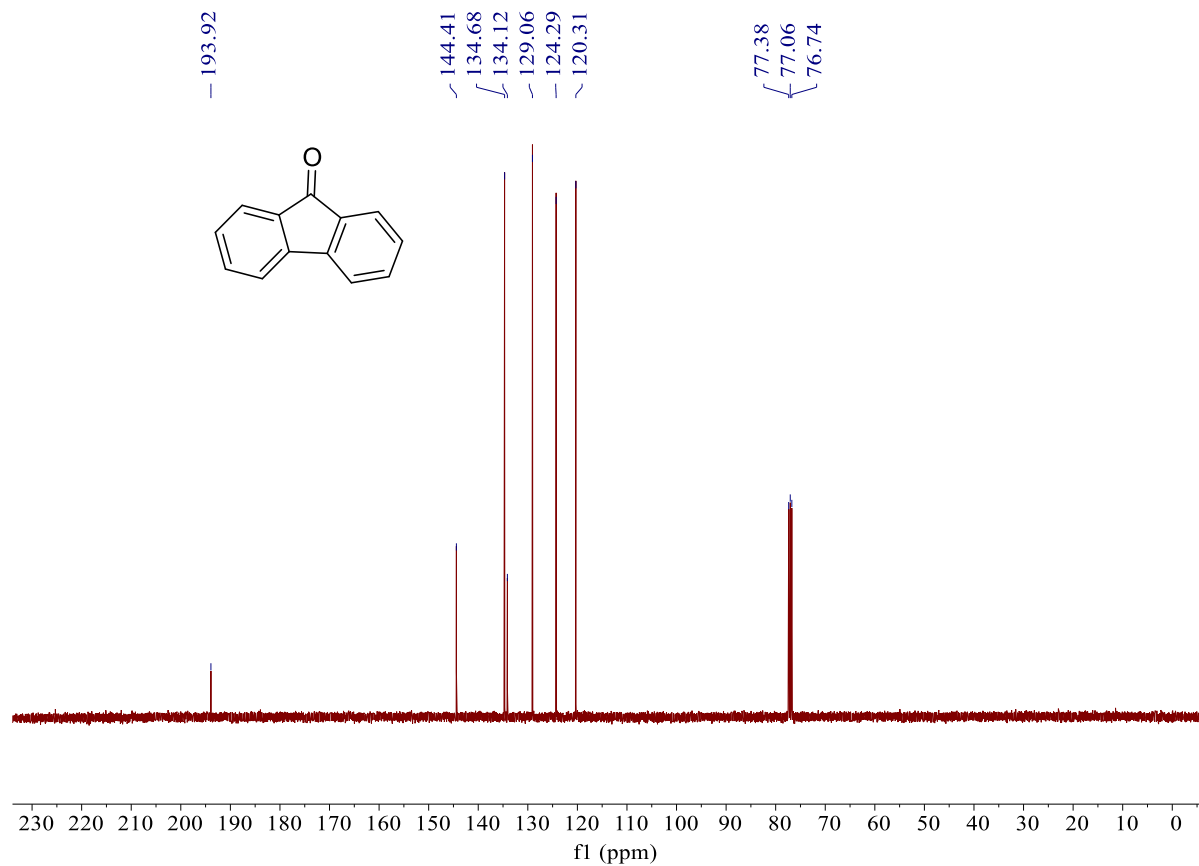

**<sup>1</sup>H NMR of compound 2r:**

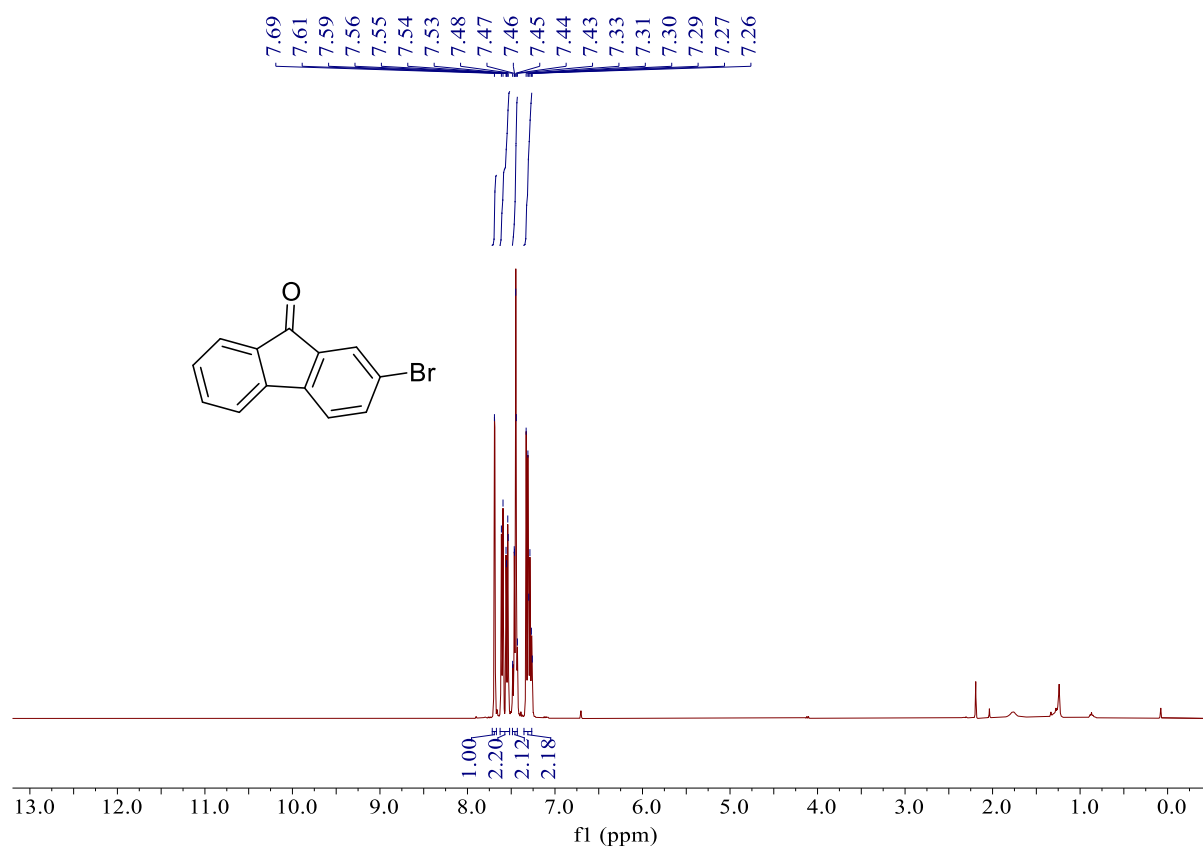

**<sup>13</sup>C NMR of compound 2r:**

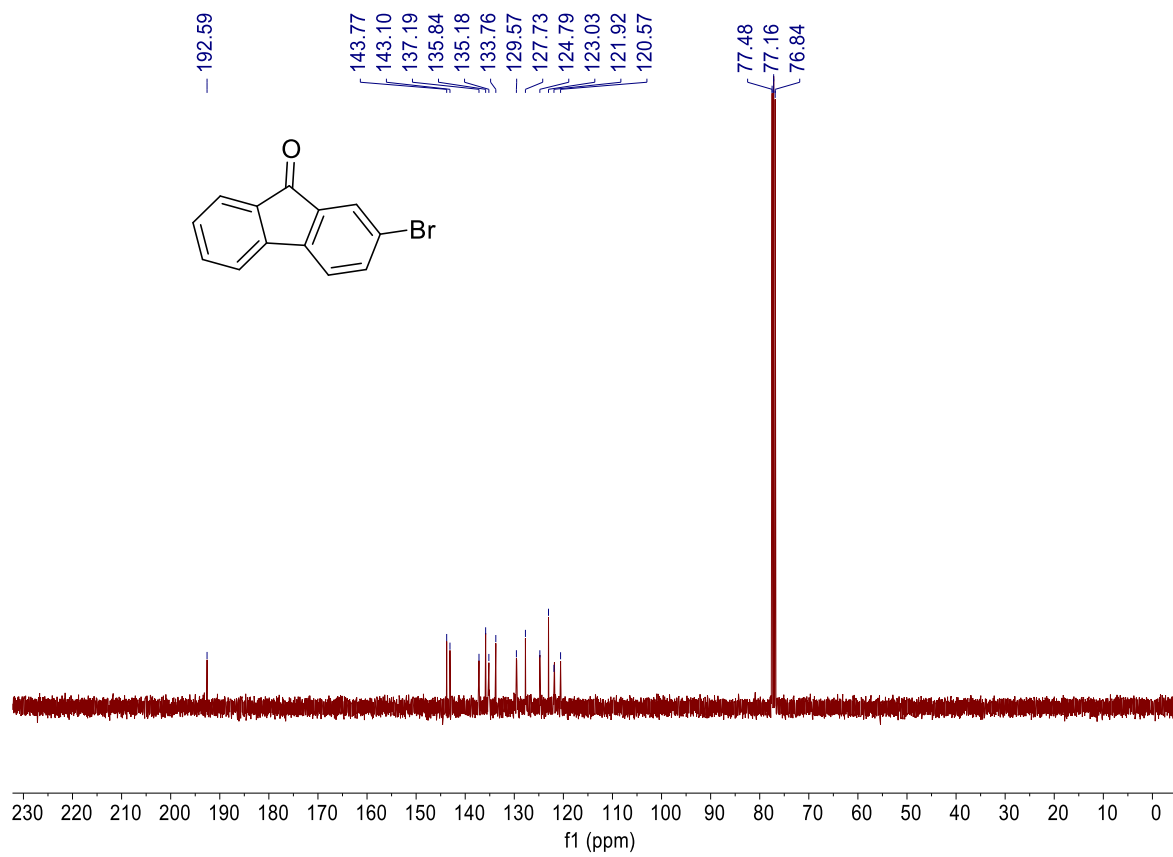

**<sup>1</sup>H NMR of compound 2s:**

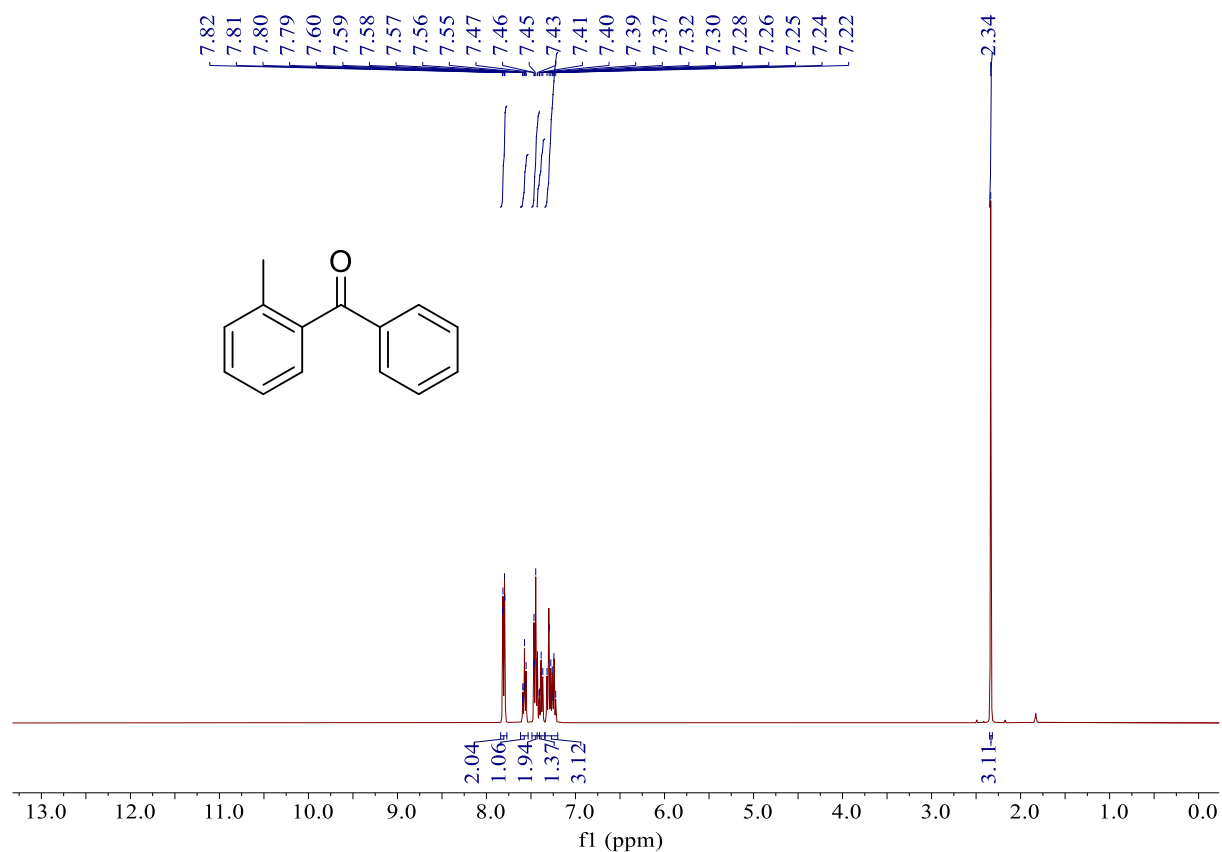

**<sup>13</sup>C NMR of compound 2s:**

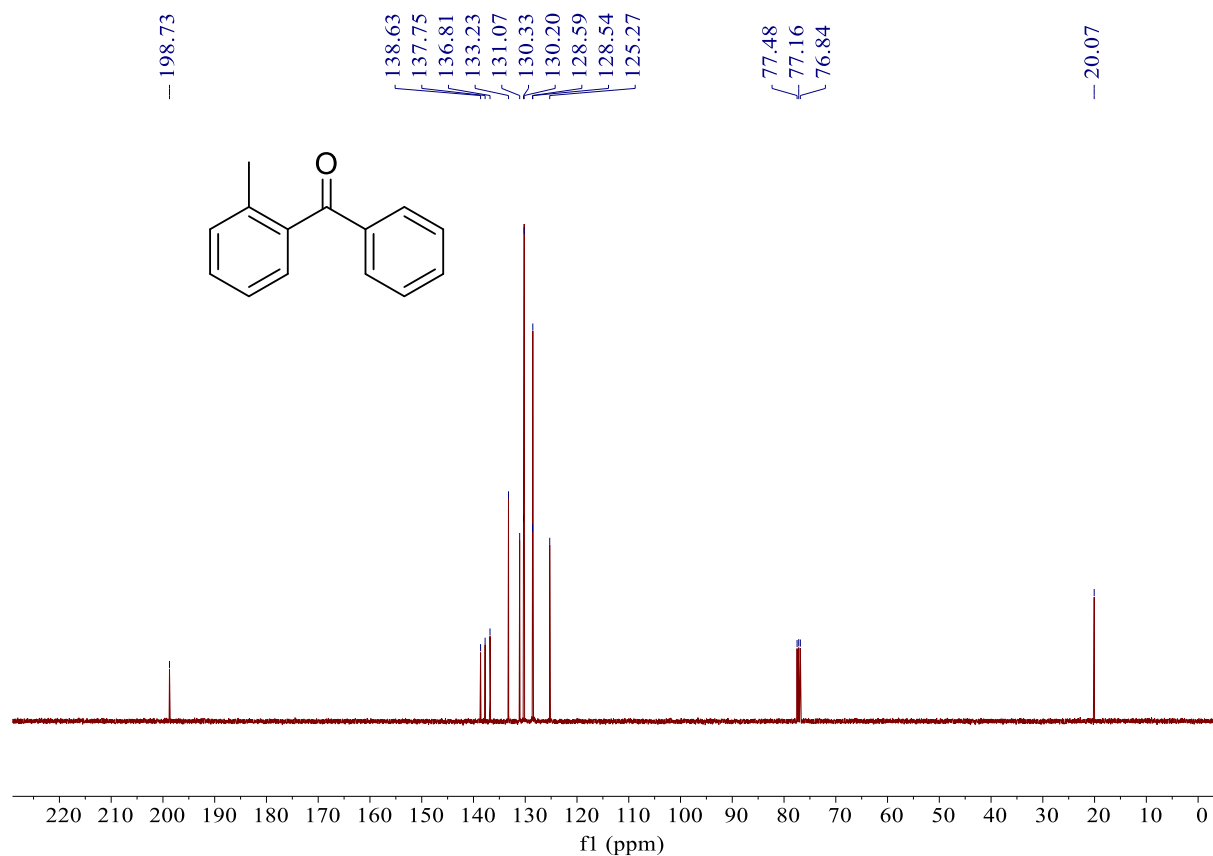

**<sup>1</sup>H NMR of compound 2t:**

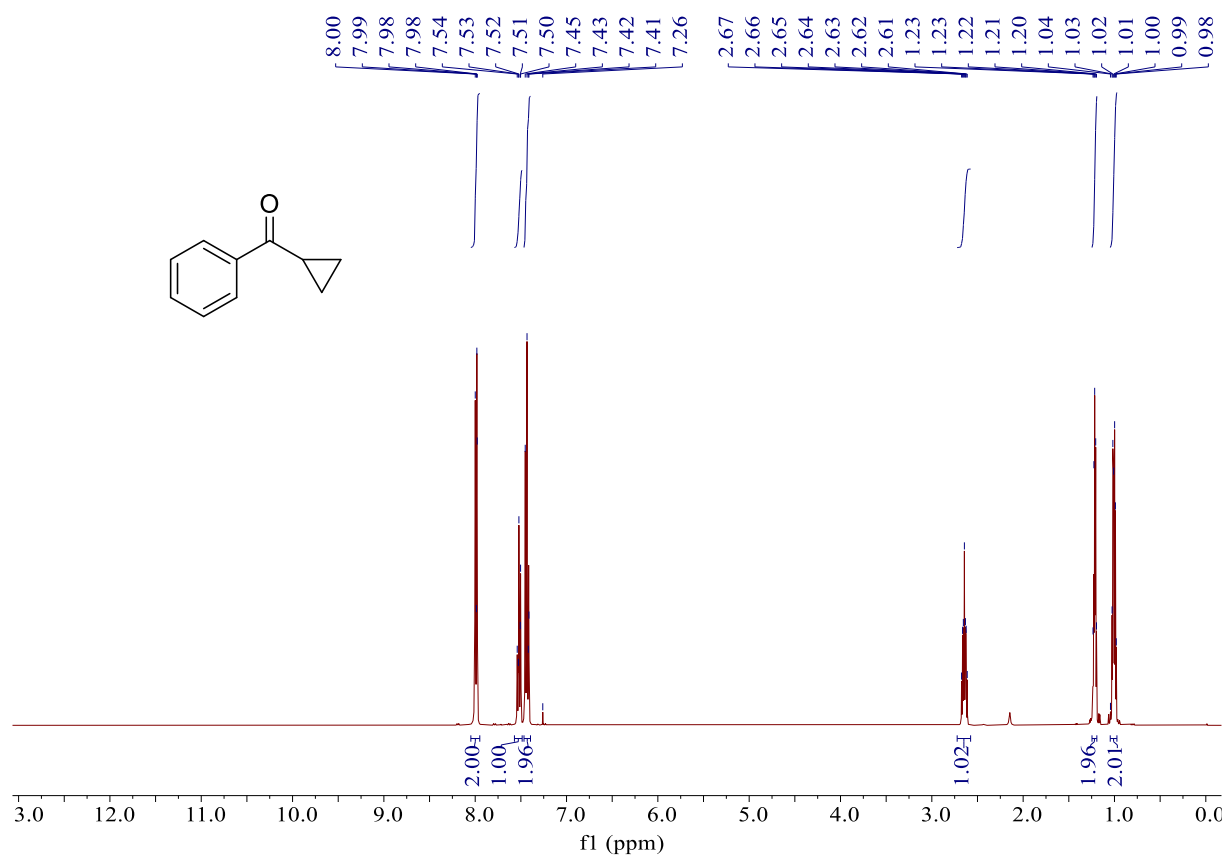

**<sup>13</sup>C NMR of compound 2t:**

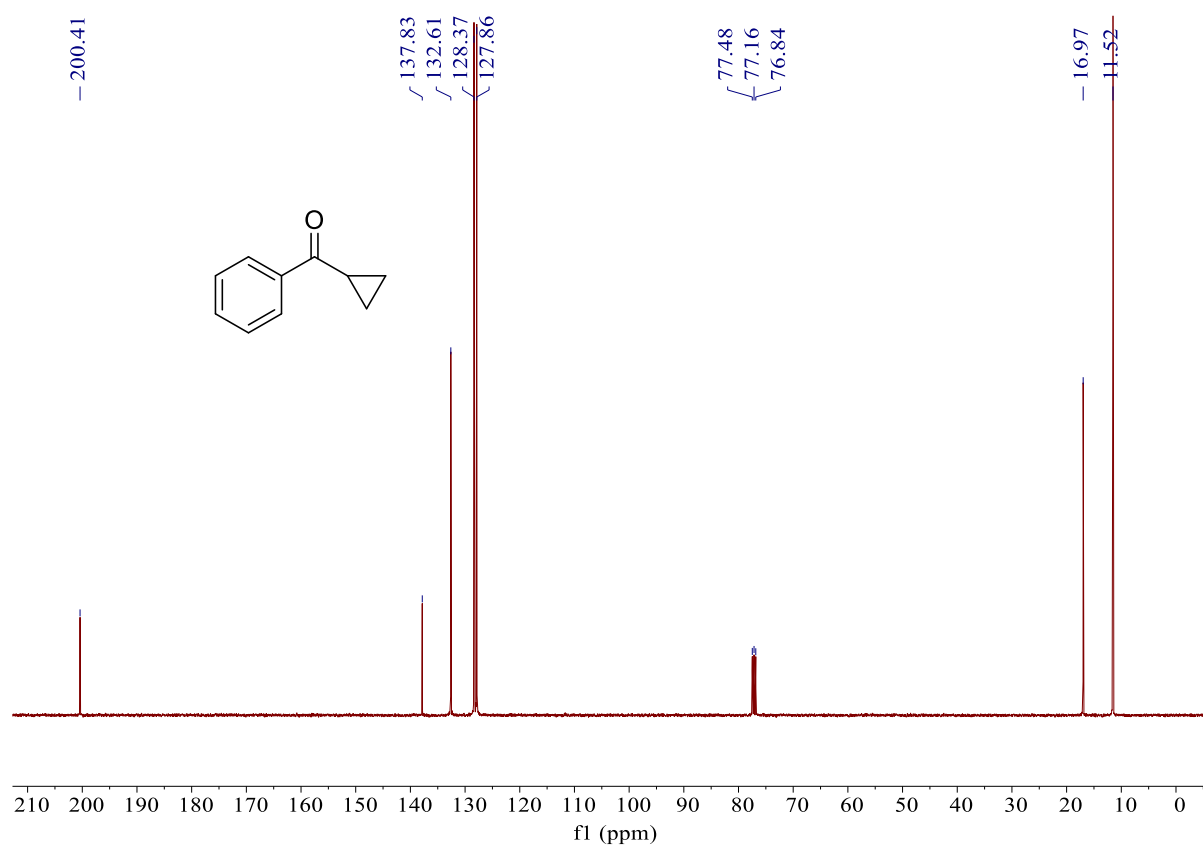

**<sup>1</sup>H NMR of compound 2v:**

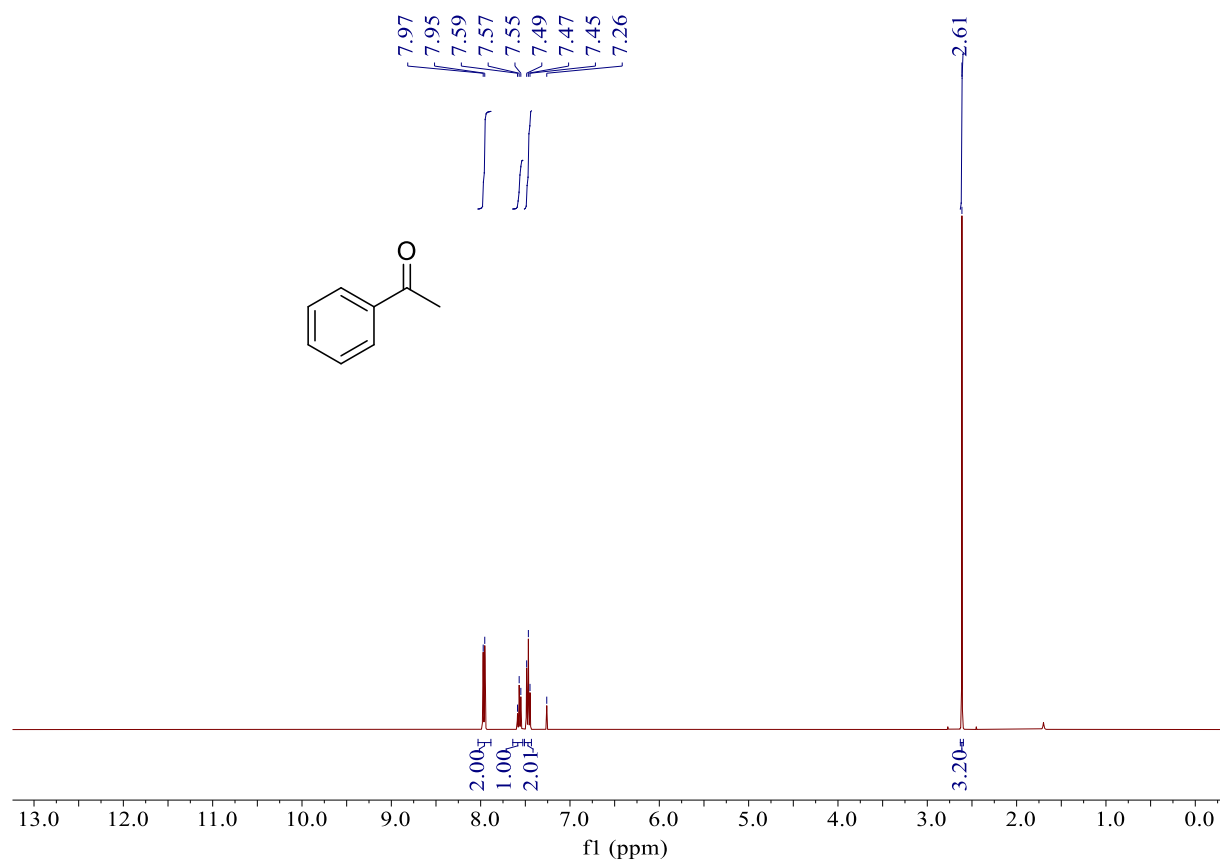

**<sup>13</sup>C NMR of compound 2v:**

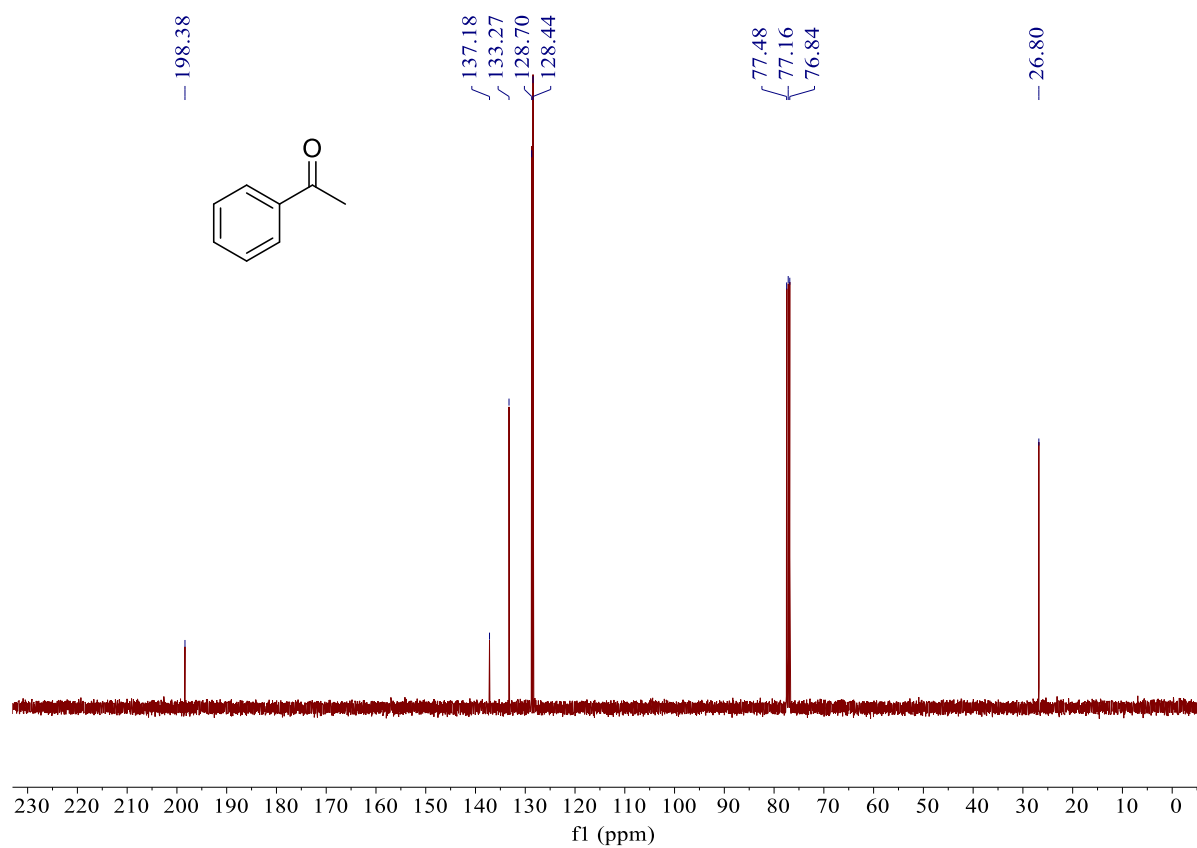

**<sup>1</sup>H NMR of compound 2w:**

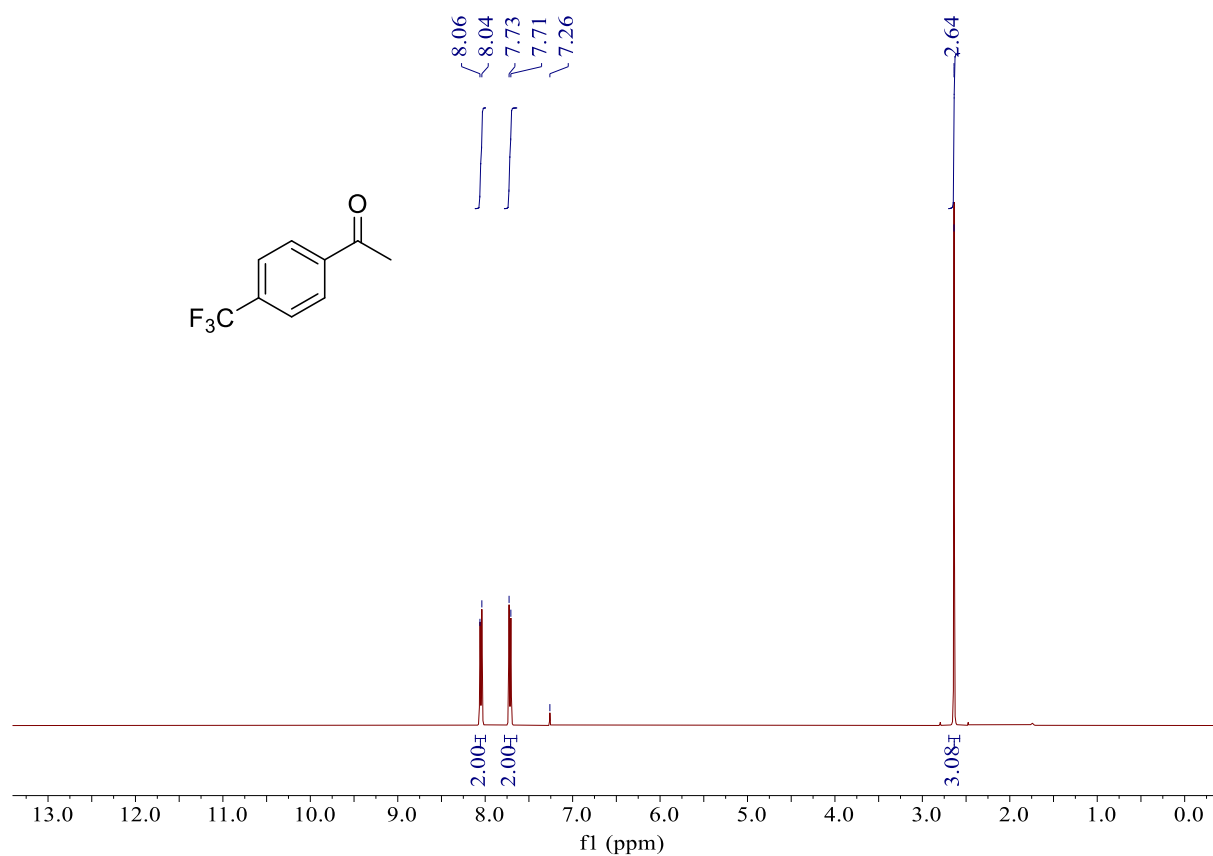

**<sup>13</sup>C NMR of compound 2w:**

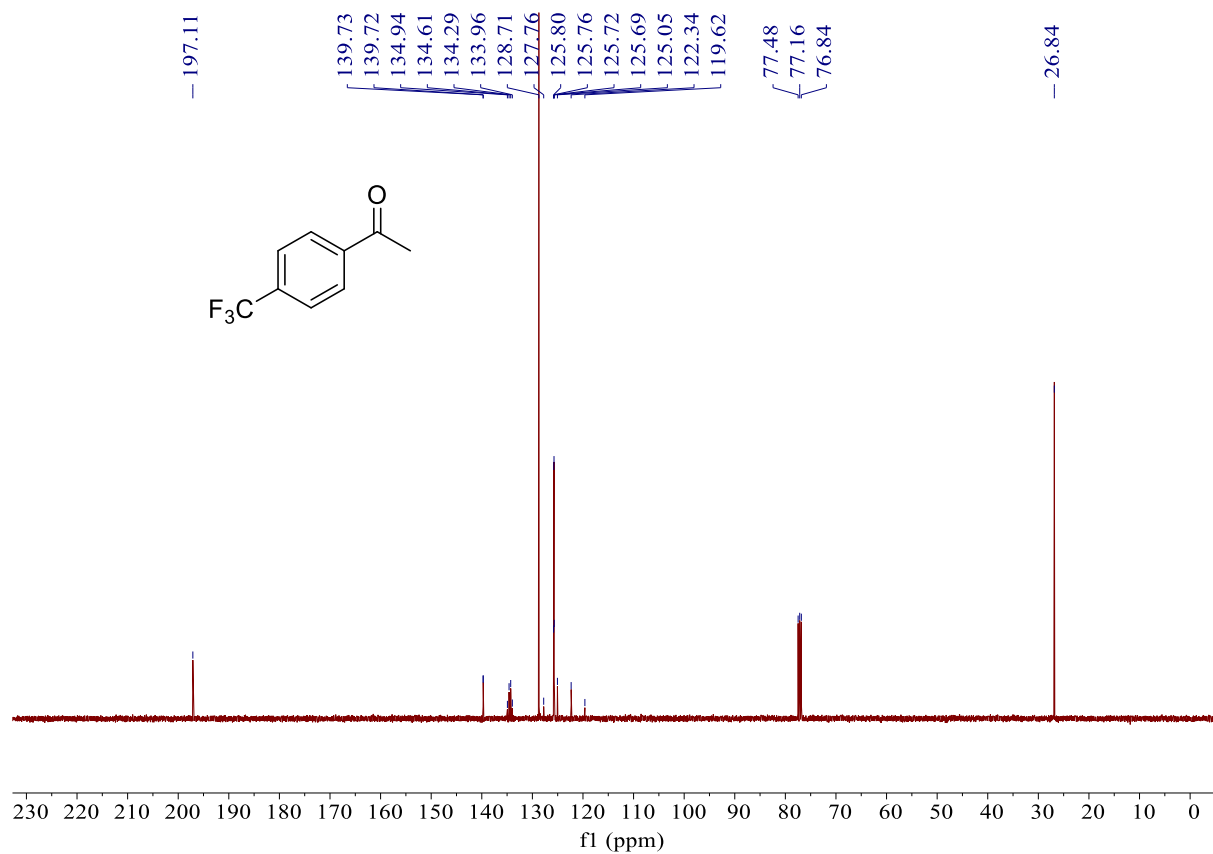

**<sup>1</sup>H NMR of compound 2x:**

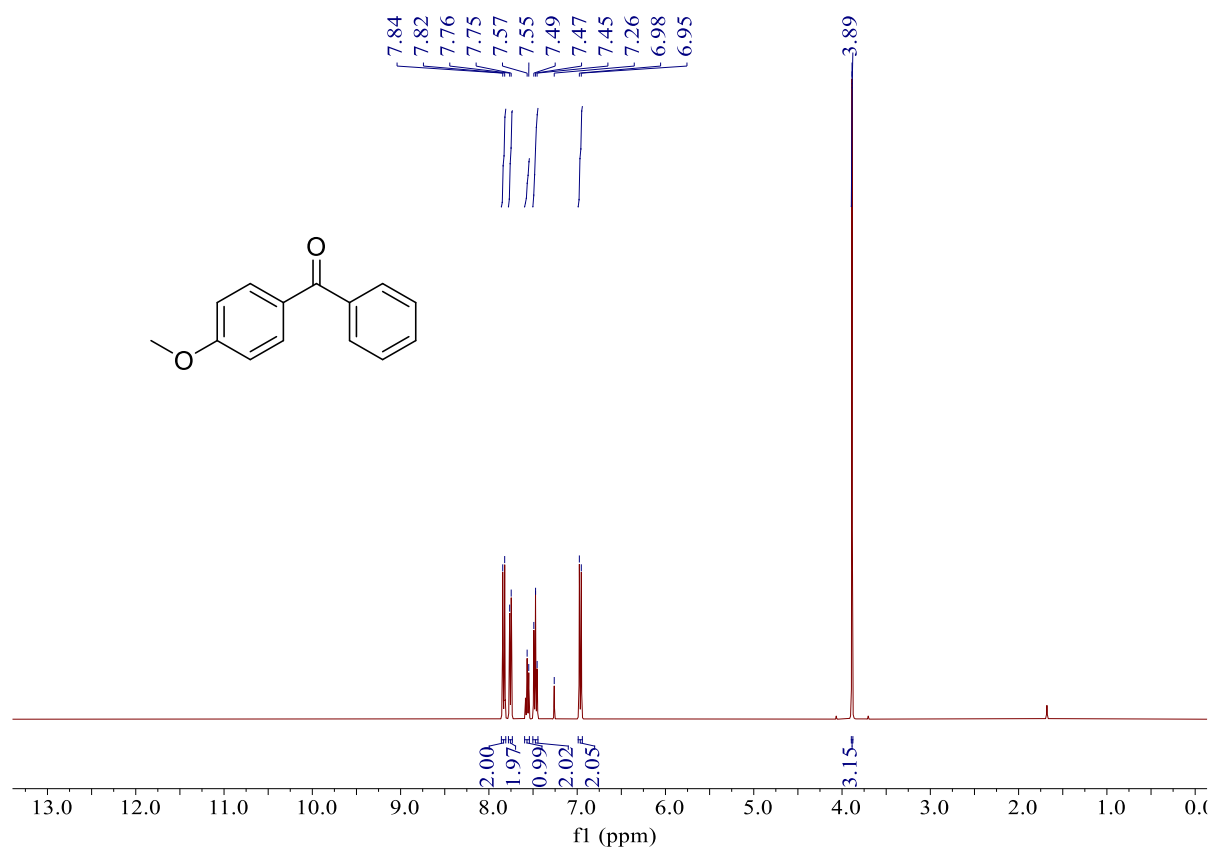

**<sup>13</sup>C NMR of compound 2x:**

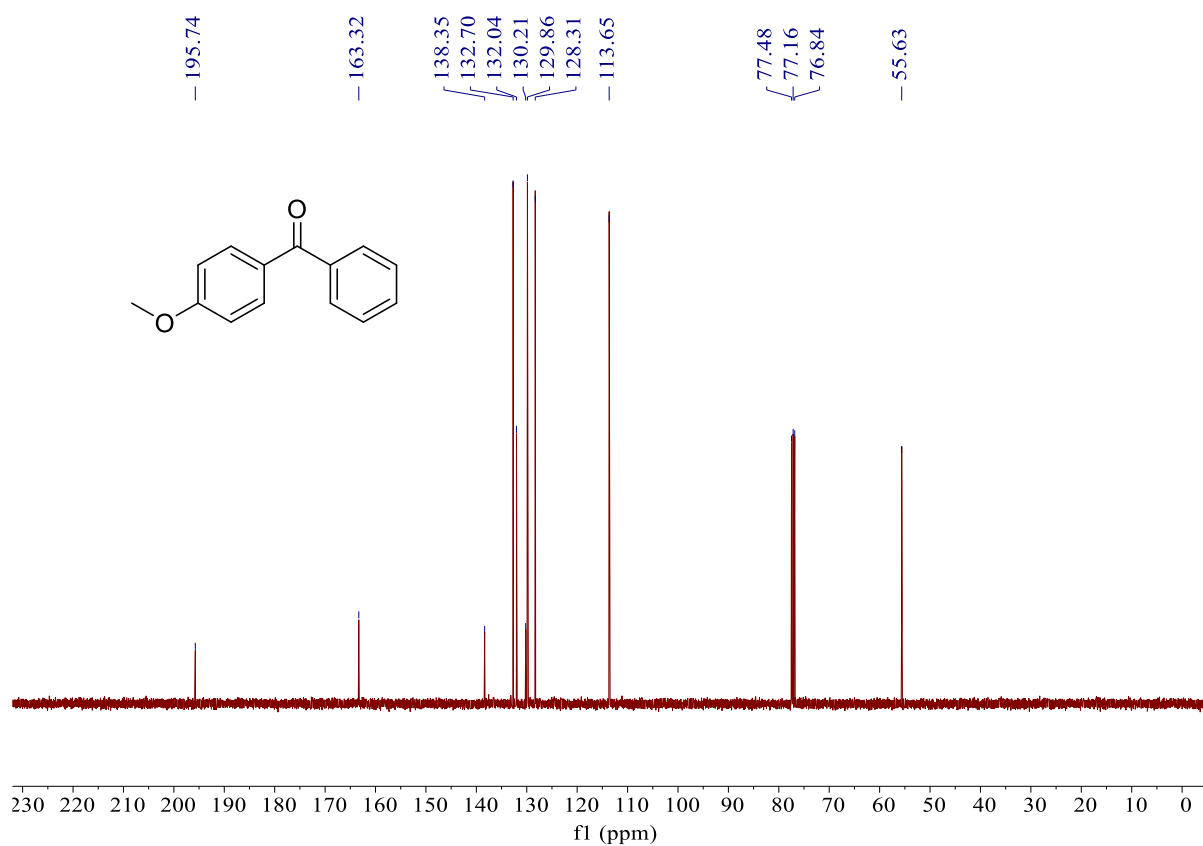

**<sup>1</sup>H NMR of compound 2y:**

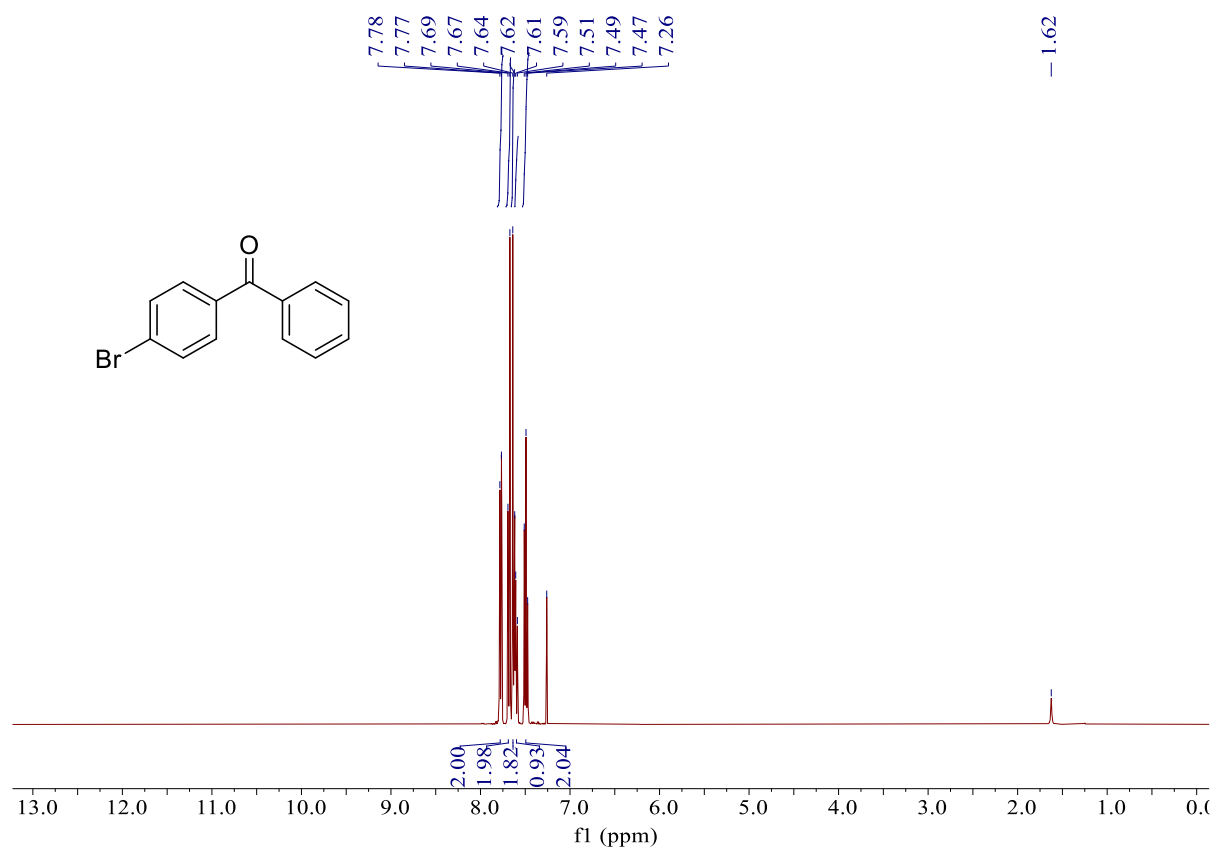

**<sup>13</sup>C NMR of compound 2y:**

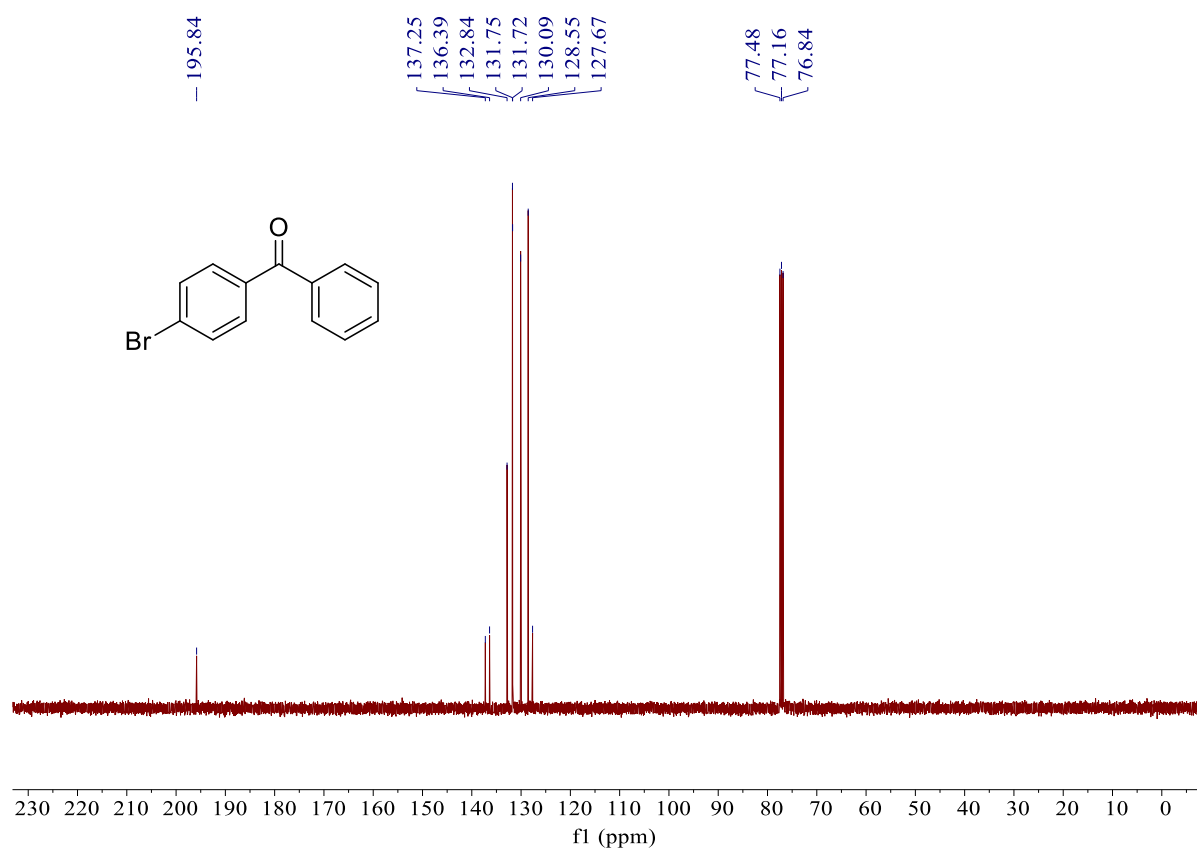



**<sup>1</sup>H NMR of compound 2z:**

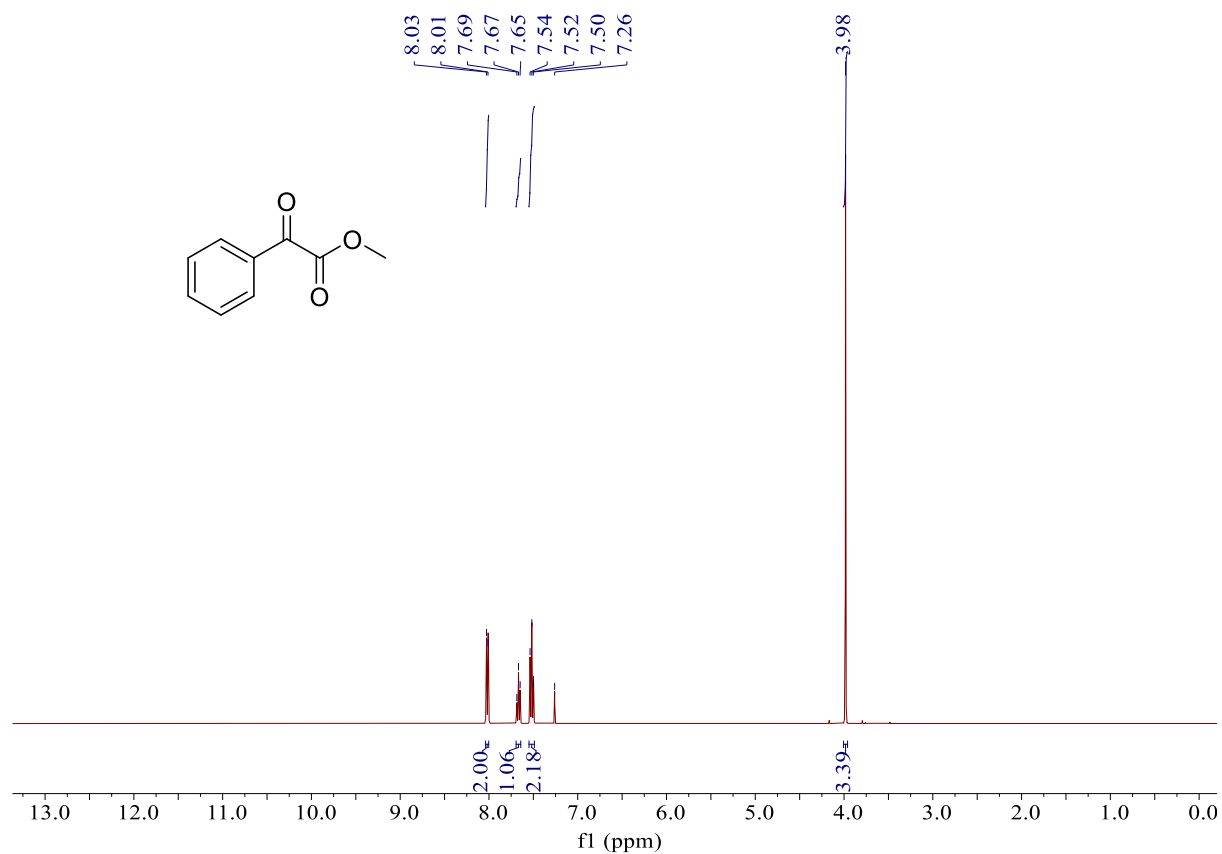

**<sup>13</sup>C NMR of compound 2z:**

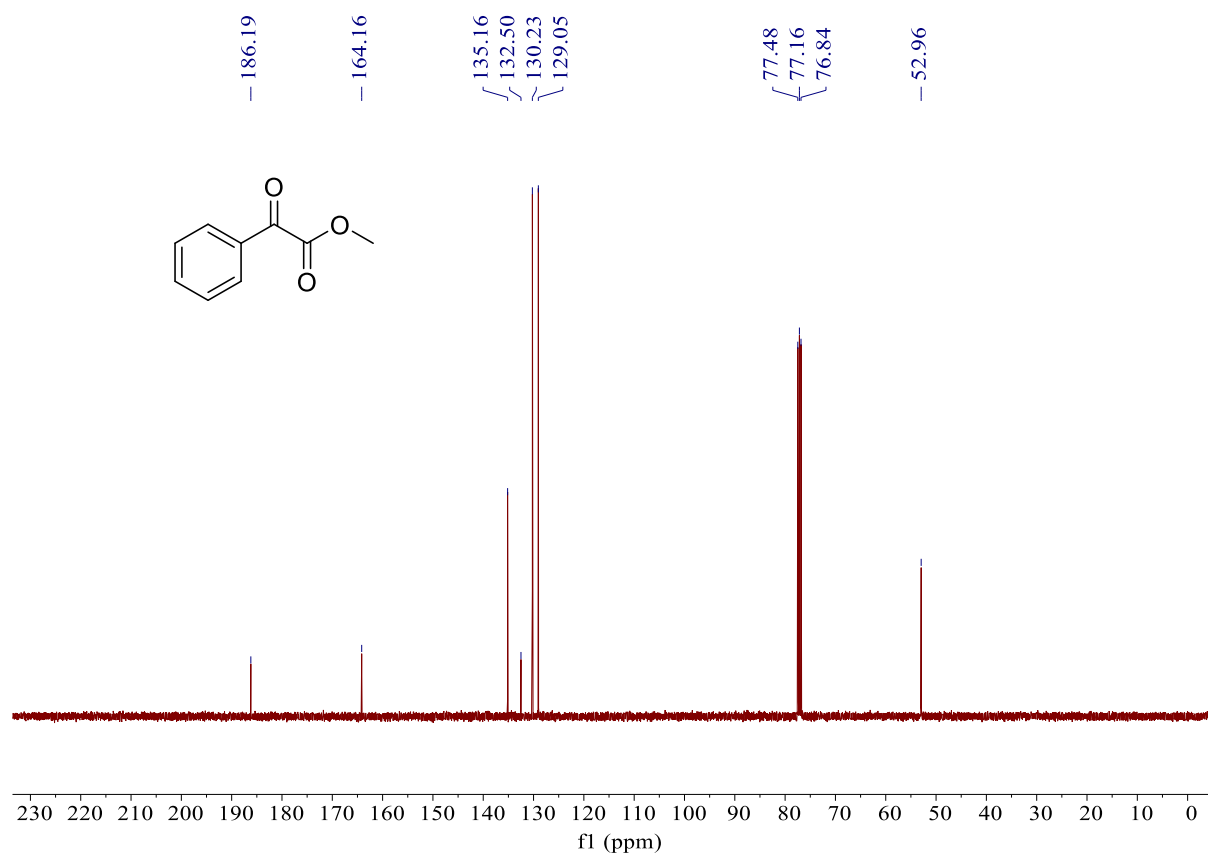

**<sup>1</sup>H NMR of compound 2aa:**

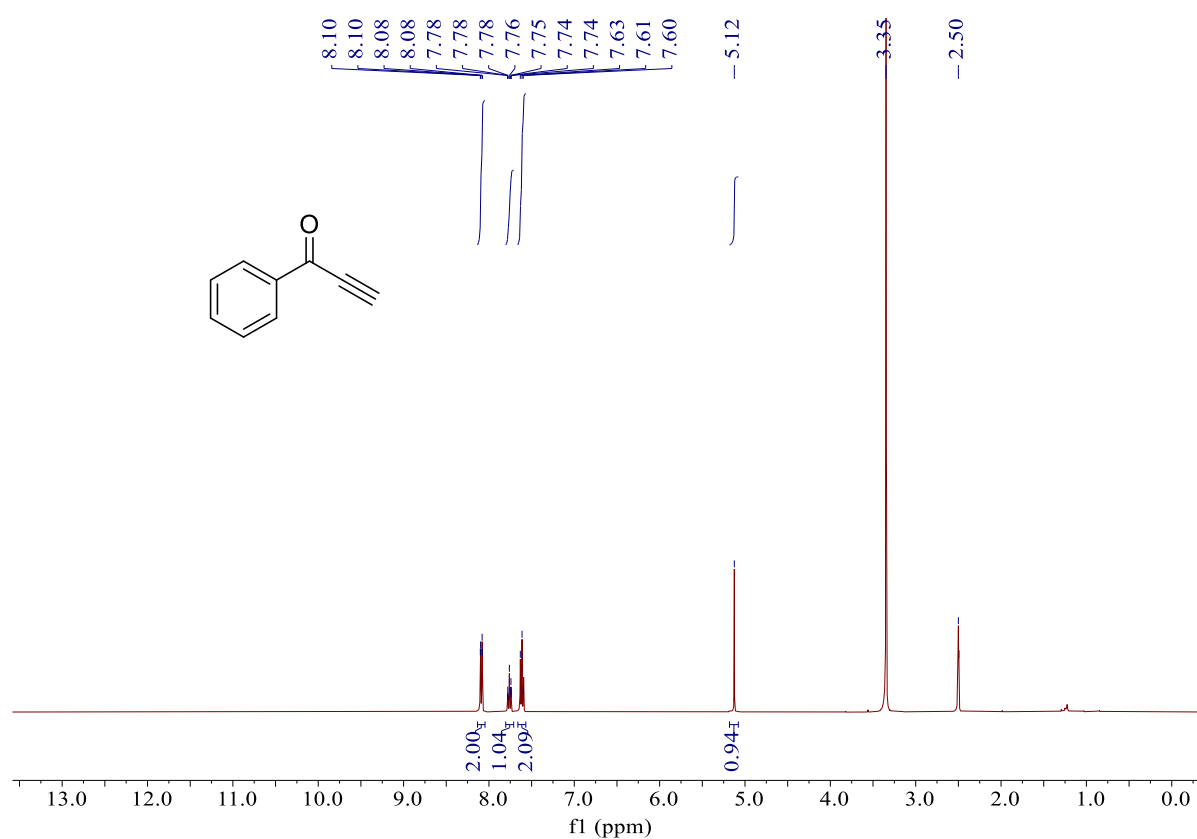

**<sup>13</sup>C NMR of compound 2aa:**

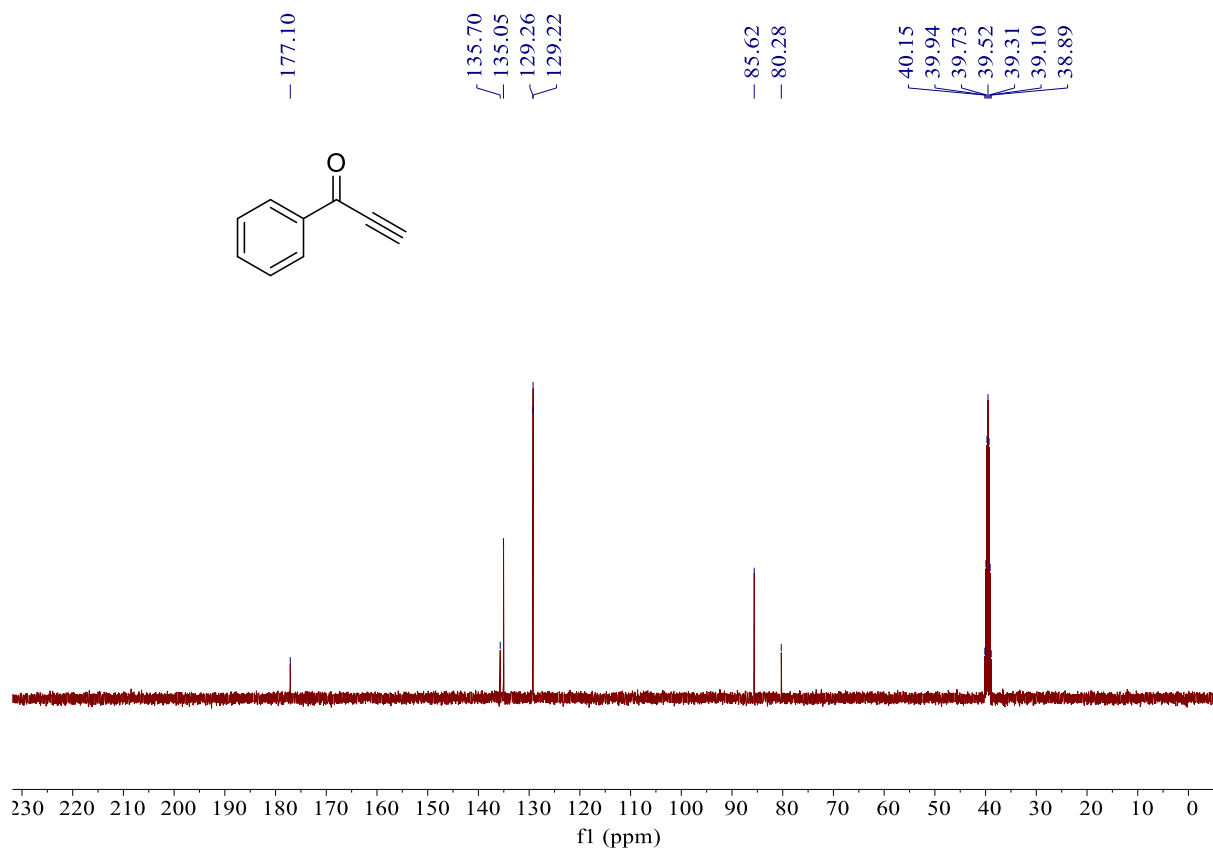

**<sup>1</sup>H NMR of compound 2ab:**

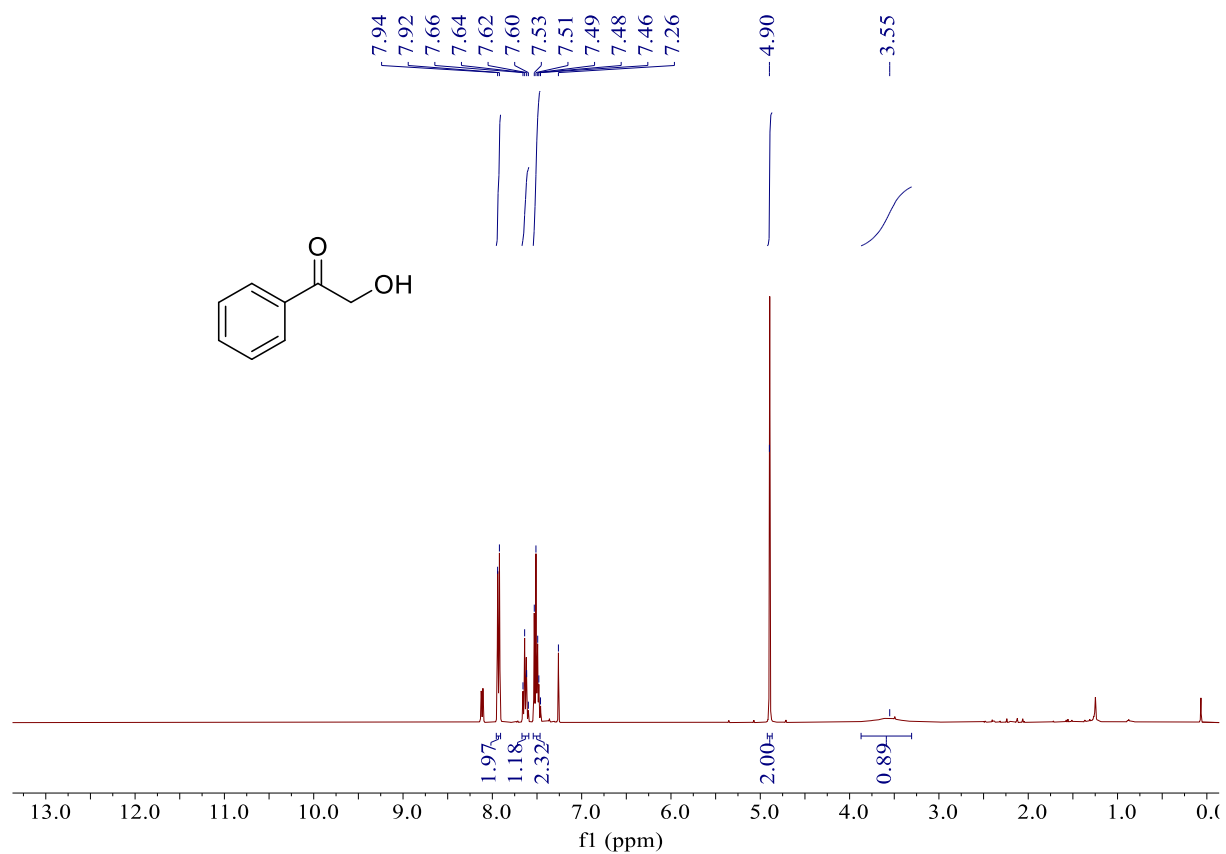

**<sup>13</sup>C NMR of compound 2ab:**

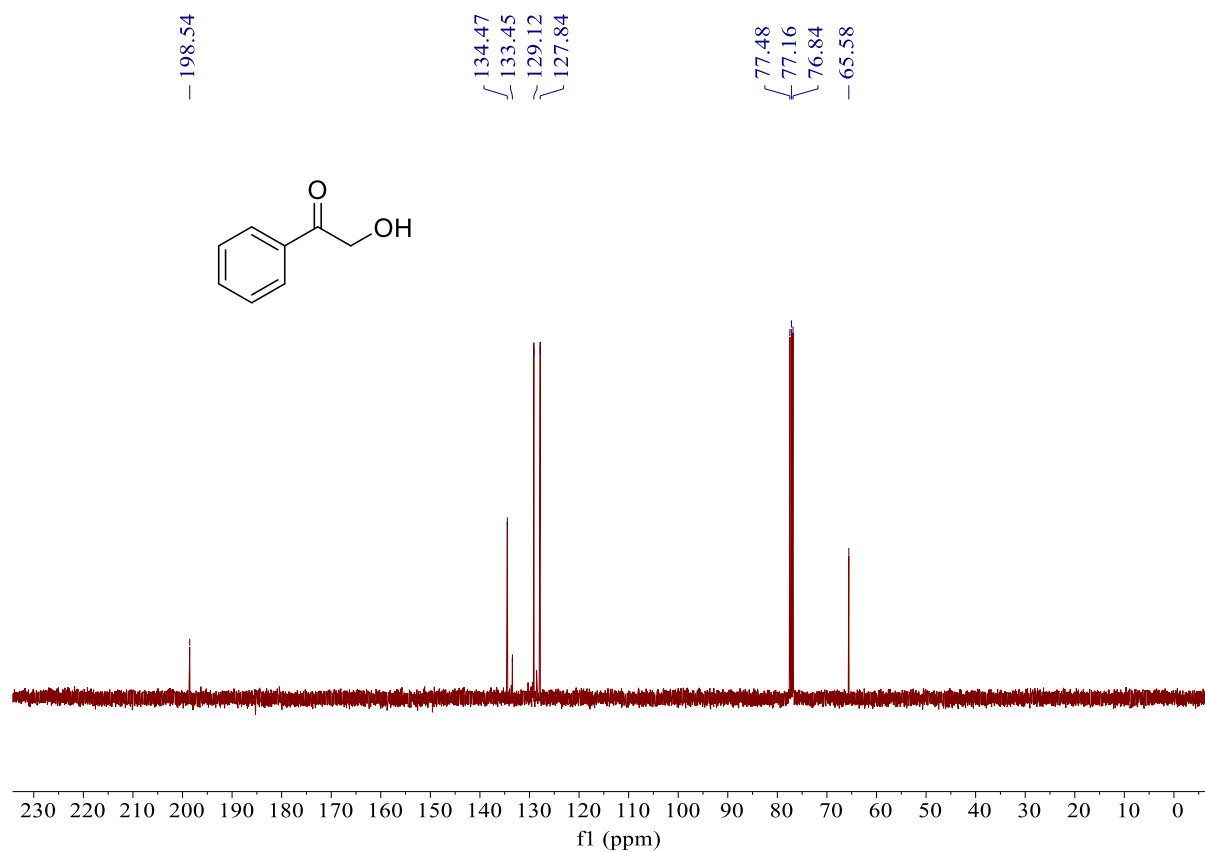

**<sup>1</sup>H NMR of compound 2ac:**

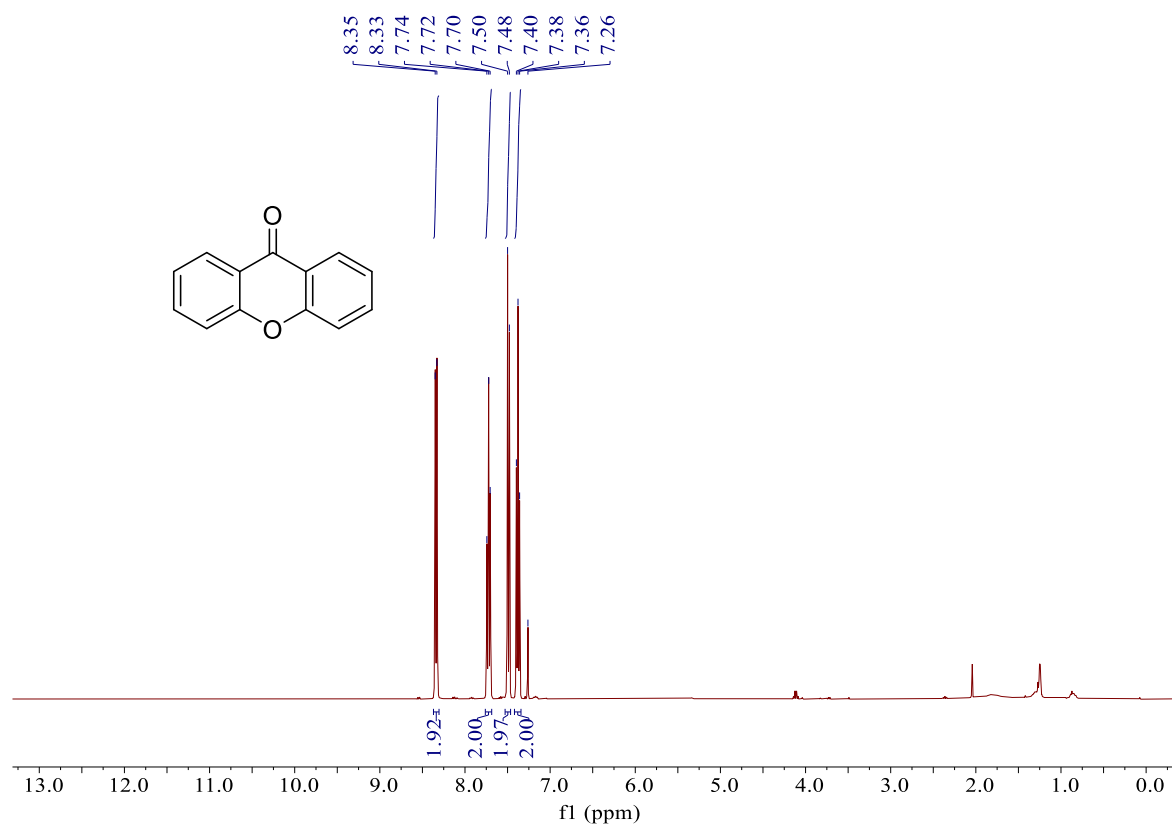

**<sup>13</sup>C NMR of compound 2ac:**

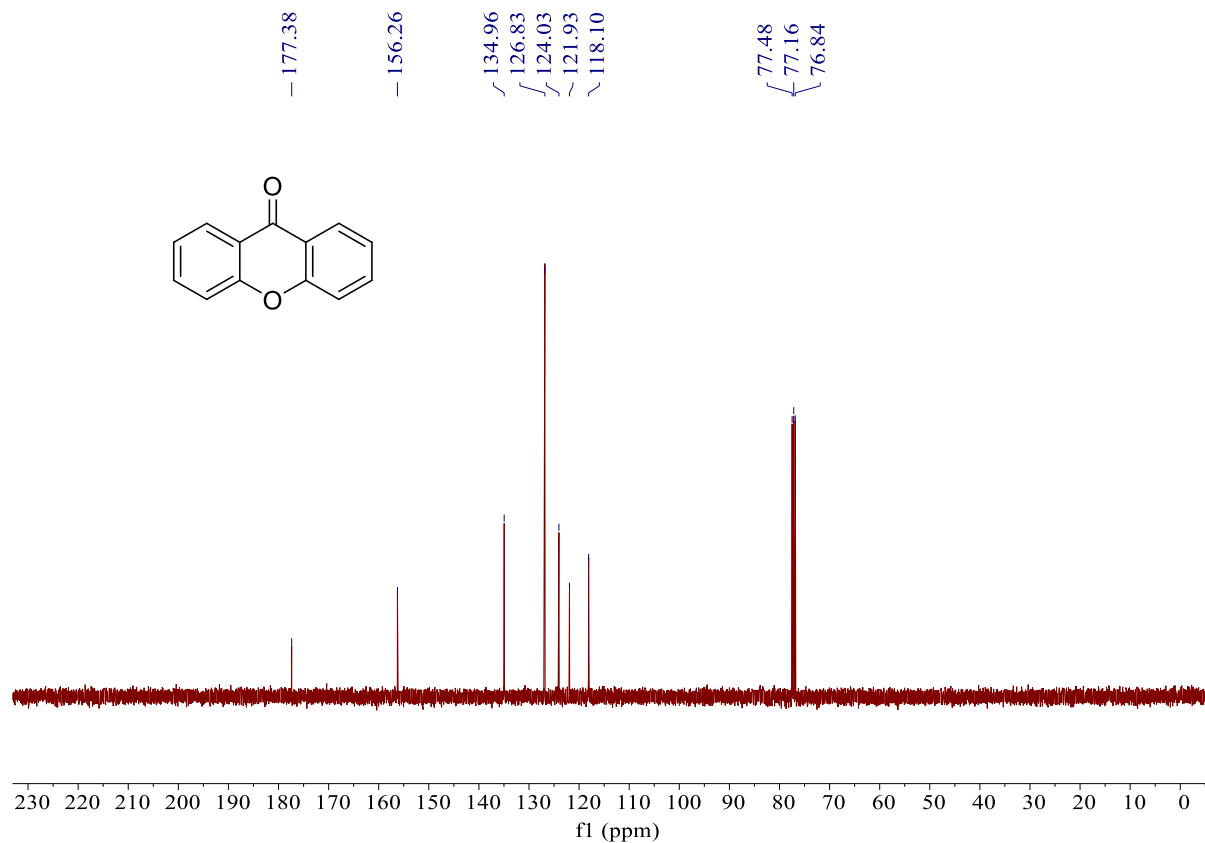

**<sup>1</sup>H NMR of compound 2ad:**

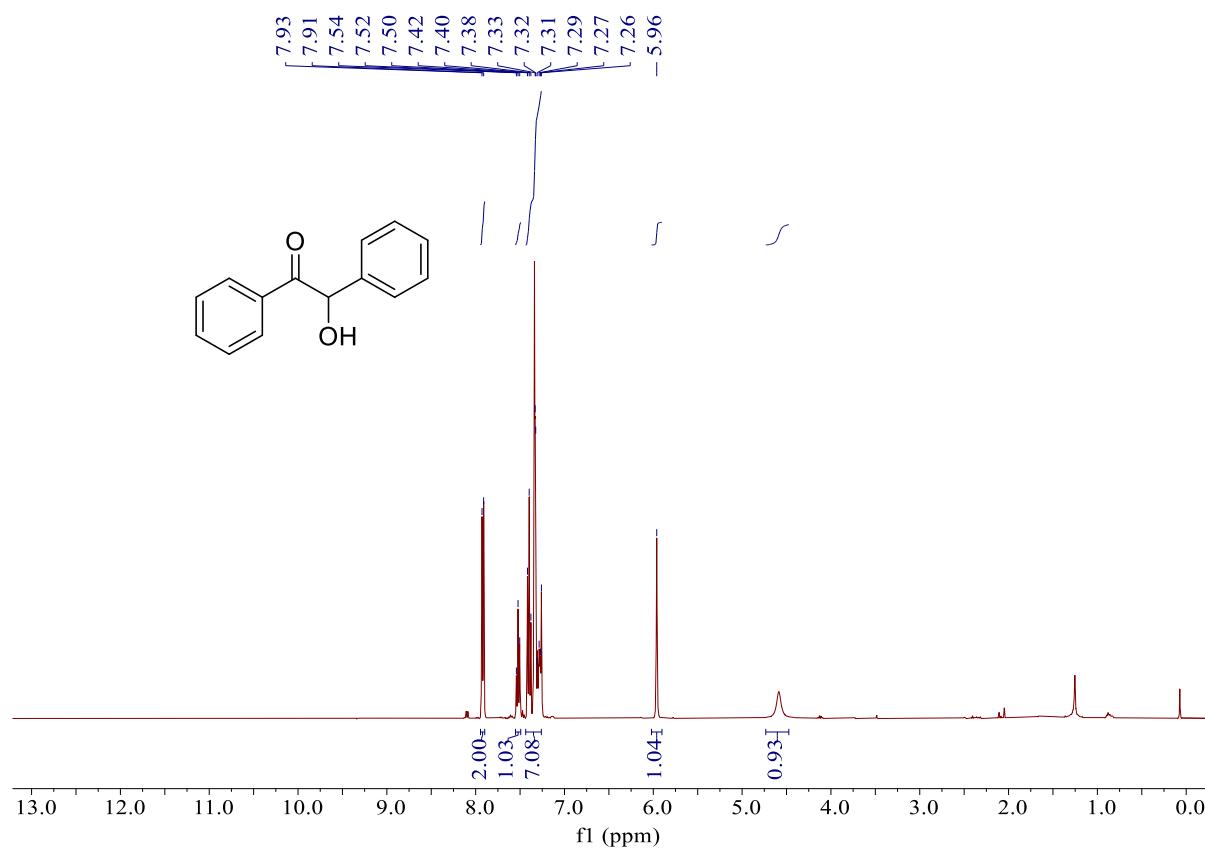

**<sup>13</sup>C NMR of compound 2ad:**

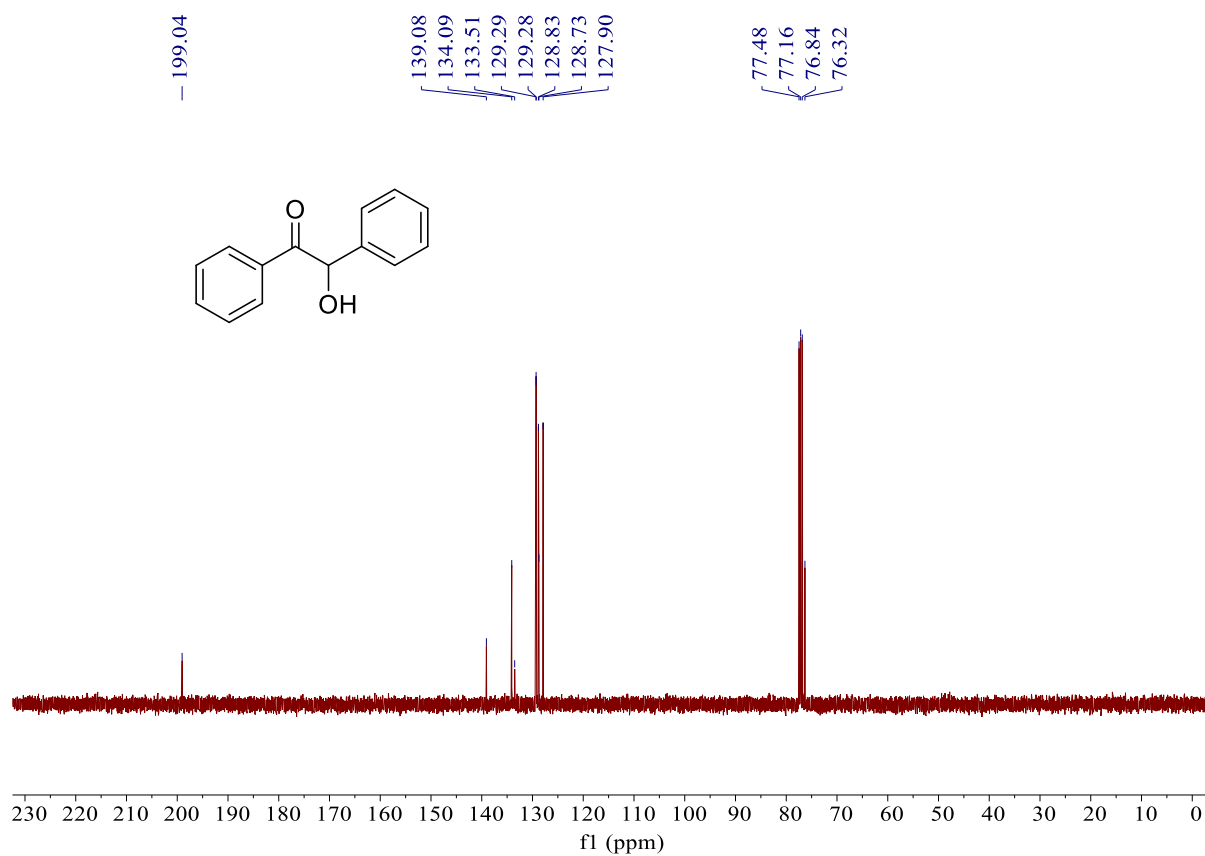

**<sup>1</sup>H NMR of compound 4a:**

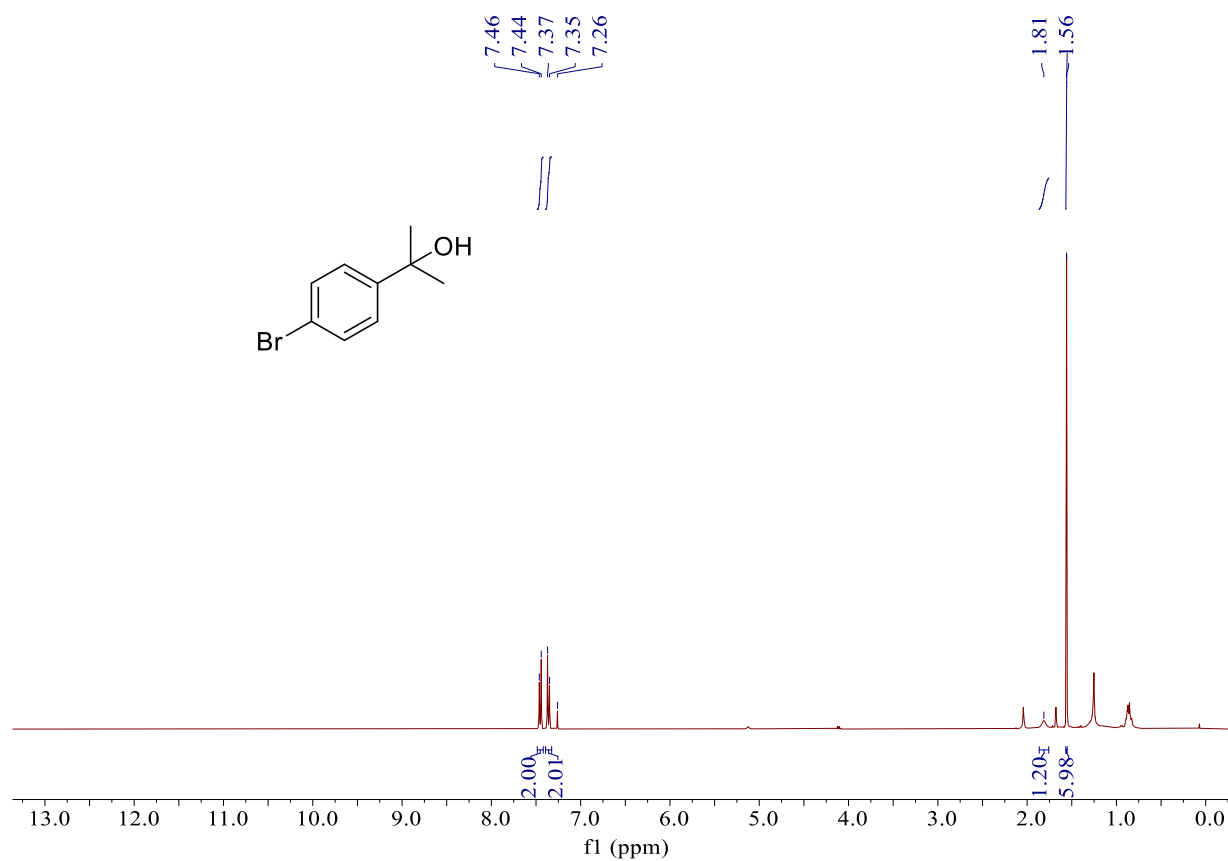

**<sup>13</sup>C NMR of compound 4a:**

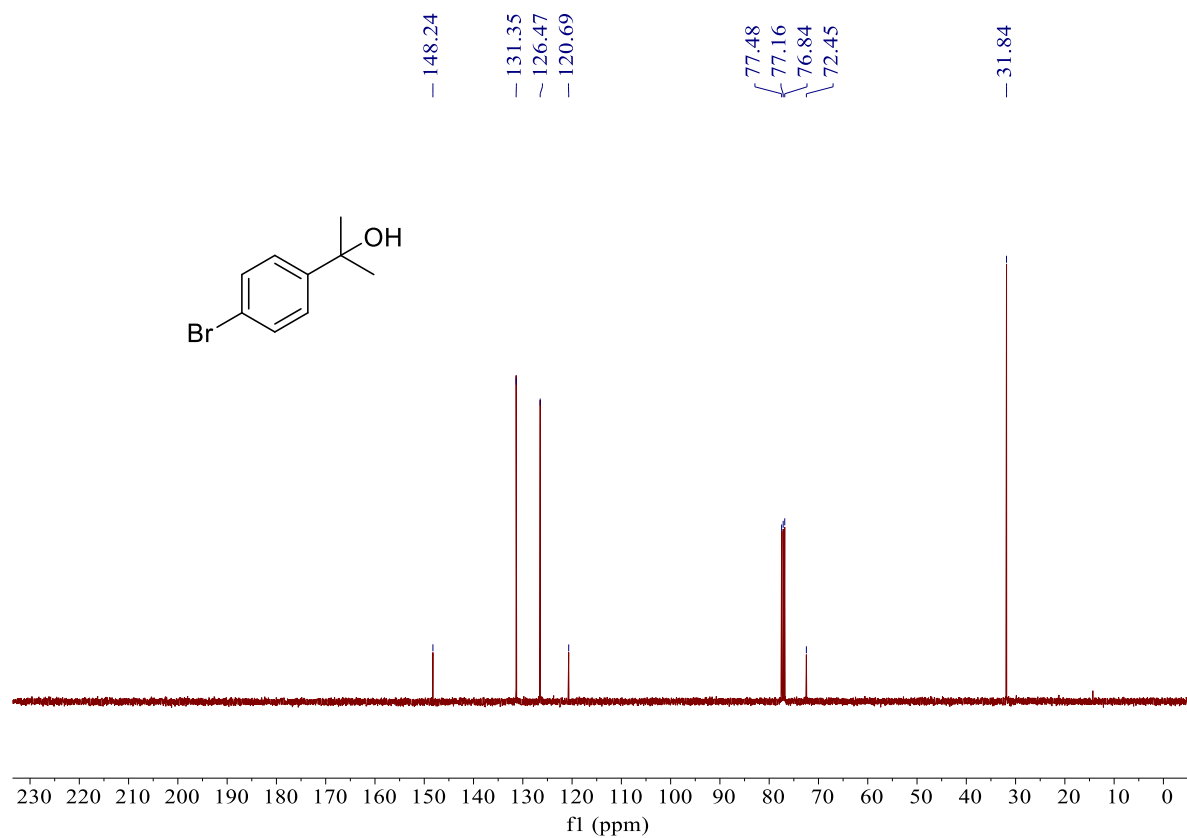

**<sup>1</sup>H NMR of compound 4b:**

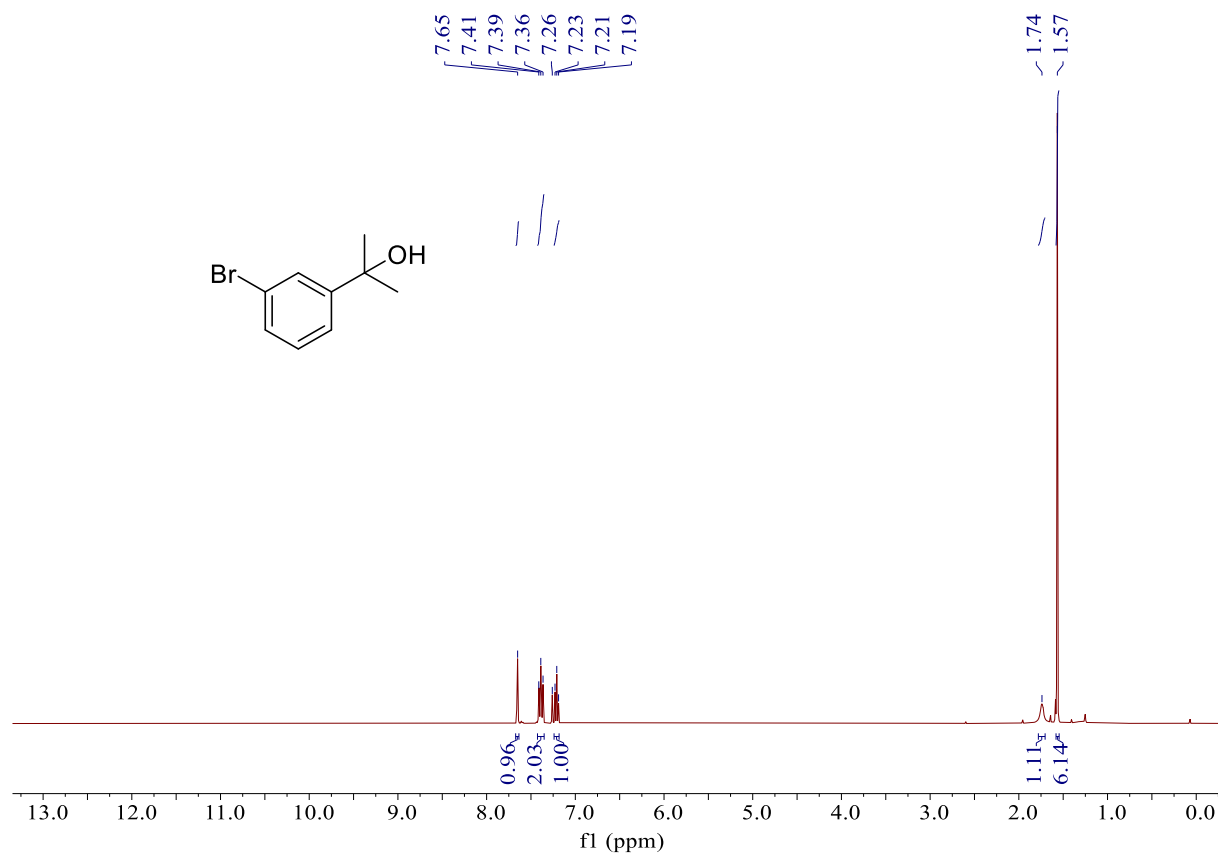

**<sup>13</sup>C NMR of compound 4b:**

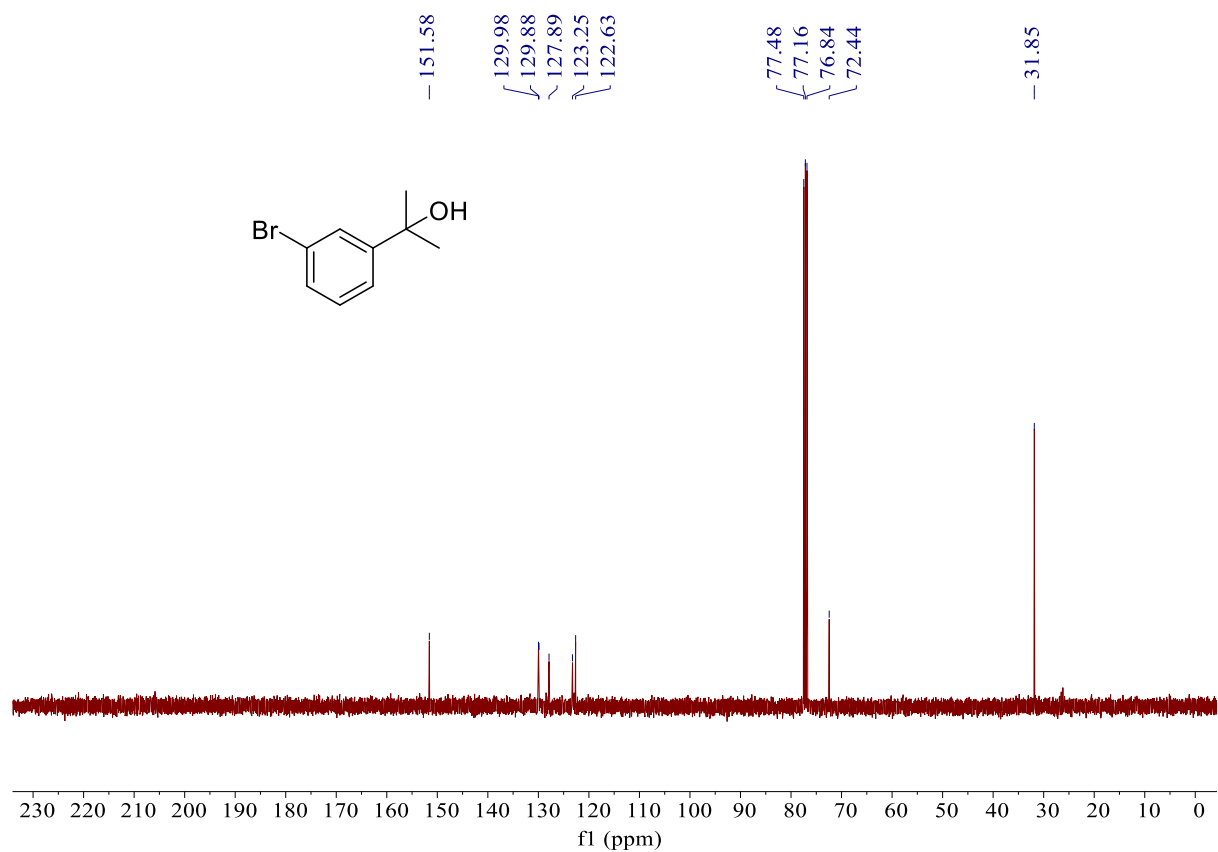

**<sup>1</sup>H NMR of compound 4c:**

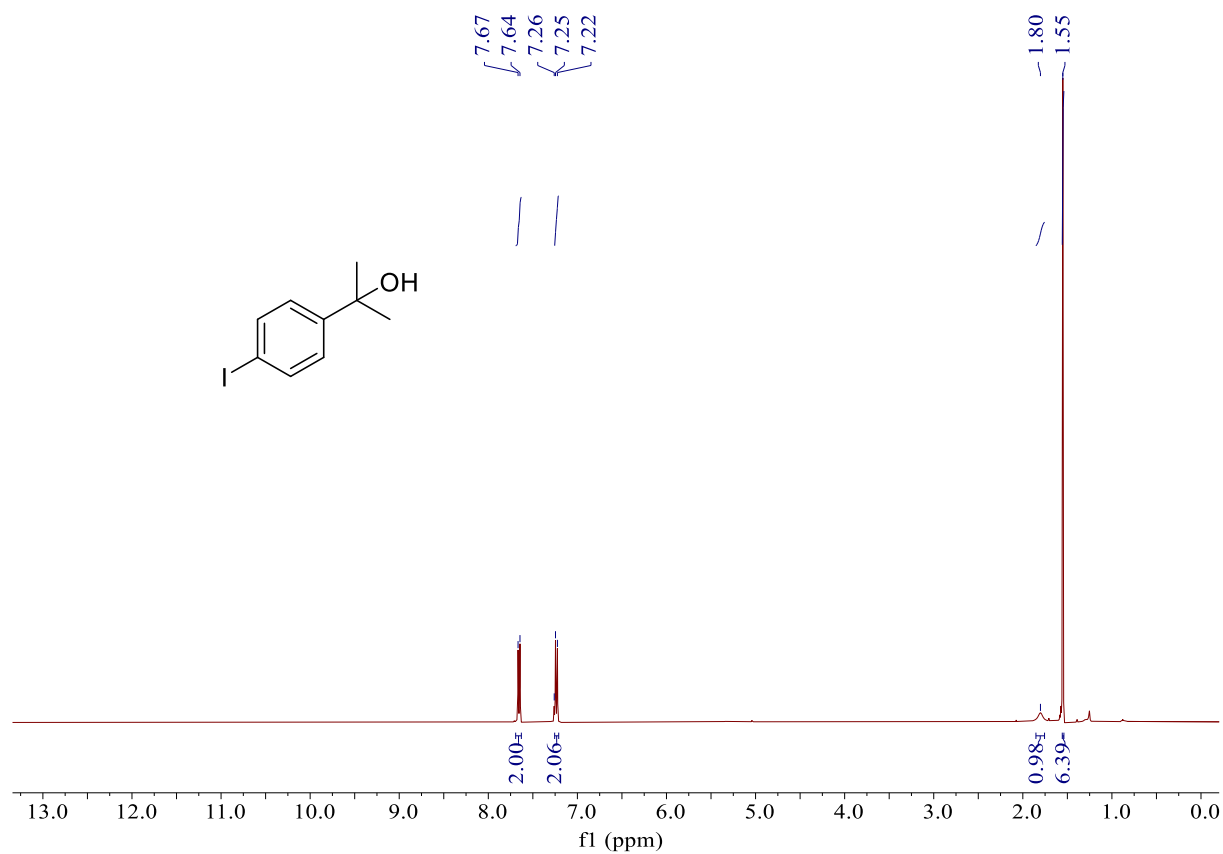

**<sup>13</sup>C NMR of compound 4c:**

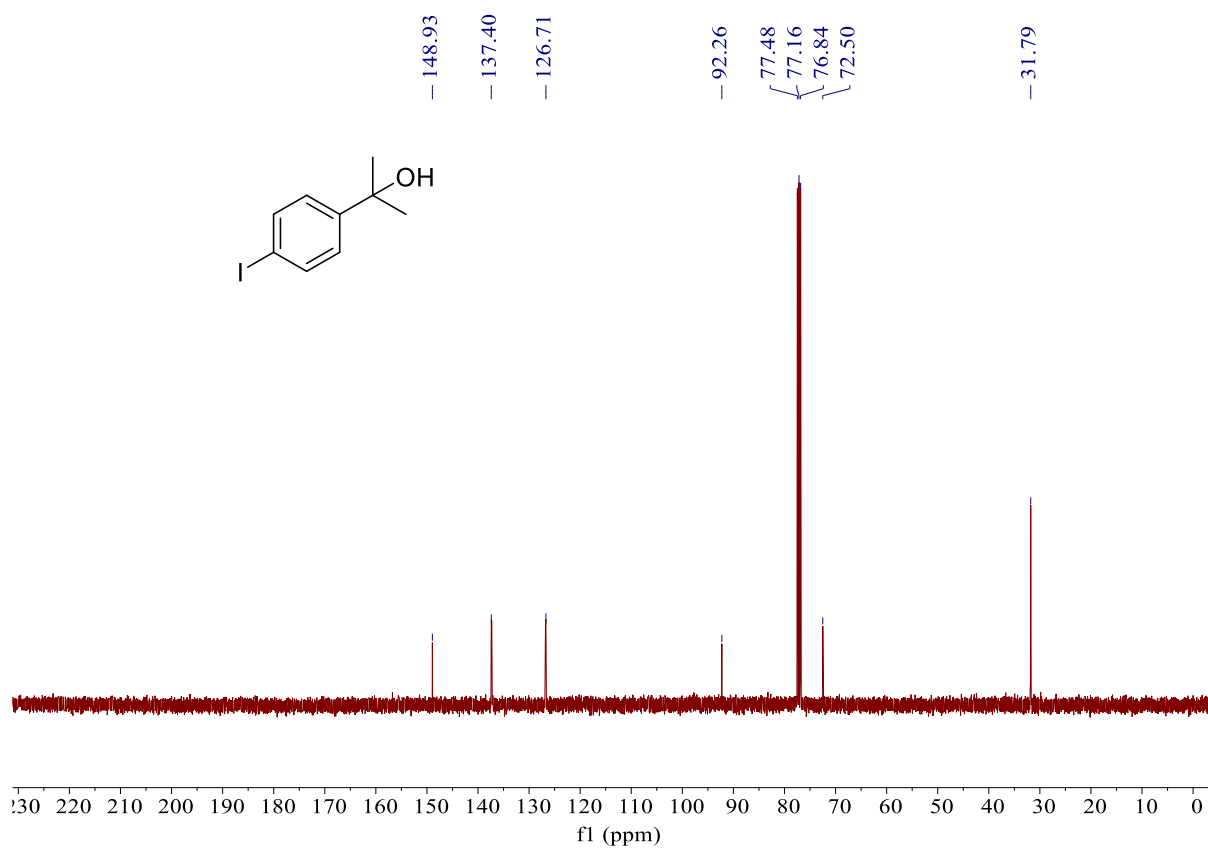



**<sup>1</sup>H NMR of compound 4d:**

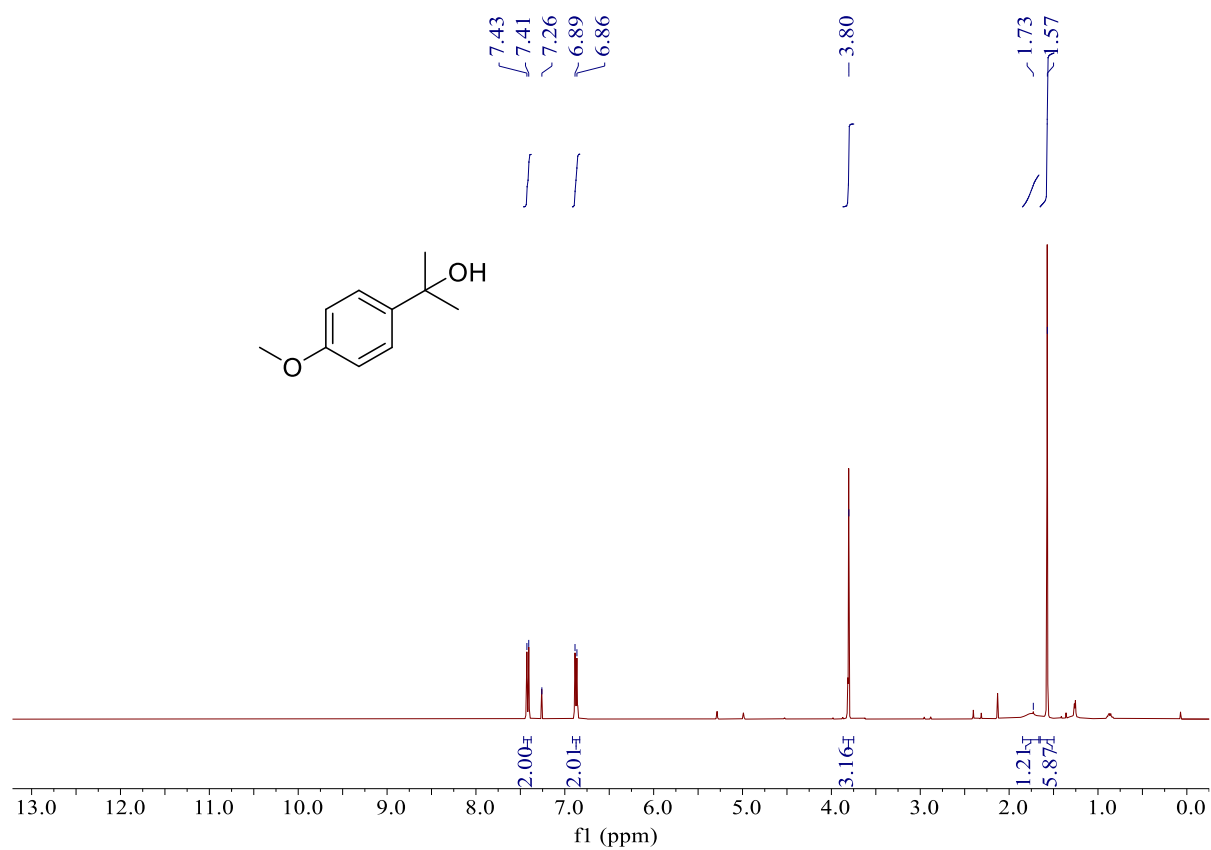

**<sup>13</sup>C NMR of compound 4d:**

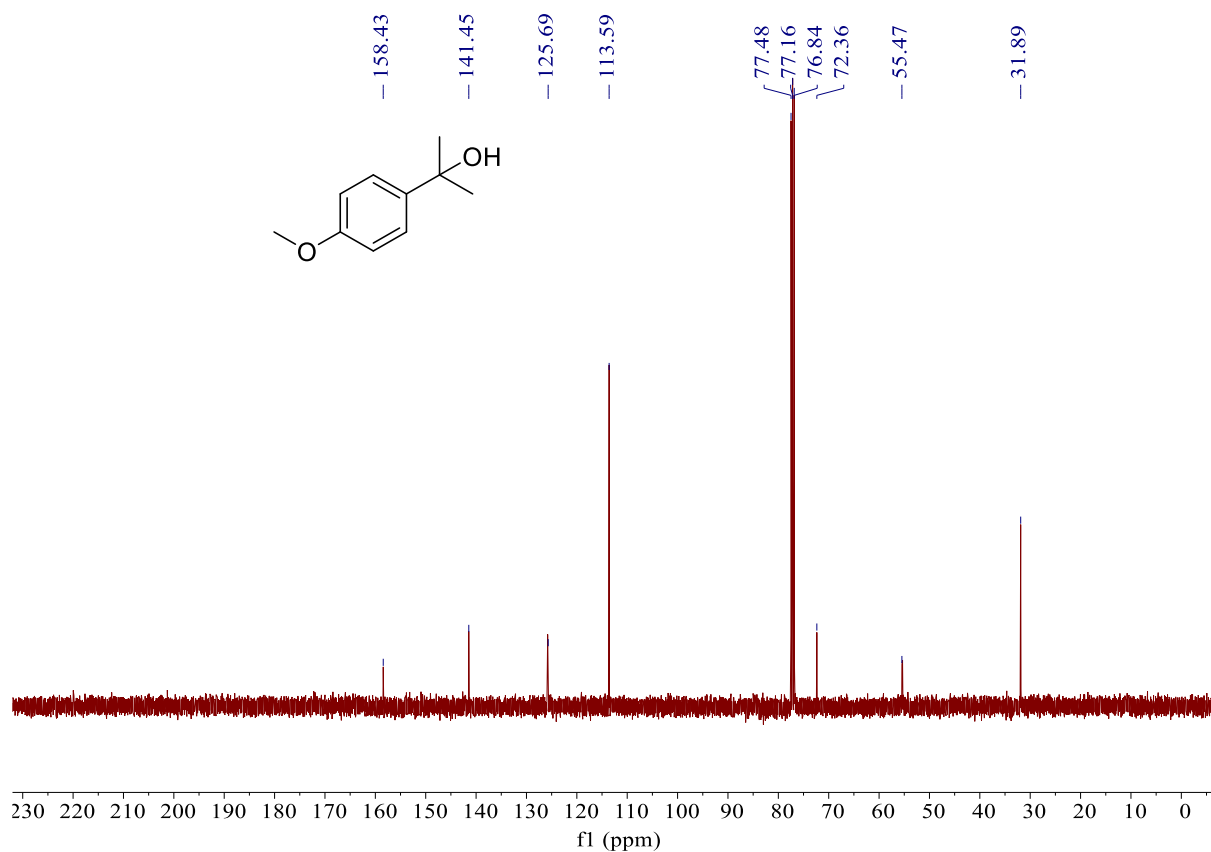

**<sup>1</sup>H NMR of compound 4e:**

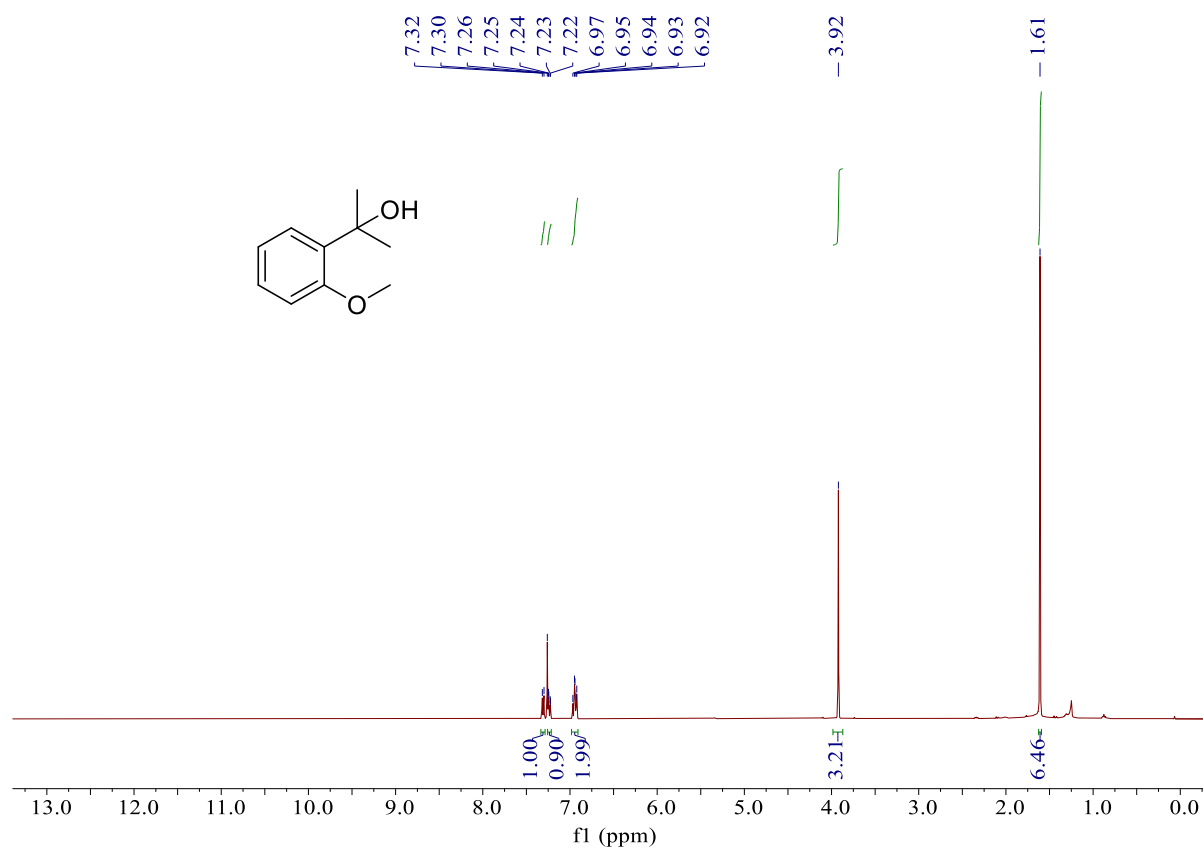

**<sup>13</sup>C NMR of compound 4e:**

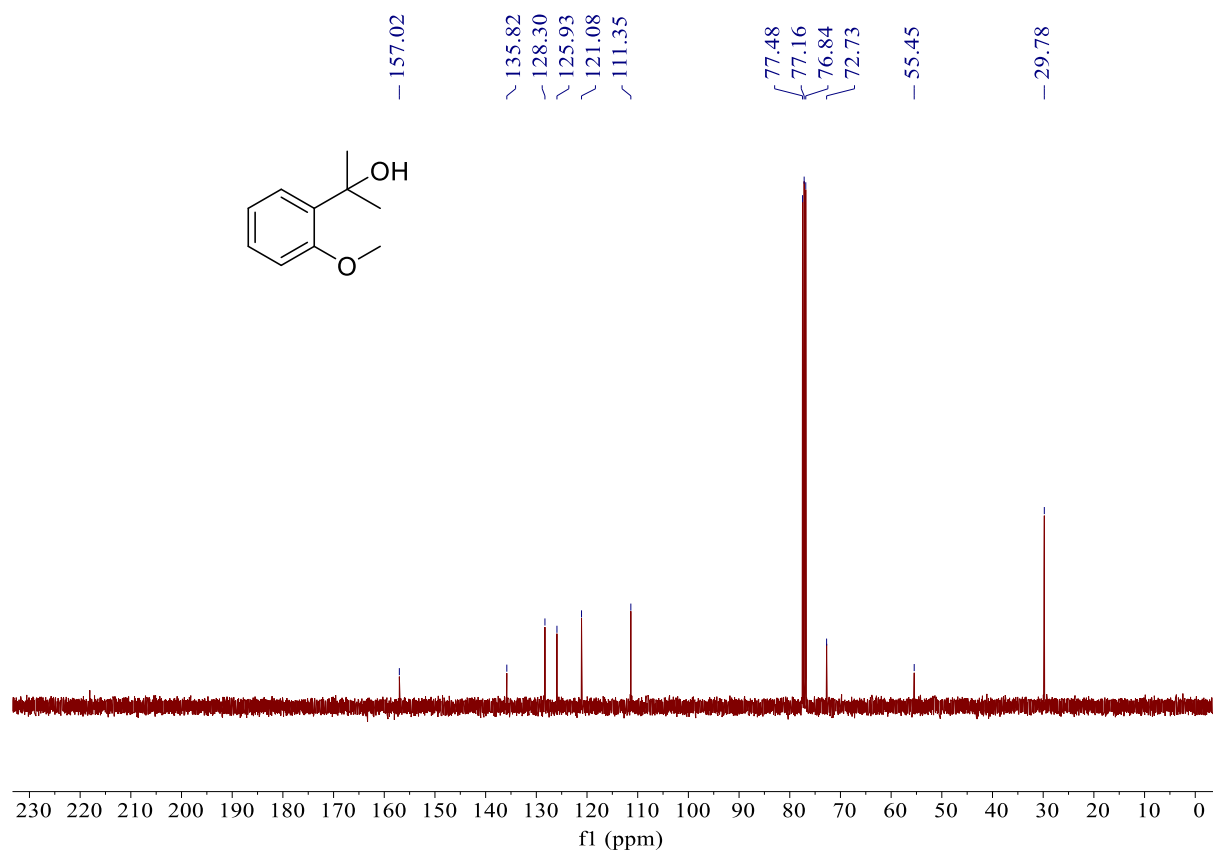

**<sup>1</sup>H NMR of compound 4f:**

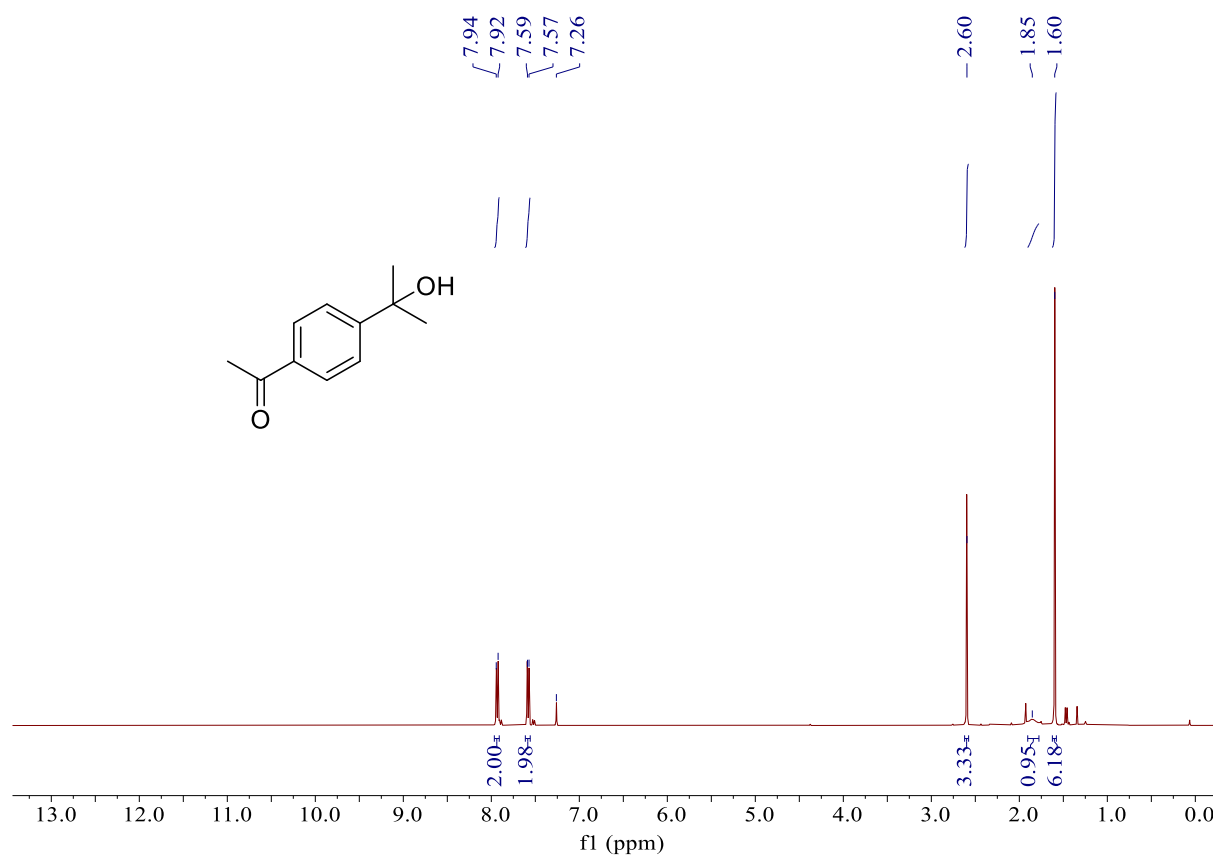

**<sup>13</sup>C NMR of compound 4f:**

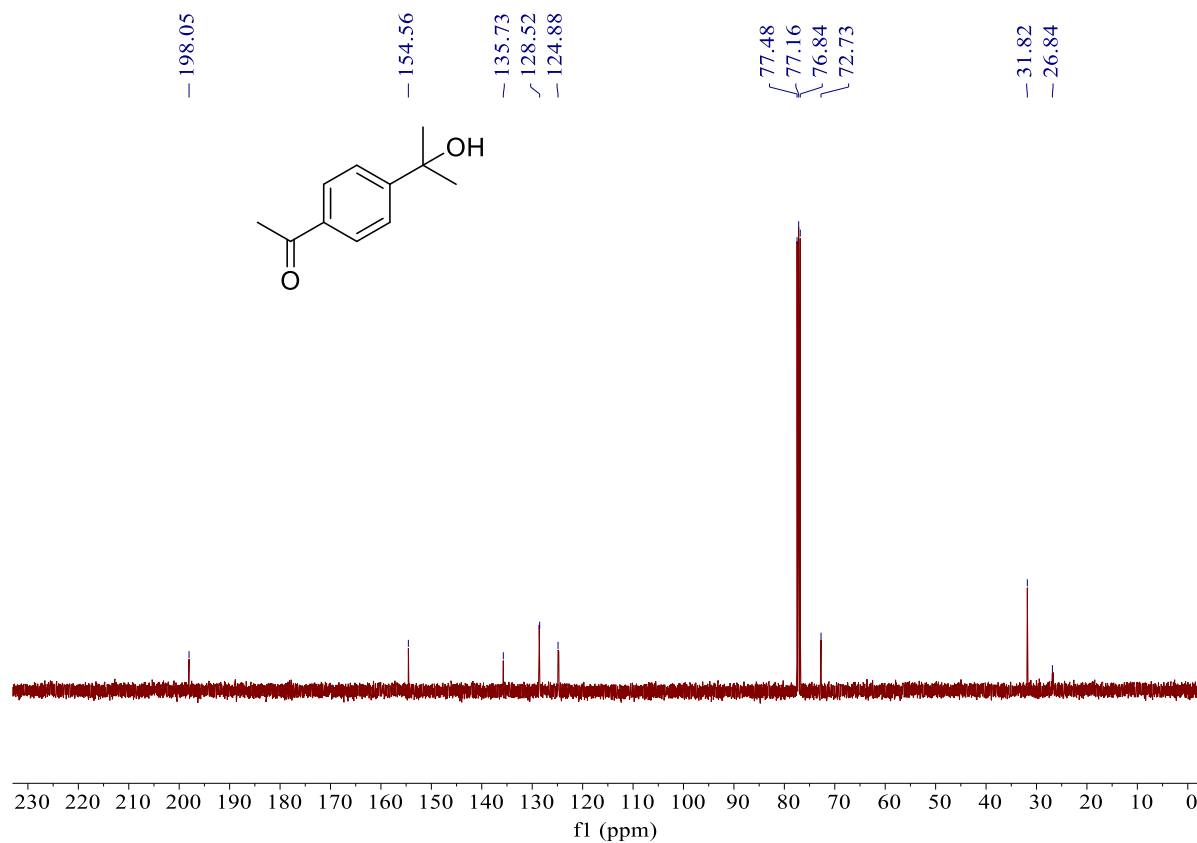

**<sup>1</sup>H NMR of compound 4g:**

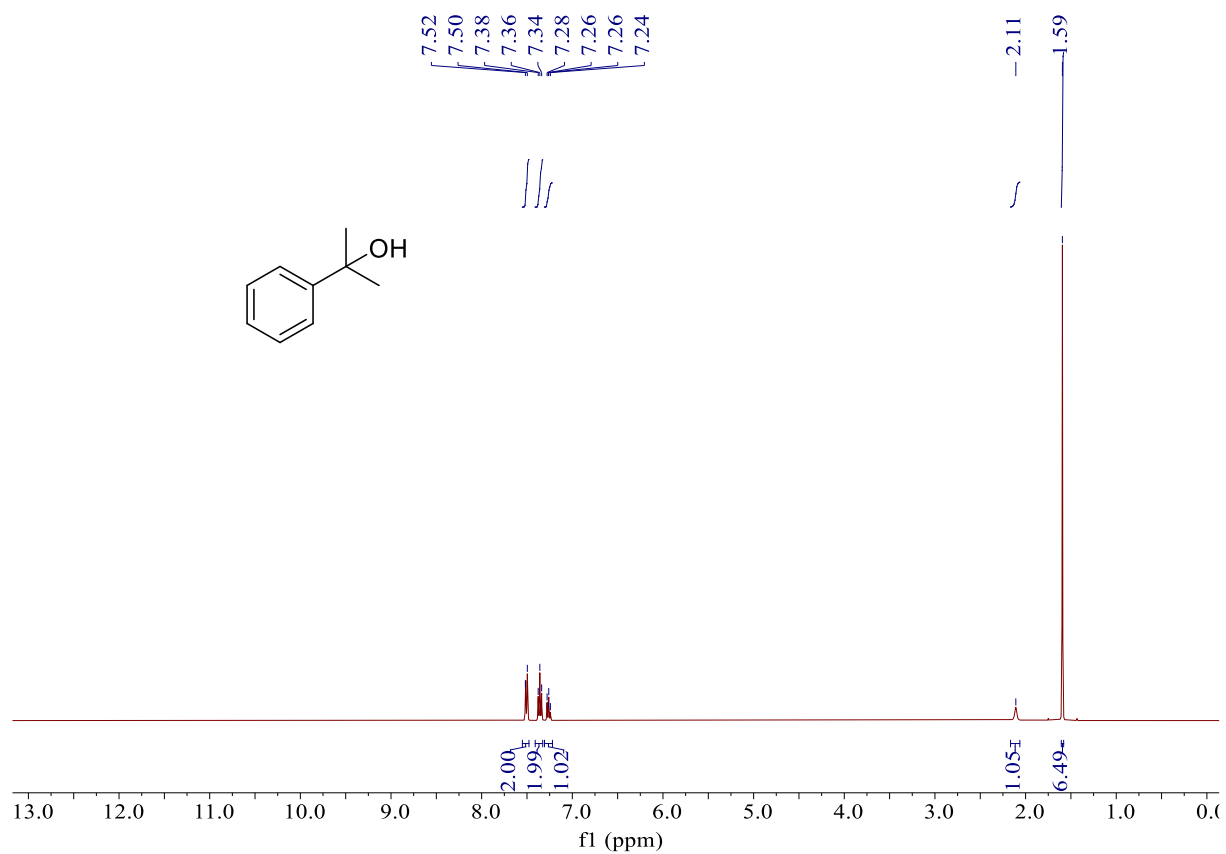

**<sup>13</sup>C NMR of compound 4g:**

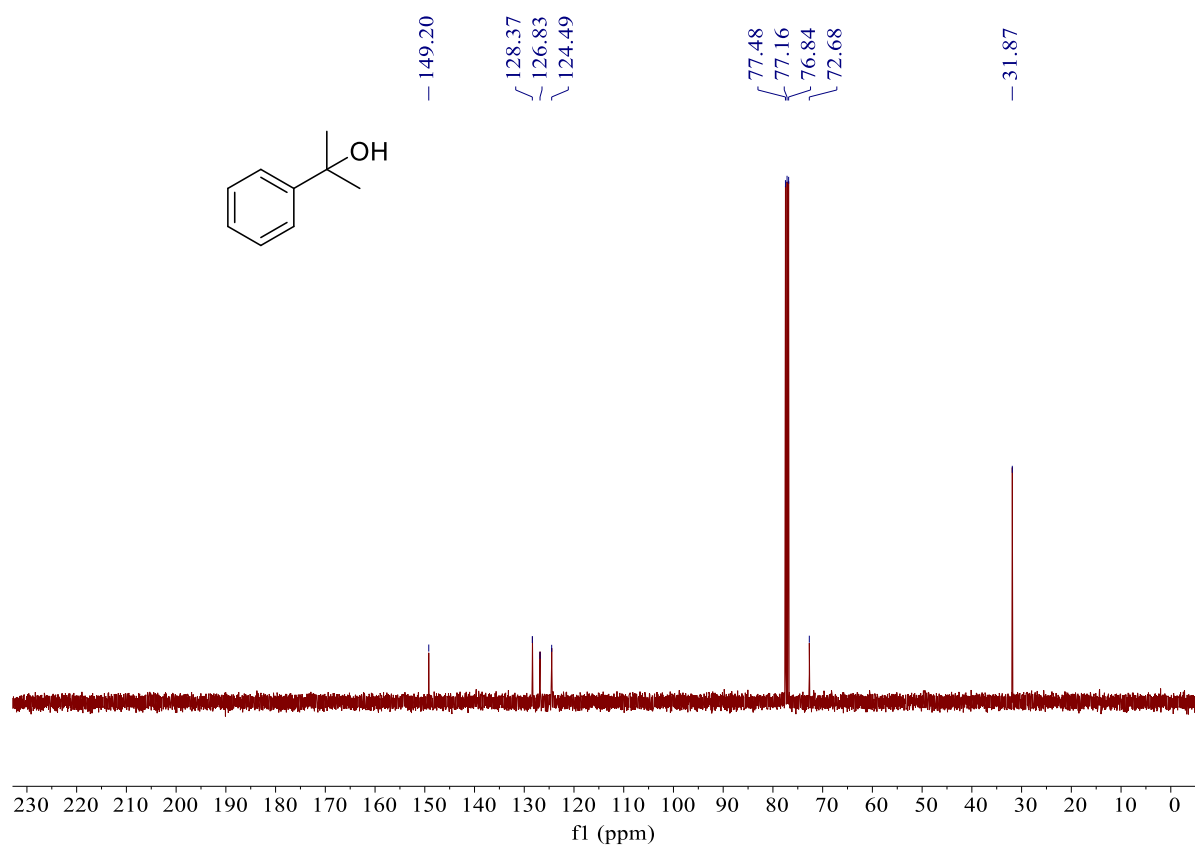

**<sup>1</sup>H NMR of compound 6a:**

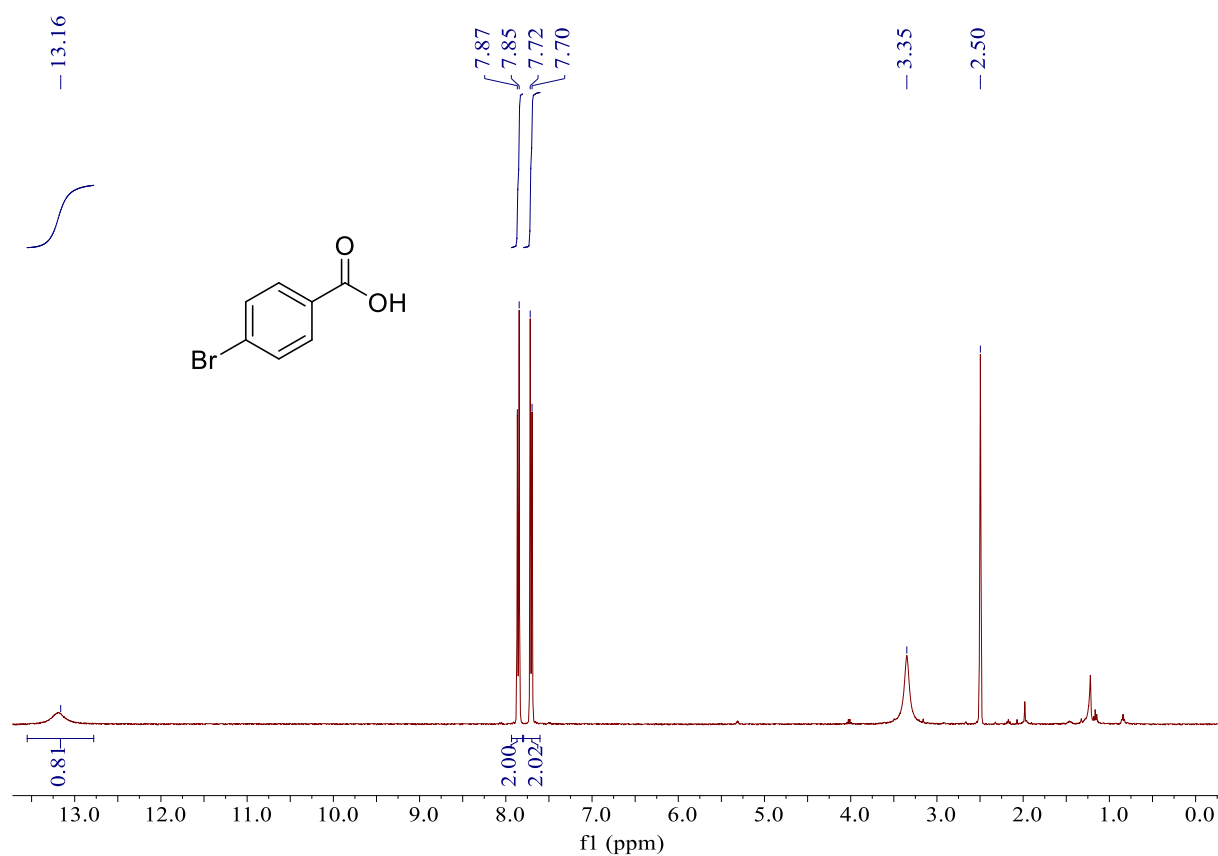

**<sup>13</sup>C NMR of compound 6a:**

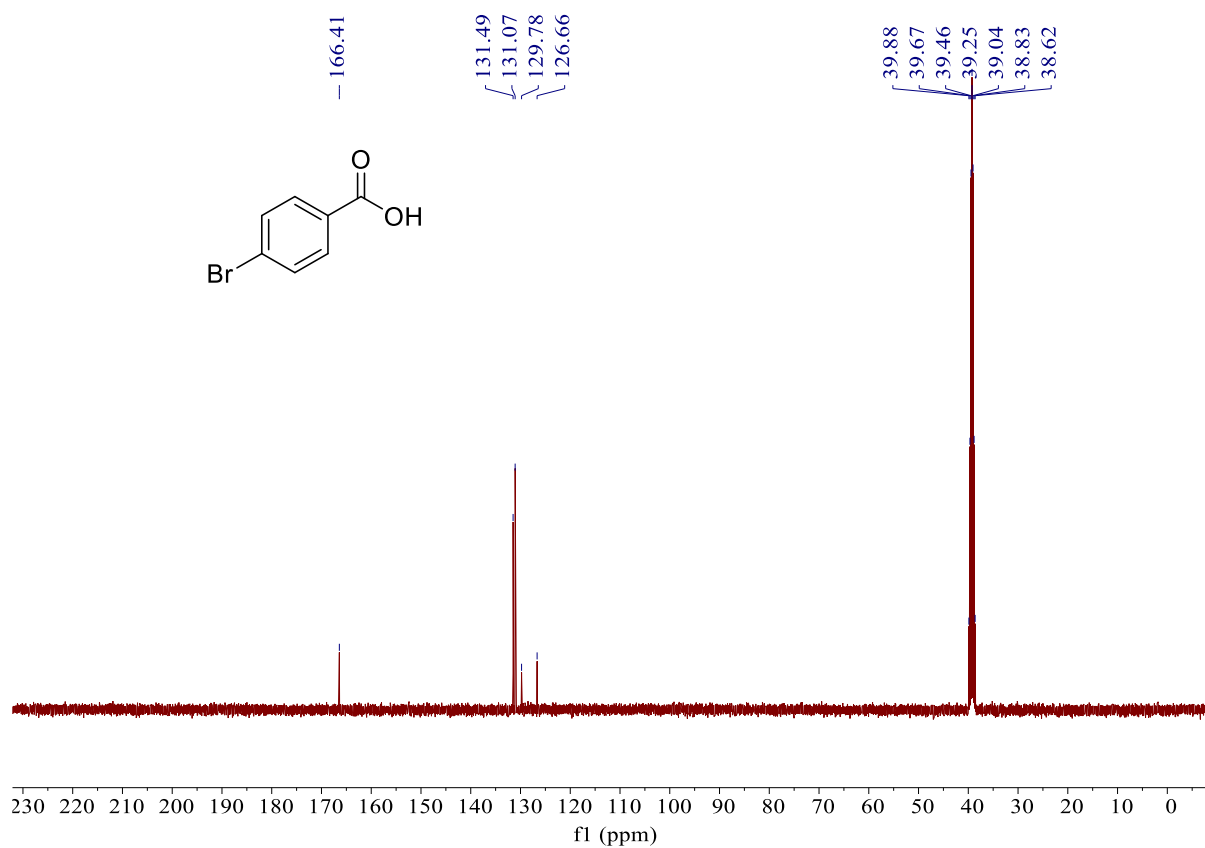

**<sup>1</sup>H NMR of compound 6b:**

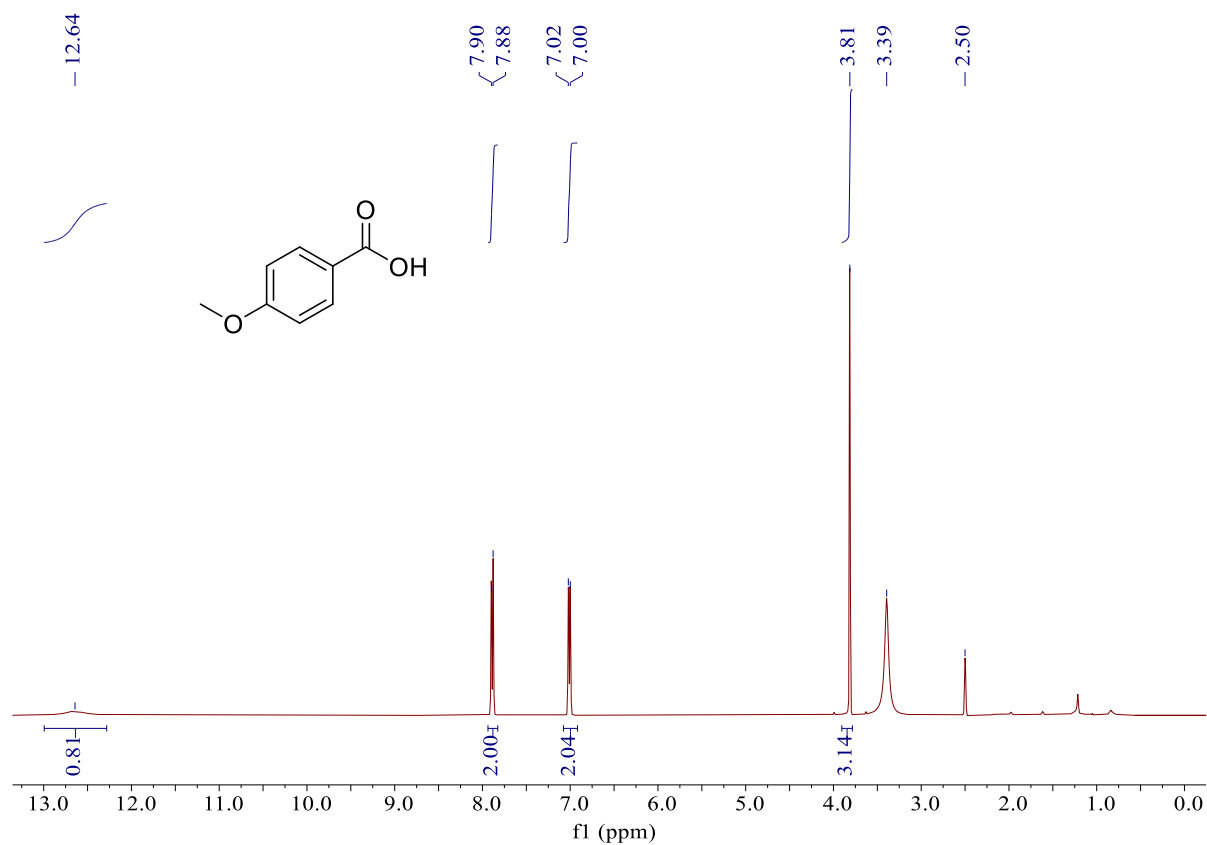

**<sup>13</sup>C NMR of compound 6b:**

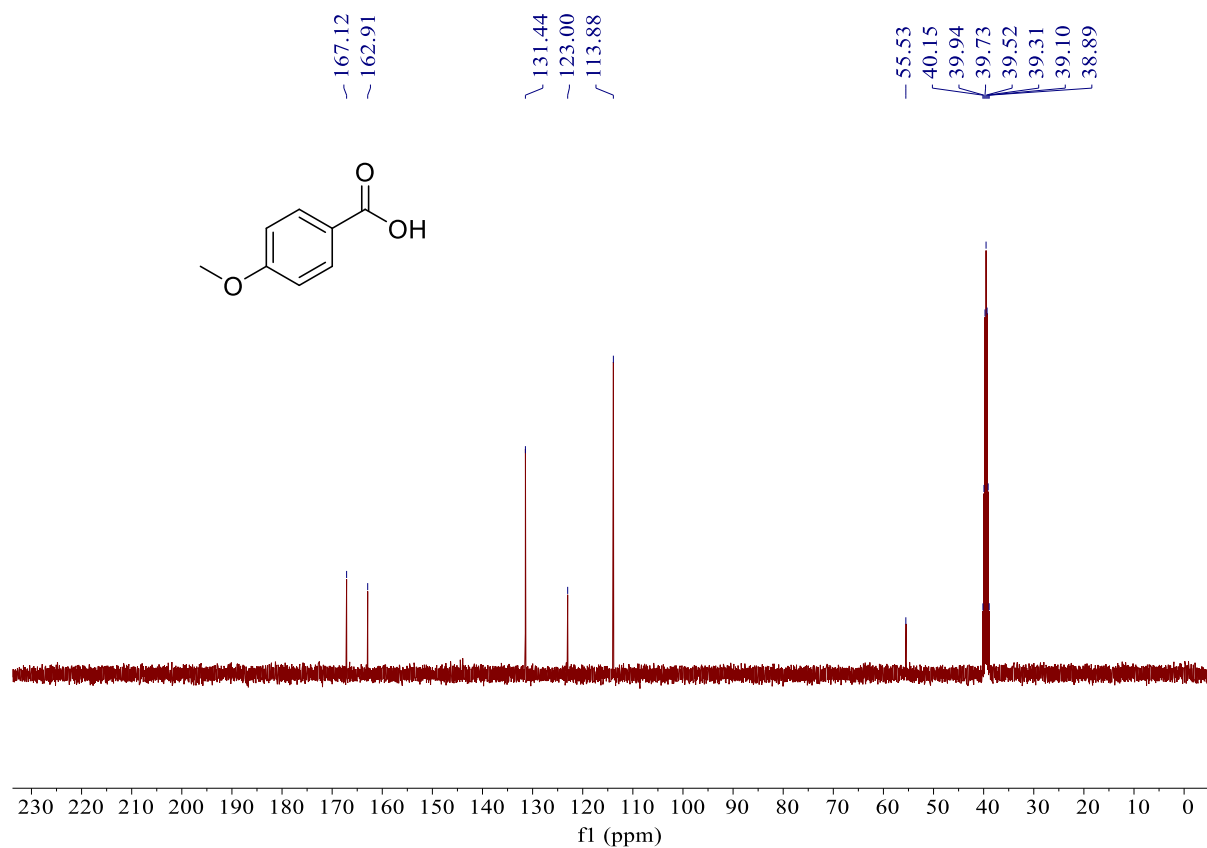

**<sup>1</sup>H NMR of compound 6c:**

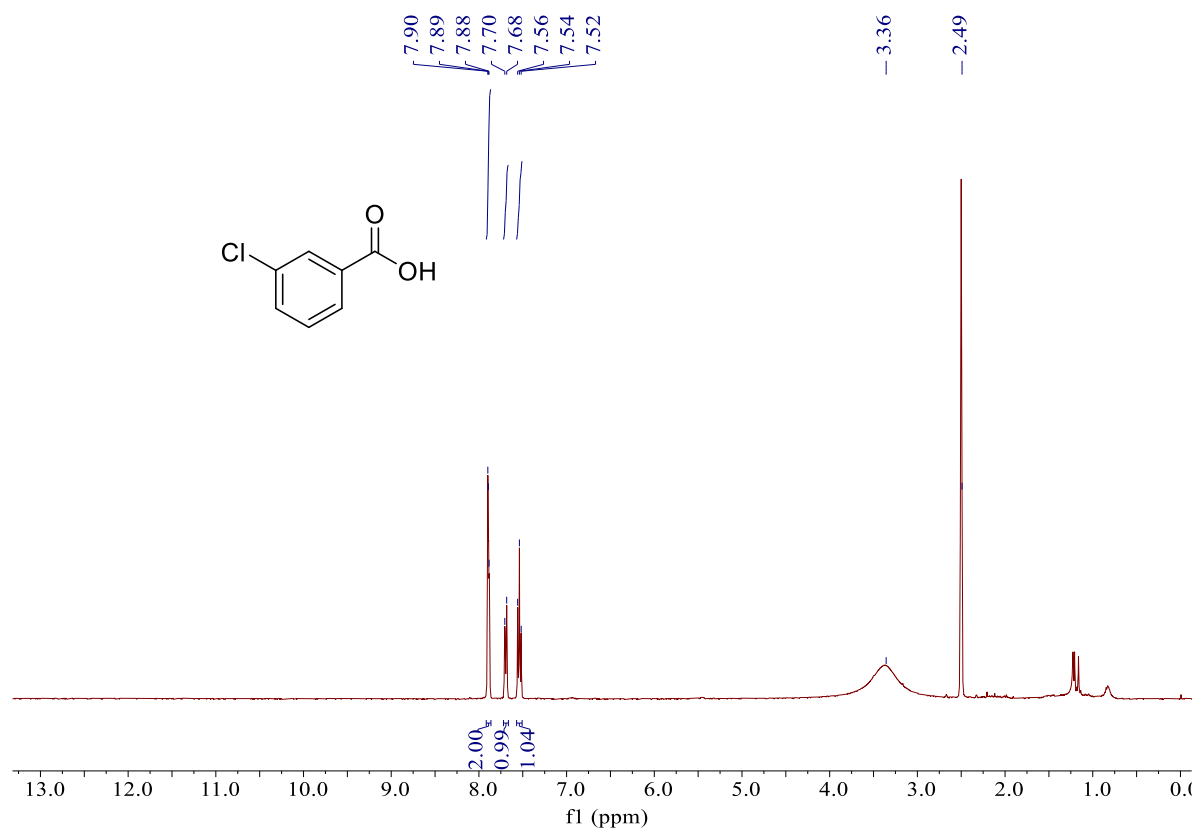

**<sup>13</sup>C NMR of compound 6c:**

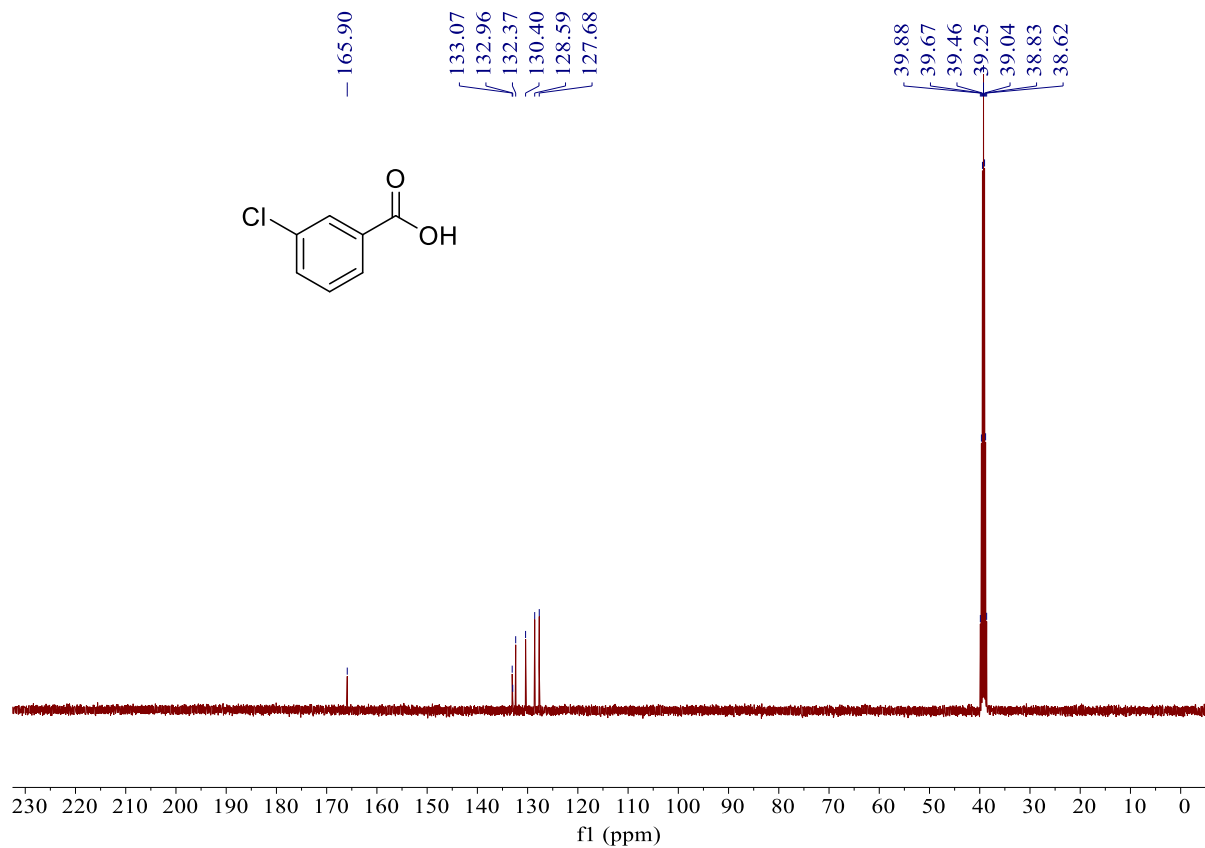

**<sup>1</sup>H NMR of compound 6d:**

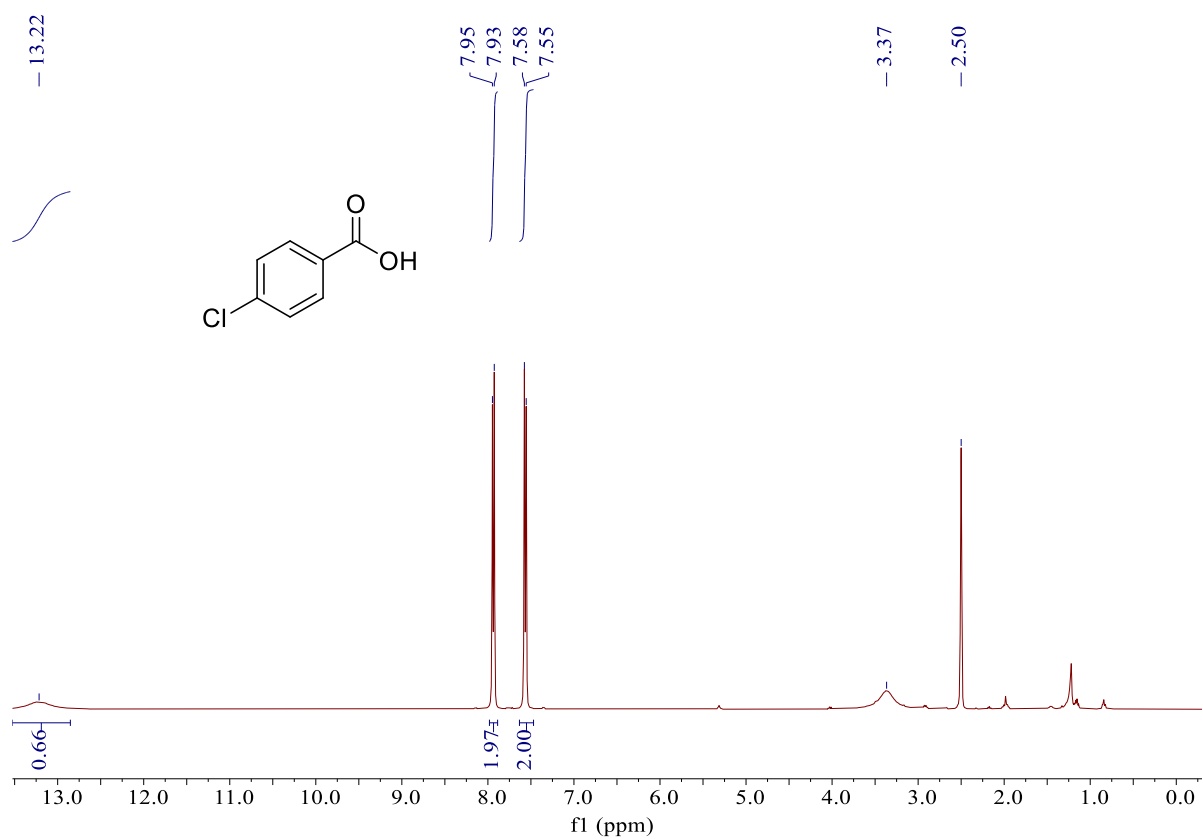

**<sup>13</sup>C NMR of compound 6d:**

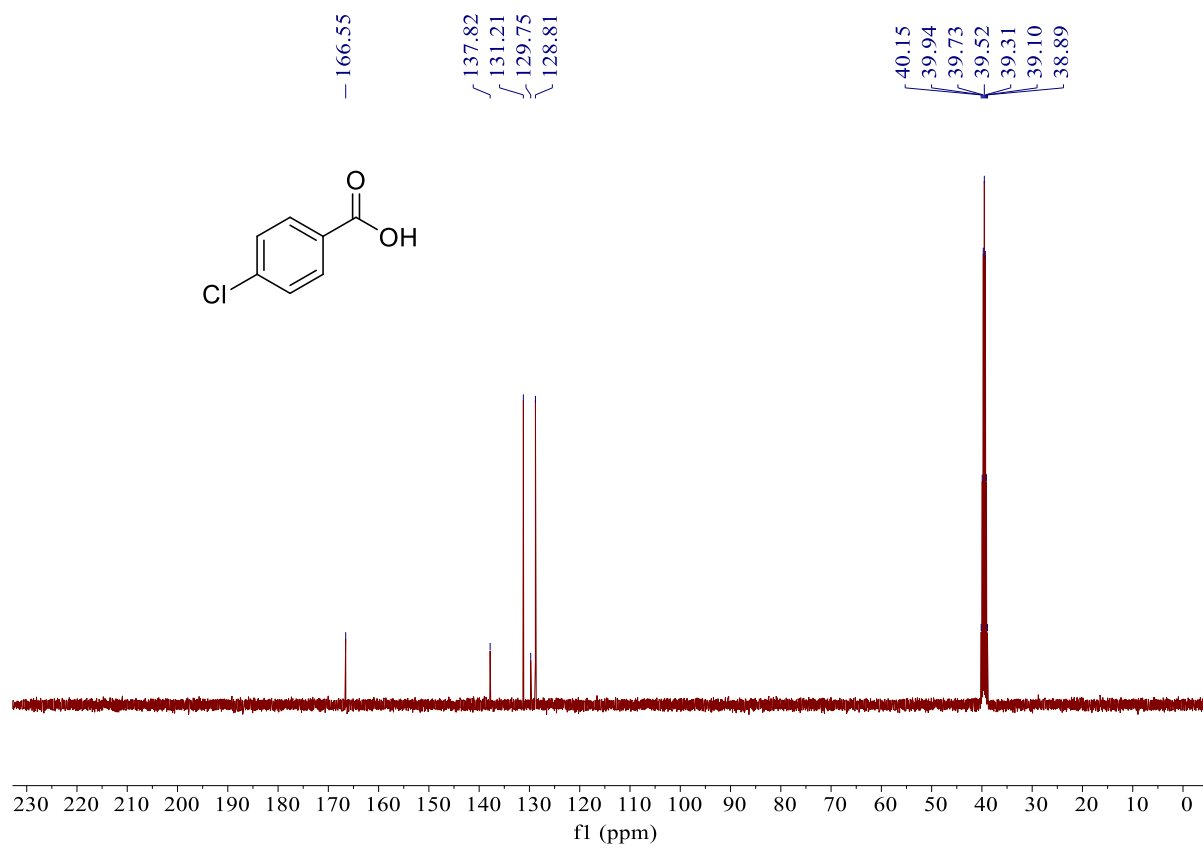



**<sup>1</sup>H NMR of compound 6e:**

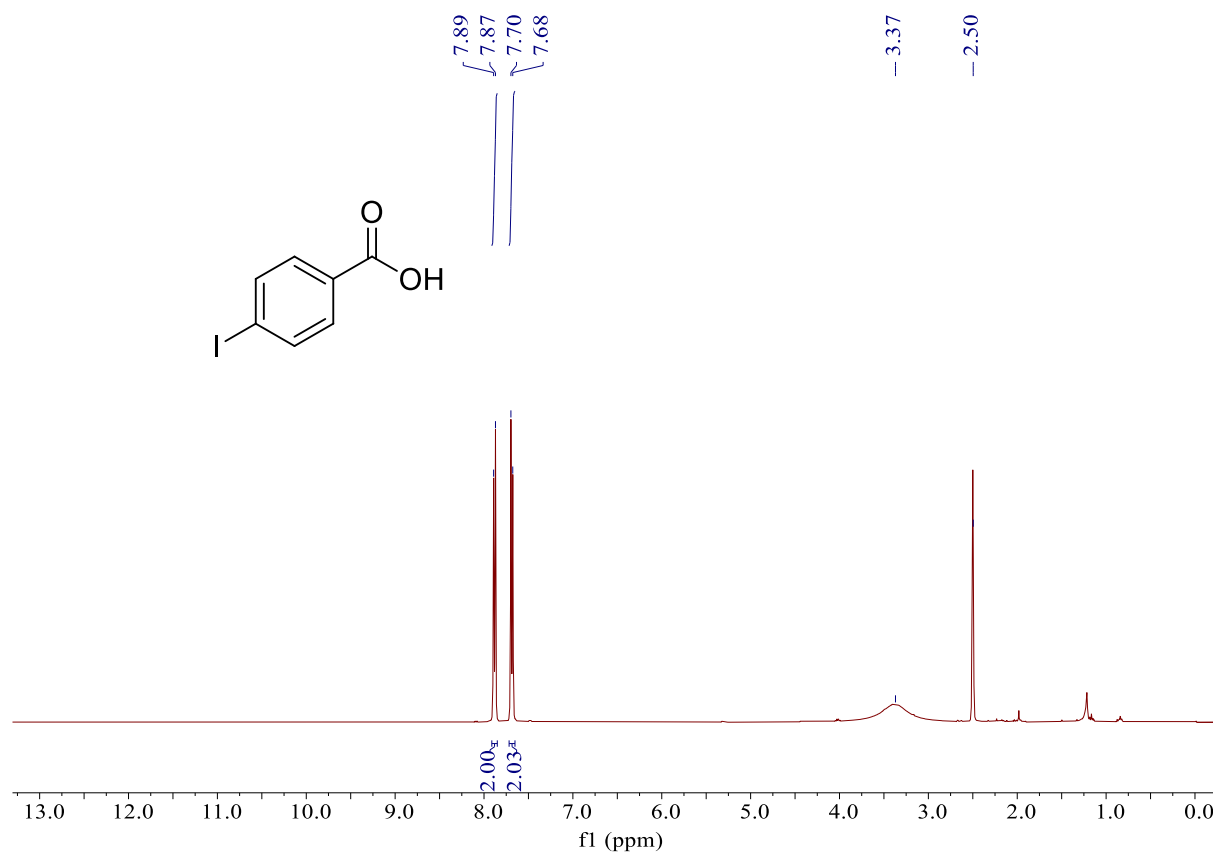

**<sup>13</sup>C NMR of compound 6e:**

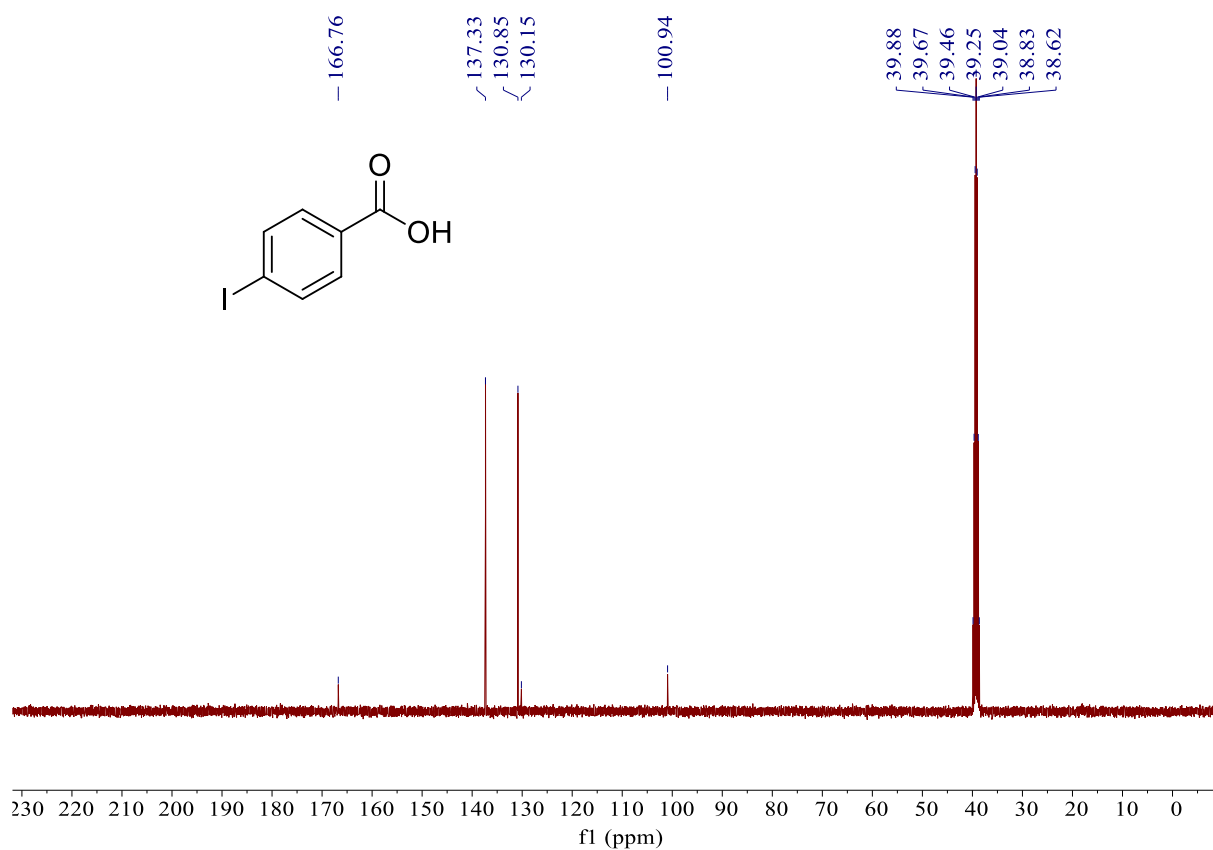

**<sup>1</sup>H NMR of compound 6f:**

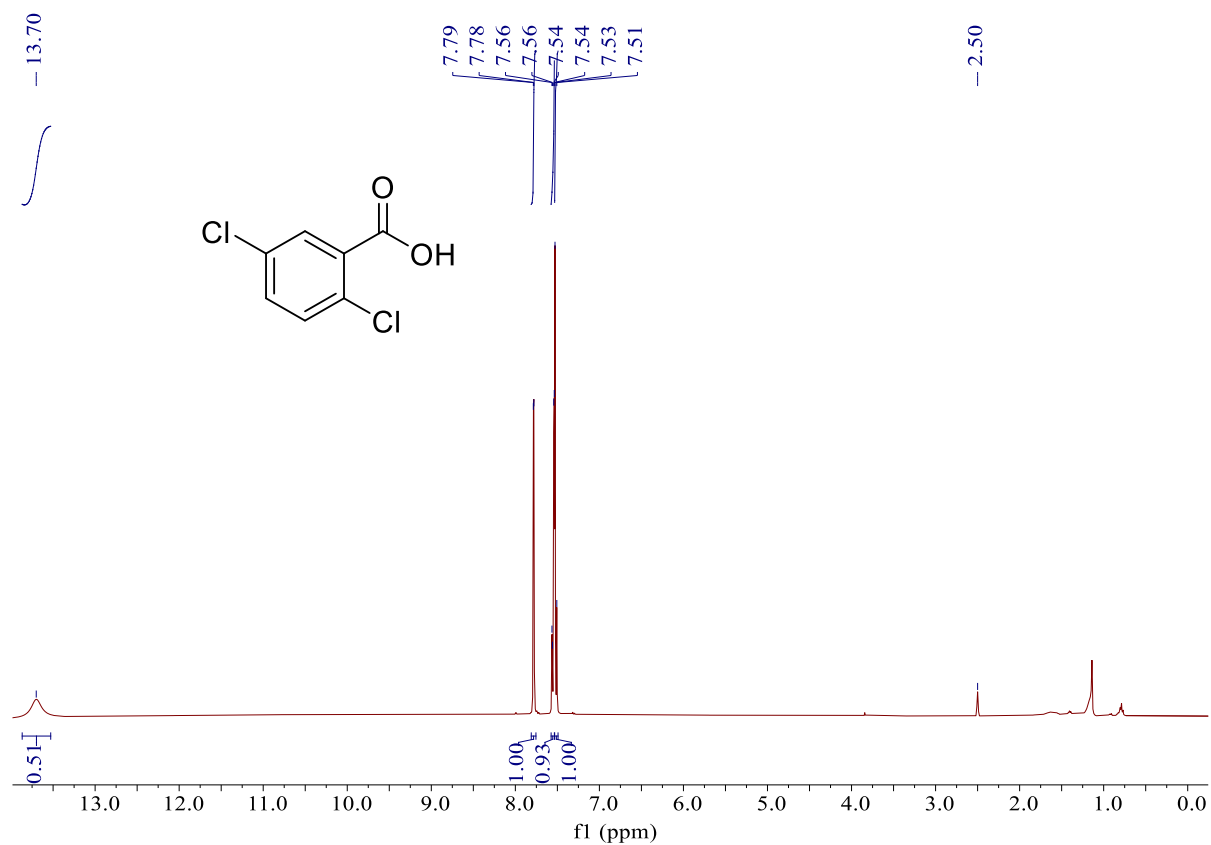

**<sup>13</sup>C NMR of compound 6f:**

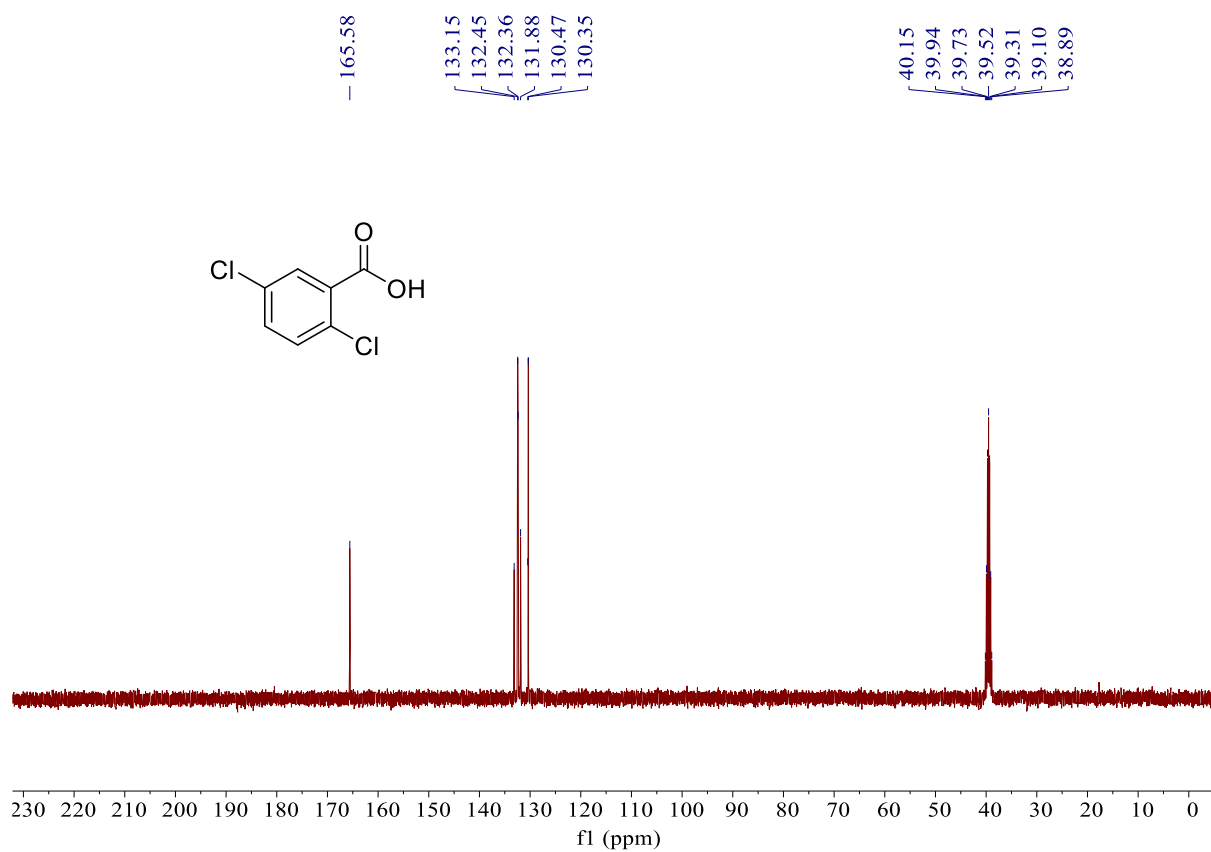

**<sup>1</sup>H NMR of compound 6g:**

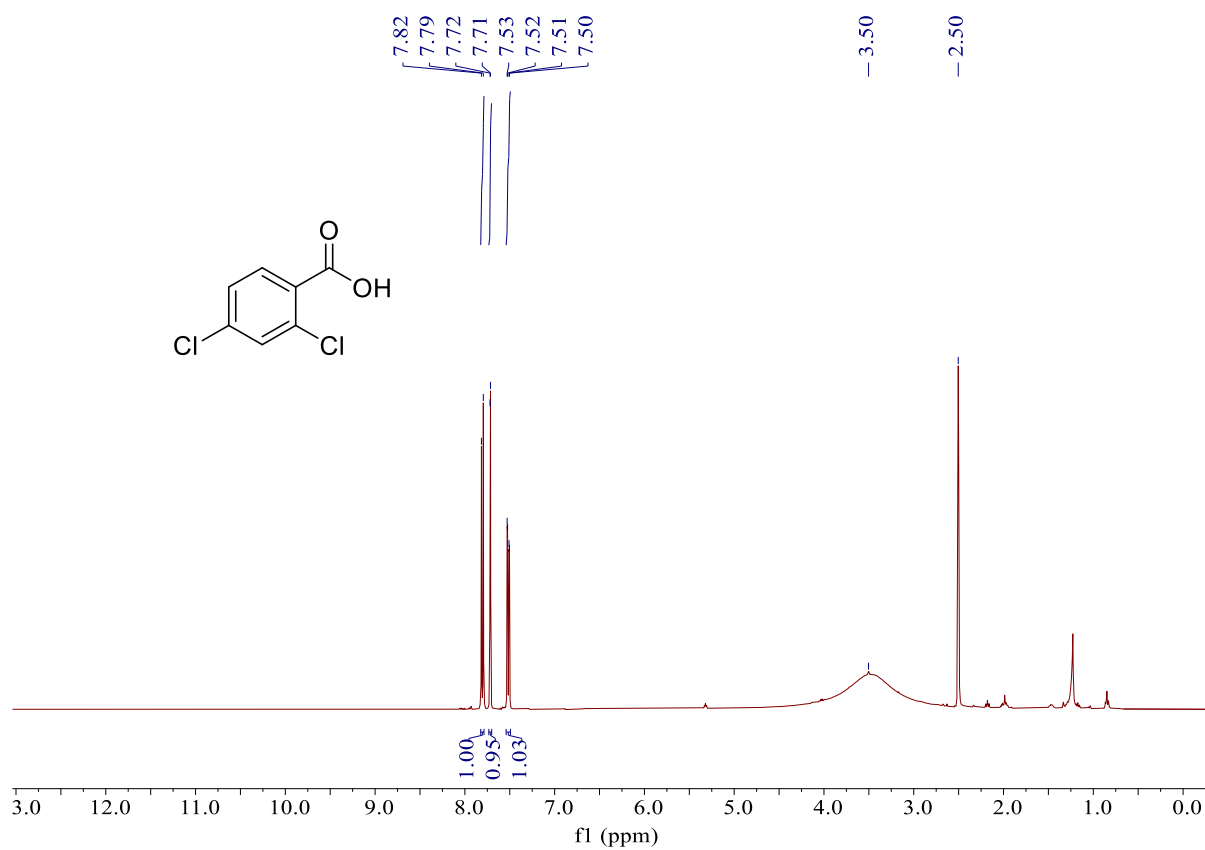

**<sup>13</sup>C NMR of compound 6g:**

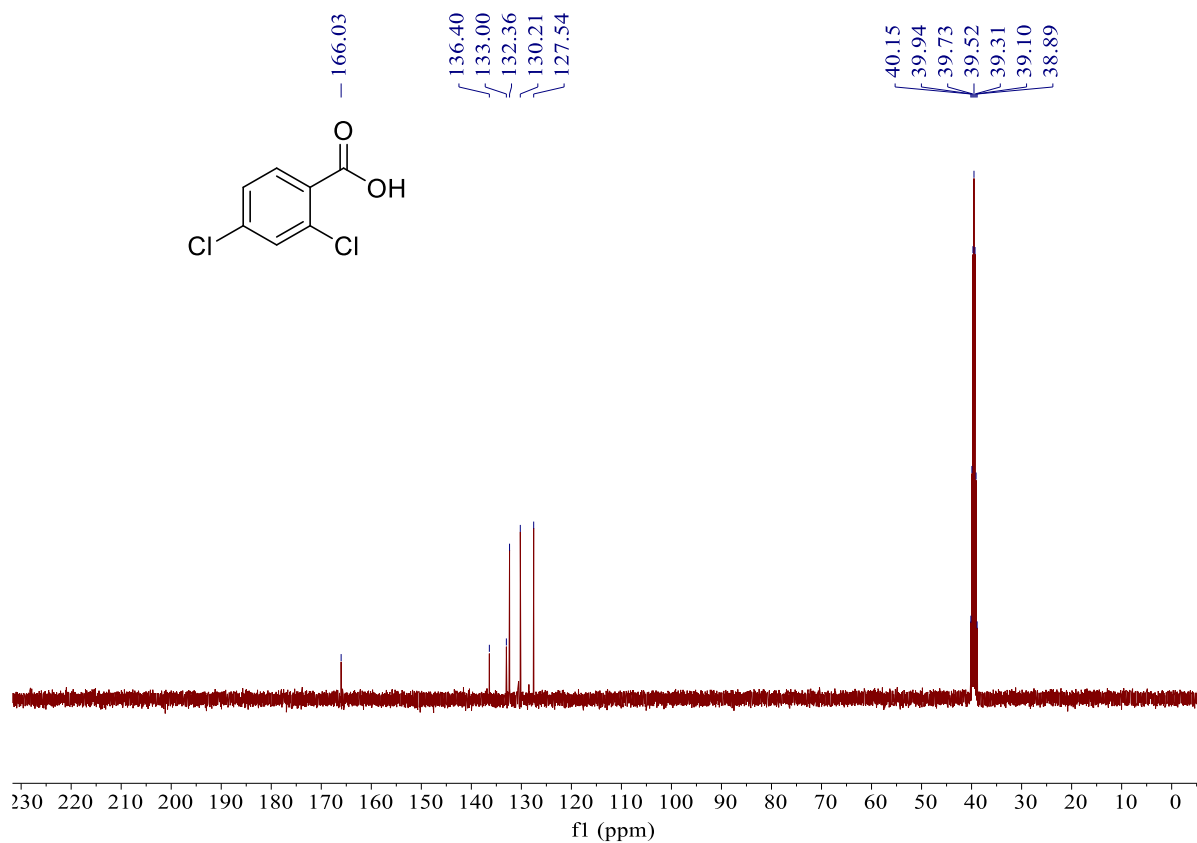

**<sup>1</sup>H NMR of compound 6h:**

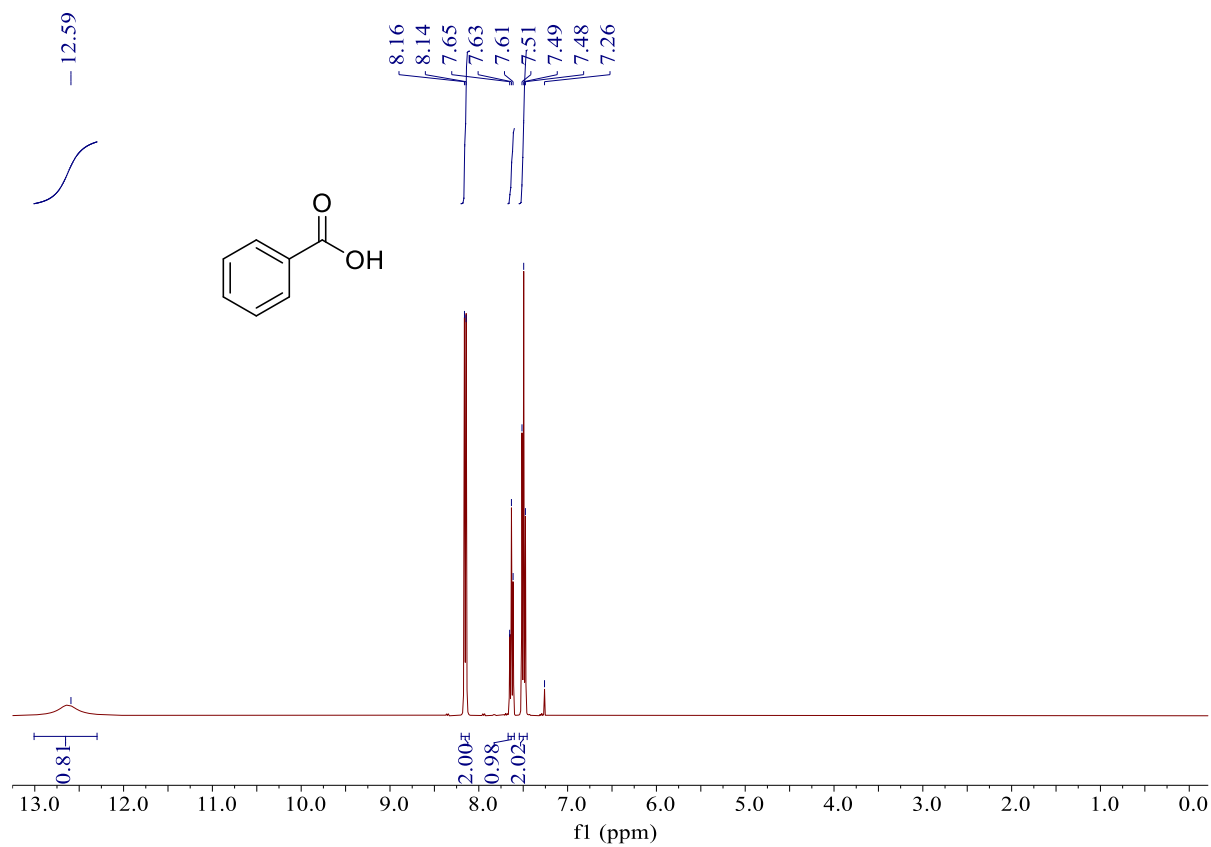

**<sup>13</sup>C NMR of compound 6h:**

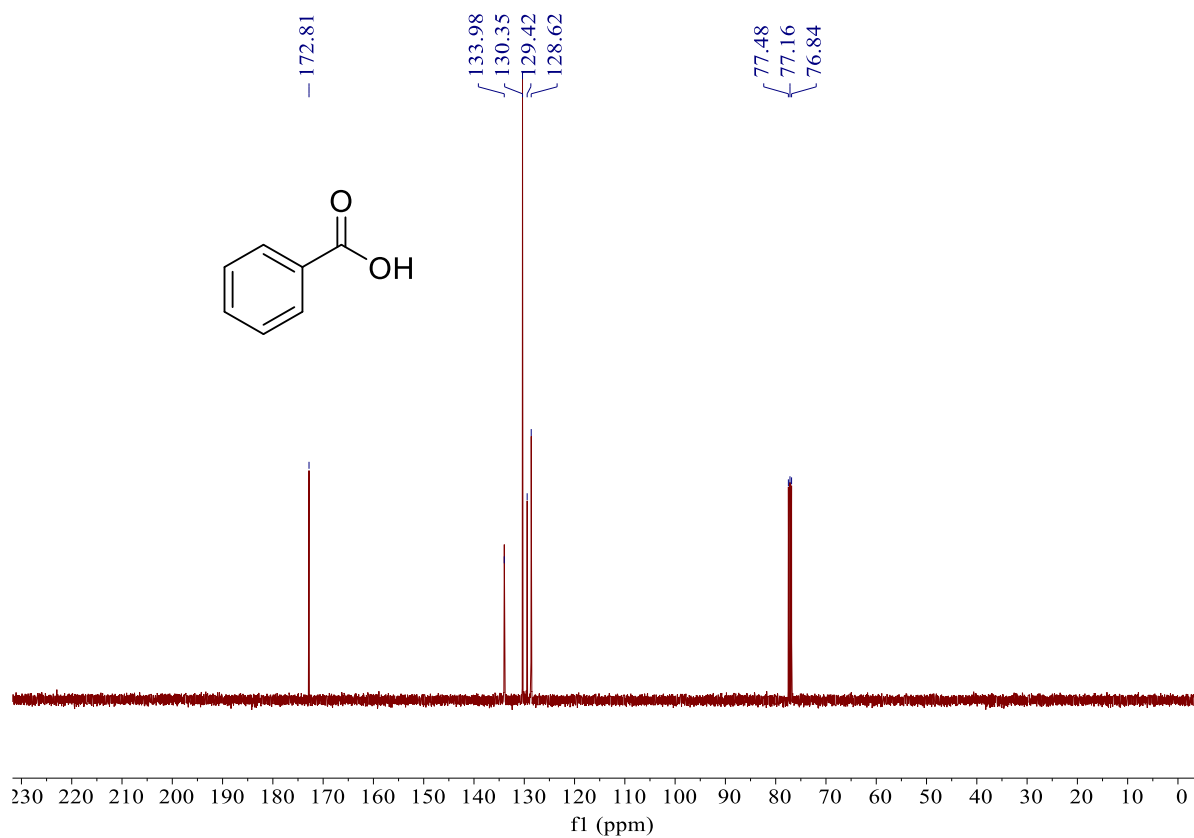

**<sup>1</sup>H NMR of compound 6h':**

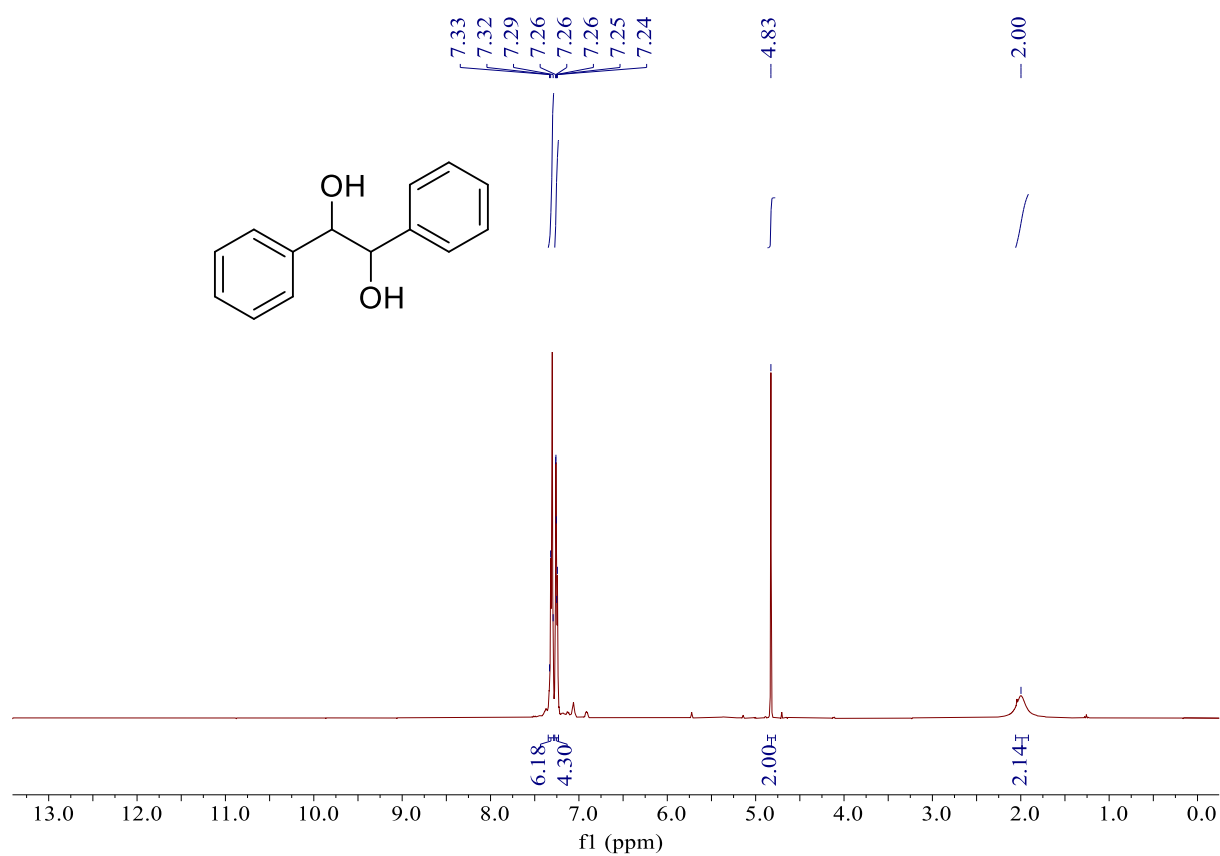

**<sup>13</sup>C NMR of compound 6h':**

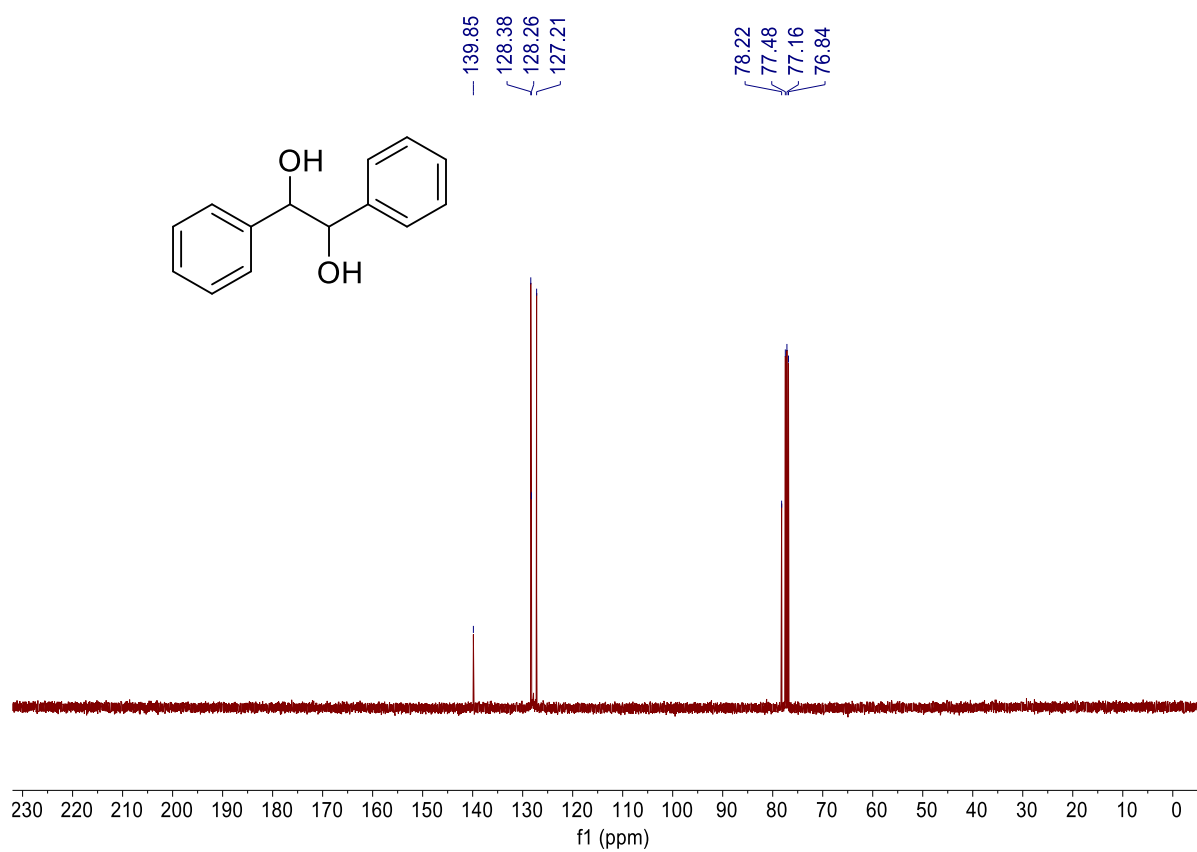

**<sup>1</sup>H NMR of compound 6i:**

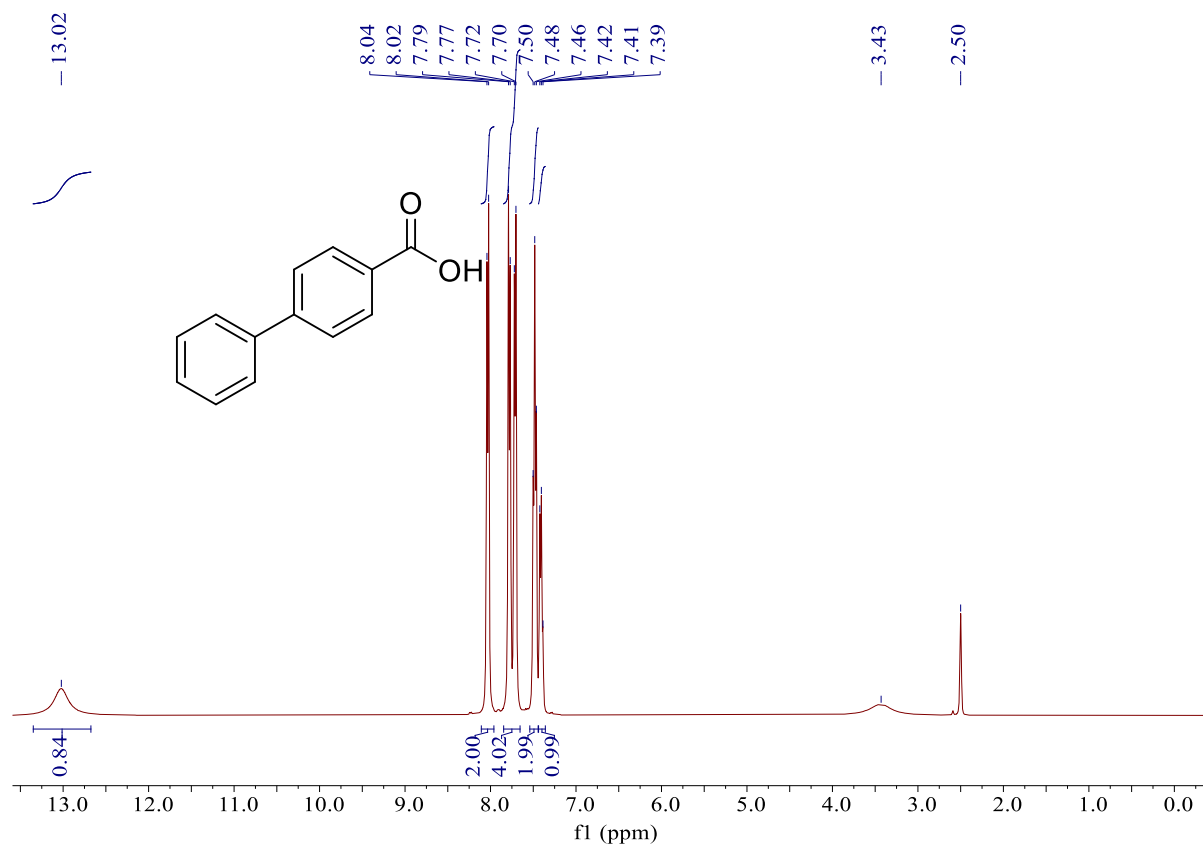

**<sup>13</sup>C NMR of compound 6i:**

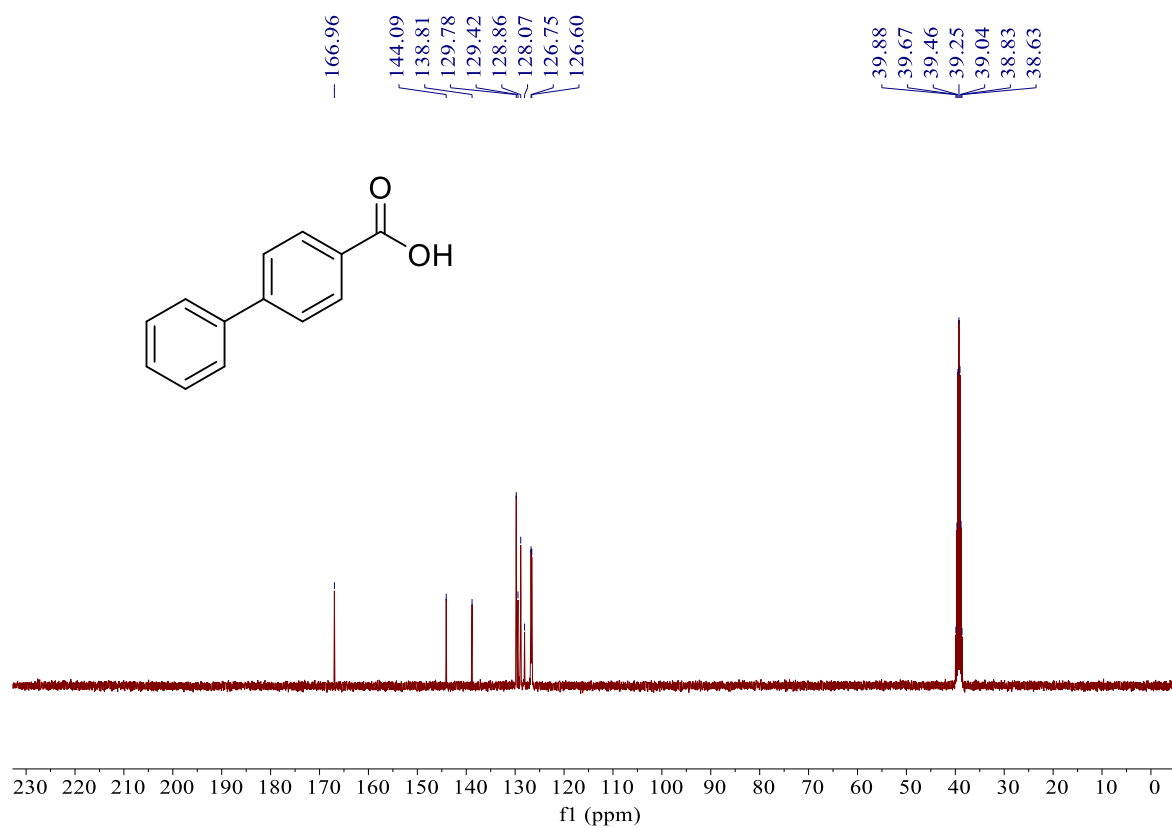

**<sup>1</sup>H NMR of compound 6j:**

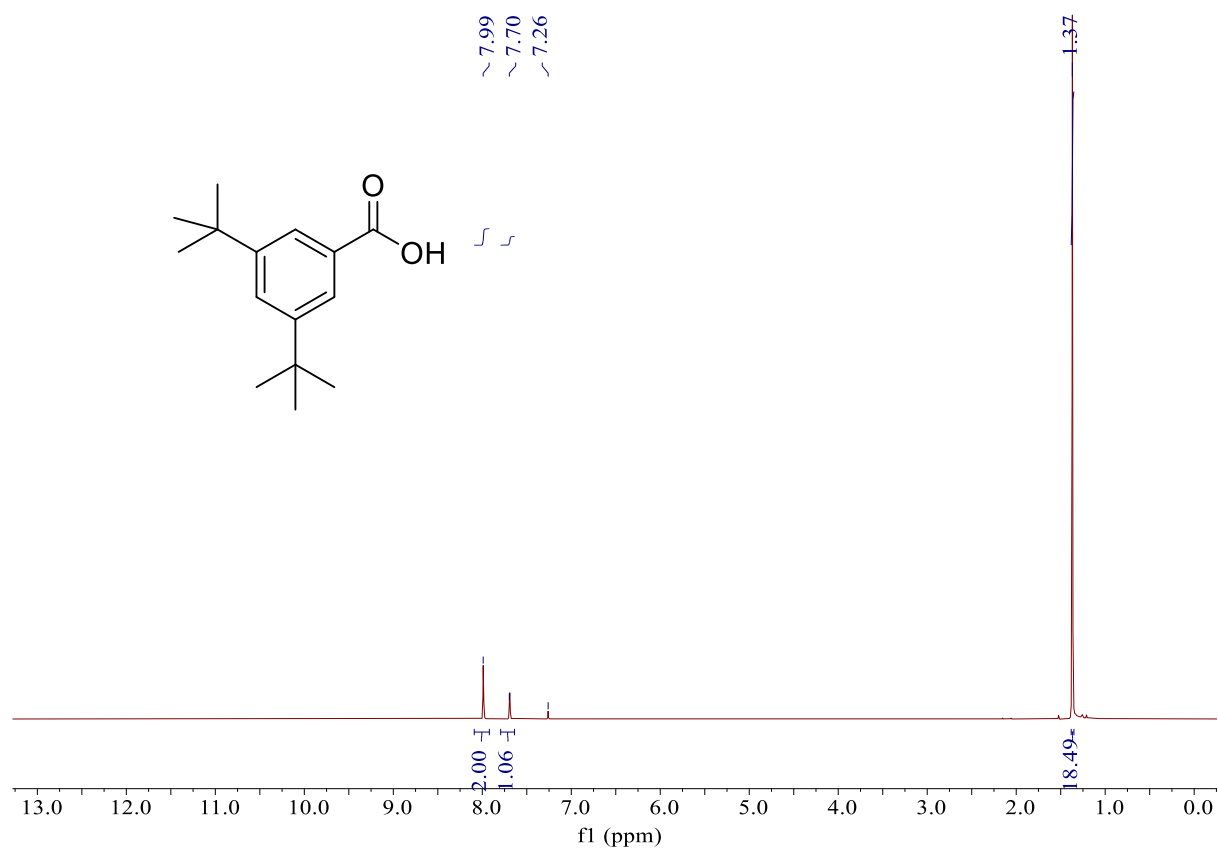

**<sup>13</sup>C NMR of compound 6j:**

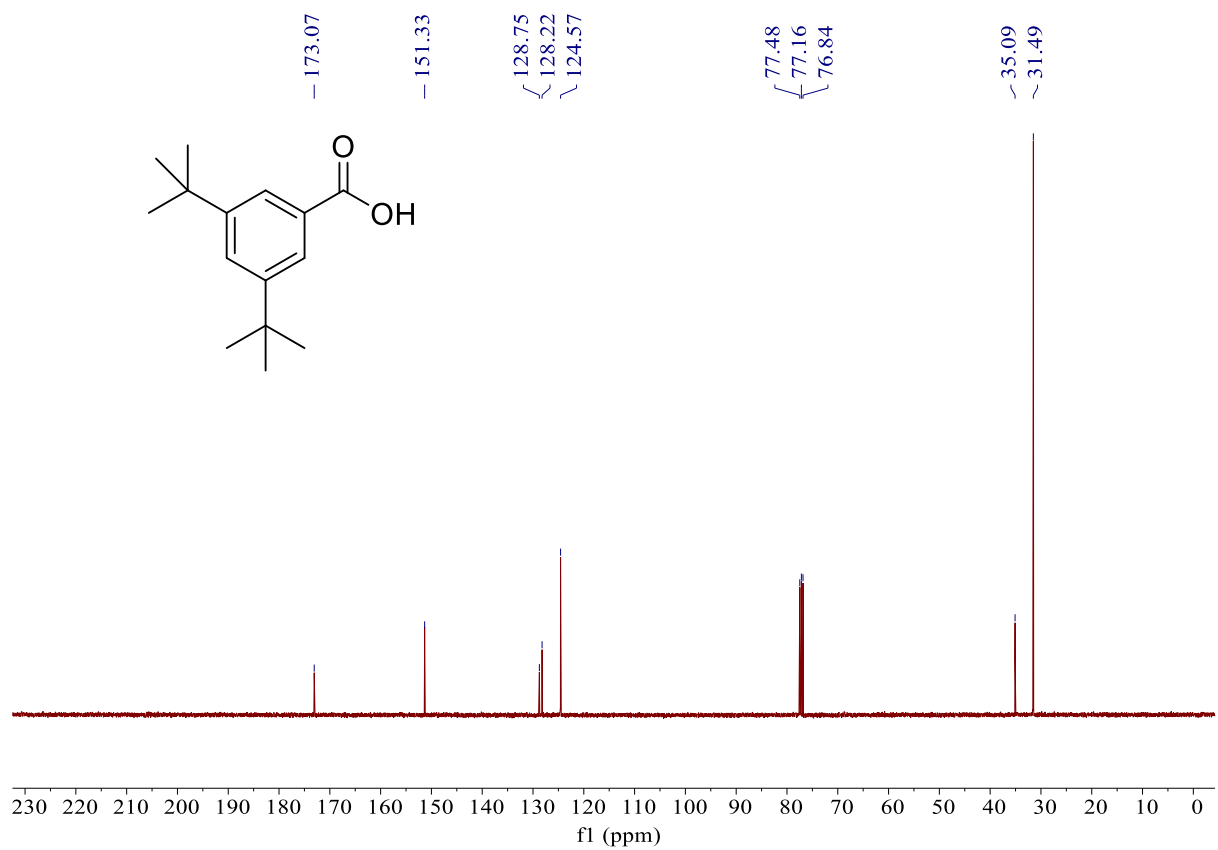

**<sup>1</sup>H NMR of compound 6k:**

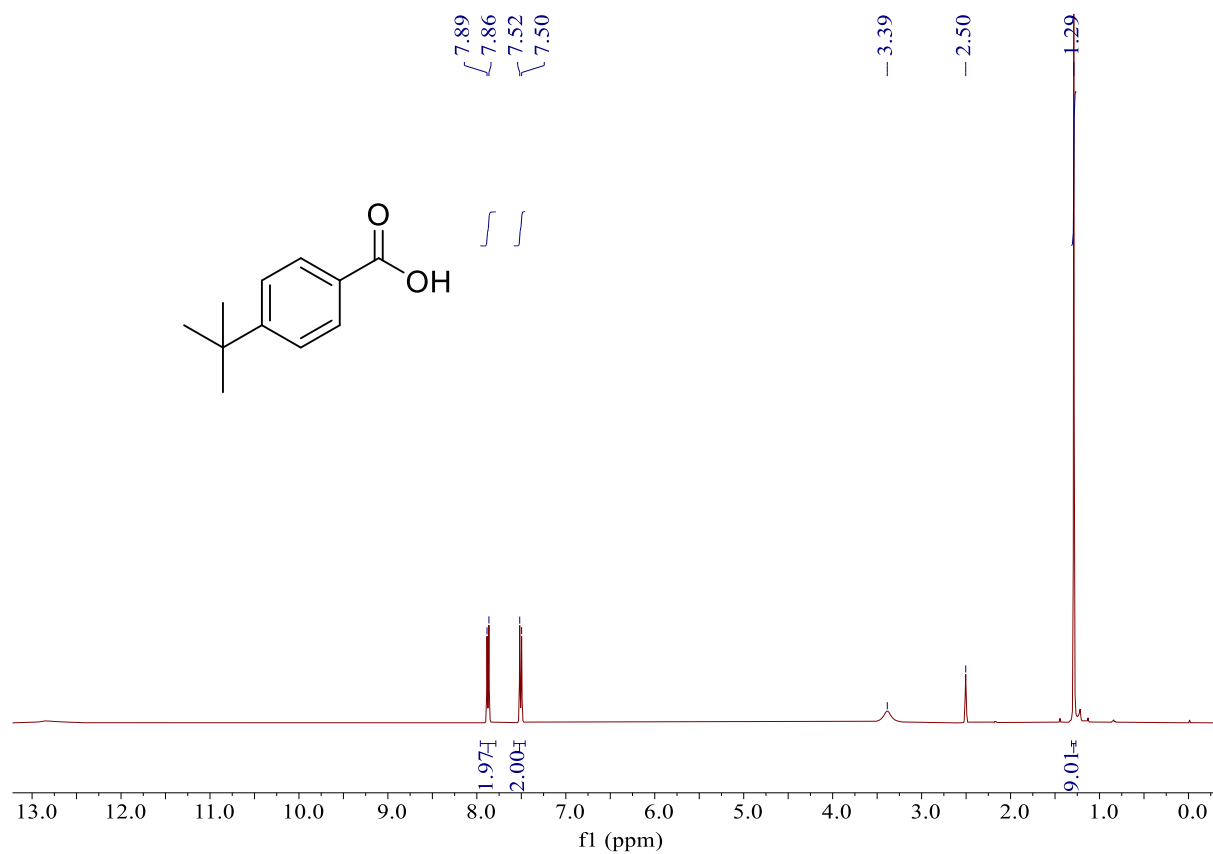

**<sup>13</sup>C NMR of compound 6k:**

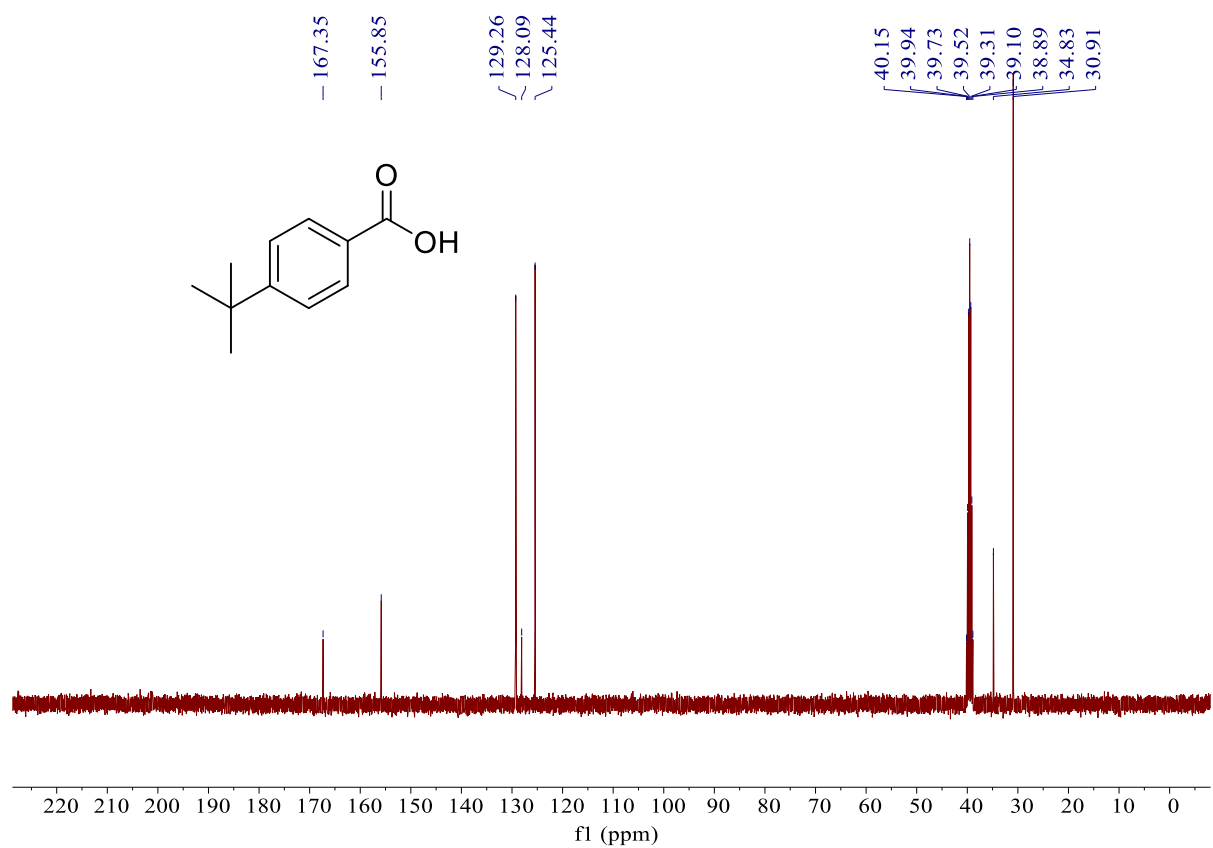



**<sup>1</sup>H NMR of compound 6l:**

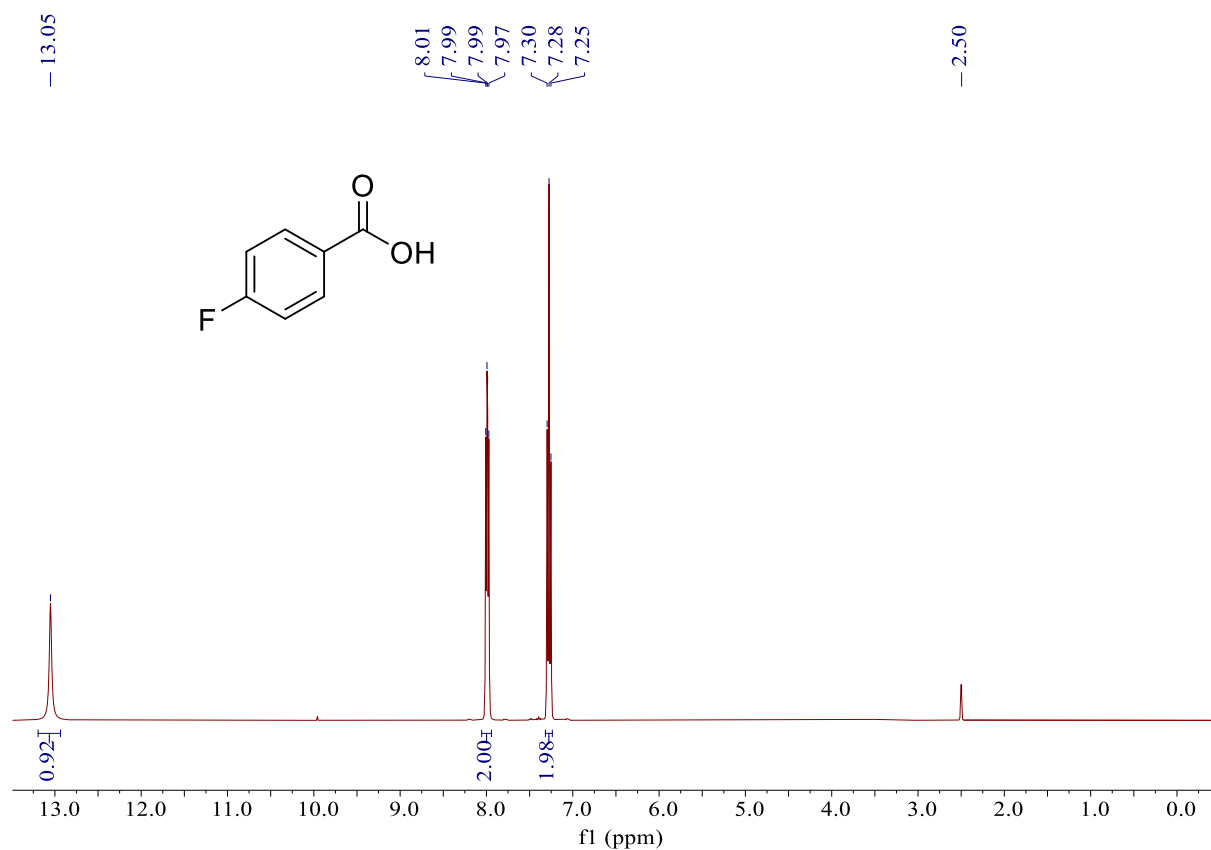

**<sup>13</sup>C NMR of compound 6l:**

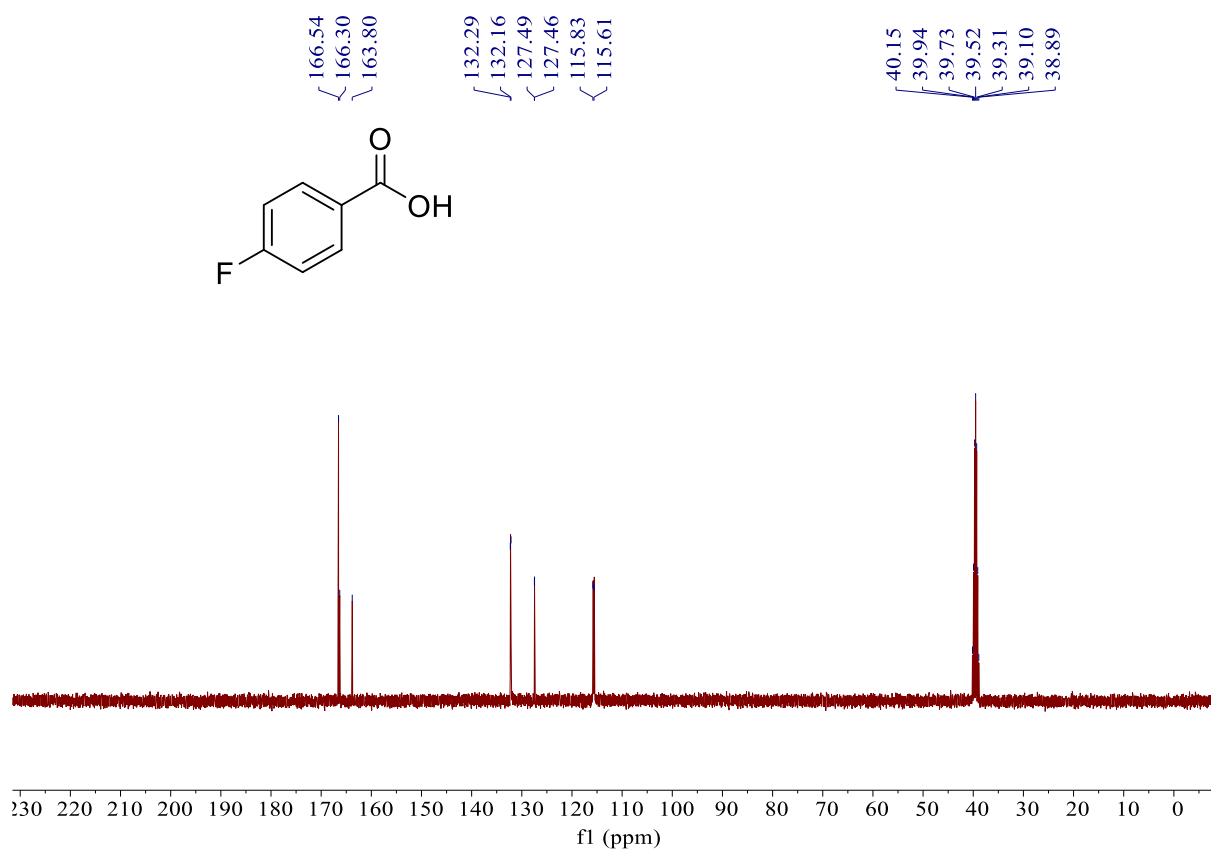

**<sup>1</sup>H NMR of compound 6m:**

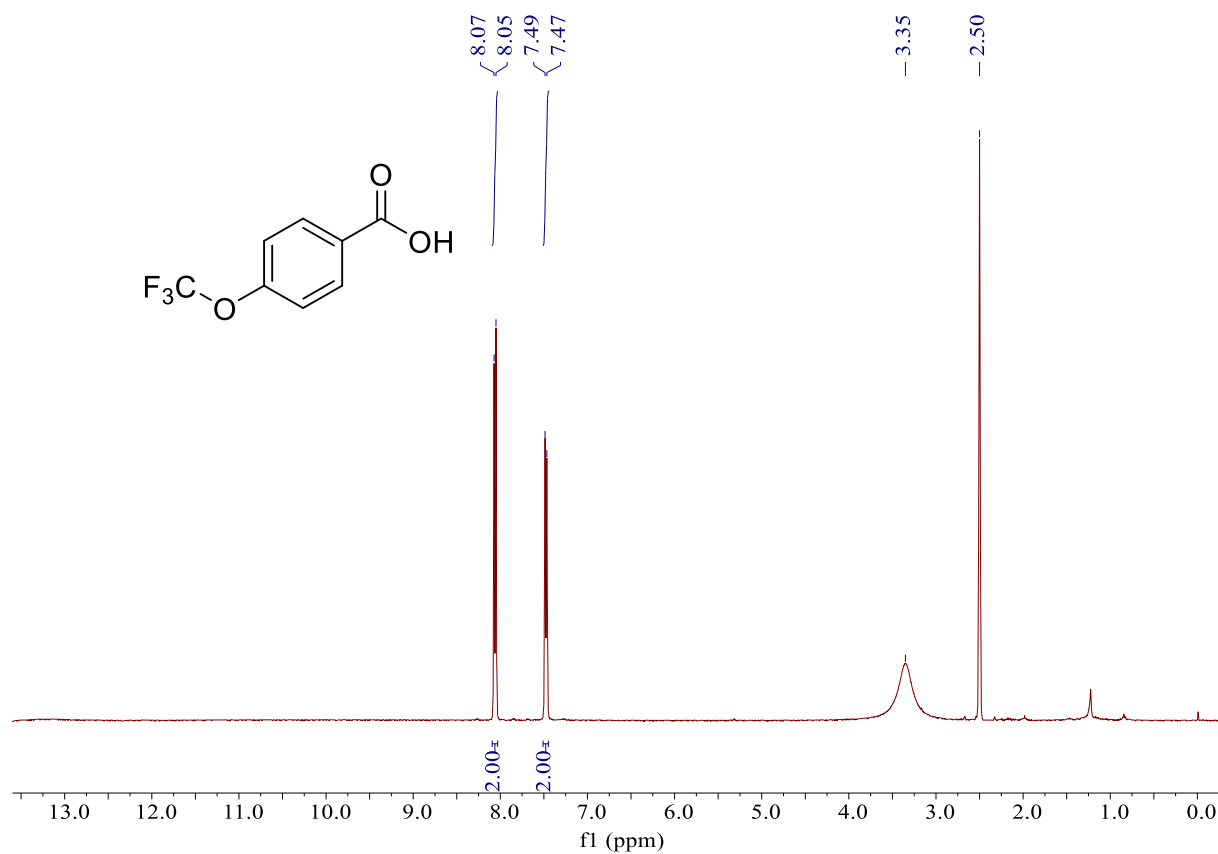

**<sup>13</sup>C NMR of compound 6m:**

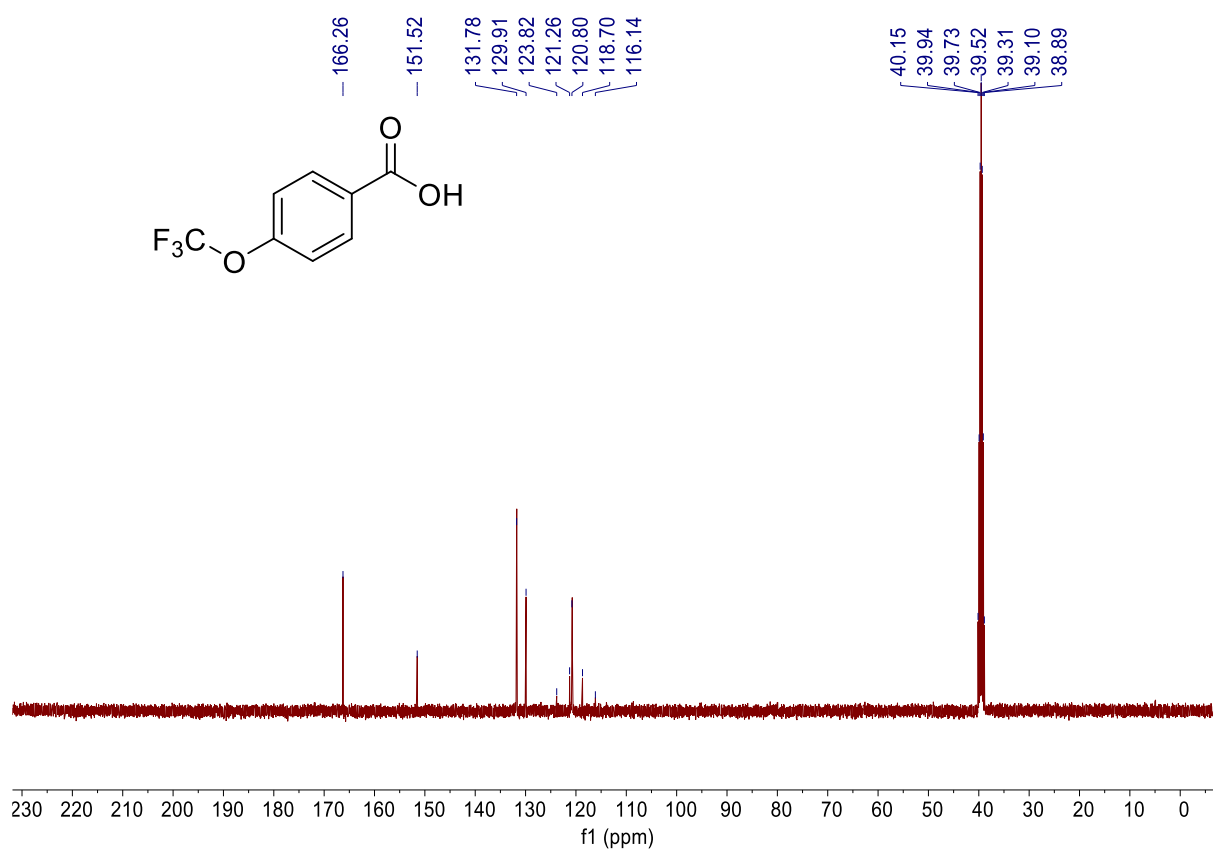

**<sup>1</sup>H NMR of compound 13a:**

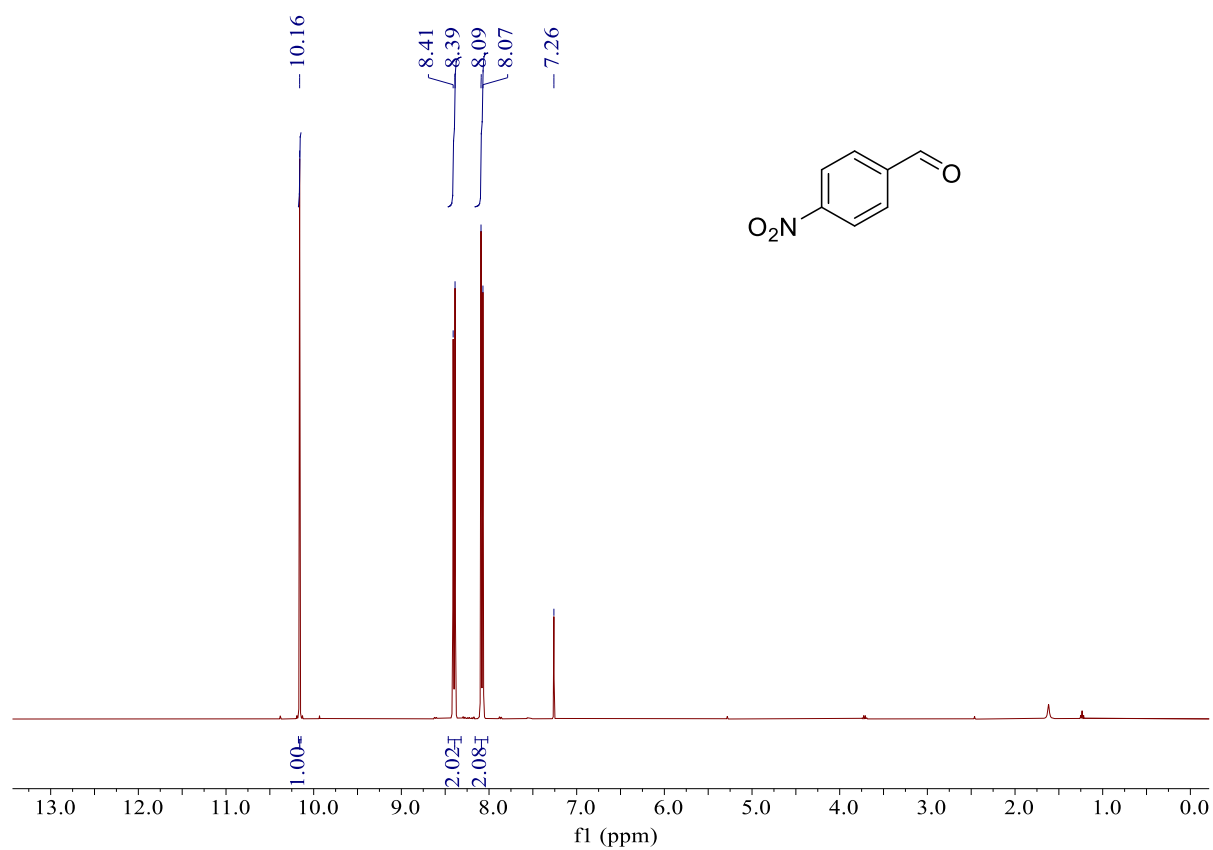

**<sup>13</sup>C NMR of compound 13a:**

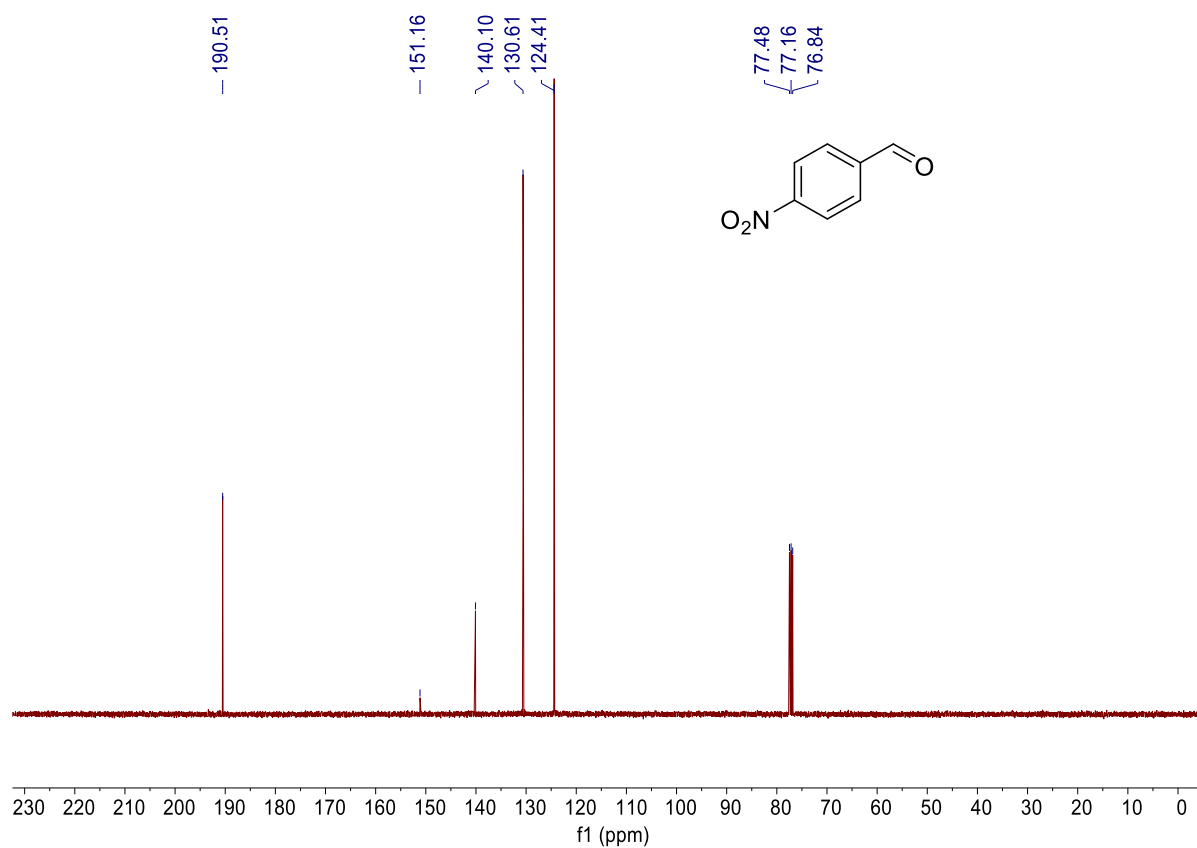

**<sup>1</sup>H NMR of compound 13b:**

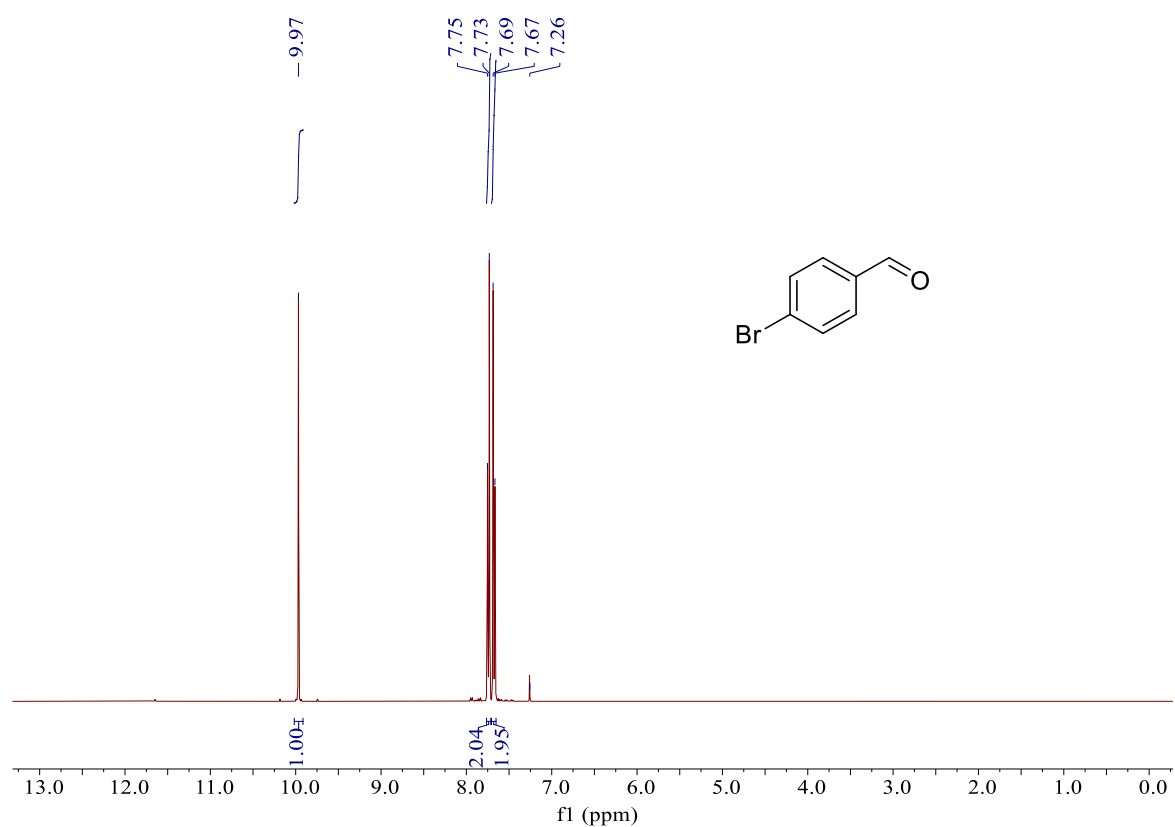

**<sup>13</sup>C NMR of compound 13b:**

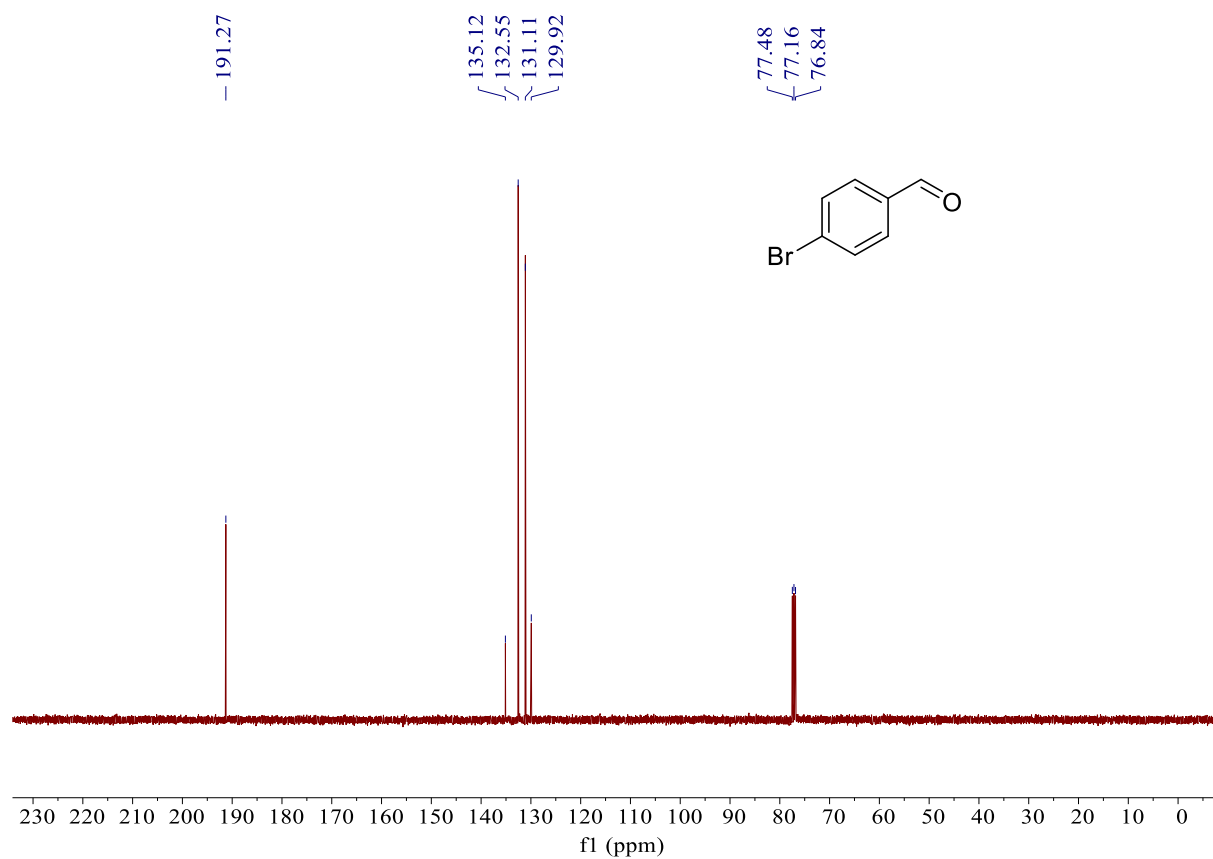

**<sup>1</sup>H NMR of compound 13c:**

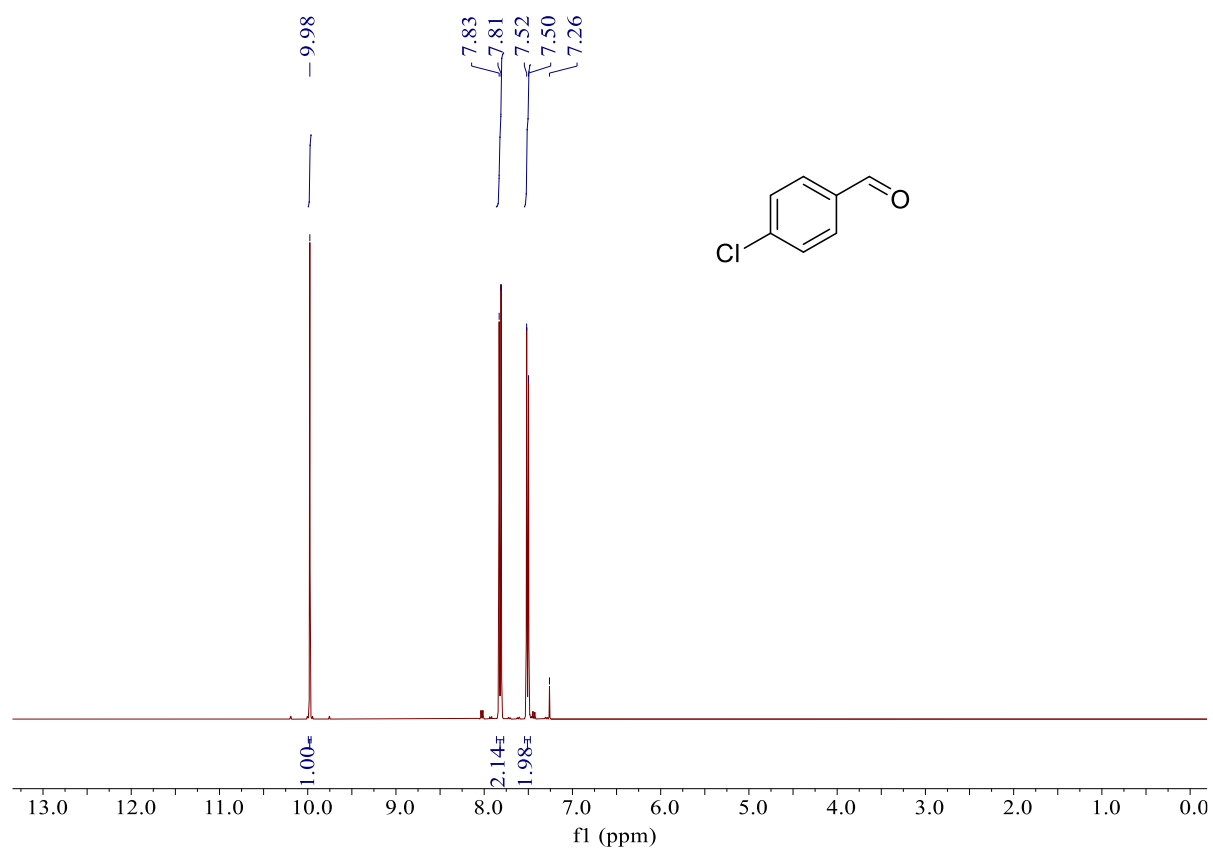

**<sup>13</sup>C NMR of compound 13c:**

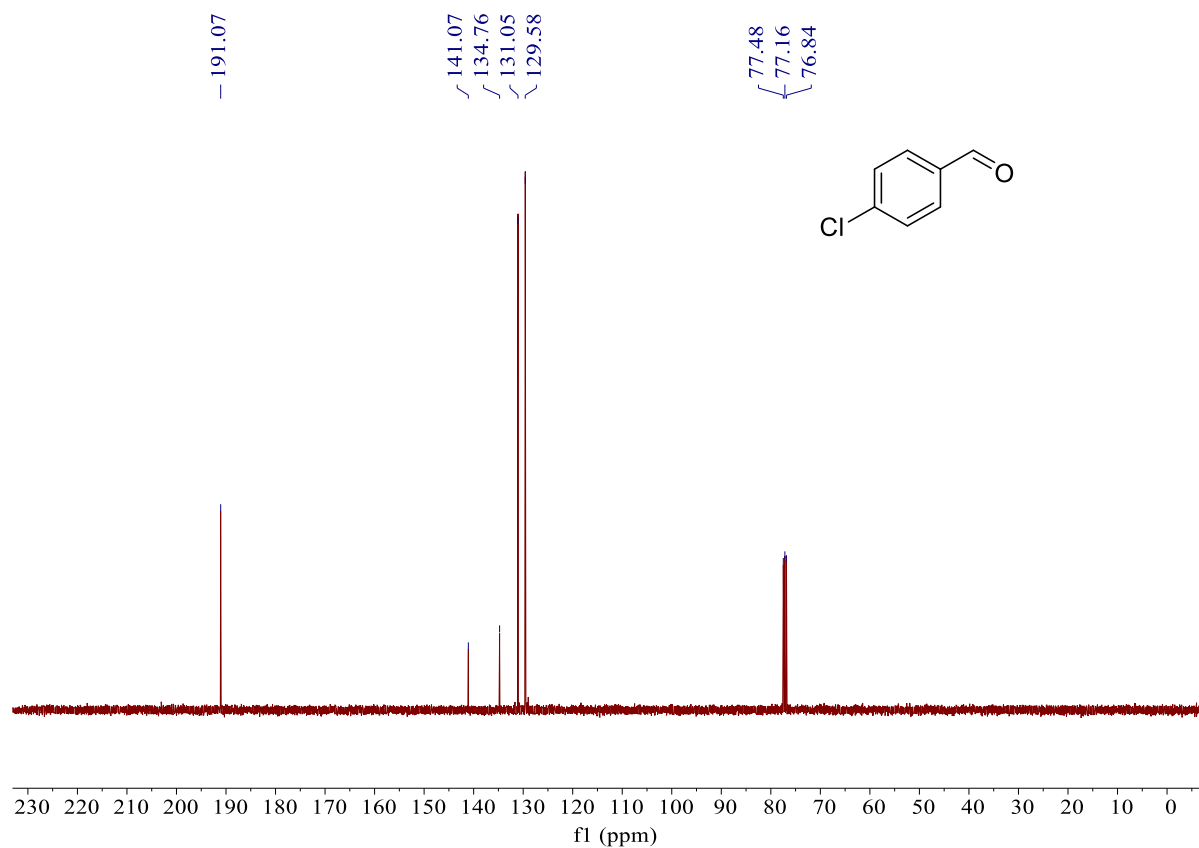

**<sup>1</sup>H NMR of compound 13d:**

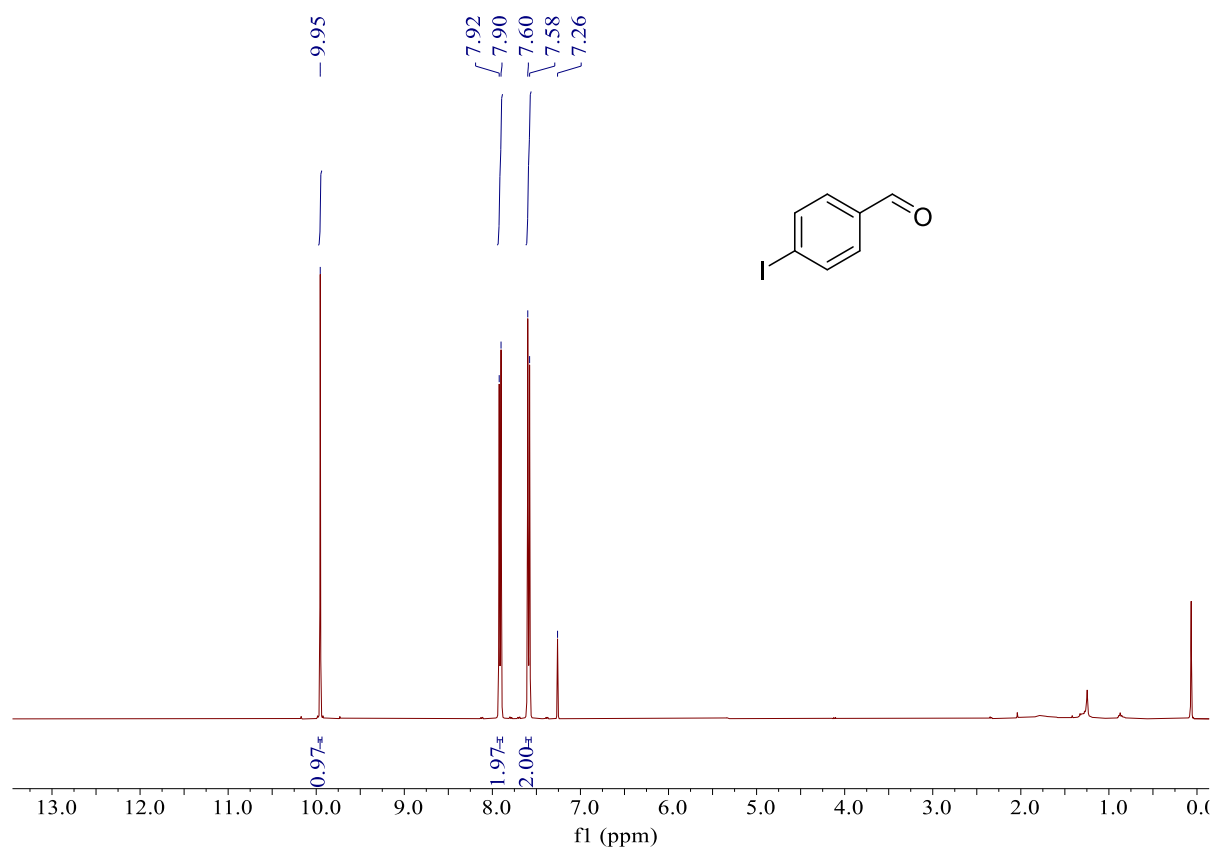

**<sup>13</sup>C NMR of compound 13d:**

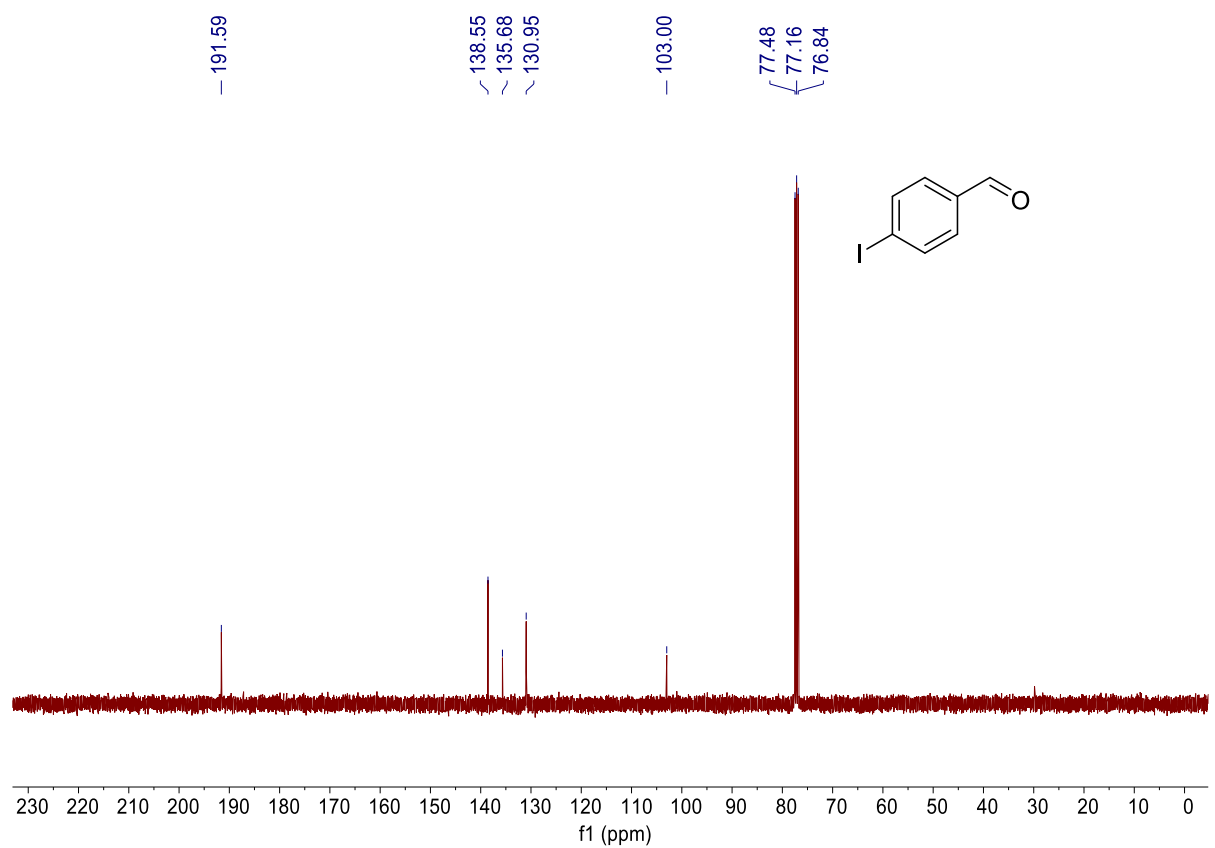

**<sup>1</sup>H NMR of compound 13e:**

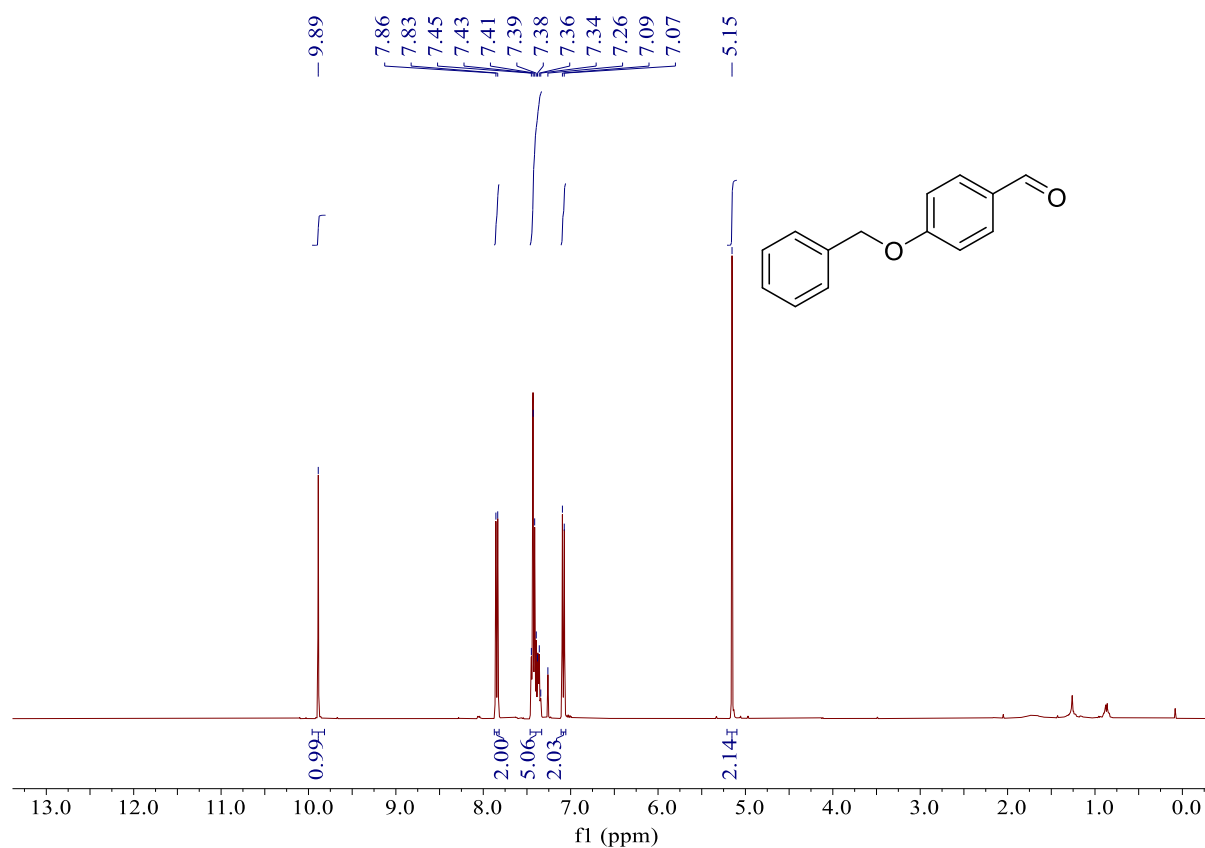

**<sup>13</sup>C NMR of compound 13e:**

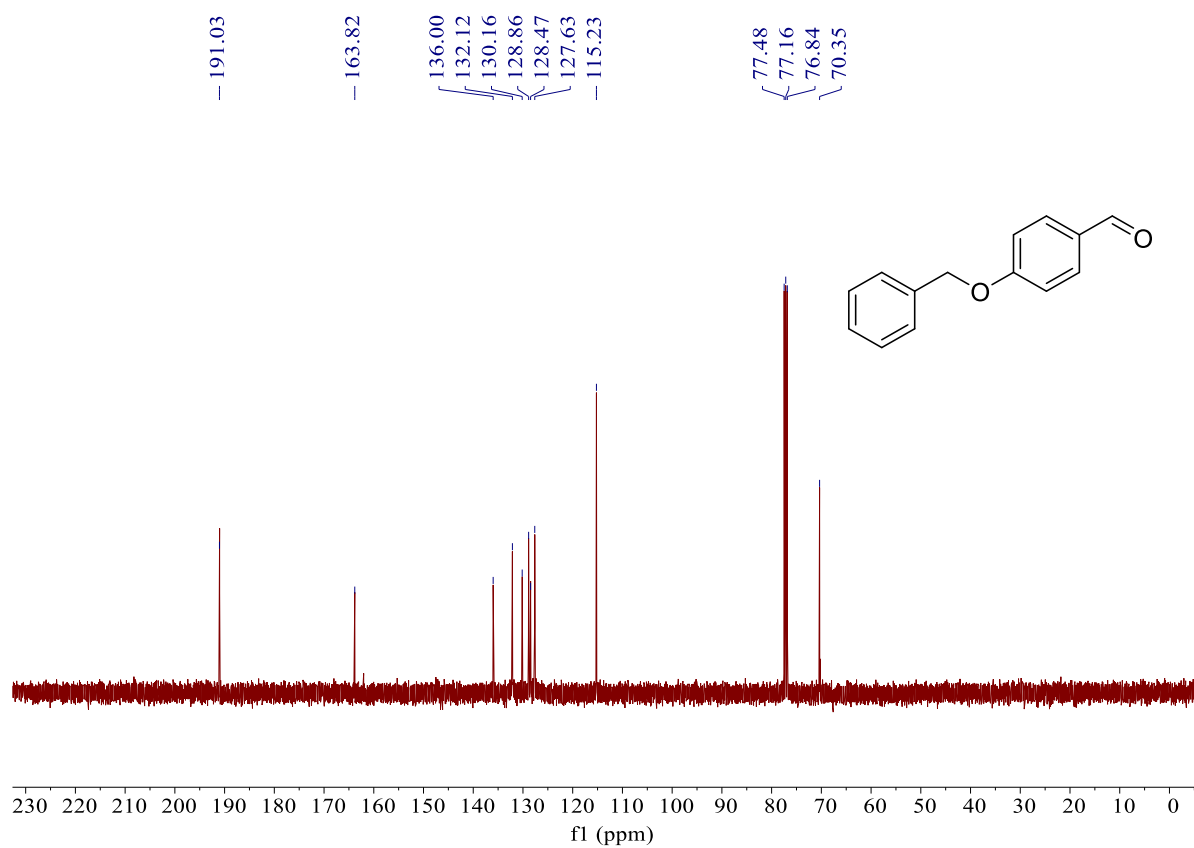

**<sup>1</sup>H NMR of compound 13f:**

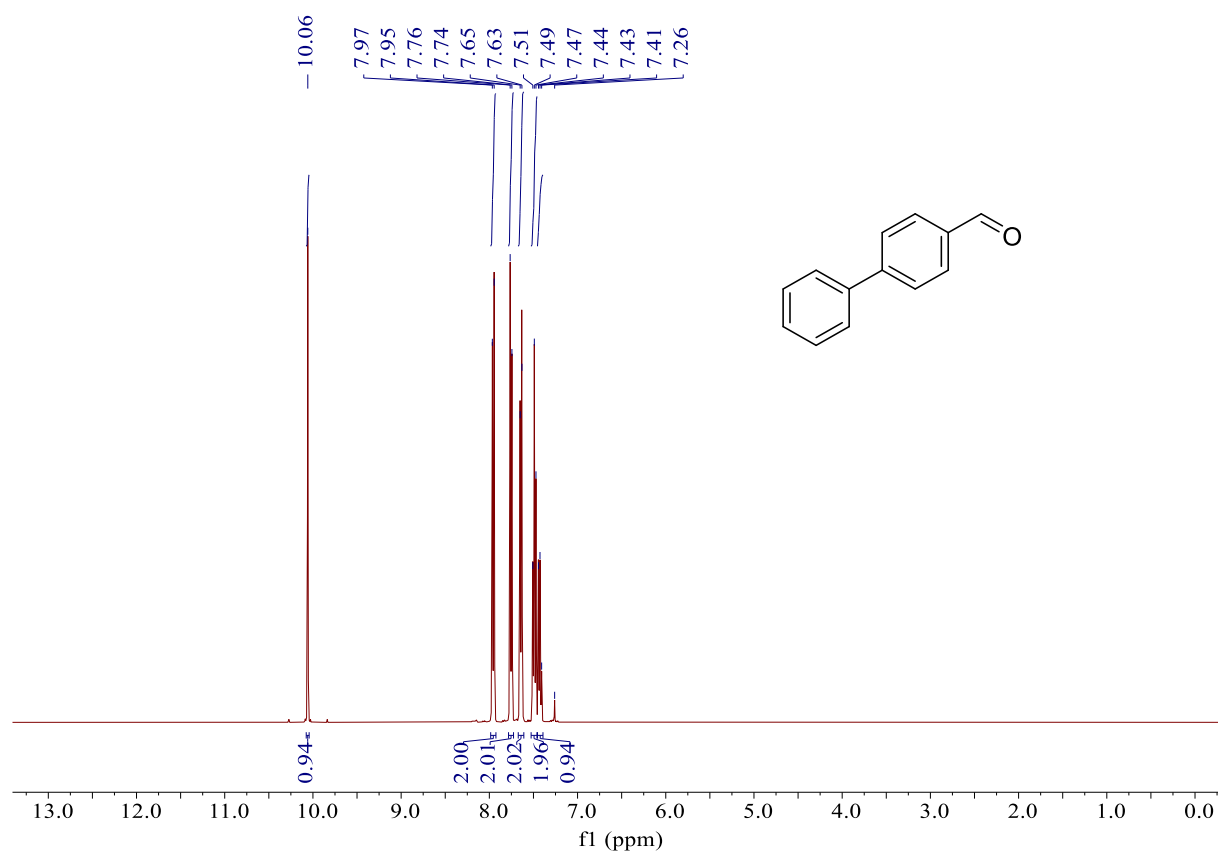

**<sup>13</sup>C NMR of compound 13f:**

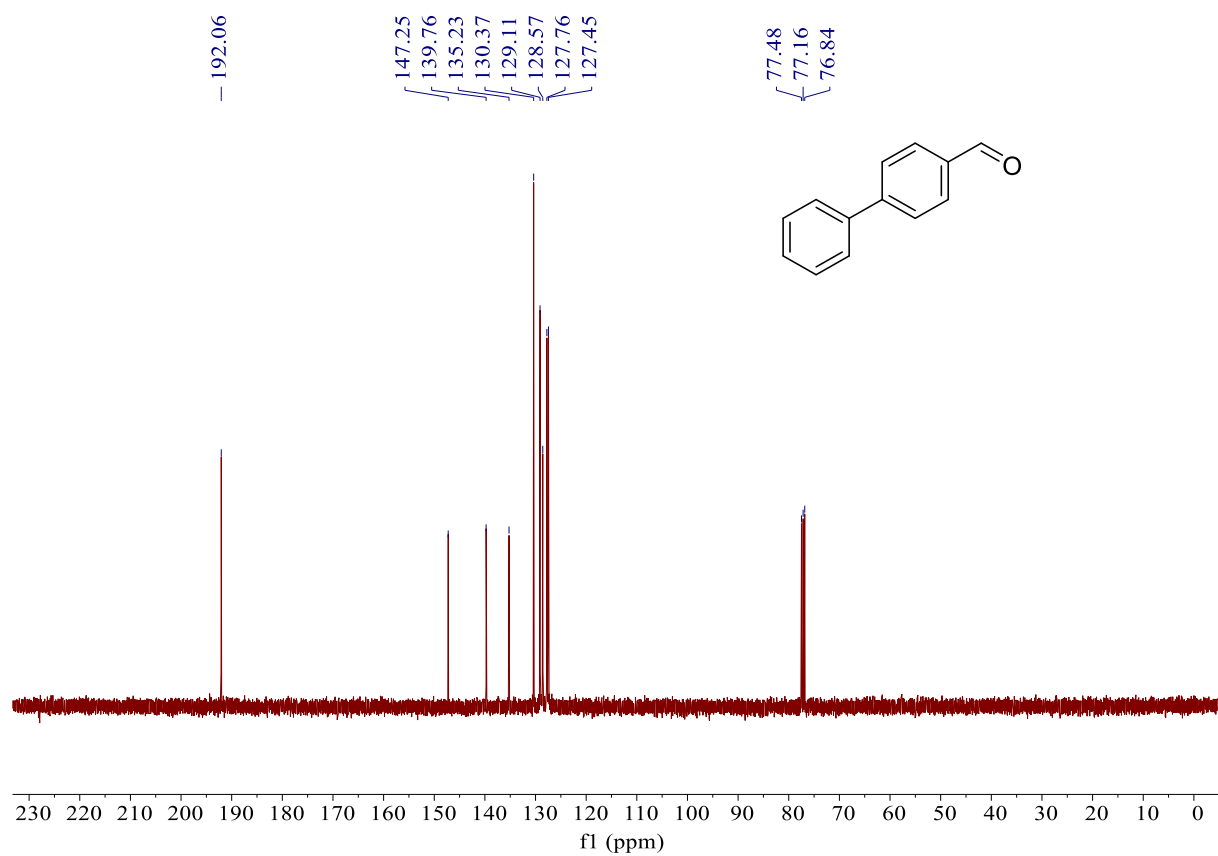



**<sup>1</sup>H NMR of compound 13g:**

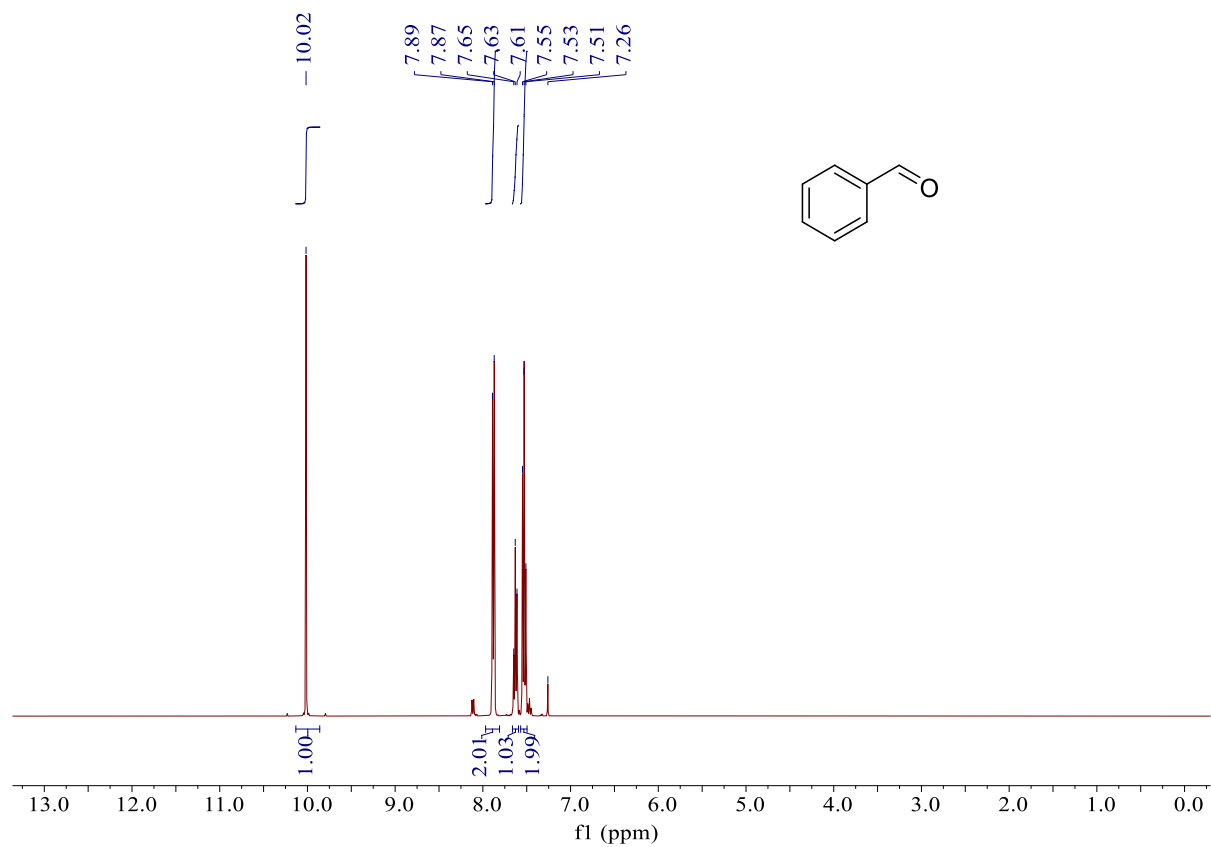

**<sup>13</sup>C NMR of compound 13g:**

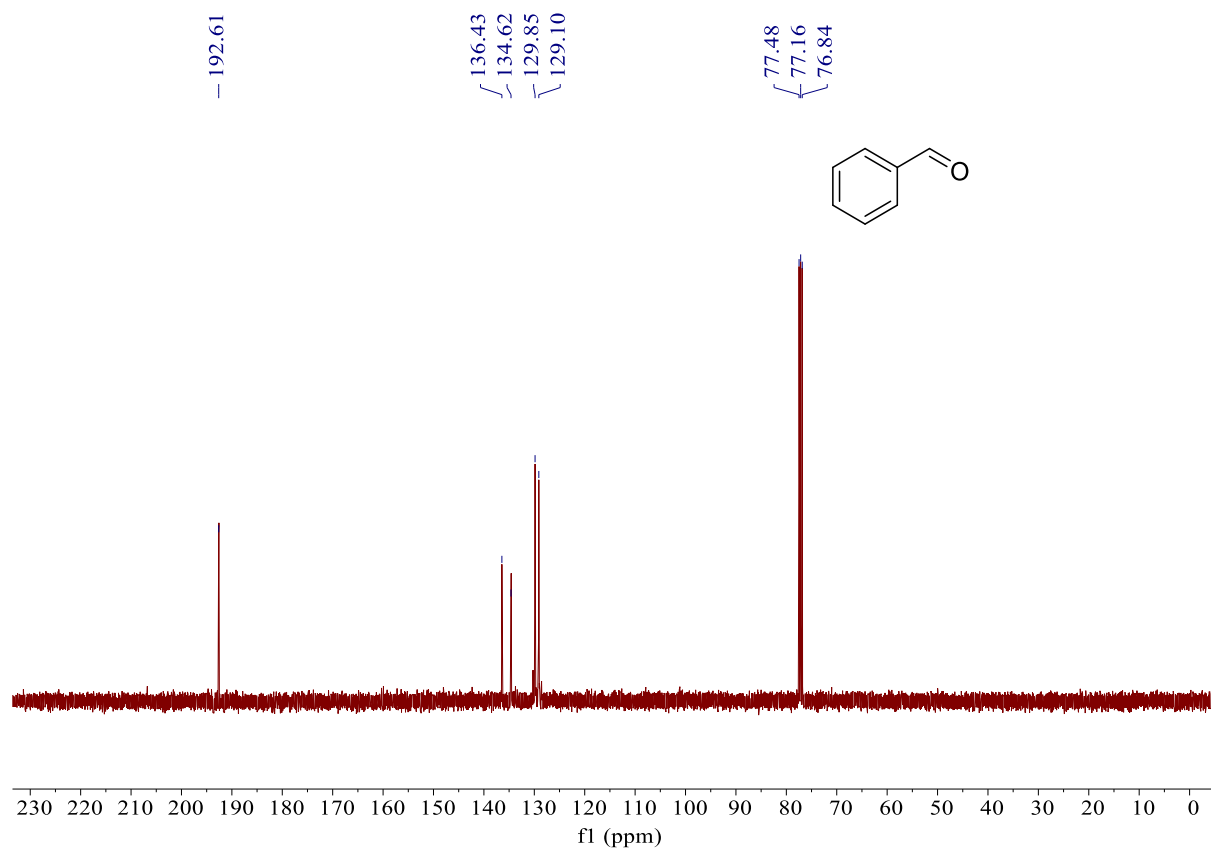

**<sup>1</sup>H NMR of compound 13h:**

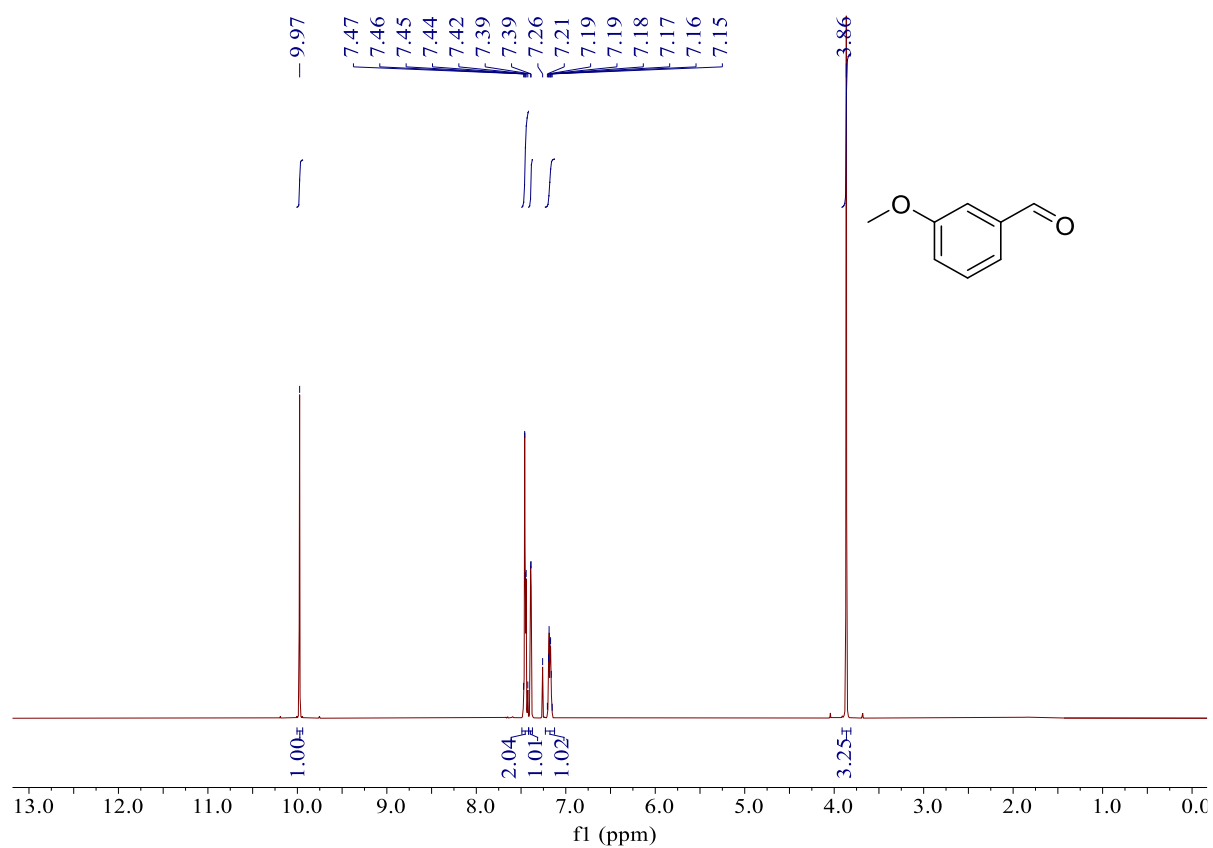

**<sup>13</sup>C NMR of compound 13h:**

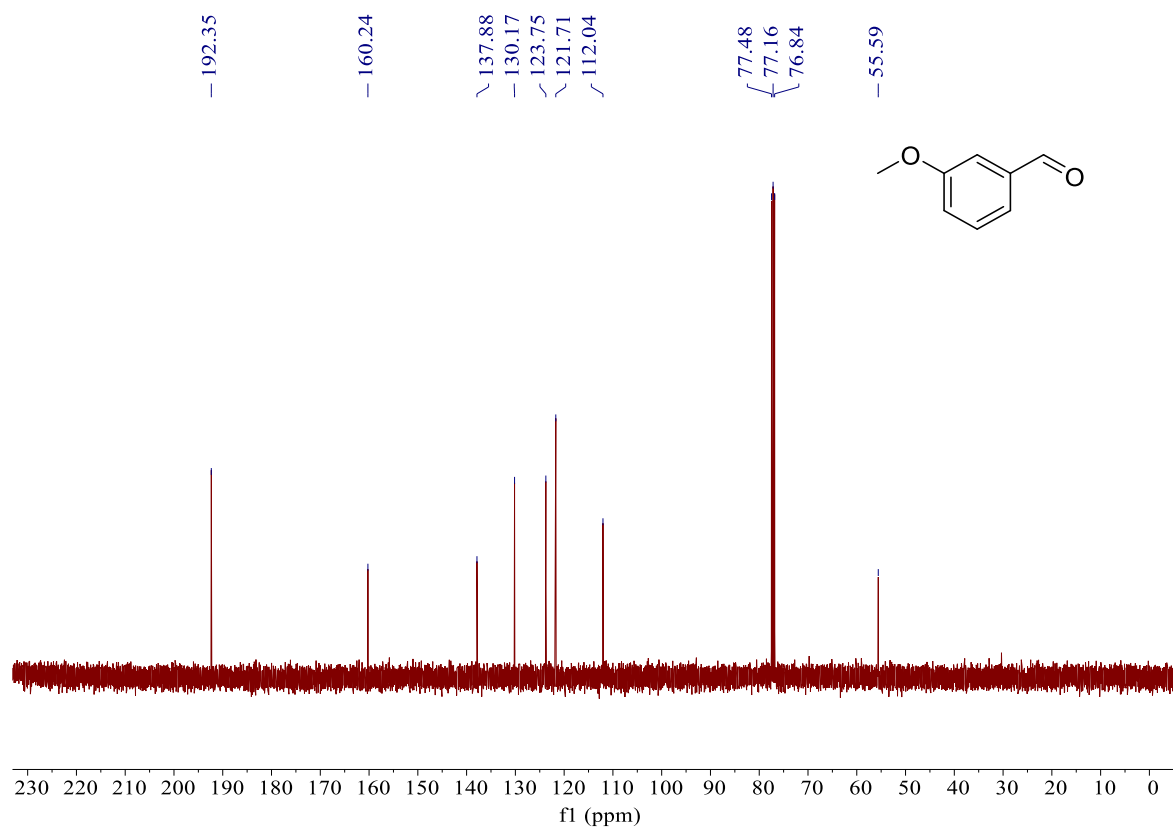

**<sup>1</sup>H NMR of compound 13i:**

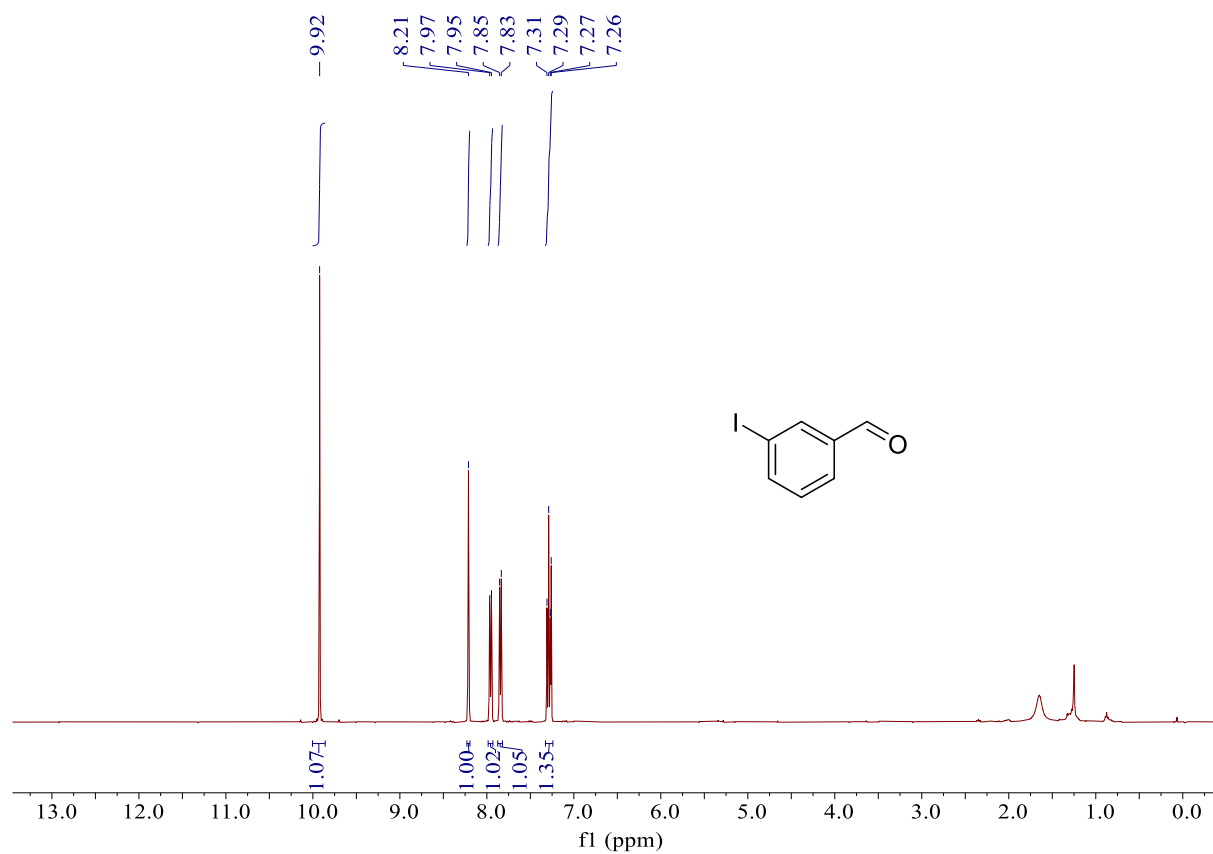

**<sup>13</sup>C NMR of compound 13i:**

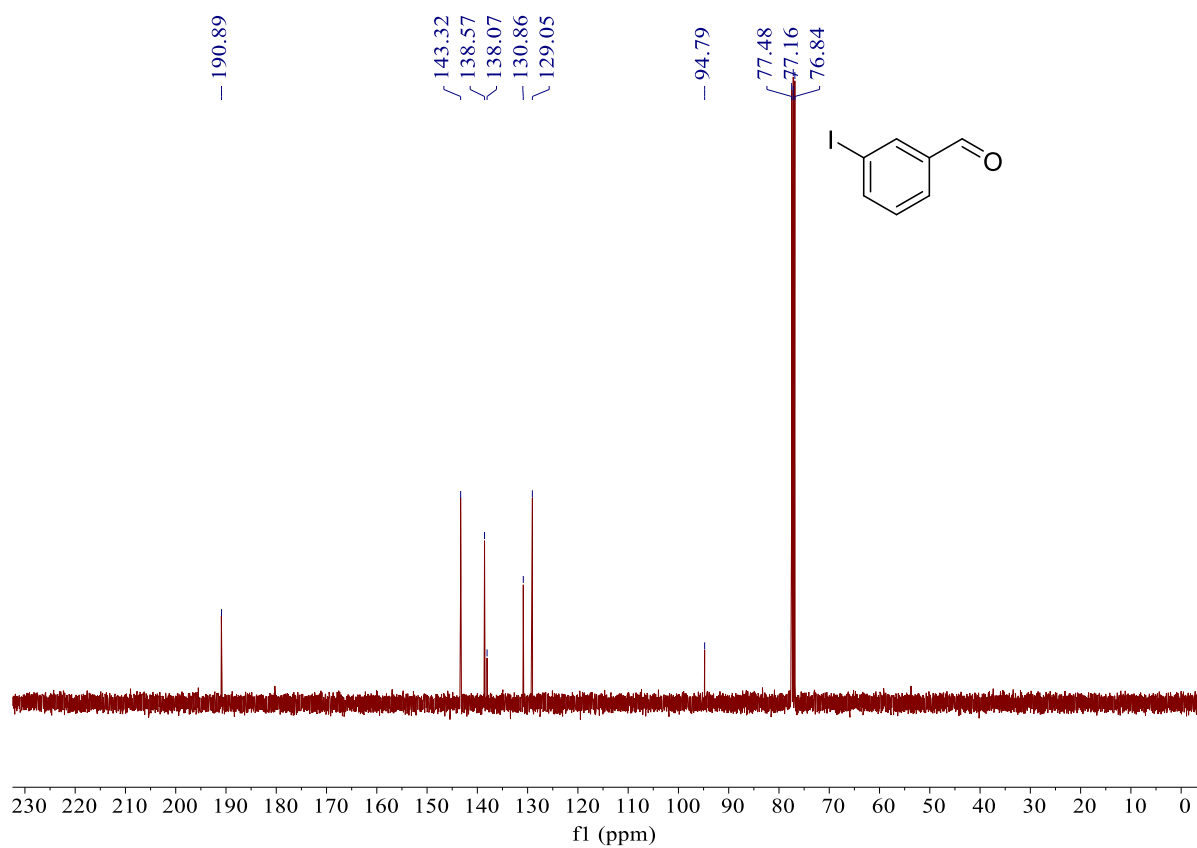

**<sup>1</sup>H NMR of compound 13j:**

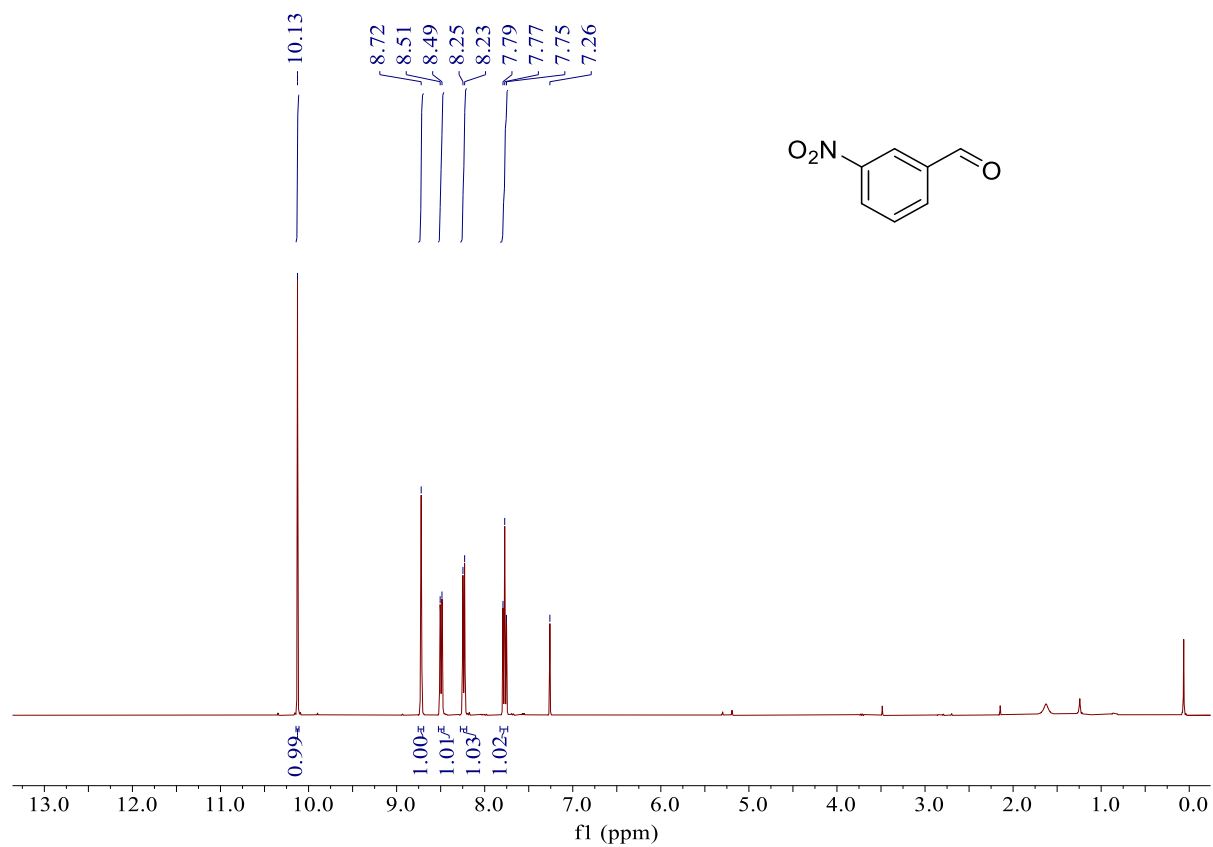

**<sup>13</sup>C NMR of compound 13j:**

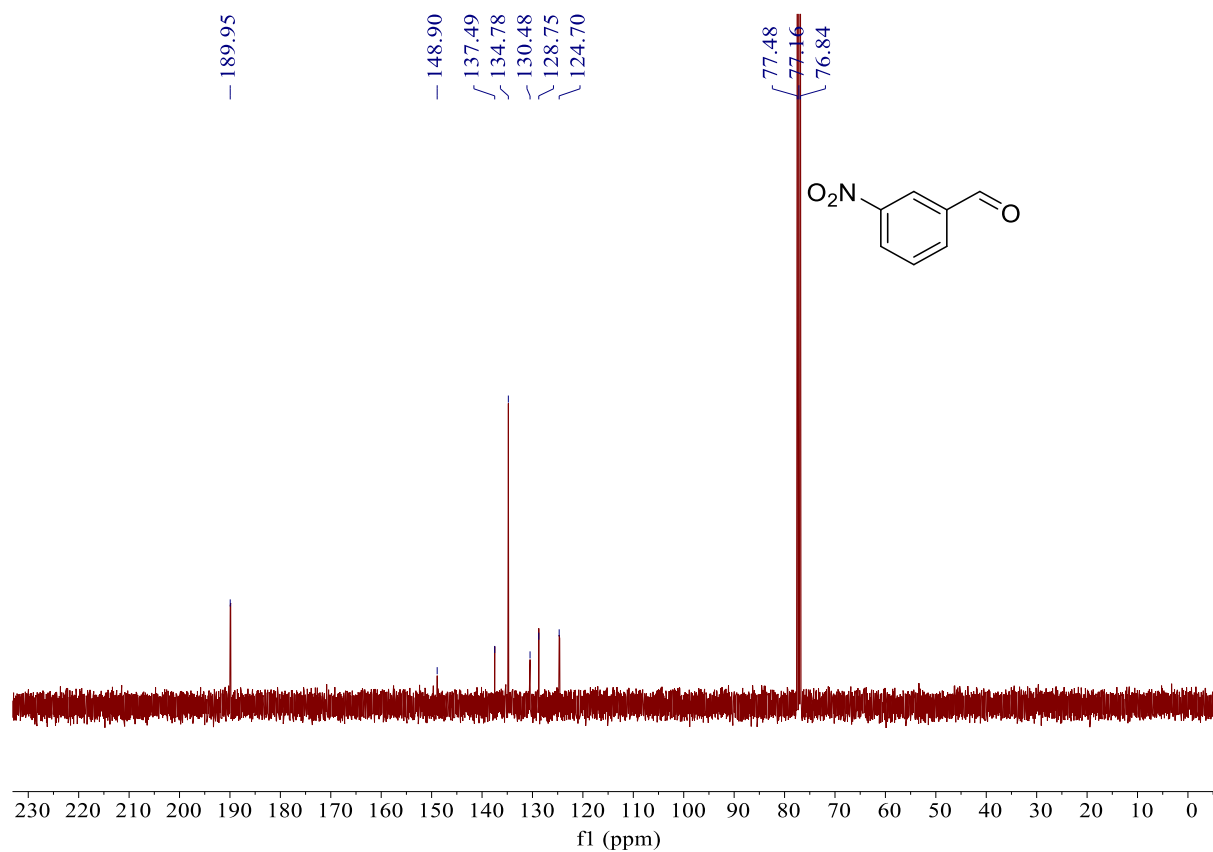

**<sup>1</sup>H NMR of compound 13k:**

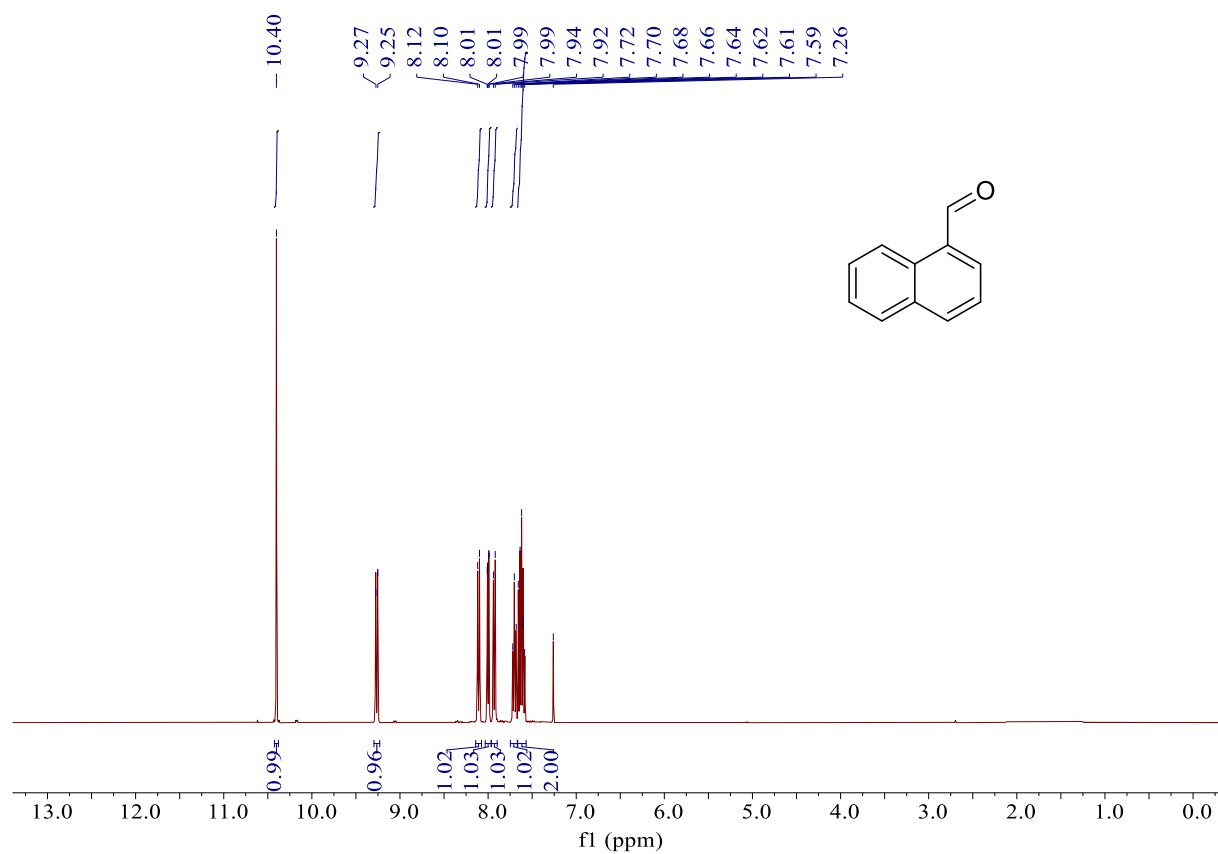

**<sup>13</sup>C NMR of compound 13k:**

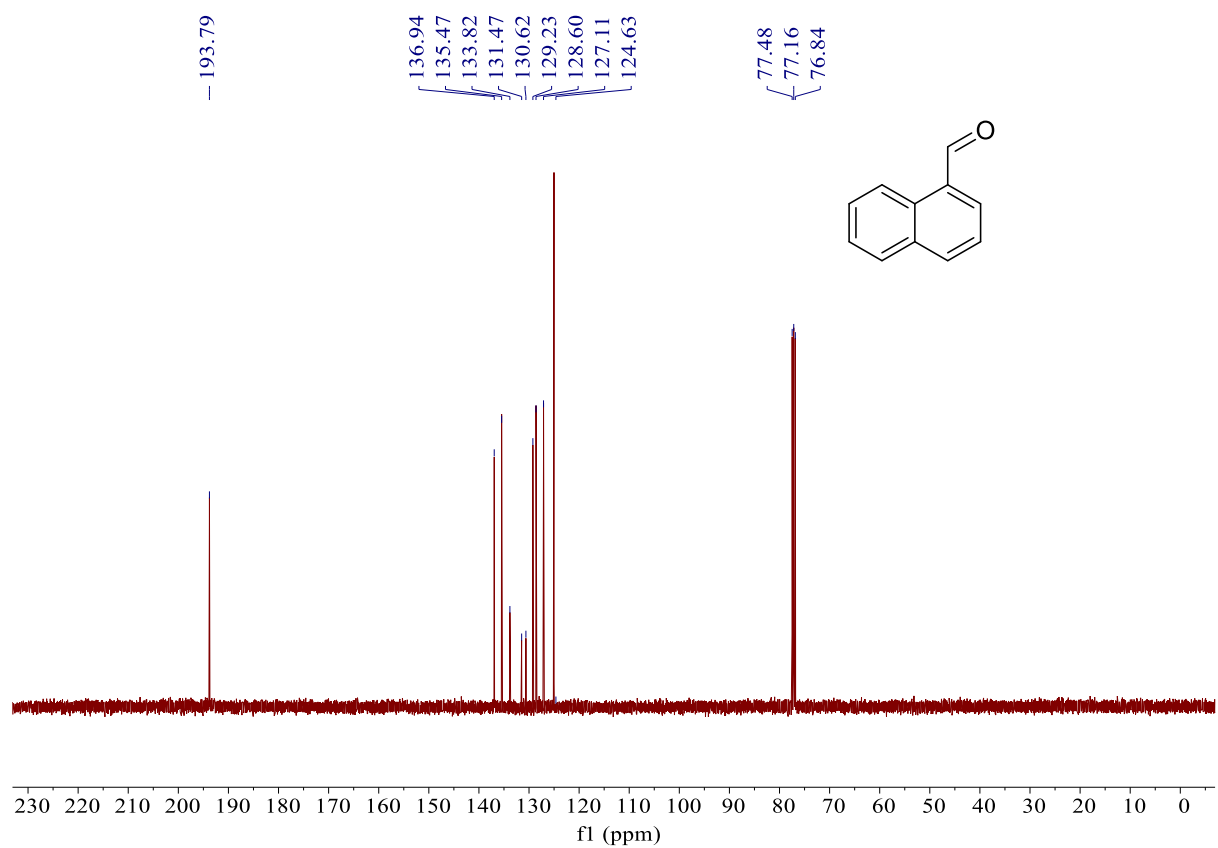

**<sup>1</sup>H NMR of compound 13l:**

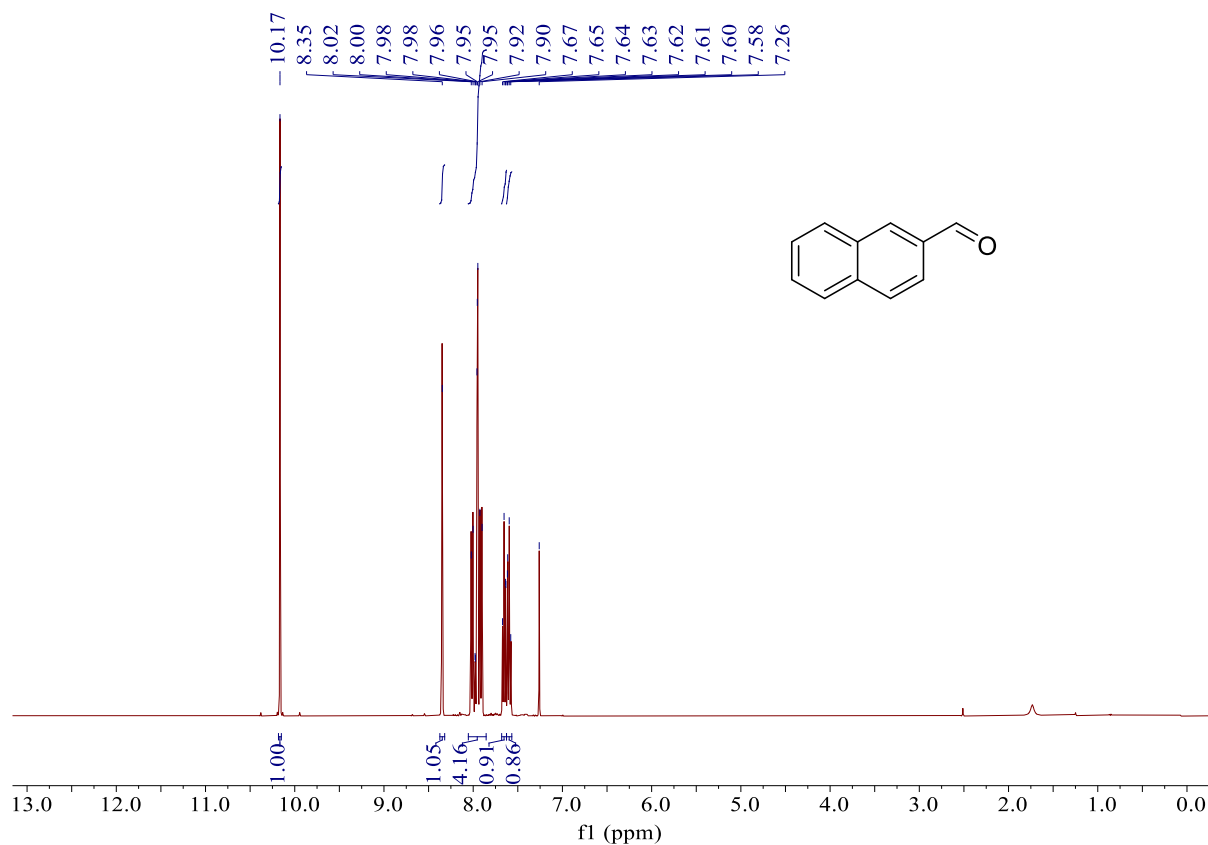

**<sup>13</sup>C NMR of compound 13l:**

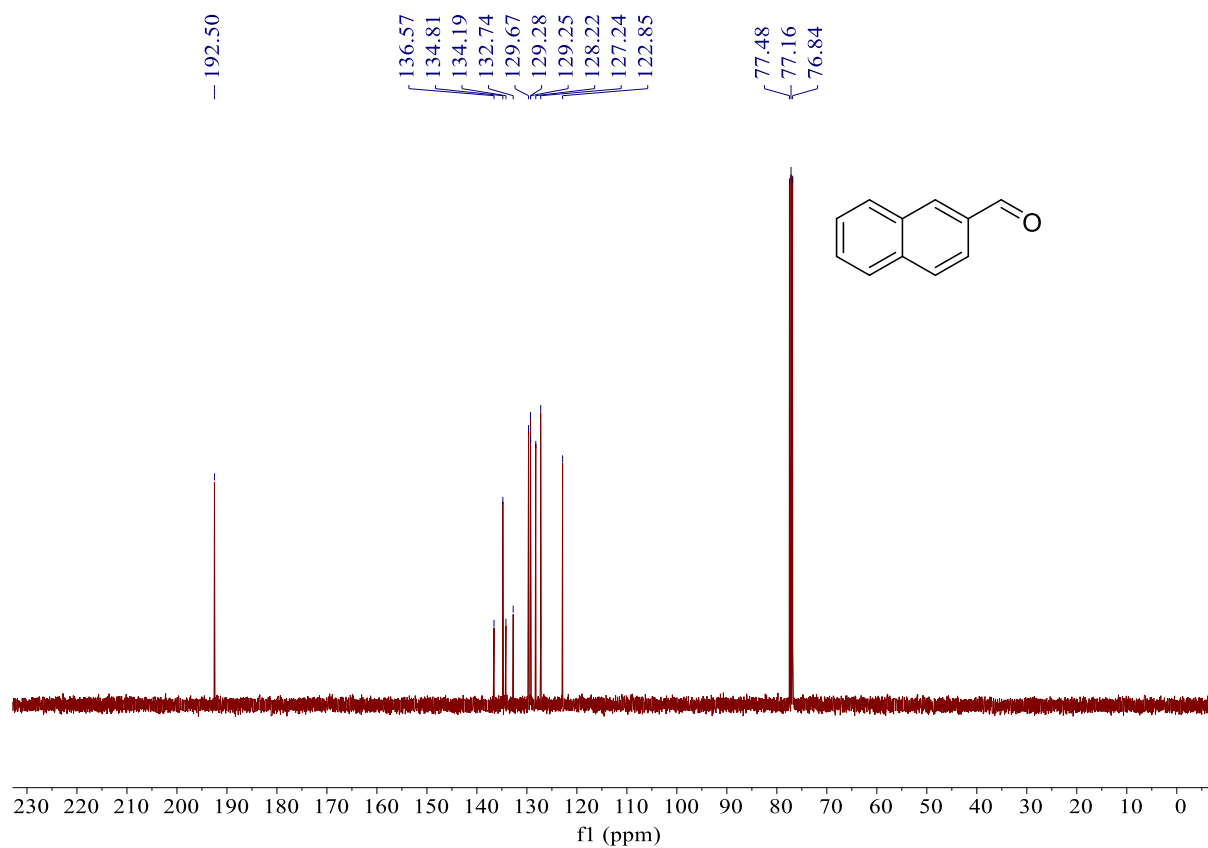

**<sup>1</sup>H NMR of compound 13m:**

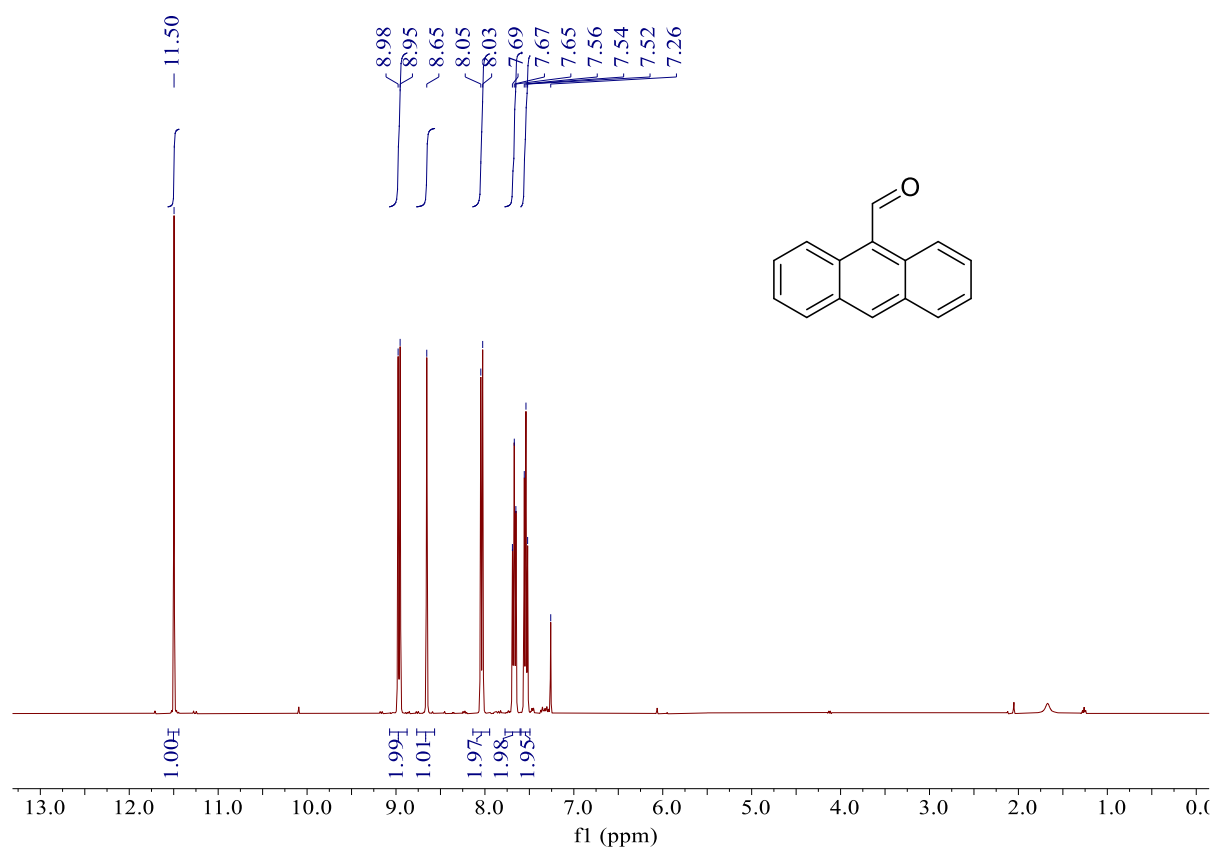

**<sup>13</sup>C NMR of compound 13m:**

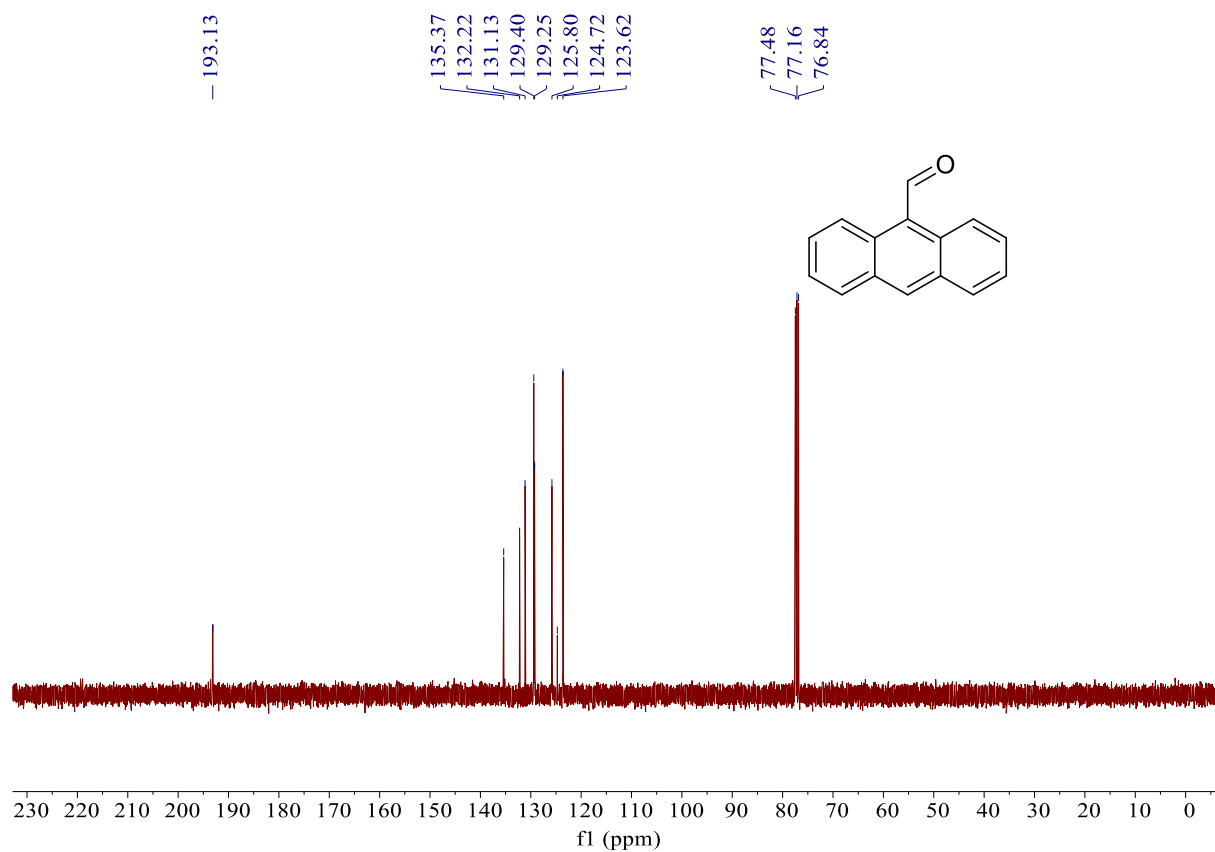

**<sup>1</sup>H NMR of compound 16a:**

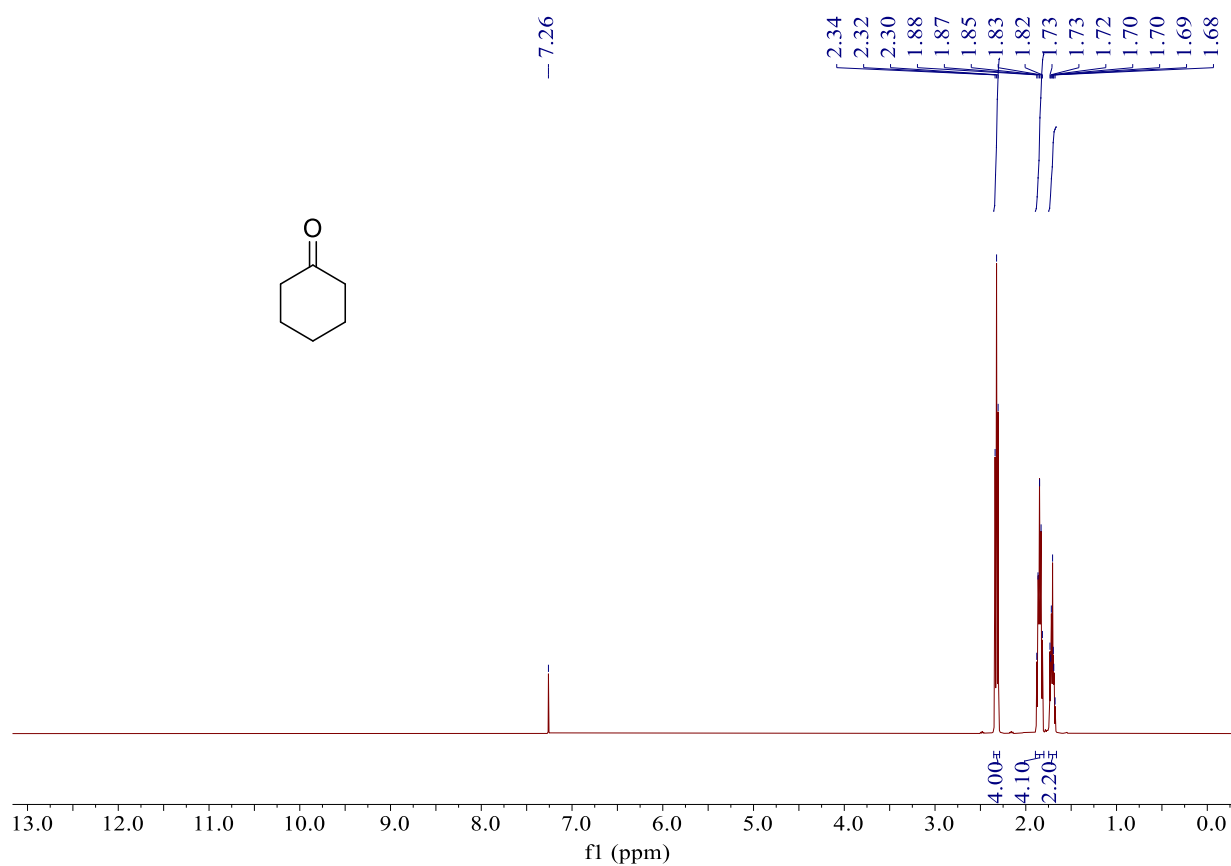

**<sup>13</sup>C NMR of compound 16a:**

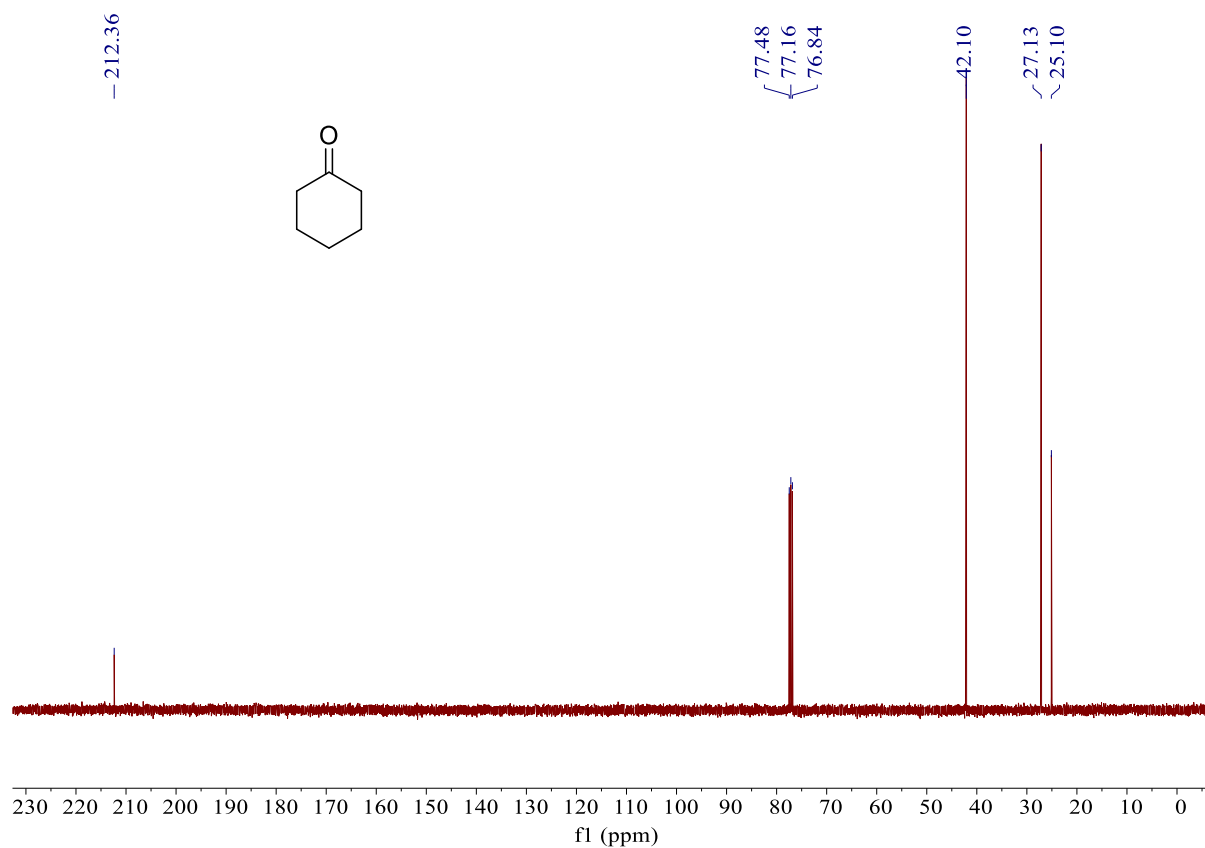



**<sup>1</sup>H NMR of compound 16b:**

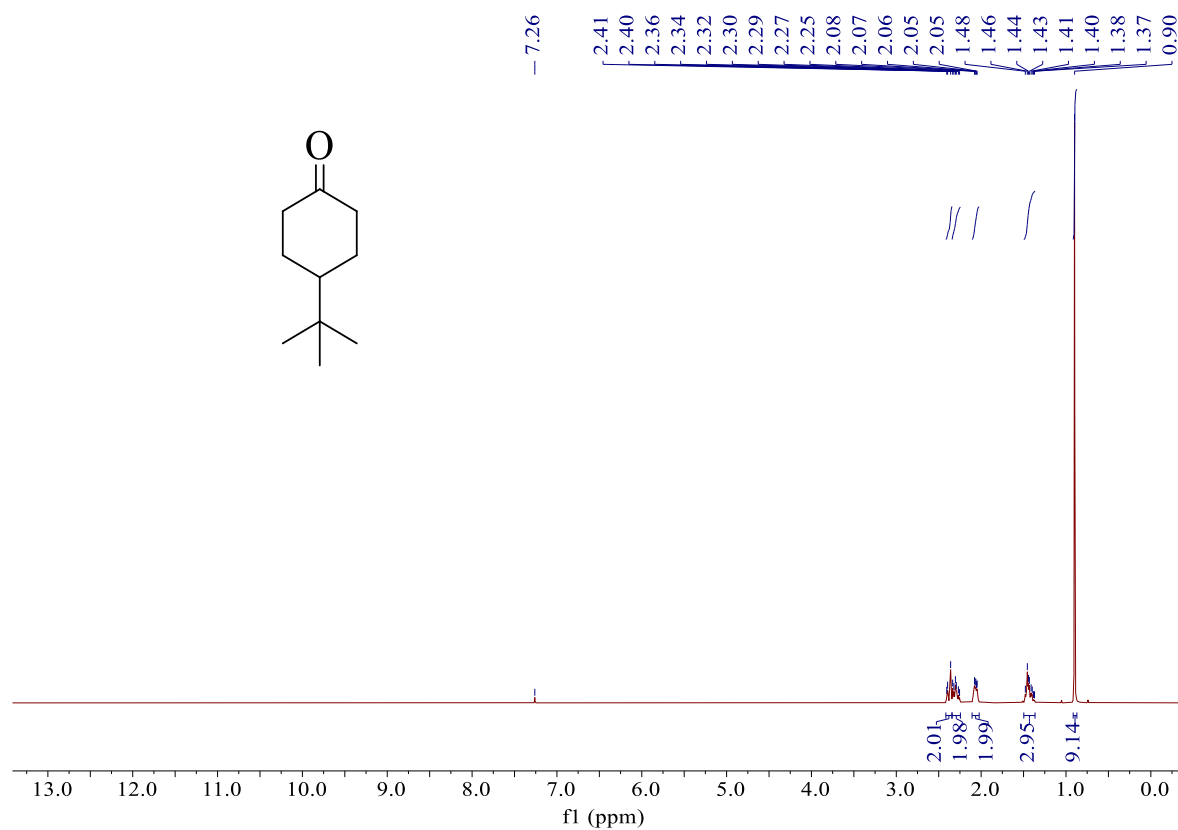

**<sup>13</sup>C NMR of compound 16b:**

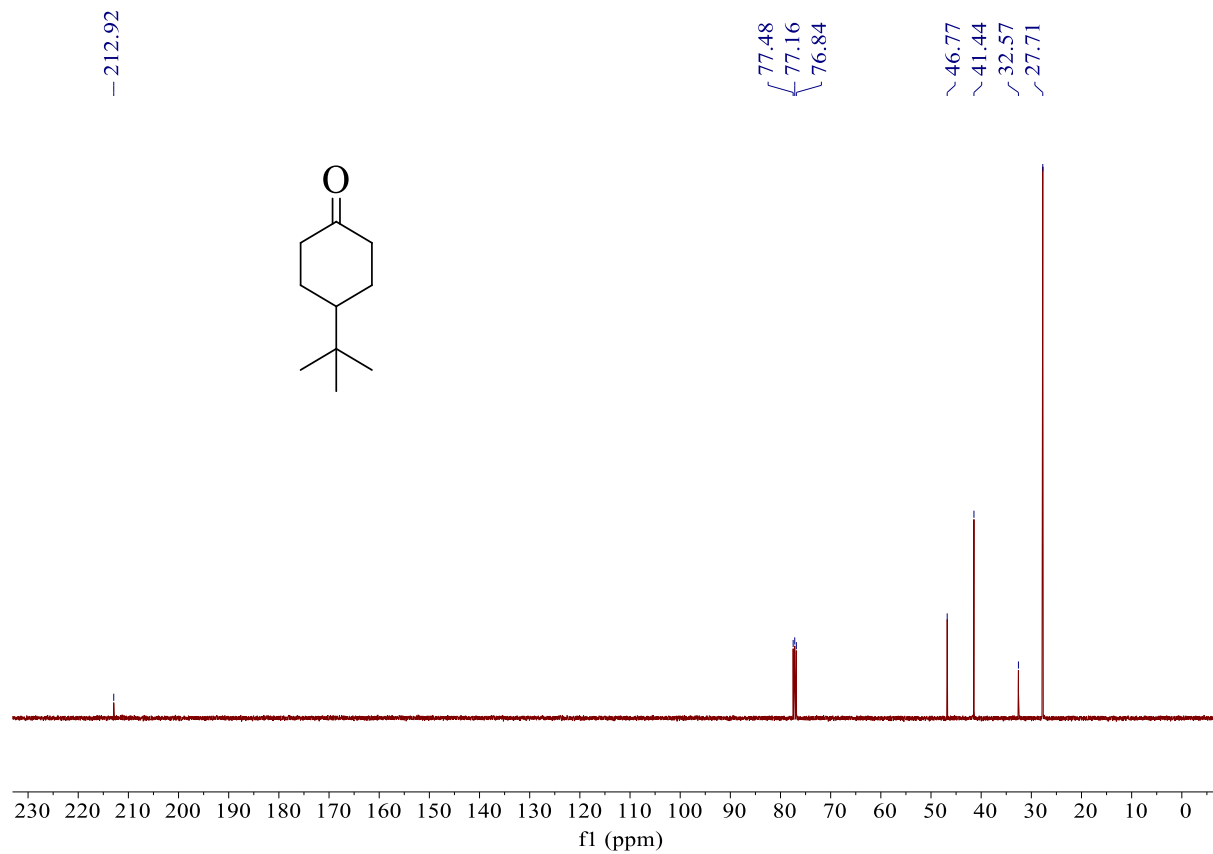

**<sup>1</sup>H NMR of compound 16c:**

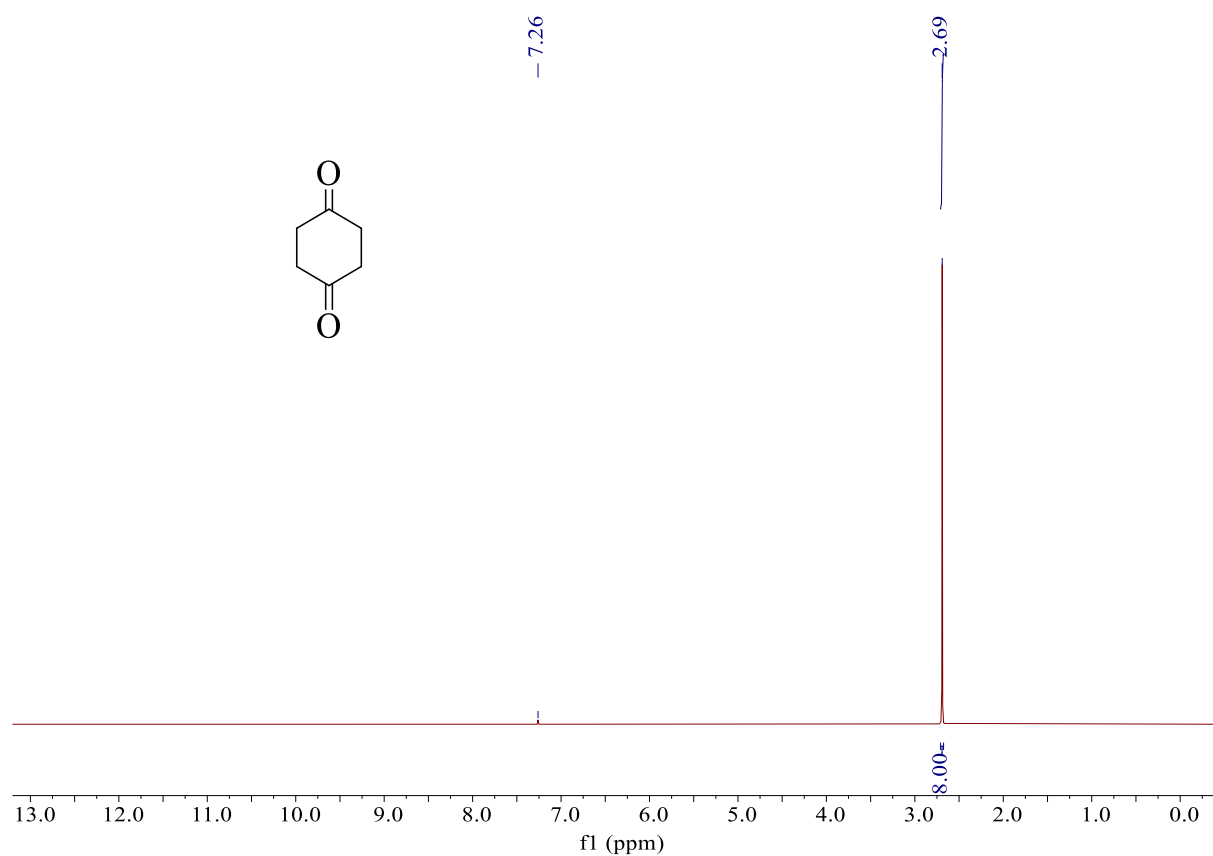

**<sup>13</sup>C NMR of compound 16c:**

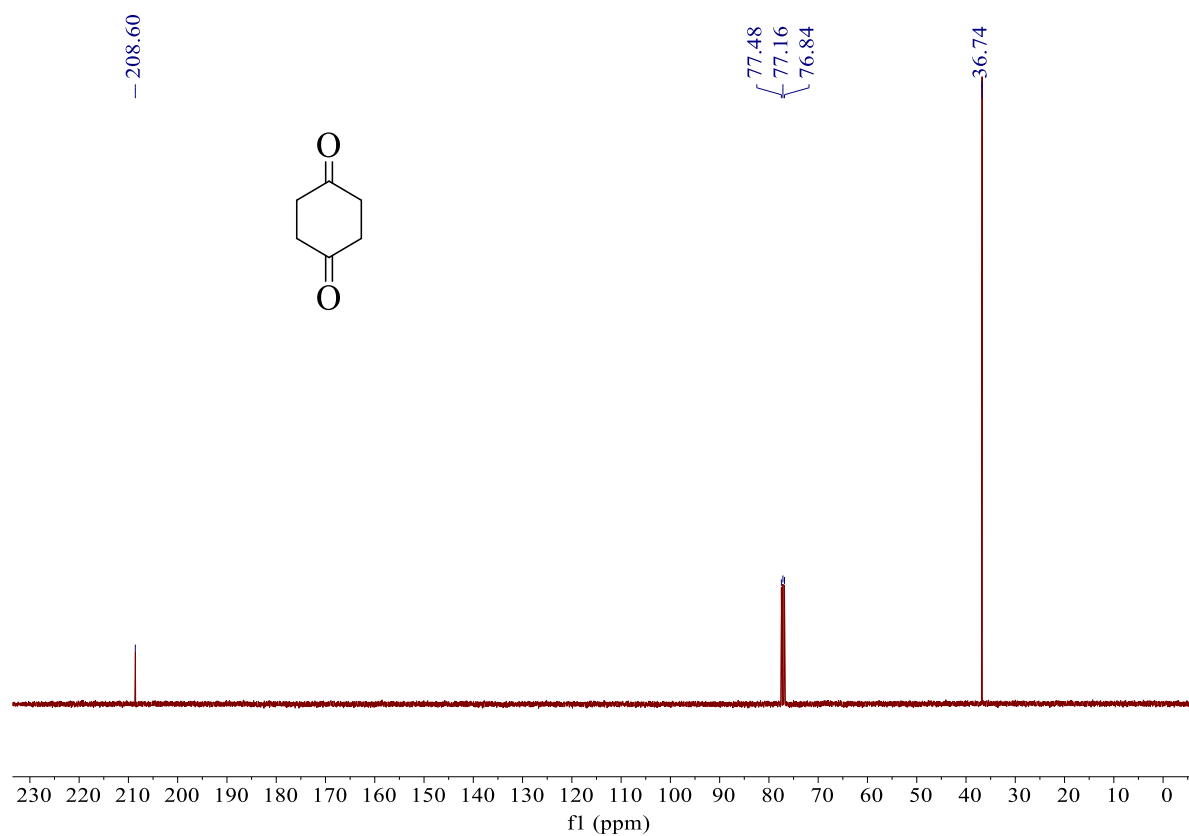

**<sup>1</sup>H NMR of compound 16d:**

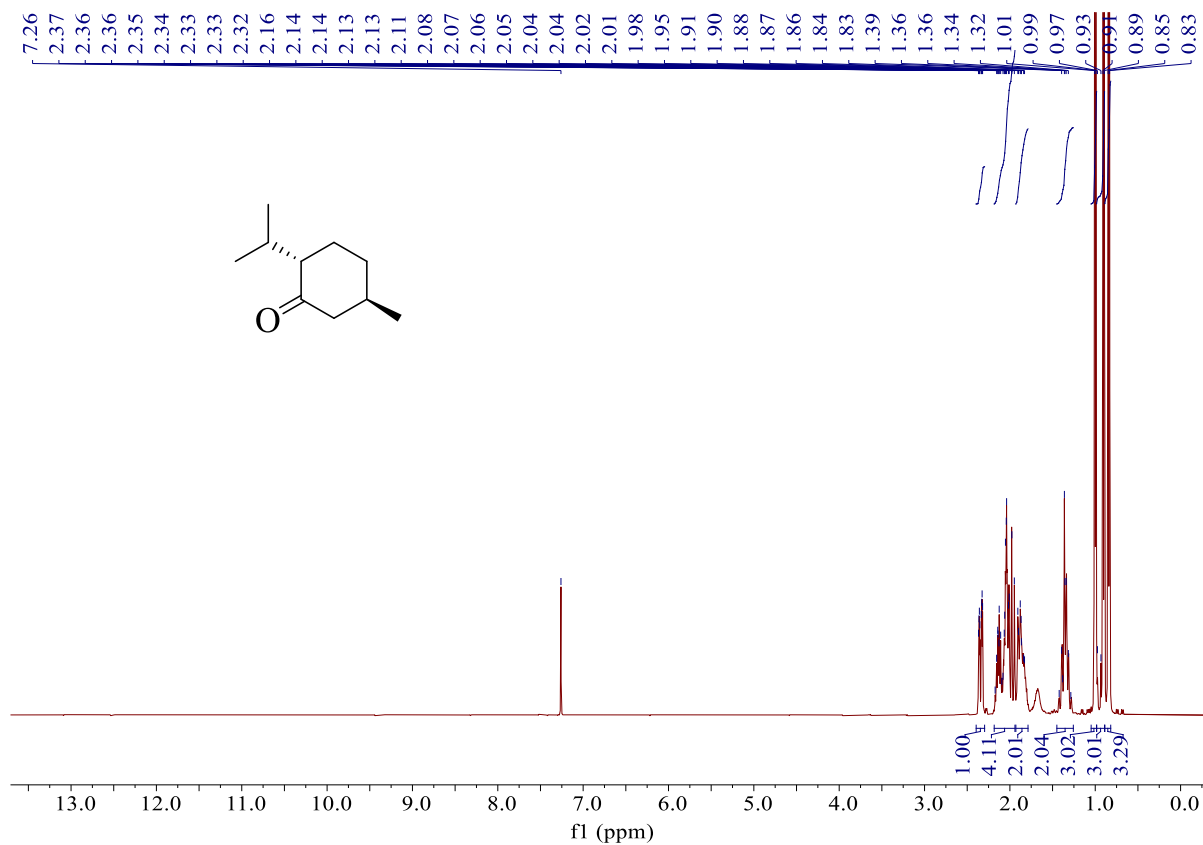

**<sup>13</sup>C NMR of compound 16d:**

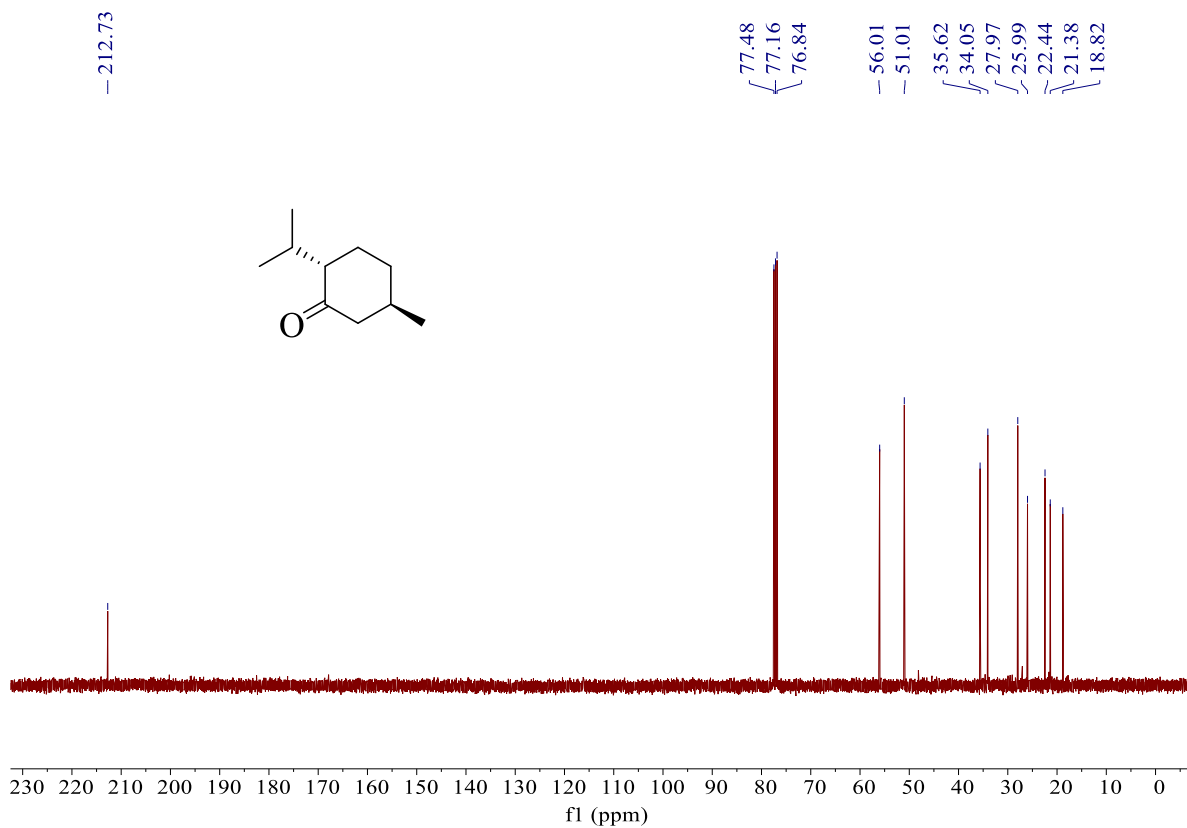

**<sup>1</sup>H NMR of compound 16e:**

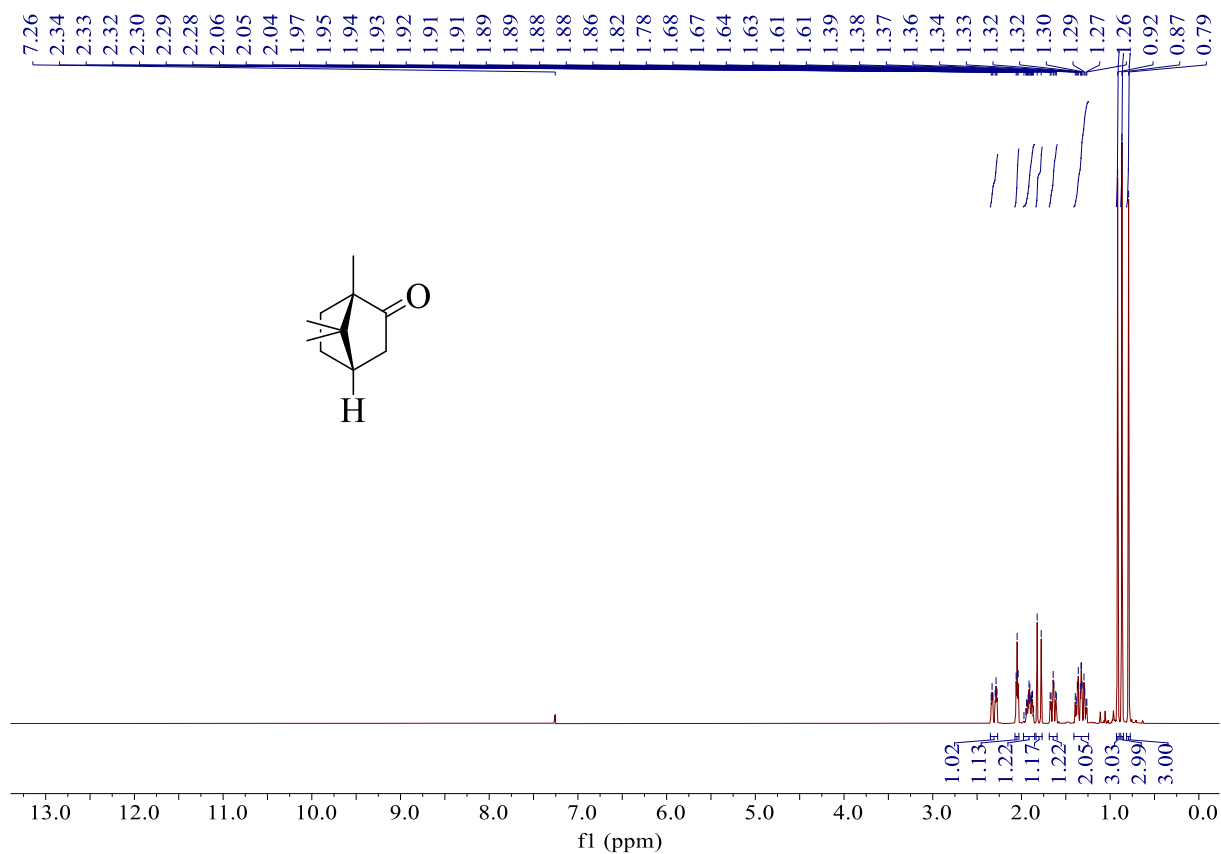

**<sup>13</sup>C NMR of compound 16e:**

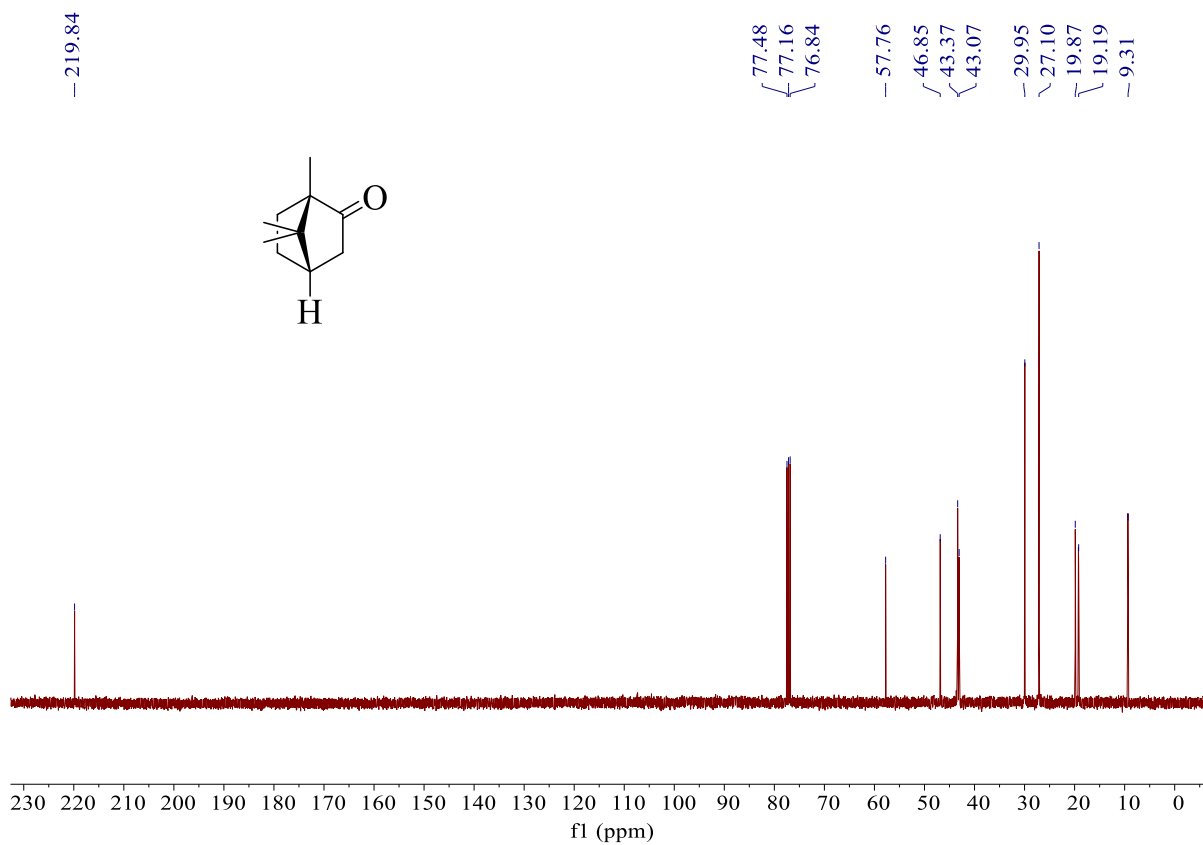

**<sup>1</sup>H NMR of compound 16f:**

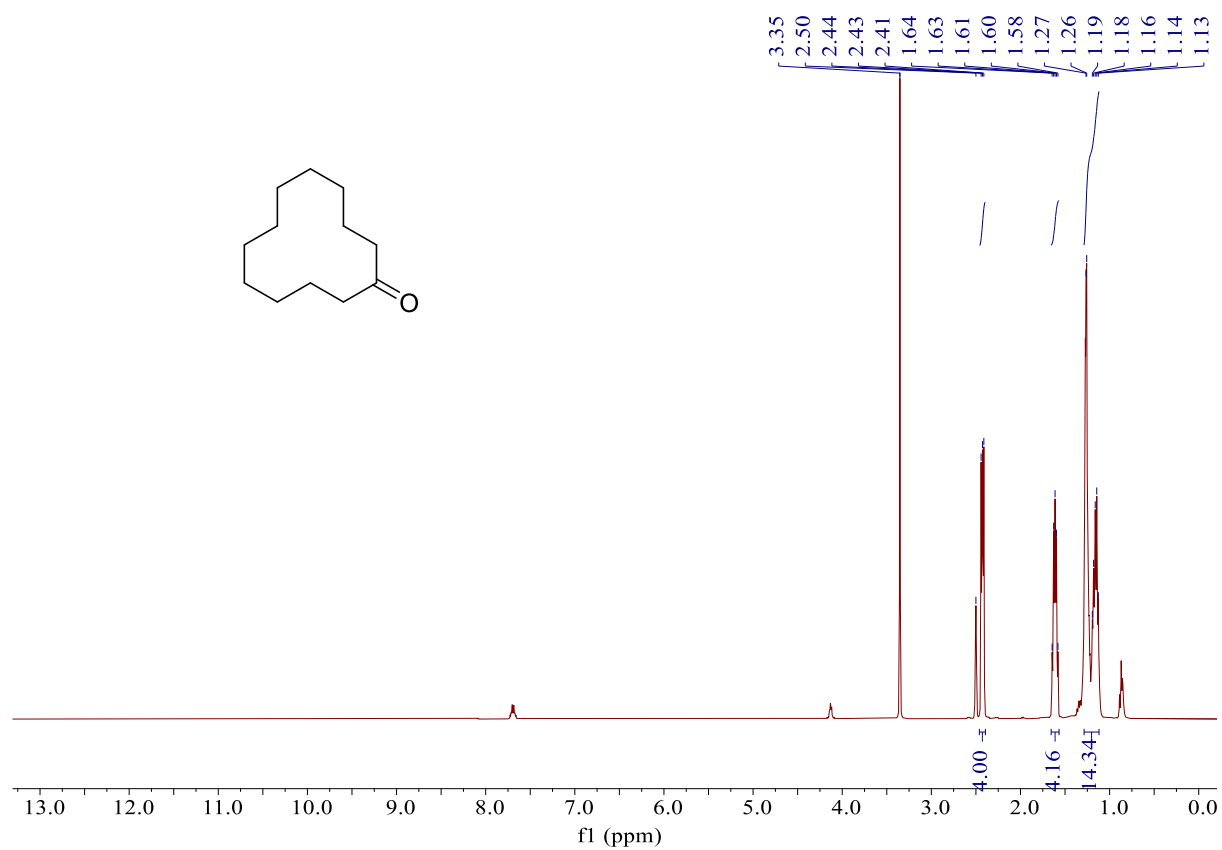

**<sup>13</sup>C NMR of compound 16f**

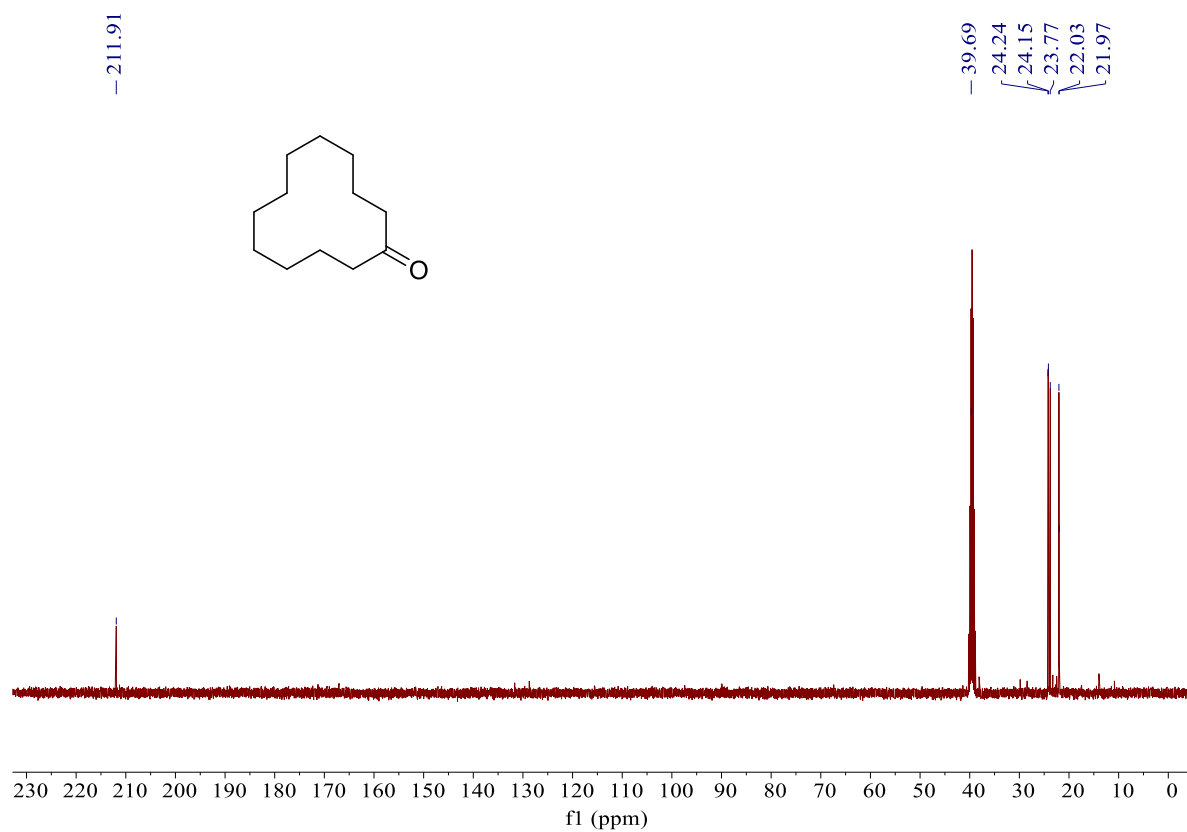

**<sup>1</sup>H NMR of compound 16g:**

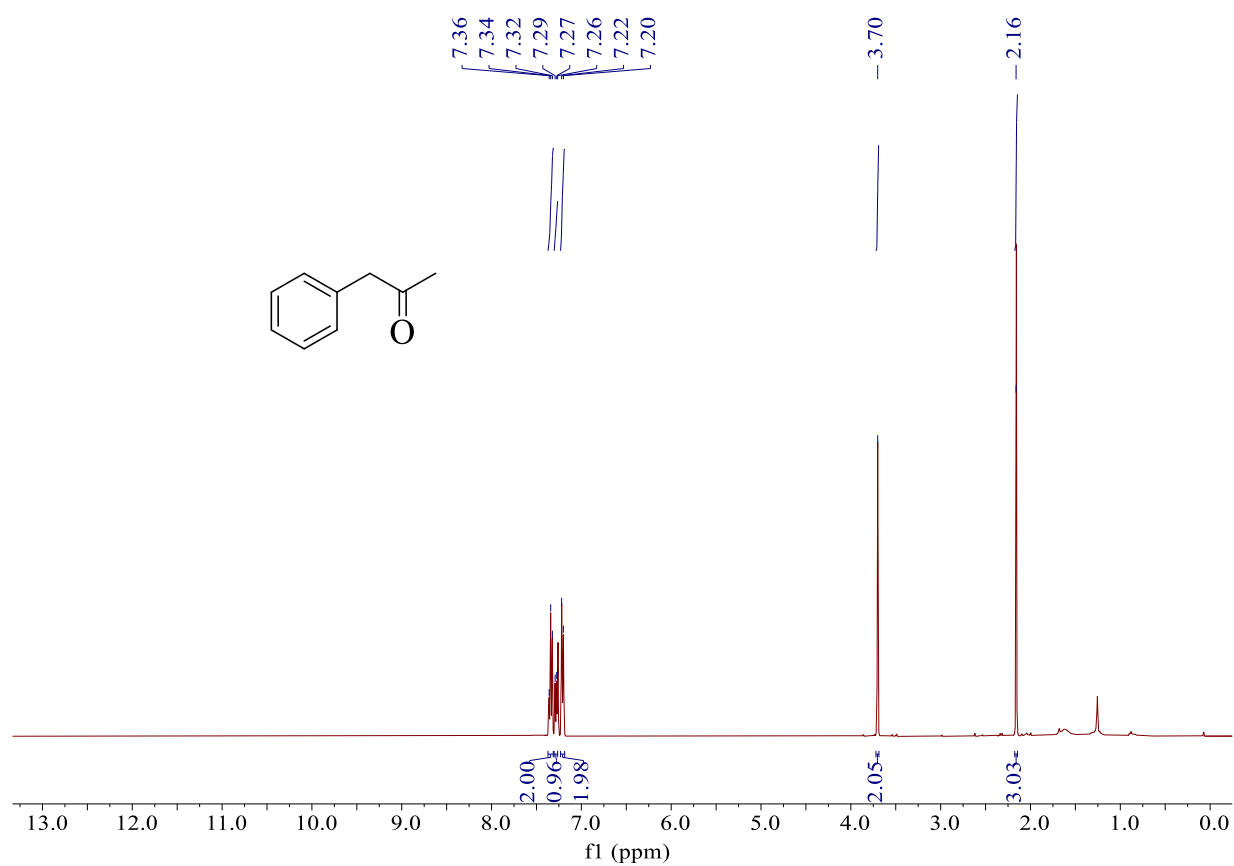

**<sup>13</sup>C NMR of compound 16g:**

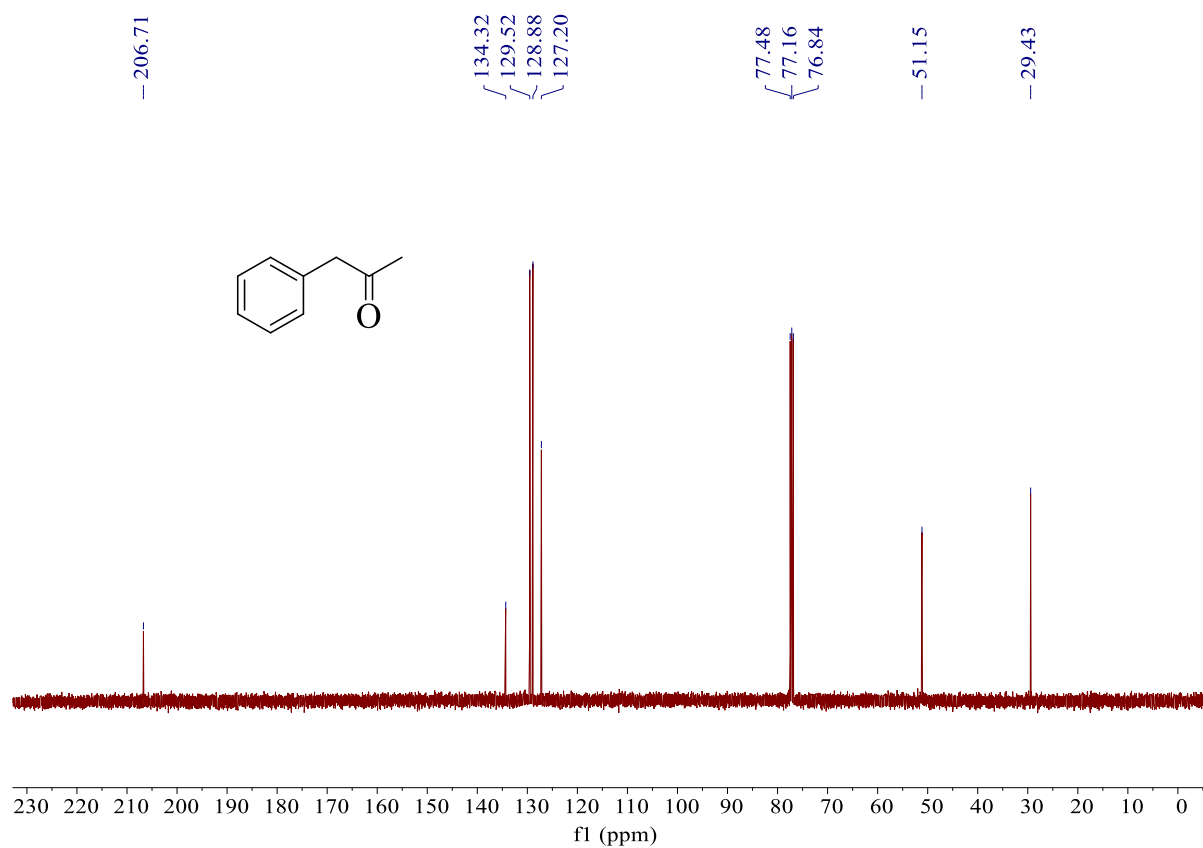

**<sup>1</sup>H NMR of compound 16h:**

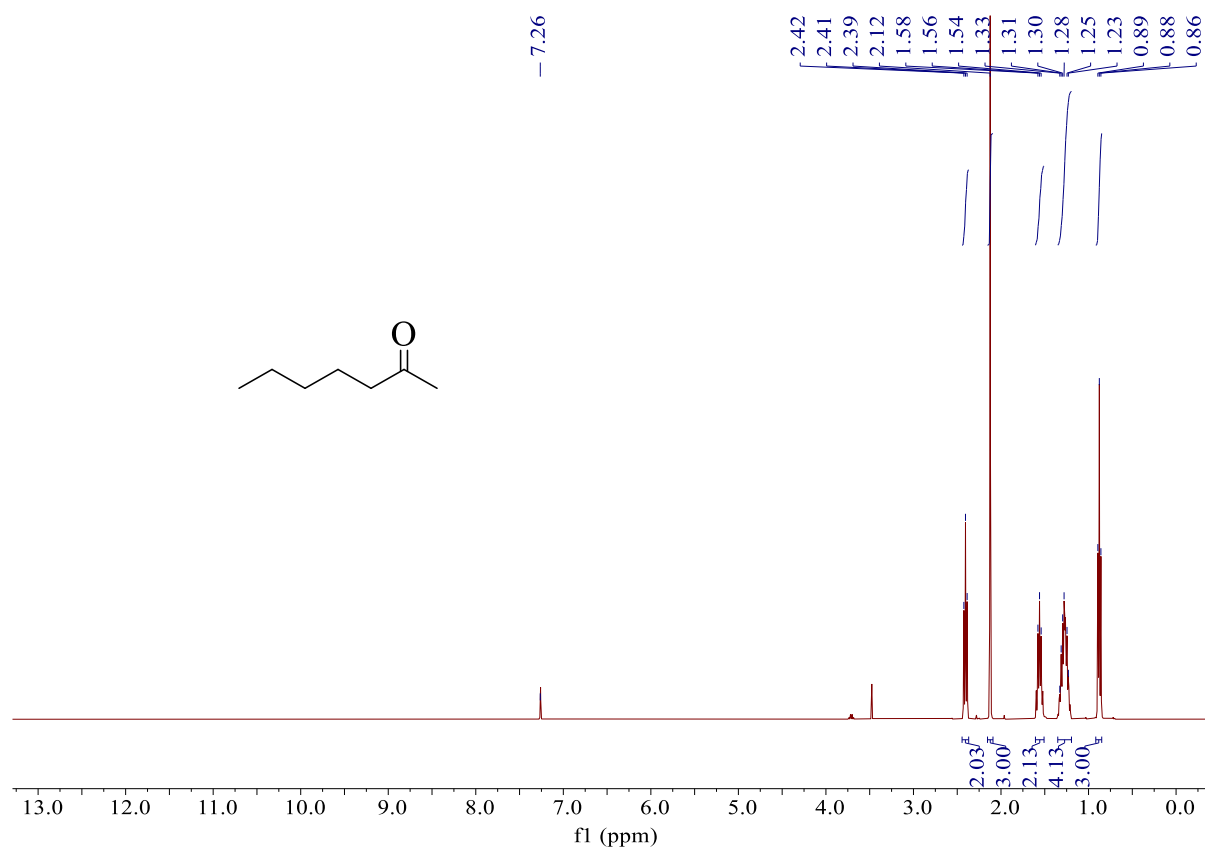

**<sup>13</sup>C NMR of compound 16h:**

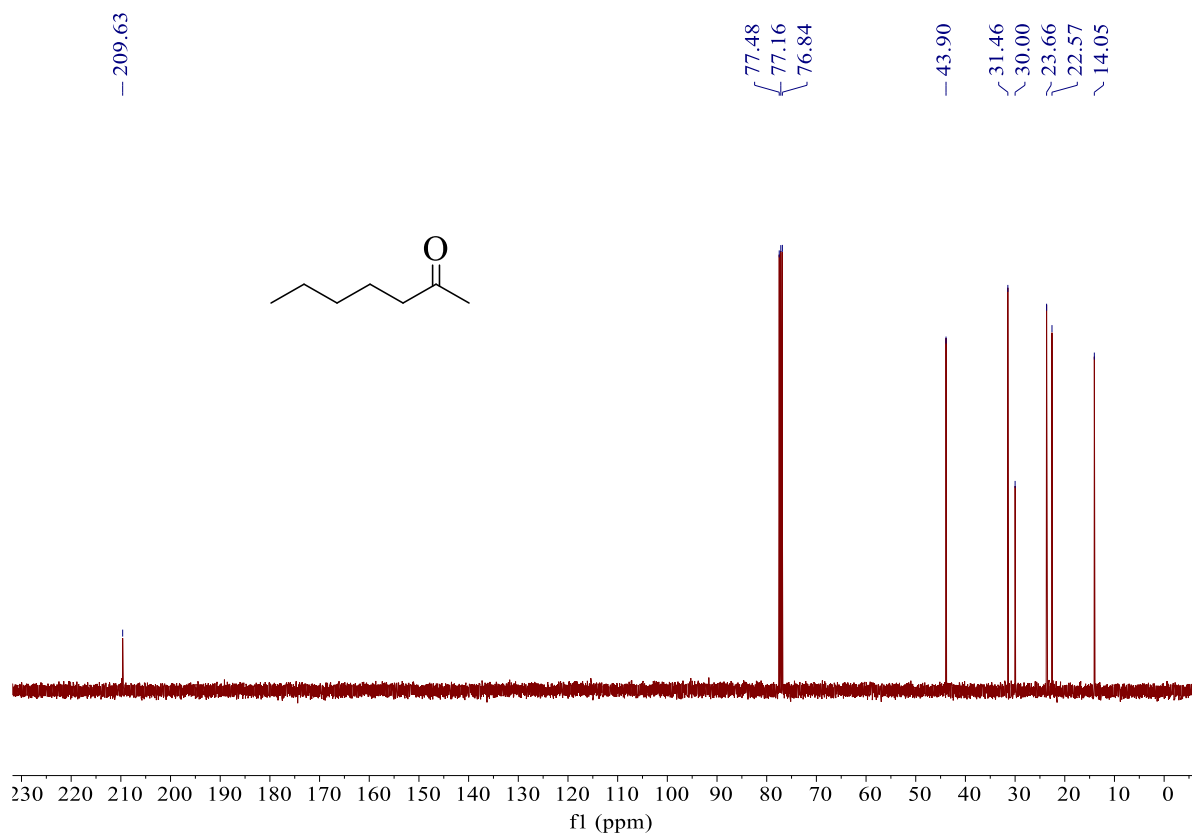

**<sup>1</sup>H NMR of compound 16i:**

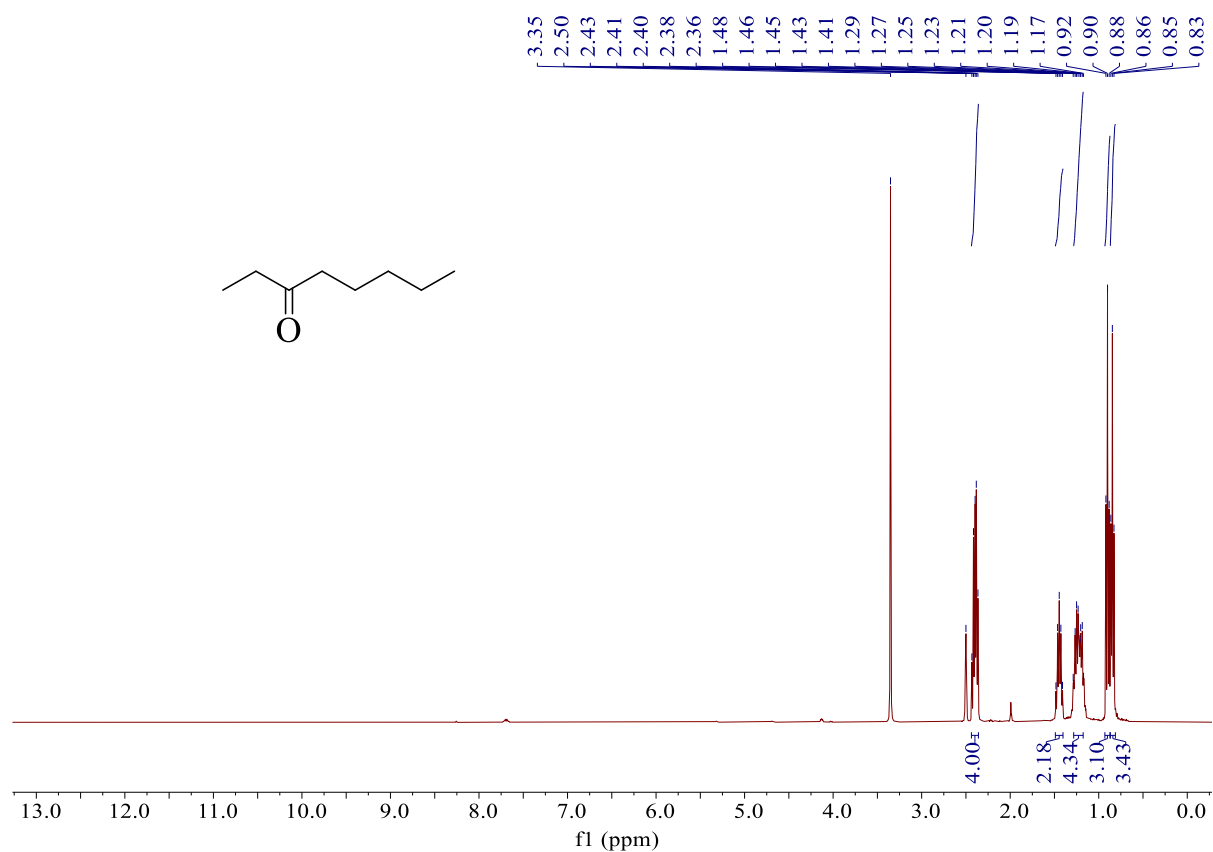

**<sup>13</sup>C NMR of compound 16i:**

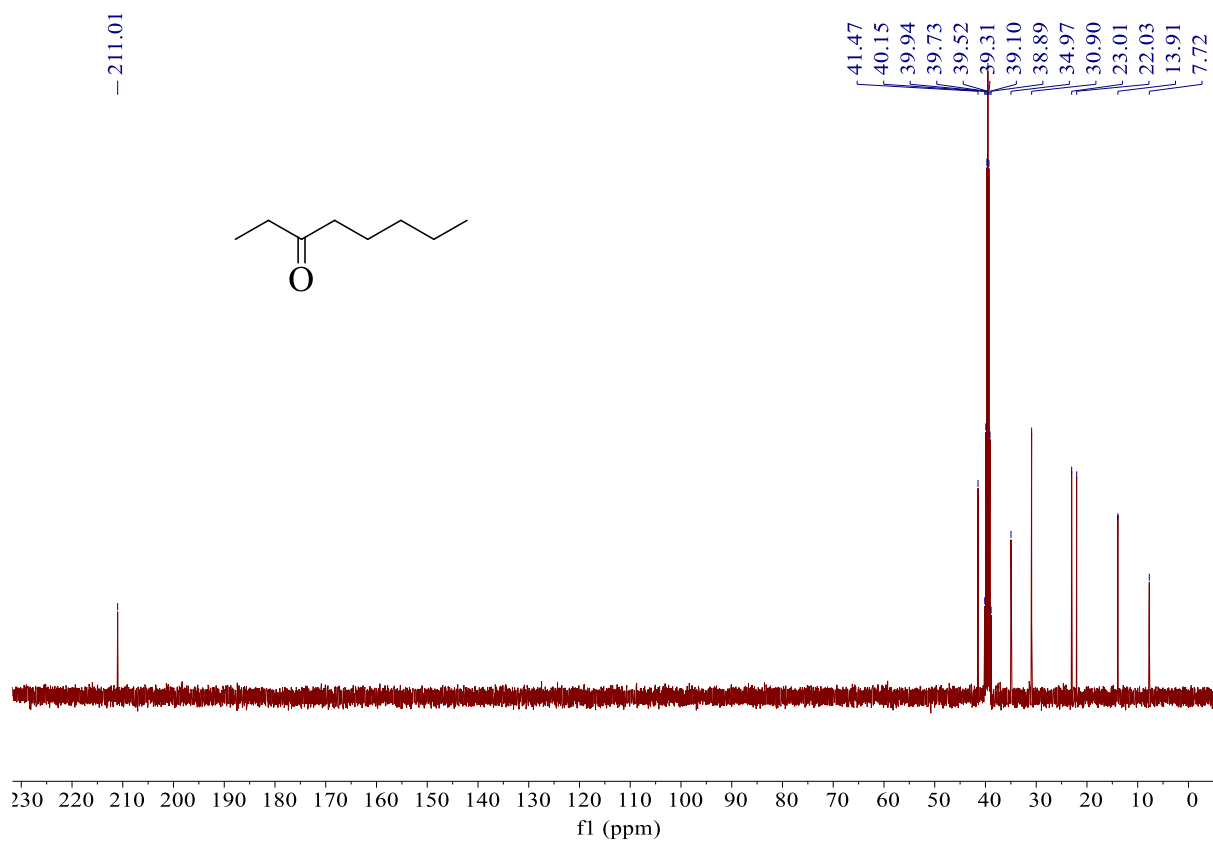



**<sup>1</sup>H NMR of compound 16j:**

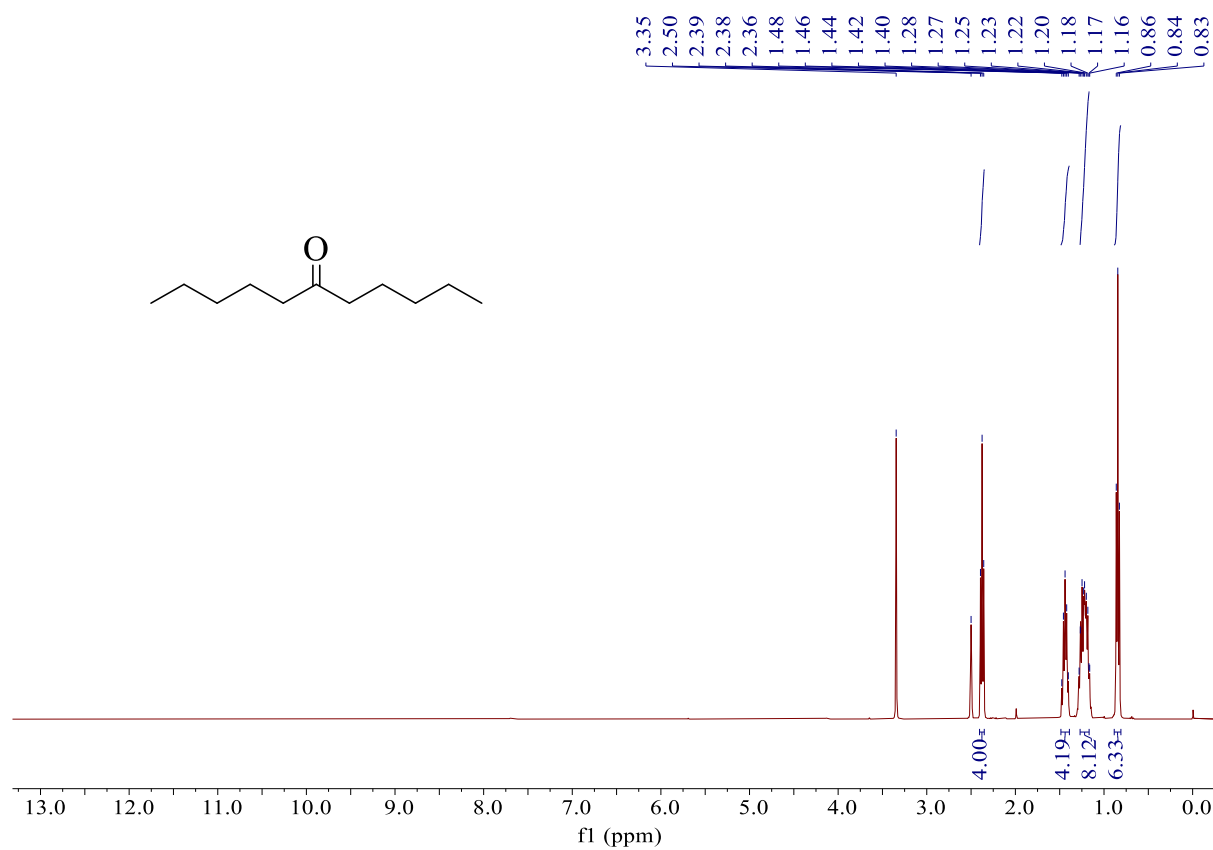

**<sup>13</sup>C NMR of compound 16j:**

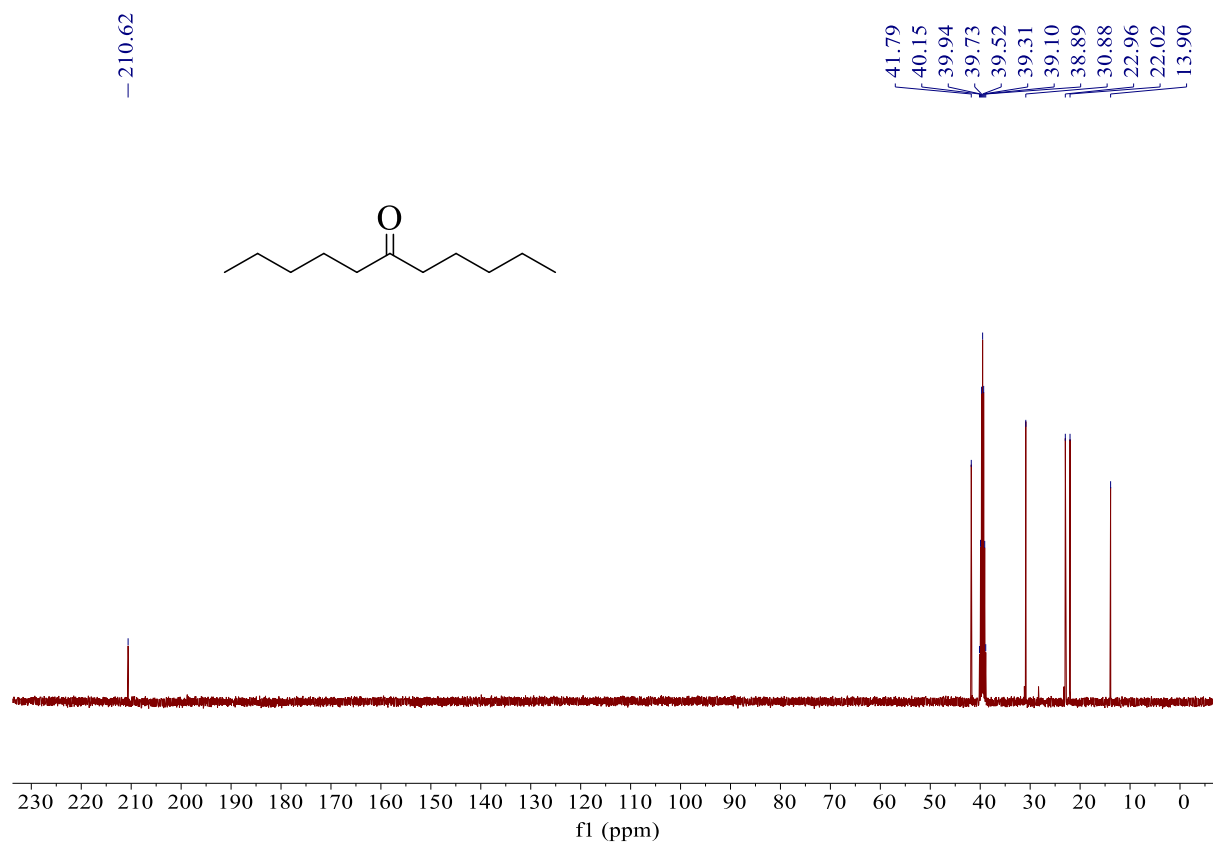

**<sup>1</sup>H NMR of compound 16k:**

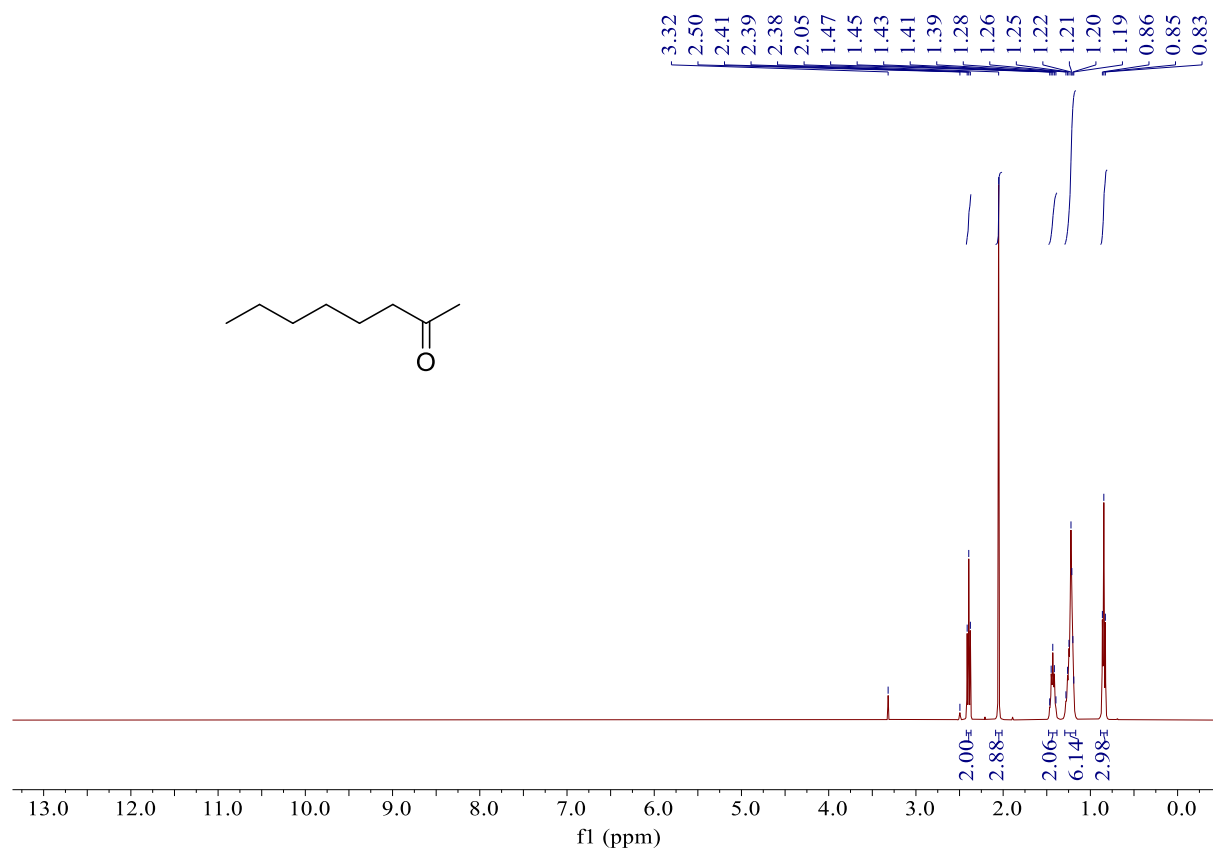

**<sup>13</sup>C NMR of compound 16k:**

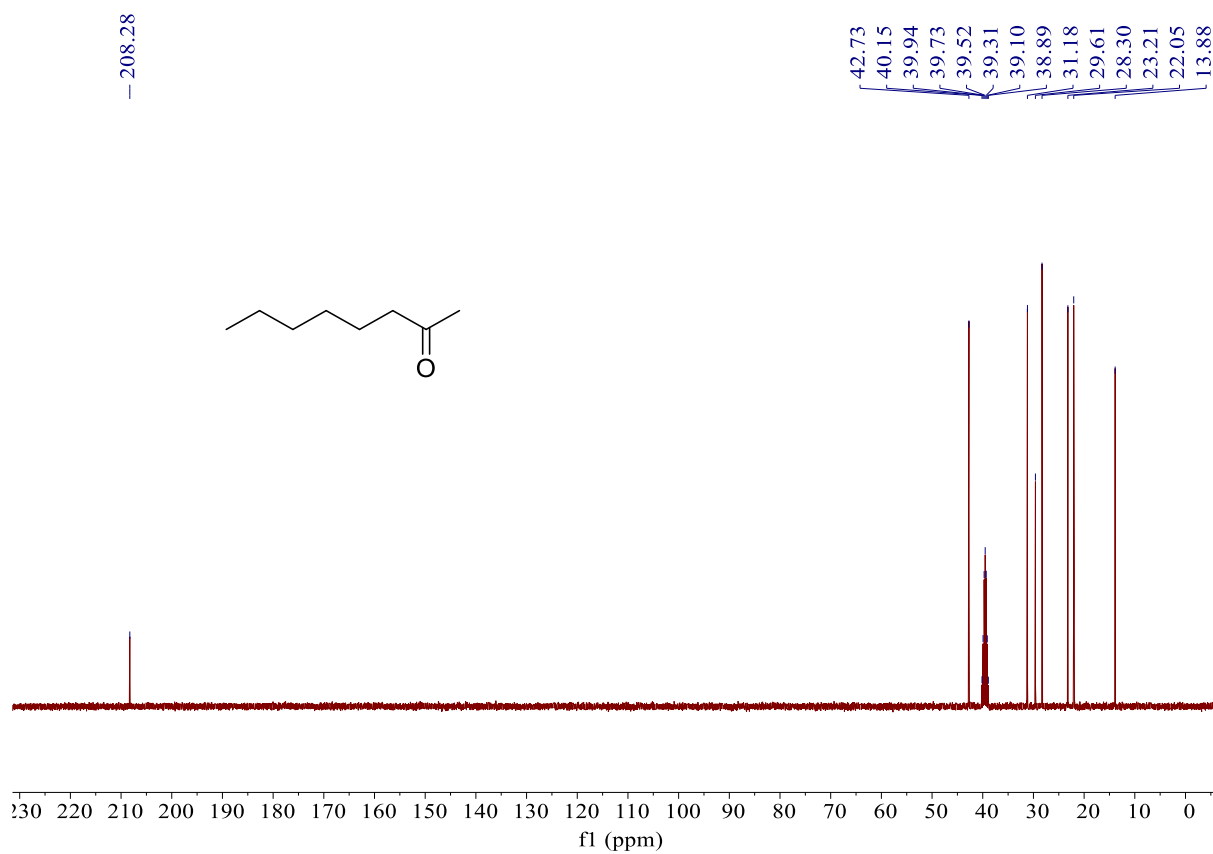

**<sup>1</sup>H NMR of compound 16l:**

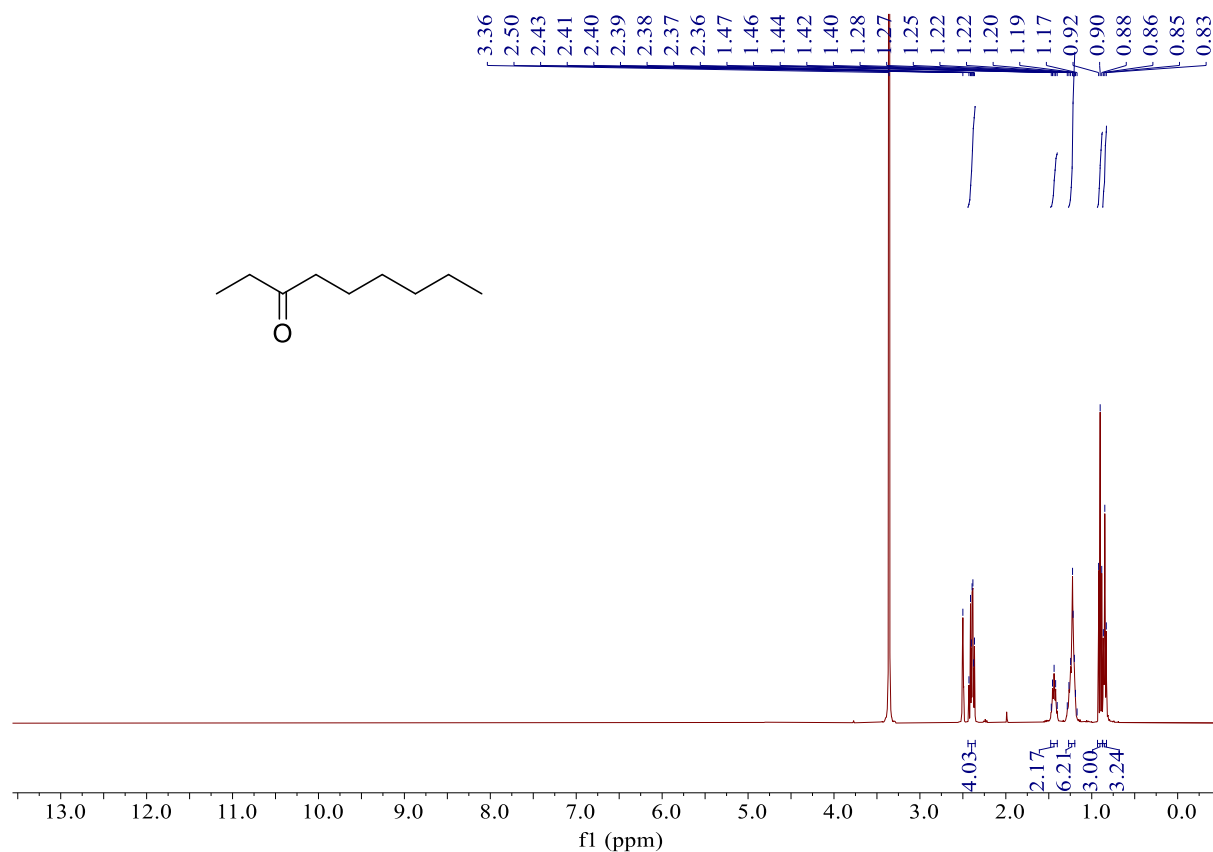

**<sup>13</sup>C NMR of compound 16l:**

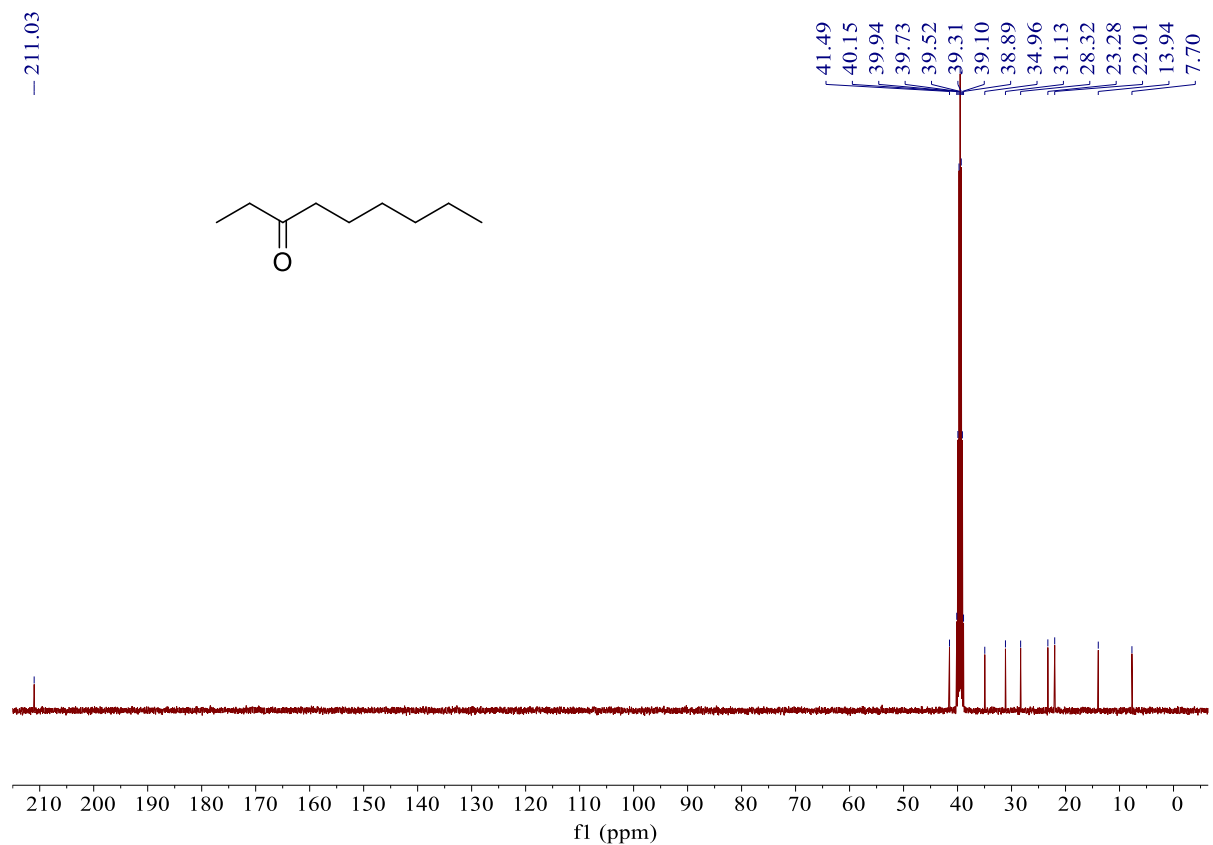

**<sup>1</sup>H NMR of compound 16m:**

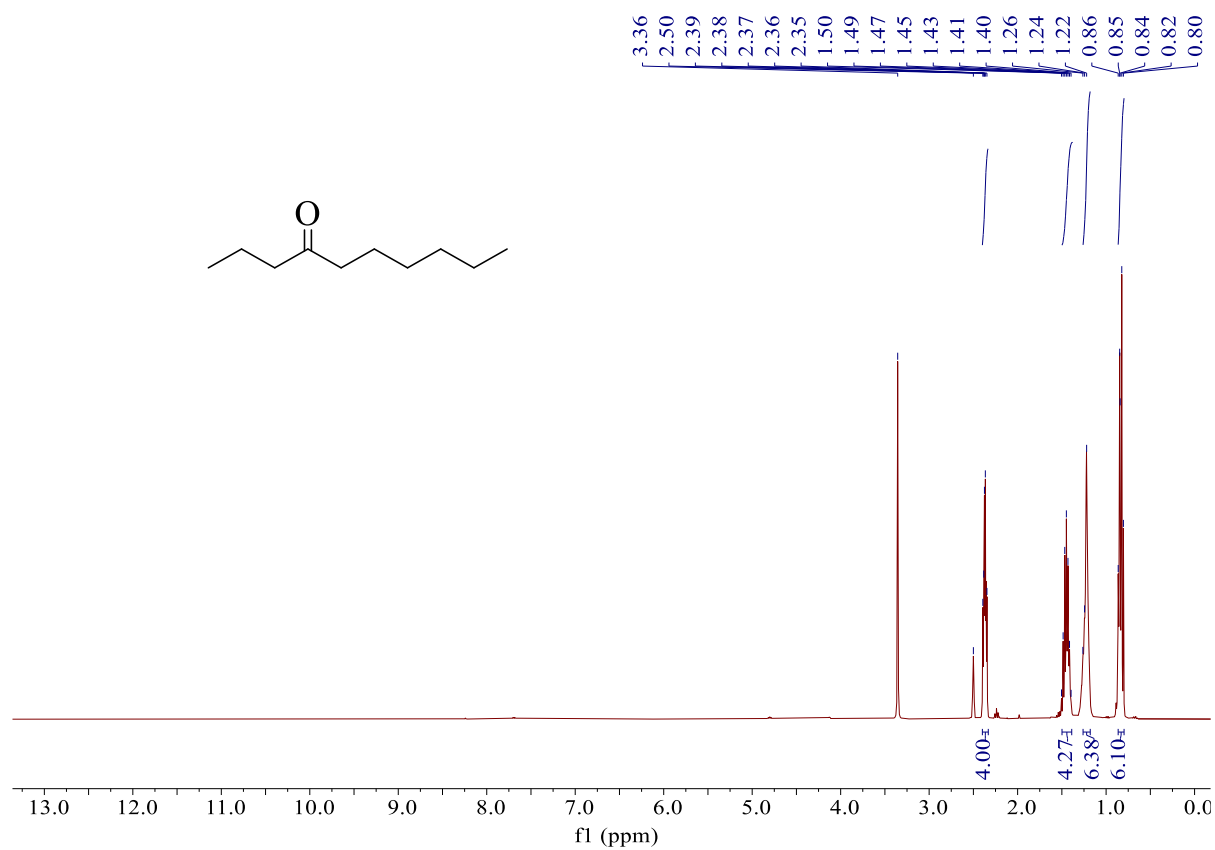

**<sup>13</sup>C NMR of compound 16m:**

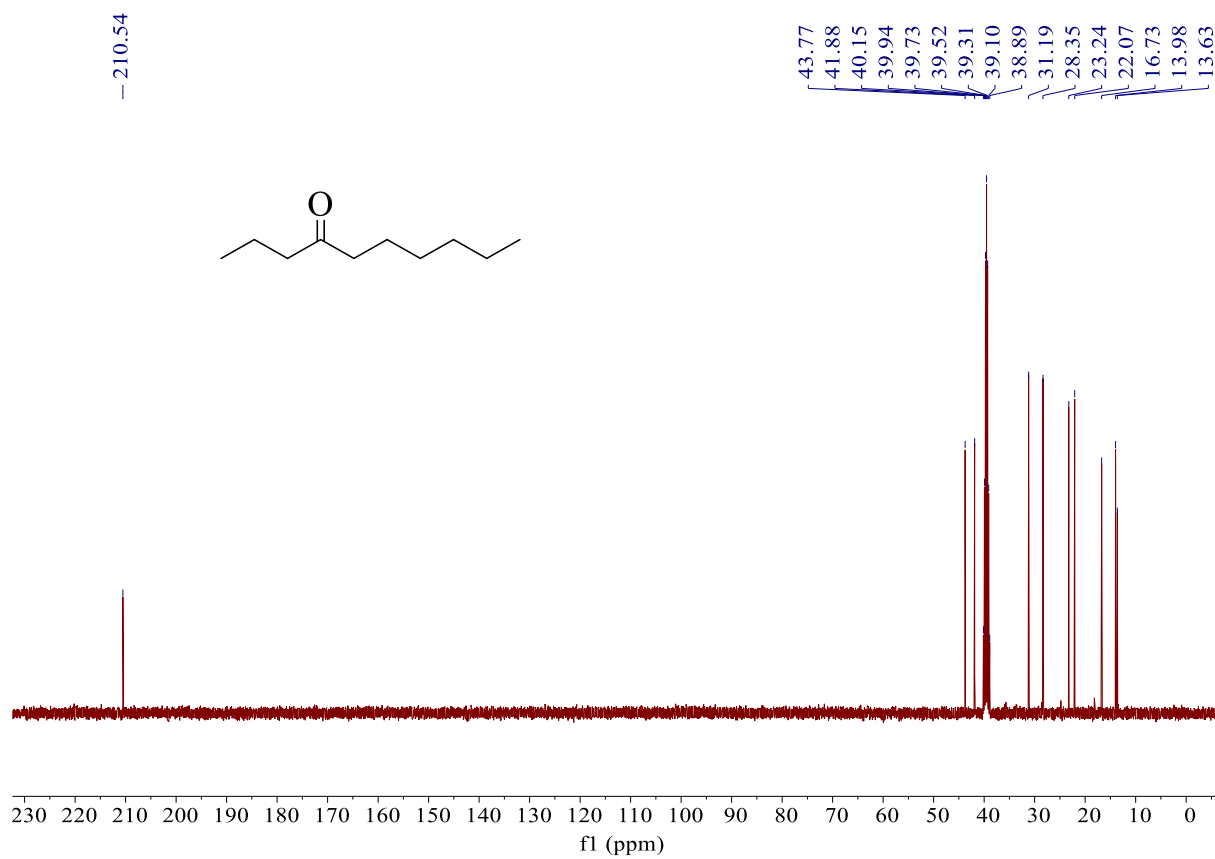

Supplement: d3qo02099a1.pdf [file d3qo02099a1.pdf]
